# Supplementary material
Source: HighWire-hosted journal article supplement (doi:10.1101/rna.076422.120)
Supplement: Supplemental_Legends.docx [file Supplemental_Legends.docx]

**Figure S1. Quality of RNA and RIP-seq analysis. (A)** Bioanalyzer images showing the quality and quantity of RNA before (input) and after (CIRBP IP) immunoprecipitation. **(B)** Coverage profiles of the input, CIRBP IP and IgG IP sequencing reactions after poly(A) selection. The dashed line represents the coverage of one of the inputs using total RNA-Seq. **(C)** Correlation plot of the two RIP-Seq replicates. **(D)** Analysis of significant CIRBP targets using DESeq2 on the full count annotation of genes or only the last 3 exons. Comparisons of IP versus input or IP versus IgG are shown. **(E)** Validation of RIP-Seq data by RT-qPCR. Blue, CIRBP targets described in this manuscript; green, CIRBP targets described in previous reports; grey, non-targets. Values represent the average of three replicates from two independent experiments, except for ACTB and EIF2A that correspond to the average of two technical replicates with similar values. Error bars represent standard deviation. Significant differences with LOXL1 was measured using Student's t-test (**pval<0.01, *pval<0.05).

**Figure S2. Efficiency of depletion assessed by Western blot (related to Figure 5). (A)** Related to Figure 5C. Depletion was assessed after 2 days. **(B)** Related to Figure 5D. Depletion was assessed at 6, 10 and 13 days with similar results. The image at 13 days is shown.
