# Supplementary material
Source: HighWire-hosted journal article supplement (doi:10.1101/rna.076422.120)
Supplement: Supplemental_Table_2.xlsx [file Supplemental_Table_2.xlsx]

## Sheet: Legend
Table S2: Genes changing after modulation of CIRP levels
Sheet 1 shows the 28 high confident CIRP targets (HCCT) that change after both CIRP OE and depletion (3-way overlap of Figure 4A)
Sheet 2 shows genes changing after CIRP depletion from MCF7 cells (pval<0.05)
Sheet 3 shows genes changing after CIRP over-expression in MCF10 cells (pval<0.05)

## Sheet: HCCT changing
High confident CIRP targets changing (28)	L2FC KD/ctrl (MCF7)	L2FC OE/Ctrl (MCF10)
AES	0.23	-0.34
ATP2A3	0.43	0.56
ATP5D	0.56	-0.49
C14orf80	0.37	-0.43
CDT1	0.32	-0.44
CRK	-0.18	0.32
CST3	0.294131	-0.629413
CTB-25B13.12	0.33	-0.68
CTSD	-0.25	-0.46
E2F1	0.35	-0.77
FNDC10	0.608124	-0.72709
HOMER3	0.4	-0.41
INF2	0.32	-0.37
KMT5C	0.37	1.74
LRRC75B	0.39	-0.55
MAPK11	0.34	-0.5
MEIS3	0.31	-0.44
NCAPH2	0.35	-0.33
PCSK1N	0.49	0.73
RPL28	0.18	-0.45
S100A11	0.288846	-0.418151
SEZ6L2	0.418814	-0.4344
SF3A2	0.17	-0.61
SFN	0.666354	0.37783
SLC25A10	0.689538	-0.411242
ST14	0.26	1.83
STK11	0.27	-0.4
TRIM28	0.242153	-0.37131
In red validated genes

## Sheet: CIRP depletion MCF7
Ensembl_gene_ID	external_gene_name	log2FoldChange_KD_vs_Ctrl	pvalue_KD_vs_Ctrl	padj_KD_vs_Ctrl
ENSG00000135318	NT5E	3.10969	0	0
ENSG00000136235	GPNMB	2.51925	6.86604e-178	5.556e-174
ENSG00000137573	SULF1	-1.66954	2.65717e-161	1.43345e-157
ENSG00000115461	IGFBP5	-1.67942	3.79786e-160	1.53661e-156
ENSG00000094755	GABRP	-1.69237	1.65731e-125	5.36438e-122
ENSG00000141424	SLC39A6	1.09645	6.05132e-118	1.63224e-114
ENSG00000164919	COX6C	1.00191	9.04355e-101	2.09087e-97
ENSG00000071575	TRIB2	1.65265	1.20329e-93	2.43427e-90
ENSG00000187210	GCNT1	-1.46692	3.74404e-85	6.73261e-82
ENSG00000134202	GSTM3	1.19888	3.8047e-82	6.15752e-79
ENSG00000254337	RP11-865I6.2	-1.36562	4.72917e-78	6.95789e-75
ENSG00000124466	LYPD3	1.12103	2.41618e-76	3.25862e-73
ENSG00000196139	AKR1C3	-1.71876	3.47569e-76	4.32697e-73
ENSG00000261578	RP11-21L23.2	-1.59296	4.27859e-76	4.94605e-73
ENSG00000113739	STC2	-0.92832	1.18667e-75	1.28034e-72
ENSG00000113328	CCNG1	-1.10793	8.78365e-75	8.88466e-72
ENSG00000139289	PHLDA1	-1.24522	1.70103e-67	1.61938e-64
ENSG00000167757	KLK11	-1.17265	2.97967e-66	2.67905e-63
ENSG00000198910	L1CAM	1.24687	2.84599e-65	2.42418e-62
ENSG00000164690	SHH	-1.151	5.10541e-64	4.1313e-61
ENSG00000197046	SIGLEC15	-1.66052	9.04958e-64	6.97421e-61
ENSG00000102445	RUBCNL	-1.83368	1.09733e-63	8.07235e-61
ENSG00000230836	LINC01293	-1.42675	3.91603e-63	2.75552e-60
ENSG00000189058	APOD	1.4339	2.371e-62	1.59884e-59
ENSG00000148735	PLEKHS1	-1.79528	3.78925e-62	2.45301e-59
ENSG00000039560	RAI14	-1.94091	1.34185e-61	8.35247e-59
ENSG00000166509	CLEC3A	-1.62069	6.94976e-61	4.16573e-58
ENSG00000174827	PDZK1	-1.7149	8.79376e-61	5.08279e-58
ENSG00000034510	TMSB10	0.818688	1.55489e-60	8.67736e-58
ENSG00000111057	KRT18	0.774472	2.51168e-58	1.35497e-55
ENSG00000079257	LXN	-1.01295	4.49631e-57	2.34736e-54
ENSG00000120875	DUSP4	-0.968493	7.89256e-57	3.99166e-54
ENSG00000006747	SCIN	-1.1007	1.01823e-56	4.99366e-54
ENSG00000150687	PRSS23	-0.990599	9.59895e-56	4.5691e-53
ENSG00000138639	ARHGAP24	1.65165	6.69825e-55	3.09727e-52
ENSG00000149809	TM7SF2	0.993088	2.70065e-54	1.21409e-51
ENSG00000137801	THBS1	0.721815	2.79418e-54	1.22219e-51
ENSG00000196549	MME	2.58263	3.9976e-54	1.70255e-51
ENSG00000137648	TMPRSS4	-1.13368	1.88418e-53	7.81885e-51
ENSG00000139352	ASCL1	2.28777	2.32209e-53	9.39518e-51
ENSG00000100644	HIF1A	-0.850112	3.45909e-53	1.36541e-50
ENSG00000164938	TP53INP1	-0.884407	2.09537e-50	8.07415e-48
ENSG00000128567	PODXL	0.919015	4.1598e-50	1.56563e-47
ENSG00000082175	PGR	-0.881539	2.71214e-49	9.97573e-47
ENSG00000099622	CIRBP	-0.954262	3.60697e-49	1.29723e-46
ENSG00000171401	KRT13	-2.04126	9.02721e-47	3.17601e-44
ENSG00000100219	XBP1	-0.706401	1.72765e-46	5.94899e-44
ENSG00000111319	SCNN1A	-1.11189	5.46349e-46	1.84211e-43
ENSG00000130600	H19	-1.21588	1.38576e-45	4.57697e-43
ENSG00000176788	BASP1	1.04855	2.34524e-45	7.59109e-43
ENSG00000101846	STS	-1.54563	3.84842e-45	1.22123e-42
ENSG00000167755	KLK6	-1.04863	3.18229e-44	9.90425e-42
ENSG00000170075	GPR37L1	-0.978379	4.72324e-44	1.44228e-41
ENSG00000125398	SOX9	-1.14829	8.74965e-44	2.6223e-41
ENSG00000123119	NECAB1	0.941099	6.13227e-43	1.80445e-40
ENSG00000204792	LINC01291	-1.4586	1.1103e-42	3.20878e-40
ENSG00000189171	S100A13	0.769393	2.23671e-42	6.3507e-40
ENSG00000106546	AHR	-1.01822	3.28977e-42	9.17958e-40
ENSG00000116690	PRG4	-2.0272	2.14143e-41	5.87406e-39
ENSG00000145819	ARHGAP26	-1.00688	3.18505e-41	8.59114e-39
ENSG00000236039	AC017060.1	-2.47493	1.1396e-40	3.02349e-38
ENSG00000205413	SAMD9	-1.40471	3.03256e-40	7.91596e-38
ENSG00000154330	PGM5	1.86311	4.07287e-40	1.04627e-37
ENSG00000151929	BAG3	0.839776	1.89572e-39	4.7938e-37
ENSG00000173193	PARP14	-1.18774	1.99094e-39	4.95712e-37
ENSG00000111799	COL12A1	-0.974128	4.25088e-39	1.04237e-36
ENSG00000164125	FAM198B	-1.25382	1.05061e-38	2.53778e-36
ENSG00000105518	TMEM205	0.85808	1.25049e-38	2.97616e-36
ENSG00000107562	CXCL12	-1.04721	1.30101e-38	3.05153e-36
ENSG00000137193	PIM1	-0.78277	4.51762e-38	1.04447e-35
ENSG00000175155	YPEL2	-0.855362	4.65165e-38	1.06032e-35
ENSG00000103056	SMPD3	-2.52274	4.95041e-38	1.11274e-35
ENSG00000227036	LINC00511	-1.33604	1.53647e-37	3.40634e-35
ENSG00000135773	CAPN9	-1.11379	2.11794e-37	4.63199e-35
ENSG00000130558	OLFM1	0.737469	2.96699e-37	6.40237e-35
ENSG00000115963	RND3	-0.691808	1.12578e-36	2.39732e-34
ENSG00000171724	VAT1L	-1.62948	2.96392e-36	6.22963e-34
ENSG00000139211	AMIGO2	0.853972	5.55134e-36	1.15183e-33
ENSG00000138496	PARP9	-1.12874	6.15461e-36	1.26084e-33
ENSG00000198959	TGM2	-1.48896	6.63442e-36	1.34214e-33
ENSG00000221866	PLXNA4	1.77683	9.76315e-36	1.9507e-33
ENSG00000169862	CTNND2	0.907918	2.58212e-35	5.09623e-33
ENSG00000105514	RAB3D	0.789881	3.70791e-35	7.22998e-33
ENSG00000143412	ANXA9	0.938426	1.00836e-34	1.94278e-32
ENSG00000133067	LGR6	-1.82762	1.07275e-34	2.04252e-32
ENSG00000134759	ELP2	0.639016	1.17994e-34	2.22048e-32
ENSG00000115241	PPM1G	0.631038	1.75701e-34	3.26845e-32
ENSG00000170421	KRT8	0.620312	2.59563e-34	4.76465e-32
ENSG00000135547	HEY2	-1.24258	2.62021e-34	4.76465e-32
ENSG00000146411	SLC2A12	-1.74636	3.62306e-34	6.51506e-32
ENSG00000183044	ABAT	0.702464	4.42017e-34	7.86111e-32
ENSG00000137868	STRA6	-1.7454	5.64925e-34	9.93777e-32
ENSG00000156804	FBXO32	-1.14212	6.23928e-34	1.08577e-31
ENSG00000064042	LIMCH1	-1.4764	7.92359e-34	1.36421e-31
ENSG00000101144	BMP7	0.671983	1.31541e-33	2.2409e-31
ENSG00000168269	FOXI1	2.26411	1.37637e-33	2.32033e-31
ENSG00000115468	EFHD1	0.80072	1.69485e-33	2.82779e-31
ENSG00000026508	CD44	-0.623843	3.0478e-33	5.03323e-31
ENSG00000163435	ELF3	-0.687796	3.56755e-33	5.83205e-31
ENSG00000004799	PDK4	-0.88388	4.05691e-33	6.5657e-31
ENSG00000130707	ASS1	0.603558	9.34889e-33	1.49804e-30
ENSG00000169583	CLIC3	1.1332	1.22304e-32	1.94056e-30
ENSG00000152661	GJA1	-2.11167	2.0354e-32	3.19814e-30
ENSG00000177694	NAALADL2	-1.02938	2.12161e-32	3.30155e-30
ENSG00000187837	HIST1H1C	0.868955	5.48985e-32	8.46169e-30
ENSG00000132329	RAMP1	2.14443	7.06699e-32	1.07898e-29
ENSG00000257093	KIAA1147	-0.7558	9.49564e-32	1.43624e-29
ENSG00000198797	BRINP2	-1.94701	1.3568e-31	2.03319e-29
ENSG00000134352	IL6ST	-0.897177	1.90811e-31	2.83311e-29
ENSG00000127334	DYRK2	-0.689278	2.13161e-31	3.13617e-29
ENSG00000124249	KCNK15	0.900183	3.25506e-31	4.74594e-29
ENSG00000147255	IGSF1	-0.763965	4.00734e-31	5.7906e-29
ENSG00000181143	MUC16	-0.920838	4.43779e-31	6.35586e-29
ENSG00000182263	FIGN	-0.889173	5.96307e-31	8.46546e-29
ENSG00000101098	RIMS4	0.98304	1.58901e-30	2.23622e-28
ENSG00000069020	MAST4	-0.759579	4.48477e-30	6.25703e-28
ENSG00000163840	DTX3L	-0.937533	8.78602e-30	1.21532e-27
ENSG00000148700	ADD3	-1.13672	1.51089e-29	2.07223e-27
ENSG00000138413	IDH1	-0.816626	4.17654e-29	5.68009e-27
ENSG00000158710	TAGLN2	0.621331	5.0394e-29	6.79647e-27
ENSG00000171004	HS6ST2	-1.34125	8.50911e-29	1.13811e-26
ENSG00000112419	PHACTR2	-0.768148	8.63738e-29	1.1458e-26
ENSG00000140941	MAP1LC3B	-0.571946	1.22571e-28	1.61276e-26
ENSG00000182195	LDOC1	0.720801	1.57273e-28	2.05267e-26
ENSG00000159388	BTG2	-0.793187	1.76247e-28	2.2819e-26
ENSG00000136205	TNS3	-0.827294	1.85869e-28	2.38738e-26
ENSG00000164761	TNFRSF11B	1.11639	2.98488e-28	3.80373e-26
ENSG00000115919	KYNU	0.573816	3.30013e-28	4.1726e-26
ENSG00000215182	MUC5AC	-1.62207	3.46673e-28	4.34926e-26
ENSG00000101986	ABCD1	1.15863	3.53352e-28	4.39897e-26
ENSG00000074527	NTN4	-0.699337	1.06751e-27	1.31882e-25
ENSG00000048392	RRM2B	-0.625586	1.20139e-27	1.47297e-25
ENSG00000106415	GLCCI1	-0.81202	1.63813e-27	1.99334e-25
ENSG00000197261	C6orf141	0.739804	2.49222e-27	3.01e-25
ENSG00000163644	PPM1K	-0.706183	2.97687e-27	3.56872e-25
ENSG00000138061	CYP1B1	-0.607792	3.36465e-27	4.00393e-25
ENSG00000112531	QKI	-0.764553	3.8751e-27	4.57771e-25
ENSG00000182871	COL18A1	0.653347	5.1831e-27	6.0785e-25
ENSG00000047346	FAM214A	-0.671059	6.17893e-27	7.19423e-25
ENSG00000074800	ENO1	0.574502	6.87624e-27	7.94894e-25
ENSG00000172461	FUT9	-0.945836	8.28551e-27	9.51012e-25
ENSG00000181019	NQO1	-0.603709	8.88852e-27	1.01304e-24
ENSG00000139323	POC1B	-0.683056	1.68089e-26	1.90235e-24
ENSG00000150593	PDCD4	-0.61726	2.64051e-26	2.96764e-24
ENSG00000196739	COL27A1	-1.30597	4.62878e-26	5.16636e-24
ENSG00000140526	ABHD2	-0.666805	4.68426e-26	5.19247e-24
ENSG00000198840	MT-ND3	0.579995	4.81642e-26	5.30265e-24
ENSG00000185551	NR2F2	-0.582509	5.26197e-26	5.75404e-24
ENSG00000132837	DMGDH	-1.18197	6.9419e-26	7.54011e-24
ENSG00000185650	ZFP36L1	-0.54205	8.10001e-26	8.73937e-24
ENSG00000157110	RBPMS	-0.605483	9.43366e-26	1.01109e-23
ENSG00000076685	NT5C2	-0.620855	9.89038e-26	1.05307e-23
ENSG00000107518	ATRNL1	-0.809949	1.11438e-25	1.17876e-23
ENSG00000182054	IDH2	0.634414	2.17226e-25	2.28284e-23
ENSG00000064787	BCAS1	-0.767217	2.73797e-25	2.85879e-23
ENSG00000136451	VEZF1	-0.582316	3.30455e-25	3.42826e-23
ENSG00000135549	PKIB	-0.6627	5.76023e-25	5.9378e-23
ENSG00000106077	ABHD11	0.649319	6.33029e-25	6.48414e-23
ENSG00000204616	TRIM31	-1.81671	6.40679e-25	6.52122e-23
ENSG00000088340	FER1L4	-0.609715	6.63687e-25	6.71319e-23
ENSG00000116285	ERRFI1	-0.672189	8.21299e-25	8.25584e-23
ENSG00000187017	ESPN	0.953673	8.33449e-25	8.32626e-23
ENSG00000132170	PPARG	-1.00625	8.52042e-25	8.45979e-23
ENSG00000254231	CTD-2284J15.1	-1.19829	9.67076e-25	9.52657e-23
ENSG00000198888	MT-ND1	0.530008	9.71258e-25	9.52657e-23
ENSG00000125968	ID1	-0.910662	9.85058e-25	9.60372e-23
ENSG00000184613	NELL2	2.02901	1.12497e-24	1.09021e-22
ENSG00000085063	CD59	0.576667	1.24513e-24	1.19948e-22
ENSG00000086548	CEACAM6	-1.51266	2.021e-24	1.93538e-22
ENSG00000248905	FMN1	-0.66467	3.08202e-24	2.93408e-22
ENSG00000052344	PRSS8	0.657869	5.62628e-24	5.32489e-22
ENSG00000122877	EGR2	-0.89728	5.75714e-24	5.41707e-22
ENSG00000113615	SEC24A	-0.674088	6.31373e-24	5.90644e-22
ENSG00000198886	MT-ND4	0.452961	6.88225e-24	6.40128e-22
ENSG00000249242	TMEM150C	0.652705	8.37862e-24	7.74855e-22
ENSG00000278828	HIST1H3H	1.03738	8.92825e-24	8.20993e-22
ENSG00000180694	TMEM64	0.676407	9.48544e-24	8.67301e-22
ENSG00000143061	IGSF3	0.603888	1.14381e-23	1.03997e-21
ENSG00000115457	IGFBP2	-0.82938	1.15356e-23	1.04298e-21
ENSG00000254251	RP11-662G23.1	0.665228	1.17688e-23	1.05814e-21
ENSG00000167680	SEMA6B	1.45771	1.289e-23	1.15255e-21
ENSG00000172889	EGFL7	1.14348	1.50001e-23	1.33385e-21
ENSG00000113916	BCL6	-0.697783	1.61056e-23	1.42433e-21
ENSG00000185634	SHC4	1.78206	1.68286e-23	1.48019e-21
ENSG00000180611	MB21D2	0.957682	1.70838e-23	1.49451e-21
ENSG00000203697	CAPN8	-0.597167	1.78323e-23	1.5516e-21
ENSG00000166833	NAV2	-0.908657	1.80902e-23	1.56563e-21
ENSG00000008513	ST3GAL1	0.856327	2.12941e-23	1.83311e-21
ENSG00000183401	CCDC159	0.944914	2.52941e-23	2.16592e-21
ENSG00000198380	GFPT1	-0.594749	3.45487e-23	2.94282e-21
ENSG00000197043	ANXA6	0.75994	3.51372e-23	2.97728e-21
ENSG00000197457	STMN3	0.865004	5.52274e-23	4.65521e-21
ENSG00000084628	NKAIN1	1.80582	5.98999e-23	5.0229e-21
ENSG00000070404	FSTL3	1.12946	6.45822e-23	5.38762e-21
ENSG00000272398	CD24	0.517592	7.35483e-23	6.10413e-21
ENSG00000118689	FOXO3	-0.614652	8.06277e-23	6.65754e-21
ENSG00000092929	UNC13D	0.936819	8.70929e-23	7.15488e-21
ENSG00000106031	HOXA13	-1.59246	9.41471e-23	7.69534e-21
ENSG00000165156	ZHX1	-0.607451	1.11416e-22	9.06107e-21
ENSG00000160293	VAV2	0.61525	1.39786e-22	1.13115e-20
ENSG00000253123	RP11-527N22.1	-1.88723	1.52059e-22	1.22434e-20
ENSG00000105929	ATP6V0A4	1.58894	1.59708e-22	1.27956e-20
ENSG00000180573	HIST1H2AC	0.665277	1.77525e-22	1.41531e-20
ENSG00000251095	RP11-115D19.1	-1.46669	2.06371e-22	1.63721e-20
ENSG00000179388	EGR3	-0.675736	2.09762e-22	1.656e-20
ENSG00000166750	SLFN5	-0.916306	2.21266e-22	1.73833e-20
ENSG00000126821	SGPP1	-0.946147	2.74132e-22	2.14326e-20
ENSG00000151414	NEK7	-0.640459	4.0782e-22	3.17315e-20
ENSG00000175130	MARCKSL1	0.611984	6.68437e-22	5.17607e-20
ENSG00000243323	PTPRVP	-1.36369	7.7188e-22	5.94862e-20
ENSG00000213937	CLDN9	0.85369	1.11185e-21	8.52805e-20
ENSG00000182158	CREB3L2	-0.692238	1.36874e-21	1.04489e-19
ENSG00000141469	SLC14A1	-1.83796	2.20187e-21	1.67301e-19
ENSG00000168264	IRF2BP2	-0.522903	2.57484e-21	1.94725e-19
ENSG00000135842	FAM129A	-1.05315	4.46243e-21	3.35907e-19
ENSG00000123124	WWP1	-0.480687	5.56431e-21	4.16911e-19
ENSG00000124215	CDH26	-0.713796	6.2337e-21	4.64914e-19
ENSG00000147202	DIAPH2	-0.661519	7.79654e-21	5.78804e-19
ENSG00000135052	GOLM1	-0.728216	9.44436e-21	6.97934e-19
ENSG00000197747	S100A10	0.466952	1.05574e-20	7.7664e-19
ENSG00000012779	ALOX5	-1.63645	1.65851e-20	1.21454e-18
ENSG00000255571	MIR9-3HG	1.08919	2.17724e-20	1.58723e-18
ENSG00000101210	EEF1A2	0.623364	2.61843e-20	1.9003e-18
ENSG00000160211	G6PD	0.687552	2.68787e-20	1.94199e-18
ENSG00000185215	TNFAIP2	-0.878175	2.88628e-20	2.07607e-18
ENSG00000177570	SAMD12	-0.75411	3.09358e-20	2.21533e-18
ENSG00000155744	FAM126B	-0.812477	3.57216e-20	2.54678e-18
ENSG00000171617	ENC1	0.536674	3.59861e-20	2.55438e-18
ENSG00000130513	GDF15	-0.800543	3.86661e-20	2.73263e-18
ENSG00000138642	HERC6	-0.885784	3.88476e-20	2.73352e-18
ENSG00000167642	SPINT2	0.486282	4.18782e-20	2.93402e-18
ENSG00000179715	PCED1B	0.746256	4.45585e-20	3.10834e-18
ENSG00000171848	RRM2	0.581055	4.49657e-20	3.12329e-18
ENSG00000065613	SLK	-0.52651	6.85801e-20	4.74316e-18
ENSG00000088367	EPB41L1	-0.623994	9.14922e-20	6.3009e-18
ENSG00000198938	MT-CO3	0.501386	1.01296e-19	6.9465e-18
ENSG00000264112	RP11-159D12.2	-0.781176	1.10365e-19	7.53647e-18
ENSG00000263639	MSMB	-0.941782	1.11041e-19	7.55079e-18
ENSG00000165288	BRWD3	-1.09753	1.13797e-19	7.70581e-18
ENSG00000134986	NREP	-1.06725	1.18704e-19	8.00459e-18
ENSG00000114796	KLHL24	-0.666309	1.54058e-19	1.03455e-17
ENSG00000091409	ITGA6	-0.732317	1.60074e-19	1.07051e-17
ENSG00000145675	PIK3R1	-0.492423	1.66336e-19	1.10781e-17
ENSG00000132470	ITGB4	0.565772	1.67834e-19	1.11321e-17
ENSG00000196141	SPATS2L	-0.537199	1.80703e-19	1.19367e-17
ENSG00000156049	GNA14	-0.930045	1.96516e-19	1.29285e-17
ENSG00000180530	NRIP1	-0.438043	2.3777e-19	1.55793e-17
ENSG00000147883	CDKN2B	1.0888	2.44309e-19	1.59431e-17
ENSG00000118680	MYL12B	0.442296	2.68175e-19	1.74303e-17
ENSG00000042062	FAM65C	1.47439	2.70488e-19	1.75103e-17
ENSG00000175793	SFN	0.666354	2.75519e-19	1.77649e-17
ENSG00000108244	KRT23	-1.15649	2.80544e-19	1.80172e-17
ENSG00000173467	AGR3	-0.622769	3.14119e-19	2.00937e-17
ENSG00000151012	SLC7A11	-0.638098	3.71919e-19	2.36974e-17
ENSG00000187398	LUZP2	-1.62775	4.93548e-19	3.13238e-17
ENSG00000103335	PIEZO1	0.509059	6.30926e-19	3.98863e-17
ENSG00000143995	MEIS1	-0.773627	7.23411e-19	4.55552e-17
ENSG00000118515	SGK1	-0.600505	7.78908e-19	4.88598e-17
ENSG00000138074	SLC5A6	0.534952	7.85206e-19	4.90648e-17
ENSG00000173599	PC	0.84356	8.06874e-19	5.02248e-17
ENSG00000165650	PDZD8	-0.706707	8.60266e-19	5.33431e-17
ENSG00000107984	DKK1	0.664494	8.80217e-19	5.43719e-17
ENSG00000182704	TSKU	-0.665878	1.11415e-18	6.85607e-17
ENSG00000131370	SH3BP5	0.493584	1.24381e-18	7.62491e-17
ENSG00000120885	CLU	0.50003	1.3109e-18	8.00587e-17
ENSG00000089127	OAS1	-1.27225	1.34969e-18	8.21179e-17
ENSG00000168209	DDIT4	-0.542963	1.36479e-18	8.27259e-17
ENSG00000111816	FRK	-0.809707	1.50915e-18	9.11344e-17
ENSG00000124813	RUNX2	-0.731513	1.52262e-18	9.16062e-17
ENSG00000102531	FNDC3A	-0.577227	1.57801e-18	9.45871e-17
ENSG00000049323	LTBP1	0.629828	1.80064e-18	1.07533e-16
ENSG00000144802	NFKBIZ	-0.56329	1.87502e-18	1.11564e-16
ENSG00000153250	RBMS1	-0.610549	1.94042e-18	1.15032e-16
ENSG00000084444	FAM234B	0.667384	1.9768e-18	1.16761e-16
ENSG00000104889	RNASEH2A	0.555321	2.14919e-18	1.26482e-16
ENSG00000029993	HMGB3	0.47102	2.44271e-18	1.43235e-16
ENSG00000133816	MICAL2	-0.757392	2.5155e-18	1.46971e-16
ENSG00000173706	HEG1	1.10329	2.53016e-18	1.47295e-16
ENSG00000167106	FAM102A	-0.507445	2.88075e-18	1.67104e-16
ENSG00000169604	ANTXR1	-0.766124	2.97902e-18	1.72187e-16
ENSG00000149782	PLCB3	0.548355	3.33308e-18	1.91966e-16
ENSG00000120738	EGR1	-0.535408	3.60563e-18	2.06927e-16
ENSG00000020577	SAMD4A	-0.834676	3.81903e-18	2.184e-16
ENSG00000245848	CEBPA	0.798364	4.93898e-18	2.81452e-16
ENSG00000196730	DAPK1	-1.13936	5.19073e-18	2.94761e-16
ENSG00000164120	HPGD	-0.897721	5.5269e-18	3.12753e-16
ENSG00000103485	QPRT	0.819551	6.41194e-18	3.61571e-16
ENSG00000174718	KIAA1551	-0.589479	7.90291e-18	4.441e-16
ENSG00000059728	MXD1	-0.568496	8.12244e-18	4.54857e-16
ENSG00000058404	CAMK2B	0.854859	9.60581e-18	5.36071e-16
ENSG00000198931	APRT	0.513039	9.71691e-18	5.40407e-16
ENSG00000173402	DAG1	0.517536	1.09482e-17	6.06798e-16
ENSG00000186834	HEXIM1	0.58142	1.09956e-17	6.07349e-16
ENSG00000088002	SULT2B1	0.702817	1.17322e-17	6.45831e-16
ENSG00000140859	KIFC3	1.03988	1.34141e-17	7.35912e-16
ENSG00000145012	LPP	-0.536033	1.39825e-17	7.64505e-16
ENSG00000116039	ATP6V1B1	-0.596745	1.40613e-17	7.66222e-16
ENSG00000130720	FIBCD1	0.719791	1.49778e-17	8.13427e-16
ENSG00000145349	CAMK2D	-0.634806	1.51113e-17	8.17932e-16
ENSG00000131153	GINS2	0.518026	1.60003e-17	8.63163e-16
ENSG00000109787	KLF3	-0.494527	1.68661e-17	9.06849e-16
ENSG00000115525	ST3GAL5	-0.933467	1.78208e-17	9.55005e-16
ENSG00000176532	PRR15	-0.890552	1.85513e-17	9.90871e-16
ENSG00000138434	SSFA2	0.432073	1.94138e-17	1.03353e-15
ENSG00000204054	LINC00963	-0.475308	2.44577e-17	1.29778e-15
ENSG00000172667	ZMAT3	-0.6437	2.89236e-17	1.52973e-15
ENSG00000171346	KRT15	-0.772447	3.10798e-17	1.63842e-15
ENSG00000187720	THSD4	0.527753	3.82849e-17	2.0117e-15
ENSG00000171345	KRT19	0.479985	4.16675e-17	2.18235e-15
ENSG00000181222	POLR2A	0.46512	4.30081e-17	2.2453e-15
ENSG00000123908	AGO2	-0.479055	4.3387e-17	2.2578e-15
ENSG00000173334	TRIB1	-0.539262	4.42005e-17	2.29276e-15
ENSG00000064205	WISP2	0.530644	4.82368e-17	2.49414e-15
ENSG00000054983	GALC	0.551306	4.96354e-17	2.55828e-15
ENSG00000004399	PLXND1	0.490254	5.64734e-17	2.90148e-15
ENSG00000102362	SYTL4	-0.634635	5.83062e-17	2.98617e-15
ENSG00000180891	CUEDC1	-0.487747	5.8699e-17	2.9968e-15
ENSG00000143570	SLC39A1	0.459109	6.13053e-17	3.12001e-15
ENSG00000146247	PHIP	-0.502396	6.47064e-17	3.28227e-15
ENSG00000152926	ZNF117	-0.530982	6.48991e-17	3.28227e-15
ENSG00000261324	RP11-174G6.5	-0.757499	7.19625e-17	3.62816e-15
ENSG00000143815	LBR	-0.611328	7.90616e-17	3.97371e-15
ENSG00000145911	N4BP3	0.476449	8.19312e-17	4.10519e-15
ENSG00000131788	PIAS3	-0.492198	8.55723e-17	4.27439e-15
ENSG00000143845	ETNK2	0.958059	9.37364e-17	4.66778e-15
ENSG00000099219	ERMP1	-0.420929	1.02524e-16	5.0897e-15
ENSG00000109586	GALNT7	-0.471675	1.02881e-16	5.09184e-15
ENSG00000139629	GALNT6	0.876263	1.11139e-16	5.48378e-15
ENSG00000100852	ARHGAP5	-0.666154	1.15309e-16	5.67222e-15
ENSG00000111331	OAS3	-0.708787	1.26434e-16	6.18992e-15
ENSG00000074410	CA12	0.487804	1.26598e-16	6.18992e-15
ENSG00000140481	CCDC33	-1.48406	1.30523e-16	6.3626e-15
ENSG00000105983	LMBR1	-0.516414	1.32611e-16	6.44495e-15
ENSG00000144452	ABCA12	0.630986	1.34962e-16	6.53961e-15
ENSG00000109321	AREG	0.520154	1.37787e-16	6.65657e-15
ENSG00000147162	OGT	-0.461685	1.53348e-16	7.38628e-15
ENSG00000204740	MALRD1	0.683349	1.64515e-16	7.90063e-15
ENSG00000156463	SH3RF2	-1.09853	1.74797e-16	8.36958e-15
ENSG00000172493	AFF1	-0.532845	1.89565e-16	9.04993e-15
ENSG00000091436	MAP3K20	0.538834	2.00695e-16	9.55307e-15
ENSG00000178719	GRINA	0.476035	2.03123e-16	9.6403e-15
ENSG00000130635	COL5A1	0.597455	2.66435e-16	1.26082e-14
ENSG00000049541	RFC2	0.50027	2.75423e-16	1.29955e-14
ENSG00000215845	TSTD1	0.610689	2.85619e-16	1.34374e-14
ENSG00000130827	PLXNA3	0.499526	3.1812e-16	1.4923e-14
ENSG00000183346	C10orf107	-1.40118	3.29557e-16	1.54149e-14
ENSG00000188404	SELL	-0.867257	3.53102e-16	1.64686e-14
ENSG00000196932	TMEM26	-0.674638	3.98078e-16	1.85129e-14
ENSG00000079482	OPHN1	-0.740028	4.01555e-16	1.86211e-14
ENSG00000163349	HIPK1	-0.394916	4.18013e-16	1.93289e-14
ENSG00000215218	UBE2QL1	1.55763	4.20128e-16	1.93714e-14
ENSG00000198712	MT-CO2	0.427279	4.83372e-16	2.22241e-14
ENSG00000130520	LSM4	0.502035	4.99412e-16	2.28966e-14
ENSG00000197321	SVIL	-0.511592	7.22987e-16	3.30532e-14
ENSG00000173113	TRMT112	0.492764	8.07105e-16	3.67949e-14
ENSG00000120725	SIL1	0.678798	9.38054e-16	4.26446e-14
ENSG00000112715	VEGFA	-0.41559	1.03838e-15	4.7073e-14
ENSG00000068697	LAPTM4A	0.398605	1.17114e-15	5.29434e-14
ENSG00000105655	ISYNA1	0.710667	1.19946e-15	5.40727e-14
ENSG00000279117	CTD-2562J17.6	-0.698899	1.21999e-15	5.48455e-14
ENSG00000117115	PADI2	0.820015	1.25967e-15	5.64724e-14
ENSG00000150672	DLG2	-0.844347	1.37839e-15	6.16239e-14
ENSG00000169129	AFAP1L2	0.933102	1.41512e-15	6.30918e-14
ENSG00000198899	MT-ATP6	0.390066	1.44488e-15	6.42418e-14
ENSG00000147256	ARHGAP36	-0.727233	1.67038e-15	7.40642e-14
ENSG00000171988	JMJD1C	-0.525238	1.68799e-15	7.46405e-14
ENSG00000142156	COL6A1	0.987221	1.768e-15	7.79653e-14
ENSG00000150551	LYPD1	0.603538	1.87157e-15	8.23082e-14
ENSG00000168461	RAB31	0.451312	1.89376e-15	8.30584e-14
ENSG00000108518	PFN1	0.422072	1.99964e-15	8.74652e-14
ENSG00000105810	CDK6	0.560074	2.22819e-15	9.71995e-14
ENSG00000185745	IFIT1	-1.33509	2.30772e-15	1.00398e-13
ENSG00000172965	MIR4435-2HG	0.815713	2.65153e-15	1.15046e-13
ENSG00000169241	SLC50A1	0.554547	2.95238e-15	1.27758e-13
ENSG00000119333	WDR34	0.501648	3.04299e-15	1.31327e-13
ENSG00000116990	MYCL	-0.701924	3.05302e-15	1.3141e-13
ENSG00000148346	LCN2	-1.58609	3.14636e-15	1.35068e-13
ENSG00000172757	CFL1	0.370661	3.75441e-15	1.60744e-13
ENSG00000089159	PXN	0.404182	3.80514e-15	1.62486e-13
ENSG00000185825	BCAP31	0.489249	3.94485e-15	1.68009e-13
ENSG00000198763	MT-ND2	0.444155	4.09495e-15	1.73944e-13
ENSG00000173227	SYT12	0.617362	4.35921e-15	1.84685e-13
ENSG00000210082	MT-RNR2	0.424926	4.55679e-15	1.92551e-13
ENSG00000172270	BSG	0.473976	4.87479e-15	2.05452e-13
ENSG00000188157	AGRN	0.525554	5.03525e-15	2.11663e-13
ENSG00000165105	RASEF	-0.55395	6.02021e-15	2.52412e-13
ENSG00000114439	BBX	-0.523509	6.56594e-15	2.74582e-13
ENSG00000049246	PER3	-0.560732	6.69271e-15	2.79162e-13
ENSG00000185567	AHNAK2	0.947157	7.40186e-15	3.07948e-13
ENSG00000205730	ITPRIPL2	-0.656066	9.76147e-15	4.04612e-13
ENSG00000135046	ANXA1	-0.500664	9.77529e-15	4.04612e-13
ENSG00000124225	PMEPA1	0.425873	1.15565e-14	4.77117e-13
ENSG00000067840	PDZD4	0.831074	1.17999e-14	4.8593e-13
ENSG00000163704	PRRT3	0.788886	1.28432e-14	5.27551e-13
ENSG00000131844	MCCC2	0.387136	1.39228e-14	5.70448e-13
ENSG00000105388	CEACAM5	-1.35117	1.46878e-14	6.00269e-13
ENSG00000188643	S100A16	0.672889	1.49052e-14	6.0762e-13
ENSG00000164294	GPX8	-0.616241	1.57959e-14	6.42314e-13
ENSG00000181904	C5orf24	-0.583946	1.61722e-14	6.55965e-13
ENSG00000123095	BHLHE41	-1.16321	1.77176e-14	7.16856e-13
ENSG00000278709	NKILA	0.819727	1.81806e-14	7.33295e-13
ENSG00000030419	IKZF2	-0.724194	1.82146e-14	7.33295e-13
ENSG00000181026	AEN	-0.512203	2.07806e-14	8.34524e-13
ENSG00000205488	CALML3-AS1	-0.679172	2.15086e-14	8.61624e-13
ENSG00000136167	LCP1	-0.786059	2.36636e-14	9.45611e-13
ENSG00000140416	TPM1	-0.394989	2.40226e-14	9.57589e-13
ENSG00000167183	PRR15L	0.518971	2.51115e-14	9.98536e-13
ENSG00000153944	MSI2	-0.446901	2.62478e-14	1.04116e-12
ENSG00000121966	CXCR4	-0.924021	2.67219e-14	1.05738e-12
ENSG00000100934	SEC23A	-0.496311	2.83272e-14	1.11816e-12
ENSG00000165929	TC2N	-0.421328	2.9364e-14	1.15627e-12
ENSG00000198727	MT-CYB	0.373825	3.031e-14	1.19062e-12
ENSG00000159348	CYB5R1	0.527981	3.14578e-14	1.23272e-12
ENSG00000179010	MRFAP1	0.368293	3.21766e-14	1.25784e-12
ENSG00000135931	ARMC9	0.614032	3.30178e-14	1.28761e-12
ENSG00000115216	NRBP1	0.418018	3.31898e-14	1.29121e-12
ENSG00000111885	MAN1A1	-0.573823	3.36491e-14	1.30594e-12
ENSG00000244187	TMEM141	0.73766	3.40899e-14	1.31988e-12
ENSG00000248429	RP11-597D13.9	-0.806521	3.55398e-14	1.37274e-12
ENSG00000167815	PRDX2	0.491712	3.85963e-14	1.48724e-12
ENSG00000053371	AKR7A2	0.529716	3.9432e-14	1.51584e-12
ENSG00000134533	RERG	-0.590815	4.16956e-14	1.59565e-12
ENSG00000140479	PCSK6	0.563548	4.17053e-14	1.59565e-12
ENSG00000112992	NNT	-0.453455	4.18999e-14	1.59931e-12
ENSG00000101474	APMAP	0.464821	4.31572e-14	1.64343e-12
ENSG00000095564	BTAF1	-0.431246	4.50163e-14	1.7102e-12
ENSG00000138646	HERC5	-1.05295	6.08199e-14	2.30518e-12
ENSG00000076356	PLXNA2	-0.985523	6.3301e-14	2.39361e-12
ENSG00000185475	TMEM179B	0.543683	6.3821e-14	2.40764e-12
ENSG00000058063	ATP11B	-0.433162	6.47078e-14	2.43542e-12
ENSG00000118898	PPL	0.494061	6.69018e-14	2.51216e-12
ENSG00000125257	ABCC4	-0.718522	7.27573e-14	2.72571e-12
ENSG00000074211	PPP2R2C	0.501237	7.60579e-14	2.84277e-12
ENSG00000169251	NMD3	-0.388052	7.77128e-14	2.89793e-12
ENSG00000182107	TMEM30B	-0.439318	7.86127e-14	2.91826e-12
ENSG00000162004	CCDC78	0.989449	7.86184e-14	2.91826e-12
ENSG00000172403	SYNPO2	-0.797099	8.23741e-14	3.05067e-12
ENSG00000112246	SIM1	-1.39693	8.71822e-14	3.22136e-12
ENSG00000139116	KIF21A	-0.451517	9.36075e-14	3.4509e-12
ENSG00000184154	LRTOMT	0.709125	9.52314e-14	3.50278e-12
ENSG00000254087	LYN	-0.688658	1.00073e-13	3.67253e-12
ENSG00000115594	IL1R1	-0.930555	1.03245e-13	3.78035e-12
ENSG00000101193	GID8	0.390987	1.09781e-13	4.01061e-12
ENSG00000102554	KLF5	-0.545502	1.13848e-13	4.1498e-12
ENSG00000144369	FAM171B	-0.585845	1.18543e-13	4.31125e-12
ENSG00000141736	ERBB2	0.487375	1.21234e-13	4.3992e-12
ENSG00000170345	FOS	-0.499616	1.30914e-13	4.73987e-12
ENSG00000100918	REC8	-1.08444	1.40922e-13	5.09081e-12
ENSG00000110375	UPK2	0.870418	1.47233e-13	5.30696e-12
ENSG00000119686	FLVCR2	0.593875	1.47844e-13	5.31712e-12
ENSG00000005884	ITGA3	0.454588	1.50987e-13	5.41813e-12
ENSG00000126903	SLC10A3	0.540282	1.51391e-13	5.42061e-12
ENSG00000172380	GNG12	-0.519219	1.55033e-13	5.53874e-12
ENSG00000176153	GPX2	-1.45179	1.55828e-13	5.55487e-12
ENSG00000162496	DHRS3	-0.828371	1.6635e-13	5.91693e-12
ENSG00000100311	PDGFB	0.638566	1.69588e-13	6.01888e-12
ENSG00000143390	RFX5	-0.474263	1.72093e-13	6.09444e-12
ENSG00000251574	RP11-6N13.1	1.4078	1.81375e-13	6.4091e-12
ENSG00000167515	TRAPPC2L	0.457785	1.864e-13	6.57234e-12
ENSG00000186417	GLDN	-0.664748	1.87111e-13	6.58304e-12
ENSG00000198054	DSCR8	1.51105	1.89619e-13	6.65681e-12
ENSG00000223573	TINCR	0.504232	2.02346e-13	7.08824e-12
ENSG00000168496	FEN1	0.477754	2.0784e-13	7.26499e-12
ENSG00000143149	ALDH9A1	0.488726	2.34489e-13	8.1788e-12
ENSG00000118985	ELL2	-0.659536	2.41756e-13	8.41416e-12
ENSG00000099337	KCNK6	0.537396	2.50104e-13	8.68602e-12
ENSG00000091039	OSBPL8	-0.464267	2.52239e-13	8.74139e-12
ENSG00000070081	NUCB2	0.492466	2.71883e-13	9.40206e-12
ENSG00000116191	RALGPS2	-0.468665	2.80025e-13	9.66296e-12
ENSG00000095739	BAMBI	-0.460167	2.86251e-13	9.85678e-12
ENSG00000007255	TRAPPC6A	0.68352	3.13096e-13	1.07583e-11
ENSG00000117226	GBP3	-1.31959	3.4009e-13	1.1661e-11
ENSG00000066382	MPPED2	-0.976085	3.54145e-13	1.21173e-11
ENSG00000069764	PLA2G10	-1.14187	3.59608e-13	1.22783e-11
ENSG00000119138	KLF9	-0.463009	3.68725e-13	1.25631e-11
ENSG00000155380	SLC16A1	-0.550499	3.80409e-13	1.29339e-11
ENSG00000164463	CREBRF	-0.624562	4.40824e-13	1.49566e-11
ENSG00000168758	SEMA4C	0.459065	4.45018e-13	1.50673e-11
ENSG00000134215	VAV3	-0.394323	4.59436e-13	1.5523e-11
ENSG00000058085	LAMC2	-0.680757	4.74796e-13	1.60085e-11
ENSG00000053108	FSTL4	0.932816	4.7976e-13	1.61423e-11
ENSG00000157388	CACNA1D	-0.685481	5.13241e-13	1.7233e-11
ENSG00000006327	TNFRSF12A	0.46973	5.19588e-13	1.741e-11
ENSG00000138078	PREPL	-0.427765	5.51584e-13	1.84439e-11
ENSG00000204267	TAP2	-0.892061	5.75871e-13	1.92163e-11
ENSG00000177606	JUN	-0.517039	5.78649e-13	1.92692e-11
ENSG00000003989	SLC7A2	0.382449	6.10868e-13	2.03004e-11
ENSG00000143774	GUK1	0.564583	6.96182e-13	2.30881e-11
ENSG00000187244	BCAM	0.549537	7.05812e-13	2.33596e-11
ENSG00000109861	CTSC	-0.566141	7.23947e-13	2.39109e-11
ENSG00000146540	C7orf50	0.530475	7.33247e-13	2.41688e-11
ENSG00000204950	LRRC10B	1.03022	7.40054e-13	2.43436e-11
ENSG00000241361	SLC25A24P1	-0.718637	7.55946e-13	2.48159e-11
ENSG00000175662	TOM1L2	0.49353	7.59493e-13	2.48819e-11
ENSG00000172197	MBOAT1	-0.558989	7.63737e-13	2.49703e-11
ENSG00000131981	LGALS3	-0.366766	7.9032e-13	2.57874e-11
ENSG00000162402	USP24	-0.476142	7.93767e-13	2.58477e-11
ENSG00000248527	MTATP6P1	0.443807	8.43602e-13	2.74154e-11
ENSG00000138095	LRPPRC	0.359667	8.52678e-13	2.76548e-11
ENSG00000068078	FGFR3	0.753472	9.02927e-13	2.9226e-11
ENSG00000068305	MEF2A	-0.452643	9.29284e-13	3.0019e-11
ENSG00000156795	WDYHV1	0.544682	9.40368e-13	3.03166e-11
ENSG00000171681	ATF7IP	-0.397773	1.00042e-12	3.21886e-11
ENSG00000197535	MYO5A	-0.536653	1.02826e-12	3.30184e-11
ENSG00000153933	DGKE	-0.484437	1.10482e-12	3.54069e-11
ENSG00000198315	ZKSCAN8	-0.521613	1.16058e-12	3.71201e-11
ENSG00000145147	SLIT2	-0.885134	1.16439e-12	3.71687e-11
ENSG00000152818	UTRN	-0.444168	1.1908e-12	3.78766e-11
ENSG00000050405	LIMA1	-0.447673	1.19125e-12	3.78766e-11
ENSG00000116406	EDEM3	-0.430308	1.22244e-12	3.87921e-11
ENSG00000214176	PLEKHM1P1	-0.558827	1.24291e-12	3.93644e-11
ENSG00000181449	SOX2	-0.750443	1.26367e-12	3.99439e-11
ENSG00000089220	PEBP1	0.355721	1.28457e-12	4.05253e-11
ENSG00000172432	GTPBP2	-0.407541	1.41153e-12	4.44439e-11
ENSG00000205155	PSENEN	0.704395	1.44768e-12	4.54935e-11
ENSG00000163235	TGFA	-0.656274	1.46912e-12	4.59997e-11
ENSG00000073712	FERMT2	-0.441608	1.46947e-12	4.59997e-11
ENSG00000164124	TMEM144	-0.739409	1.47506e-12	4.60857e-11
ENSG00000085491	SLC25A24	-0.37356	1.50753e-12	4.70093e-11
ENSG00000166681	BEX3	0.460332	1.70777e-12	5.3151e-11
ENSG00000105699	LSR	0.481165	1.71382e-12	5.32371e-11
ENSG00000196743	GM2A	0.58317	1.76333e-12	5.467e-11
ENSG00000052795	FNIP2	-0.665969	1.8448e-12	5.70864e-11
ENSG00000115648	MLPH	-0.344476	1.88834e-12	5.83225e-11
ENSG00000171992	SYNPO	1.15017	1.91092e-12	5.89072e-11
ENSG00000118257	NRP2	-1.33354	2.2165e-12	6.81974e-11
ENSG00000143933	CALM2	0.48914	2.22928e-12	6.83684e-11
ENSG00000183049	CAMK1D	0.763733	2.23051e-12	6.83684e-11
ENSG00000159423	ALDH4A1	0.734439	2.34389e-12	7.17081e-11
ENSG00000150961	SEC24D	-0.566416	2.38706e-12	7.28908e-11
ENSG00000109046	WSB1	-0.3985	2.44438e-12	7.45007e-11
ENSG00000162639	HENMT1	0.470227	2.496e-12	7.59309e-11
ENSG00000176058	TPRN	0.573425	2.5192e-12	7.64929e-11
ENSG00000101057	MYBL2	0.448408	2.56561e-12	7.77562e-11
ENSG00000111052	LIN7A	0.519447	2.60804e-12	7.88943e-11
ENSG00000173210	ABLIM3	0.519534	2.73401e-12	8.25508e-11
ENSG00000124126	PREX1	0.40633	2.88935e-12	8.70788e-11
ENSG00000177700	POLR2L	0.766322	2.97712e-12	8.95572e-11
ENSG00000261116	RP3-523K23.2	0.536372	2.98684e-12	8.96827e-11
ENSG00000103404	USP31	-0.529271	3.08813e-12	9.25524e-11
ENSG00000135679	MDM2	-0.415036	3.19279e-12	9.55121e-11
ENSG00000100625	SIX4	-0.530386	3.25359e-12	9.71515e-11
ENSG00000101974	ATP11C	-0.458265	3.2748e-12	9.76048e-11
ENSG00000185896	LAMP1	0.409318	3.3423e-12	9.94335e-11
ENSG00000103507	BCKDK	0.588743	3.45456e-12	1.02585e-10
ENSG00000066279	ASPM	-0.410999	3.5878e-12	1.06346e-10
ENSG00000115267	IFIH1	-0.621523	3.68798e-12	1.09116e-10
ENSG00000173156	RHOD	0.609528	3.71534e-12	1.09725e-10
ENSG00000107223	EDF1	0.37567	3.7664e-12	1.1103e-10
ENSG00000124145	SDC4	0.357772	3.85356e-12	1.13203e-10
ENSG00000071553	ATP6AP1	0.377392	3.85412e-12	1.13203e-10
ENSG00000122679	RAMP3	-0.545214	3.92653e-12	1.15121e-10
ENSG00000114353	GNAI2	0.45595	4.1137e-12	1.20391e-10
ENSG00000102393	GLA	-0.480636	4.15995e-12	1.21525e-10
ENSG00000203685	STUM	-0.835065	4.39768e-12	1.28238e-10
ENSG00000164506	STXBP5	-0.439265	4.43687e-12	1.29148e-10
ENSG00000243955	GSTA1	-1.42528	4.46051e-12	1.29603e-10
ENSG00000242485	MRPL20	0.477664	4.82319e-12	1.3989e-10
ENSG00000177728	TMEM94	-0.576518	4.92839e-12	1.42685e-10
ENSG00000137628	DDX60	-1.30691	4.99803e-12	1.44443e-10
ENSG00000157107	FCHO2	-0.557875	5.10145e-12	1.47169e-10
ENSG00000213928	IRF9	-1.104	5.47911e-12	1.57783e-10
ENSG00000013588	GPRC5A	-0.409609	5.80861e-12	1.66974e-10
ENSG00000231574	LINC02015	-1.41524	6.08581e-12	1.74633e-10
ENSG00000084710	EFR3B	0.666131	6.91237e-12	1.98e-10
ENSG00000197308	GATA3-AS1	0.538576	7.30685e-12	2.0893e-10
ENSG00000249364	RP11-434D9.1	-0.625401	7.37225e-12	2.10428e-10
ENSG00000105520	PLPPR2	0.563018	7.40555e-12	2.11006e-10
ENSG00000131711	MAP1B	-0.776733	7.8513e-12	2.23313e-10
ENSG00000166225	FRS2	-0.486911	7.9442e-12	2.2556e-10
ENSG00000160932	LY6E	0.468234	8.29554e-12	2.35123e-10
ENSG00000131242	RAB11FIP4	0.518269	8.40407e-12	2.37782e-10
ENSG00000162836	ACP6	-0.4288	8.51469e-12	2.40492e-10
ENSG00000026103	FAS	-0.863238	8.55812e-12	2.41297e-10
ENSG00000064115	TM7SF3	-0.42865	8.77096e-12	2.46868e-10
ENSG00000039650	PNKP	0.535866	8.95414e-12	2.51586e-10
ENSG00000162601	MYSM1	-0.439197	9.10525e-12	2.55389e-10
ENSG00000136155	SCEL	-1.12587	9.45005e-12	2.64602e-10
ENSG00000180354	MTURN	-0.534699	9.95863e-12	2.7836e-10
ENSG00000188994	ZNF292	-0.458233	1.02763e-11	2.86744e-10
ENSG00000167123	CERCAM	0.551052	1.0502e-11	2.92538e-10
ENSG00000101850	GPR143	0.576406	1.06356e-11	2.9575e-10
ENSG00000129566	TEP1	-0.458573	1.09004e-11	3.02594e-10
ENSG00000069493	CLEC2D	0.69459	1.21106e-11	3.35612e-10
ENSG00000164742	ADCY1	-0.375854	1.22124e-11	3.37855e-10
ENSG00000066926	FECH	0.548882	1.22705e-11	3.38885e-10
ENSG00000079462	PAFAH1B3	0.568252	1.24421e-11	3.43038e-10
ENSG00000141959	PFKL	0.444772	1.24752e-11	3.43366e-10
ENSG00000188176	SMTNL2	1.04586	1.25938e-11	3.45956e-10
ENSG00000110719	TCIRG1	0.660703	1.26121e-11	3.45956e-10
ENSG00000146834	MEPCE	0.426418	1.26902e-11	3.47509e-10
ENSG00000117983	MUC5B	-1.04878	1.28702e-11	3.51843e-10
ENSG00000188647	PTAR1	-0.493534	1.30925e-11	3.57316e-10
ENSG00000039319	ZFYVE16	-0.463668	1.33586e-11	3.63966e-10
ENSG00000173486	FKBP2	0.584833	1.36063e-11	3.70092e-10
ENSG00000108654	DDX5	-0.300799	1.38716e-11	3.76673e-10
ENSG00000095015	MAP3K1	-0.376541	1.40171e-11	3.794e-10
ENSG00000184428	TOP1MT	0.480675	1.40188e-11	3.794e-10
ENSG00000052723	SIKE1	-0.385624	1.54751e-11	4.18111e-10
ENSG00000177239	MAN1B1	0.400677	1.55215e-11	4.18666e-10
ENSG00000181085	MAPK15	0.949626	1.56597e-11	4.21693e-10
ENSG00000249346	LINC01016	-0.890543	1.58253e-11	4.25443e-10
ENSG00000260337	RP11-386M24.6	-1.05951	1.58519e-11	4.25453e-10
ENSG00000141337	ARSG	0.538309	1.5958e-11	4.27589e-10
ENSG00000165029	ABCA1	-0.613021	1.60159e-11	4.28431e-10
ENSG00000013563	DNASE1L1	0.459934	1.811e-11	4.8365e-10
ENSG00000170017	ALCAM	-0.436708	1.89551e-11	5.05386e-10
ENSG00000185658	BRWD1	-0.343204	1.97126e-11	5.24719e-10
ENSG00000196230	TUBB	0.422567	1.99836e-11	5.31059e-10
ENSG00000196781	TLE1	0.441531	2.02112e-11	5.36227e-10
ENSG00000198399	ITSN2	-0.437138	2.17174e-11	5.75244e-10
ENSG00000159399	HK2	-0.496353	2.32294e-11	6.14267e-10
ENSG00000161999	JMJD8	0.483287	2.32665e-11	6.14267e-10
ENSG00000067066	SP100	-0.536028	2.33164e-11	6.1458e-10
ENSG00000083097	DOPEY1	-0.444887	2.36495e-11	6.22244e-10
ENSG00000106367	AP1S1	0.382352	2.3684e-11	6.22244e-10
ENSG00000118707	TGIF2	0.42798	2.50017e-11	6.55798e-10
ENSG00000111962	UST	-0.725336	2.58249e-11	6.76295e-10
ENSG00000161011	SQSTM1	-0.344875	2.68911e-11	7.03078e-10
ENSG00000102401	ARMCX3	-0.41136	2.90968e-11	7.59521e-10
ENSG00000148344	PTGES	0.99647	3.02565e-11	7.88519e-10
ENSG00000155906	RMND1	0.44416	3.13517e-11	8.15749e-10
ENSG00000134595	SOX3	0.785755	3.33693e-11	8.66852e-10
ENSG00000073331	ALPK1	-0.565372	3.37254e-11	8.747e-10
ENSG00000002586	CD99	0.453338	3.54048e-11	9.16786e-10
ENSG00000277075	HIST1H2AE	0.888214	3.56095e-11	9.20614e-10
ENSG00000107331	ABCA2	0.411983	3.57072e-11	9.21666e-10
ENSG00000125148	MT2A	0.570788	3.68182e-11	9.48831e-10
ENSG00000006831	ADIPOR2	0.385899	3.80134e-11	9.78074e-10
ENSG00000136144	RCBTB1	-0.569812	3.86675e-11	9.92447e-10
ENSG00000147394	ZNF185	0.362961	3.86946e-11	9.92447e-10
ENSG00000074370	ATP2A3	0.433386	3.97736e-11	1.01851e-09
ENSG00000222041	CYTOR	0.938699	4.00704e-11	1.02449e-09
ENSG00000128872	TMOD2	-0.84419	4.15002e-11	1.05937e-09
ENSG00000274173	RP4-568C11.4	-0.482193	4.34691e-11	1.10788e-09
ENSG00000076248	UNG	0.379923	4.70903e-11	1.19829e-09
ENSG00000116857	TMEM9	0.392106	4.76087e-11	1.20957e-09
ENSG00000198804	MT-CO1	0.310112	4.92616e-11	1.24961e-09
ENSG00000042753	AP2S1	0.441589	5.26872e-11	1.33441e-09
ENSG00000019549	SNAI2	-1.13368	5.29255e-11	1.33835e-09
ENSG00000141510	TP53	0.340253	5.38845e-11	1.36048e-09
ENSG00000104529	EEF1D	0.354559	5.42405e-11	1.36733e-09
ENSG00000070778	PTPN21	0.562454	5.57506e-11	1.40321e-09
ENSG00000006016	CRLF1	0.990559	5.68635e-11	1.429e-09
ENSG00000171798	KNDC1	0.690181	5.84199e-11	1.46422e-09
ENSG00000163659	TIPARP	-0.423822	5.84457e-11	1.46422e-09
ENSG00000141449	GREB1L	-0.529448	6.12258e-11	1.5315e-09
ENSG00000130202	NECTIN2	0.443009	6.22855e-11	1.55454e-09
ENSG00000140836	ZFHX3	-0.446432	6.23391e-11	1.55454e-09
ENSG00000104626	ERI1	-0.494777	6.515e-11	1.62214e-09
ENSG00000104419	NDRG1	-0.446606	6.54774e-11	1.62778e-09
ENSG00000196405	EVL	0.333241	6.67979e-11	1.65806e-09
ENSG00000076770	MBNL3	-0.536619	6.97131e-11	1.72777e-09
ENSG00000104783	KCNN4	0.598987	7.37921e-11	1.82607e-09
ENSG00000075426	FOSL2	-0.360269	7.95887e-11	1.96651e-09
ENSG00000127838	PNKD	0.394679	7.98397e-11	1.96775e-09
ENSG00000054277	OPN3	0.618877	7.98821e-11	1.96775e-09
ENSG00000198786	MT-ND5	0.326007	8.42791e-11	2.07291e-09
ENSG00000170525	PFKFB3	-0.377544	8.56192e-11	2.10267e-09
ENSG00000196865	NHLRC2	-0.456533	9.1416e-11	2.24163e-09
ENSG00000166147	FBN1	-0.972168	9.27004e-11	2.26969e-09
ENSG00000142089	IFITM3	0.434178	9.59357e-11	2.34535e-09
ENSG00000188486	H2AFX	0.387722	9.99628e-11	2.44012e-09
ENSG00000157224	CLDN12	-0.489402	1.08976e-10	2.65613e-09
ENSG00000124493	GRM4	0.799876	1.21458e-10	2.95592e-09
ENSG00000164062	APEH	0.482225	1.27998e-10	3.11039e-09
ENSG00000170653	ATF7	-0.434438	1.32422e-10	3.21307e-09
ENSG00000054179	ENTPD2	0.907799	1.36487e-10	3.30674e-09
ENSG00000128487	SPECC1	0.397716	1.4777e-10	3.57474e-09
ENSG00000115255	REEP6	0.81805	1.548e-10	3.73922e-09
ENSG00000137216	TMEM63B	0.437119	1.56706e-10	3.77962e-09
ENSG00000206560	ANKRD28	-0.361477	1.58427e-10	3.81545e-09
ENSG00000106723	SPIN1	-0.354987	1.60046e-10	3.84872e-09
ENSG00000116133	DHCR24	0.400379	1.60751e-10	3.85993e-09
ENSG00000082781	ITGB5	0.472306	1.65828e-10	3.97595e-09
ENSG00000129595	EPB41L4A	-0.729401	1.67051e-10	3.99935e-09
ENSG00000187123	LYPD6	-0.401786	1.72087e-10	4.11382e-09
ENSG00000198853	RUSC2	0.743748	1.742e-10	4.15818e-09
ENSG00000008086	CDKL5	-0.640802	1.81947e-10	4.33671e-09
ENSG00000163932	PRKCD	-0.373964	1.83213e-10	4.36047e-09
ENSG00000125848	FLRT3	-0.789299	1.83737e-10	4.36651e-09
ENSG00000114166	KAT2B	-0.45459	1.86192e-10	4.41838e-09
ENSG00000103260	METRN	0.516337	1.93666e-10	4.589e-09
ENSG00000134107	BHLHE40	-0.386917	1.9907e-10	4.71016e-09
ENSG00000096696	DSP	0.377633	2.0375e-10	4.81386e-09
ENSG00000211891	IGHE	-0.930883	2.08985e-10	4.93034e-09
ENSG00000213694	S1PR3	0.65956	2.10163e-10	4.95091e-09
ENSG00000172428	COPS9	0.571491	2.12461e-10	4.99778e-09
ENSG00000111669	TPI1	0.331416	2.13053e-10	5.00442e-09
ENSG00000116254	CHD5	0.8226	2.20609e-10	5.1744e-09
ENSG00000074071	MRPS34	0.458715	2.22307e-10	5.20668e-09
ENSG00000161813	LARP4	-0.372947	2.27231e-10	5.31431e-09
ENSG00000204220	PFDN6	0.494366	2.28859e-10	5.34467e-09
ENSG00000112514	CUTA	0.394814	2.32052e-10	5.41142e-09
ENSG00000143653	SCCPDH	0.33842	2.46192e-10	5.73291e-09
ENSG00000147180	ZNF711	-0.978566	2.58845e-10	6.01888e-09
ENSG00000197461	PDGFA	0.535045	2.7417e-10	6.36609e-09
ENSG00000129422	MTUS1	-0.385716	2.77538e-10	6.43506e-09
ENSG00000136997	MYC	-0.337666	2.84997e-10	6.59856e-09
ENSG00000005448	WDR54	0.504855	2.90867e-10	6.72483e-09
ENSG00000147400	CETN2	0.384989	3.10235e-10	7.1624e-09
ENSG00000129993	CBFA2T3	0.420841	3.13639e-10	7.23067e-09
ENSG00000164327	RICTOR	-0.452893	3.20961e-10	7.38895e-09
ENSG00000092841	MYL6	0.321477	3.21711e-10	7.39569e-09
ENSG00000142149	HUNK	0.847007	3.28719e-10	7.54609e-09
ENSG00000144485	HES6	0.767026	3.3582e-10	7.69818e-09
ENSG00000125445	MRPS7	0.412485	3.46133e-10	7.92337e-09
ENSG00000006282	SPATA20	0.467698	3.47417e-10	7.94153e-09
ENSG00000154099	DNAAF1	0.664365	3.49814e-10	7.98503e-09
ENSG00000167880	EVPL	0.493072	3.50474e-10	7.98884e-09
ENSG00000180881	CAPS2	-0.850325	3.51474e-10	8.00035e-09
ENSG00000023287	RB1CC1	-0.342998	3.62102e-10	8.23071e-09
ENSG00000105698	USF2	0.378023	3.68823e-10	8.3717e-09
ENSG00000188313	PLSCR1	-0.466964	3.72002e-10	8.43205e-09
ENSG00000153094	BCL2L11	0.370962	3.77869e-10	8.55304e-09
ENSG00000124664	SPDEF	-0.610389	3.97117e-10	8.97618e-09
ENSG00000149289	ZC3H12C	-0.76984	3.98973e-10	9.00555e-09
ENSG00000170892	TSEN34	0.494804	4.04262e-10	9.11222e-09
ENSG00000068615	REEP1	0.971138	4.05176e-10	9.12012e-09
ENSG00000198478	SH3BGRL2	-0.473696	4.15026e-10	9.32886e-09
ENSG00000013306	SLC25A39	0.38373	4.26273e-10	9.56837e-09
ENSG00000142235	LMTK3	0.798688	4.44826e-10	9.97099e-09
ENSG00000103145	HCFC1R1	0.653085	4.48605e-10	1.00418e-08
ENSG00000110651	CD81	0.386387	4.52595e-10	1.01171e-08
ENSG00000136379	ABHD17C	-0.454462	4.72345e-10	1.0544e-08
ENSG00000136854	STXBP1	0.555986	4.74637e-10	1.05806e-08
ENSG00000091844	RGS17	-0.557461	4.82905e-10	1.07501e-08
ENSG00000050820	BCAR1	0.516559	5.14448e-10	1.14366e-08
ENSG00000122378	FAM213A	0.463846	5.2128e-10	1.15726e-08
ENSG00000074935	TUBE1	-0.451338	5.23404e-10	1.16038e-08
ENSG00000163993	S100P	-0.455289	5.25968e-10	1.16447e-08
ENSG00000196247	ZNF107	-0.424415	5.33826e-10	1.18025e-08
ENSG00000145808	ADAMTS19	-0.418512	5.43408e-10	1.1998e-08
ENSG00000166503	RP11-382A20.3	0.40648	5.55266e-10	1.22431e-08
ENSG00000106258	CYP3A5	-1.27634	5.56403e-10	1.22515e-08
ENSG00000126432	PRDX5	0.376114	5.69263e-10	1.25176e-08
ENSG00000198265	HELZ	-0.353205	5.7629e-10	1.26549e-08
ENSG00000119922	IFIT2	-1.14869	5.82673e-10	1.27777e-08
ENSG00000100417	PMM1	0.564545	5.86007e-10	1.28335e-08
ENSG00000134668	SPOCD1	-0.957041	6.03291e-10	1.31941e-08
ENSG00000254999	BRK1	0.32106	6.12601e-10	1.33797e-08
ENSG00000167930	FAM234A	0.465847	6.21178e-10	1.35487e-08
ENSG00000134852	CLOCK	-0.386354	6.29016e-10	1.37012e-08
ENSG00000197837	HIST4H4	-0.80549	6.36838e-10	1.38529e-08
ENSG00000122641	INHBA	-1.25281	6.43546e-10	1.39801e-08
ENSG00000168769	TET2	-0.361107	6.65109e-10	1.44291e-08
ENSG00000123104	ITPR2	-0.467672	6.71637e-10	1.45512e-08
ENSG00000197249	SERPINA1	-0.58946	6.92383e-10	1.49807e-08
ENSG00000127954	STEAP4	-1.16228	7.00602e-10	1.51382e-08
ENSG00000125520	SLC2A4RG	0.420164	7.02052e-10	1.51493e-08
ENSG00000175334	BANF1	0.366627	7.16518e-10	1.54409e-08
ENSG00000175550	DRAP1	0.436554	7.37384e-10	1.58694e-08
ENSG00000159208	CIART	-0.518917	7.6371e-10	1.64142e-08
ENSG00000136908	DPM2	-0.391385	7.68485e-10	1.64747e-08
ENSG00000147813	NAPRT	0.520308	7.68562e-10	1.64747e-08
ENSG00000112062	MAPK14	-0.409924	7.70561e-10	1.64957e-08
ENSG00000119729	RHOQ	-0.46735	7.72664e-10	1.6517e-08
ENSG00000077232	DNAJC10	-0.346945	7.73599e-10	1.6517e-08
ENSG00000188229	TUBB4B	0.331616	7.78077e-10	1.65908e-08
ENSG00000112655	PTK7	0.486099	7.95541e-10	1.69408e-08
ENSG00000152558	TMEM123	-0.399991	8.00472e-10	1.70234e-08
ENSG00000189108	IL1RAPL2	-1.25717	8.27159e-10	1.75679e-08
ENSG00000051523	CYBA	0.534722	8.29157e-10	1.75872e-08
ENSG00000135968	GCC2	-0.400802	8.46328e-10	1.7928e-08
ENSG00000123636	BAZ2B	-0.397861	8.47449e-10	1.79282e-08
ENSG00000065833	ME1	-0.423192	8.60114e-10	1.81724e-08
ENSG00000161671	EMC10	0.424464	8.67691e-10	1.83086e-08
ENSG00000139055	ERP27	-1.03112	8.87001e-10	1.86917e-08
ENSG00000078900	TP73	0.651694	9.03271e-10	1.90098e-08
ENSG00000196878	LAMB3	-0.786449	9.26522e-10	1.94738e-08
ENSG00000168090	COPS6	0.35098	9.48831e-10	1.99168e-08
ENSG00000076003	MCM6	0.330663	9.87016e-10	2.06915e-08
ENSG00000105281	SLC1A5	0.31154	1.02517e-09	2.14377e-08
ENSG00000134909	ARHGAP32	-0.441412	1.02526e-09	2.14377e-08
ENSG00000008382	MPND	0.55519	1.05661e-09	2.20648e-08
ENSG00000100029	PES1	0.394696	1.16747e-09	2.43484e-08
ENSG00000106688	SLC1A1	1.08561	1.18993e-09	2.47848e-08
ENSG00000181192	DHTKD1	0.385313	1.22242e-09	2.54288e-08
ENSG00000135116	HRK	-0.698081	1.23345e-09	2.56253e-08
ENSG00000130038	CRACR2A	-0.884001	1.27673e-09	2.64779e-08
ENSG00000116584	ARHGEF2	0.580747	1.27776e-09	2.64779e-08
ENSG00000119547	ONECUT2	-0.57327	1.3017e-09	2.69395e-08
ENSG00000147140	NONO	0.289863	1.31104e-09	2.70981e-08
ENSG00000100346	CACNA1I	-0.643765	1.33447e-09	2.75073e-08
ENSG00000099385	BCL7C	0.49273	1.33514e-09	2.75073e-08
ENSG00000153395	LPCAT1	0.325977	1.33593e-09	2.75073e-08
ENSG00000174669	SLC29A2	0.513131	1.35322e-09	2.78279e-08
ENSG00000197448	GSTK1	0.36954	1.37382e-09	2.82156e-08
ENSG00000183684	ALYREF	0.410709	1.37693e-09	2.82436e-08
ENSG00000107796	ACTA2	-0.827443	1.472e-09	3.01555e-08
ENSG00000181827	RFX7	-0.491166	1.51215e-09	3.09389e-08
ENSG00000104805	NUCB1	0.394815	1.51917e-09	3.10254e-08
ENSG00000116017	ARID3A	0.550245	1.52022e-09	3.10254e-08
ENSG00000168610	STAT3	-0.423972	1.52777e-09	3.11404e-08
ENSG00000115548	KDM3A	-0.362795	1.55077e-09	3.15694e-08
ENSG00000224984	RP11-524H19.2	0.622476	1.57079e-09	3.19367e-08
ENSG00000211448	DIO2	-1.18095	1.57306e-09	3.19427e-08
ENSG00000224559	LINC01087	-0.688889	1.60727e-09	3.25966e-08
ENSG00000198677	TTC37	-0.406065	1.68258e-09	3.40812e-08
ENSG00000106038	EVX1	-1.23792	1.75011e-09	3.54048e-08
ENSG00000179627	ZBTB42	0.529687	1.76108e-09	3.55821e-08
ENSG00000119630	PGF	1.20597	1.78914e-09	3.6104e-08
ENSG00000099624	ATP5D	0.559259	1.90289e-09	3.83516e-08
ENSG00000176597	B3GNT5	-0.561204	1.91771e-09	3.85788e-08
ENSG00000140199	SLC12A6	-0.503742	1.91893e-09	3.85788e-08
ENSG00000173276	ZBTB21	-0.427794	1.95914e-09	3.93383e-08
ENSG00000008018	PSMB1	0.306111	2.06173e-09	4.13082e-08
ENSG00000149923	PPP4C	0.348817	2.06235e-09	4.13082e-08
ENSG00000103266	STUB1	0.476451	2.08477e-09	4.17057e-08
ENSG00000174871	CNIH2	0.914921	2.08765e-09	4.17118e-08
ENSG00000116833	NR5A2	-0.95838	2.12659e-09	4.24375e-08
ENSG00000138356	AOX1	-1.10904	2.13833e-09	4.26191e-08
ENSG00000124766	SOX4	-0.378315	2.14922e-09	4.27835e-08
ENSG00000155313	USP25	-0.353084	2.18108e-09	4.33643e-08
ENSG00000197774	EME2	0.485981	2.18987e-09	4.34857e-08
ENSG00000113742	CPEB4	-0.609942	2.24979e-09	4.46208e-08
ENSG00000085224	ATRX	-0.324299	2.27794e-09	4.51239e-08
ENSG00000069812	HES2	1.01181	2.30073e-09	4.55196e-08
ENSG00000183808	RBM12B	-0.379253	2.36917e-09	4.68165e-08
ENSG00000250644	RP11-295K3.1	-0.685184	2.40055e-09	4.73786e-08
ENSG00000131389	SLC6A6	-0.364645	2.43575e-09	4.80148e-08
ENSG00000169919	GUSB	0.374782	2.47398e-09	4.87091e-08
ENSG00000189077	TMEM120A	0.524712	2.50307e-09	4.92219e-08
ENSG00000041353	RAB27B	-0.39483	2.51385e-09	4.9374e-08
ENSG00000211455	STK38L	-0.411179	2.55378e-09	5.00974e-08
ENSG00000163590	PPM1L	-0.532709	2.60619e-09	5.10636e-08
ENSG00000072364	AFF4	-0.339575	2.65409e-09	5.19393e-08
ENSG00000101213	PTK6	0.53187	2.66063e-09	5.20044e-08
ENSG00000270344	POC1B-AS1	-0.68814	2.70895e-09	5.28849e-08
ENSG00000146242	TPBG	-0.304528	2.72718e-09	5.31766e-08
ENSG00000168350	DEGS2	0.724859	2.85969e-09	5.56933e-08
ENSG00000099812	MISP	0.372831	2.94895e-09	5.73628e-08
ENSG00000078018	MAP2	-0.493405	2.97327e-09	5.77664e-08
ENSG00000145916	RMND5B	0.341508	2.98049e-09	5.78203e-08
ENSG00000224186	C5orf66	-0.89415	2.98319e-09	5.78203e-08
ENSG00000087510	TFAP2C	0.310021	3.08881e-09	5.97958e-08
ENSG00000167740	CYB5D2	0.523097	3.12587e-09	6.0441e-08
ENSG00000272341	RP1-151F17.2	-0.594014	3.24113e-09	6.25949e-08
ENSG00000173511	VEGFB	0.501798	3.26759e-09	6.29936e-08
ENSG00000153113	CAST	-0.331672	3.26957e-09	6.29936e-08
ENSG00000162702	ZNF281	-0.445529	3.2878e-09	6.32696e-08
ENSG00000179029	TMEM107	0.580088	3.34996e-09	6.43892e-08
ENSG00000110195	FOLR1	0.991865	3.36189e-09	6.45418e-08
ENSG00000118596	SLC16A7	-0.451501	3.37855e-09	6.47849e-08
ENSG00000004961	HCCS	0.498431	3.43323e-09	6.57556e-08
ENSG00000177697	CD151	0.39108	3.44921e-09	6.59836e-08
ENSG00000105329	TGFB1	0.658092	3.47271e-09	6.63547e-08
ENSG00000135338	LCA5	-0.925282	3.48415e-09	6.64947e-08
ENSG00000158373	HIST1H2BD	0.580488	3.50011e-09	6.67205e-08
ENSG00000177888	ZBTB41	-0.478732	3.50845e-09	6.6801e-08
ENSG00000075420	FNDC3B	-0.438982	3.57391e-09	6.79672e-08
ENSG00000168763	CNNM3	0.424539	3.57875e-09	6.79794e-08
ENSG00000132554	RGS22	0.886004	3.69504e-09	7.01061e-08
ENSG00000165731	RET	0.37031	3.71705e-09	7.04412e-08
ENSG00000243566	UPK3B	-0.723678	3.77784e-09	7.15095e-08
ENSG00000099817	POLR2E	0.43002	3.80038e-09	7.1852e-08
ENSG00000188191	PRKAR1B	0.601408	3.86547e-09	7.29974e-08
ENSG00000051108	HERPUD1	-0.358448	3.99518e-09	7.5359e-08
ENSG00000163191	S100A11	0.288846	4.12023e-09	7.76272e-08
ENSG00000160551	TAOK1	-0.354082	4.25484e-09	8.00701e-08
ENSG00000168386	FILIP1L	-0.677324	4.2657e-09	8.01813e-08
ENSG00000268996	MAN1B1-AS1	0.900597	4.29646e-09	8.06658e-08
ENSG00000184162	NR2C2AP	0.423462	4.3078e-09	8.0785e-08
ENSG00000026297	RNASET2	0.465001	4.41081e-09	8.26209e-08
ENSG00000182180	MRPS16	0.392365	4.45656e-09	8.33816e-08
ENSG00000182621	PLCB1	-0.420462	4.56118e-09	8.52404e-08
ENSG00000104267	CA2	-0.379635	4.659e-09	8.6968e-08
ENSG00000267519	CTD-3252C9.4	0.669555	4.94939e-09	9.22821e-08
ENSG00000170153	RNF150	0.585548	5.30373e-09	9.87751e-08
ENSG00000189057	FAM111B	0.457788	5.38227e-09	1.00123e-07
ENSG00000158292	GPR153	0.715862	5.46706e-09	1.01583e-07
ENSG00000124788	ATXN1	-0.349998	5.55556e-09	1.03109e-07
ENSG00000057252	SOAT1	-0.481281	5.61129e-09	1.04024e-07
ENSG00000149636	DSN1	0.411081	5.64855e-09	1.04595e-07
ENSG00000007384	RHBDF1	0.397606	5.71578e-09	1.05719e-07
ENSG00000253125	RP11-459E5.1	0.528521	5.84779e-09	1.08037e-07
ENSG00000112697	TMEM30A	-0.3438	5.86345e-09	1.08089e-07
ENSG00000078177	N4BP2	-0.436893	5.86394e-09	1.08089e-07
ENSG00000175643	RMI2	0.377913	5.97677e-09	1.10043e-07
ENSG00000142173	COL6A2	0.758237	6.10371e-09	1.12253e-07
ENSG00000057657	PRDM1	-1.17756	6.18473e-09	1.13614e-07
ENSG00000111321	LTBR	-0.311899	6.20641e-09	1.13883e-07
ENSG00000144645	OSBPL10	0.451699	6.24982e-09	1.14549e-07
ENSG00000074696	HACD3	0.326754	6.3497e-09	1.16248e-07
ENSG00000145050	MANF	0.445475	6.46546e-09	1.18234e-07
ENSG00000168894	RNF181	0.370926	6.57735e-09	1.20144e-07
ENSG00000213281	NRAS	-0.315346	6.60807e-09	1.20569e-07
ENSG00000170442	KRT86	-0.82608	6.68223e-09	1.21785e-07
ENSG00000104904	OAZ1	0.336129	6.7155e-09	1.22254e-07
ENSG00000185187	SIGIRR	0.51446	6.82307e-09	1.24073e-07
ENSG00000165502	RPL36AL	0.337338	7.03268e-09	1.2772e-07
ENSG00000231131	LINC01468	0.489819	7.03942e-09	1.2772e-07
ENSG00000138271	GPR87	-0.480259	7.0812e-09	1.28334e-07
ENSG00000223745	CCDC18-AS1	-0.424042	7.11455e-09	1.28794e-07
ENSG00000237423	LINC01522	-0.962695	7.59693e-09	1.37373e-07
ENSG00000100201	DDX17	-0.293288	7.65778e-09	1.38319e-07
ENSG00000128881	TTBK2	-0.563635	7.6841e-09	1.38639e-07
ENSG00000177189	RPS6KA3	-0.359502	7.79072e-09	1.40406e-07
ENSG00000172531	PPP1CA	0.340725	7.89798e-09	1.4209e-07
ENSG00000123416	TUBA1B	0.298842	7.90167e-09	1.4209e-07
ENSG00000108021	FAM208B	-0.30542	7.94742e-09	1.42754e-07
ENSG00000131462	TUBG1	0.45729	7.96229e-09	1.42862e-07
ENSG00000108528	SLC25A11	0.425155	8.04416e-09	1.44171e-07
ENSG00000182749	PAQR7	0.67716	8.12025e-09	1.45374e-07
ENSG00000102996	MMP15	0.512948	8.15386e-09	1.45814e-07
ENSG00000117461	PIK3R3	-0.337869	8.40635e-09	1.50164e-07
ENSG00000243244	STON1	0.982844	8.63678e-09	1.5411e-07
ENSG00000145623	OSMR	-0.602771	8.94947e-09	1.59513e-07
ENSG00000158406	HIST1H4H	0.456096	8.97736e-09	1.59835e-07
ENSG00000099797	TECR	0.412841	9.03492e-09	1.60683e-07
ENSG00000180008	SOCS4	-0.406067	9.12187e-09	1.62051e-07
ENSG00000151632	AKR1C2	-0.450248	9.25256e-09	1.64192e-07
ENSG00000079156	OSBPL6	0.57755	9.29863e-09	1.64829e-07
ENSG00000129353	SLC44A2	0.325943	9.34239e-09	1.65424e-07
ENSG00000176853	FAM91A1	-0.340079	9.42513e-09	1.66706e-07
ENSG00000127483	HP1BP3	-0.29955	9.58163e-09	1.69289e-07
ENSG00000156218	ADAMTSL3	-0.794371	9.91689e-09	1.75022e-07
ENSG00000160606	TLCD1	0.676972	9.9293e-09	1.7505e-07
ENSG00000178209	PLEC	0.442403	9.95368e-09	1.75289e-07
ENSG00000189007	ADAT2	-0.629178	1.00305e-08	1.7645e-07
ENSG00000162989	KCNJ3	0.390051	1.01188e-08	1.77809e-07
ENSG00000267100	ILF3-AS1	0.440612	1.05494e-08	1.85175e-07
ENSG00000167900	TK1	0.36461	1.09098e-08	1.91294e-07
ENSG00000221968	FADS3	0.552582	1.10341e-08	1.93264e-07
ENSG00000198258	UBL5	0.443729	1.11141e-08	1.94293e-07
ENSG00000115020	PIKFYVE	-0.391347	1.11168e-08	1.94293e-07
ENSG00000213676	ATF6B	0.371093	1.11904e-08	1.95367e-07
ENSG00000152056	AP1S3	-0.79434	1.15841e-08	2.02023e-07
ENSG00000184363	PKP3	0.436116	1.21612e-08	2.11859e-07
ENSG00000053747	LAMA3	-0.491784	1.2623e-08	2.19667e-07
ENSG00000181381	DDX60L	-1.03855	1.27416e-08	2.21493e-07
ENSG00000161905	ALOX15	0.607606	1.28039e-08	2.22337e-07
ENSG00000153310	FAM49B	0.309784	1.2825e-08	2.22465e-07
ENSG00000130770	ATPIF1	0.354121	1.30392e-08	2.25938e-07
ENSG00000103202	NME4	0.412878	1.35878e-08	2.35193e-07
ENSG00000147164	SNX12	-0.375534	1.37677e-08	2.38052e-07
ENSG00000135446	CDK4	0.315753	1.38154e-08	2.38622e-07
ENSG00000101665	SMAD7	0.571795	1.40208e-08	2.4191e-07
ENSG00000164932	CTHRC1	0.972422	1.40447e-08	2.42066e-07
ENSG00000156011	PSD3	-0.431977	1.40772e-08	2.42367e-07
ENSG00000229807	XIST	-0.378352	1.43462e-08	2.46736e-07
ENSG00000144218	AFF3	-0.874204	1.43705e-08	2.46891e-07
ENSG00000154654	NCAM2	0.36768	1.48678e-08	2.55166e-07
ENSG00000237441	RGL2	0.447966	1.49932e-08	2.57045e-07
ENSG00000115183	TANC1	-0.406302	1.53316e-08	2.62569e-07
ENSG00000204580	DDR1	0.332335	1.55079e-08	2.65306e-07
ENSG00000064651	SLC12A2	-0.404359	1.5598e-08	2.66565e-07
ENSG00000139998	RAB15	-0.340012	1.56657e-08	2.67441e-07
ENSG00000123159	GIPC1	0.386697	1.59146e-08	2.71404e-07
ENSG00000134013	LOXL2	0.941141	1.61765e-08	2.75579e-07
ENSG00000173457	PPP1R14B	0.45268	1.62735e-08	2.76941e-07
ENSG00000189067	LITAF	0.342439	1.63309e-08	2.77625e-07
ENSG00000055332	EIF2AK2	-0.365654	1.63673e-08	2.77952e-07
ENSG00000164619	BMPER	-0.734793	1.65e-08	2.79912e-07
ENSG00000123353	ORMDL2	0.488098	1.65867e-08	2.81087e-07
ENSG00000128016	ZFP36	-0.381597	1.6684e-08	2.82442e-07
ENSG00000217128	FNIP1	-0.369169	1.69818e-08	2.87182e-07
ENSG00000165379	LRFN5	1.1174	1.70223e-08	2.87567e-07
ENSG00000114331	ACAP2	-0.351335	1.71485e-08	2.89396e-07
ENSG00000099377	HSD3B7	0.449272	1.74345e-08	2.93916e-07
ENSG00000126947	ARMCX1	-0.521861	1.75005e-08	2.94723e-07
ENSG00000176978	DPP7	0.436094	1.78592e-08	3.00451e-07
ENSG00000197070	ARRDC1	0.35277	1.79644e-08	3.01907e-07
ENSG00000126882	FAM78A	0.828361	1.81594e-08	3.04867e-07
ENSG00000231160	KLF3-AS1	-0.794692	1.82143e-08	3.05472e-07
ENSG00000143314	MRPL24	0.354086	1.89648e-08	3.1773e-07
ENSG00000104522	TSTA3	0.415646	1.93977e-08	3.24645e-07
ENSG00000129562	DAD1	0.336746	1.95647e-08	3.26996e-07
ENSG00000143322	ABL2	-0.392424	1.95786e-08	3.26996e-07
ENSG00000100028	SNRPD3	0.326789	1.96763e-08	3.28291e-07
ENSG00000174738	NR1D2	-0.388534	1.98801e-08	3.31203e-07
ENSG00000235121	RP11-90L20.2	-1.01066	1.98918e-08	3.31203e-07
ENSG00000196118	CCDC189	0.703015	2.00829e-08	3.3404e-07
ENSG00000137700	SLC37A4	0.361357	2.01322e-08	3.34517e-07
ENSG00000164976	KIAA1161	0.471888	2.02853e-08	3.36715e-07
ENSG00000169976	SF3B5	0.39769	2.07412e-08	3.43931e-07
ENSG00000117528	ABCD3	-0.404001	2.0819e-08	3.44867e-07
ENSG00000116729	WLS	-0.677853	2.13604e-08	3.53473e-07
ENSG00000127564	PKMYT1	0.39855	2.24196e-08	3.70622e-07
ENSG00000166033	HTRA1	0.721249	2.29962e-08	3.79766e-07
ENSG00000240849	TMEM189	0.356835	2.30593e-08	3.8042e-07
ENSG00000132383	RPA1	0.319963	2.31769e-08	3.81904e-07
ENSG00000100577	GSTZ1	0.372887	2.32185e-08	3.81904e-07
ENSG00000181885	CLDN7	0.411312	2.32201e-08	3.81904e-07
ENSG00000099804	CDC34	0.45086	2.33654e-08	3.83904e-07
ENSG00000155158	TTC39B	-0.423404	2.35315e-08	3.86241e-07
ENSG00000159216	RUNX1	-0.310882	2.35705e-08	3.8649e-07
ENSG00000112379	ARFGEF3	-0.36783	2.35985e-08	3.86558e-07
ENSG00000145365	TIFA	-0.513845	2.40307e-08	3.93238e-07
ENSG00000008853	RHOBTB2	0.579059	2.43069e-08	3.97357e-07
ENSG00000166068	SPRED1	-0.592307	2.48944e-08	4.06549e-07
ENSG00000102898	NUTF2	0.35877	2.51312e-08	4.10003e-07
ENSG00000134531	EMP1	-0.852319	2.5193e-08	4.10598e-07
ENSG00000183258	DDX41	0.314601	2.53104e-08	4.12097e-07
ENSG00000185088	RPS27L	-0.301524	2.5528e-08	4.15221e-07
ENSG00000164946	FREM1	-1.14587	2.61697e-08	4.25231e-07
ENSG00000140374	ETFA	0.289615	2.69386e-08	4.37287e-07
ENSG00000164924	YWHAZ	-0.274835	2.74888e-08	4.4577e-07
ENSG00000164920	OSR2	0.395468	2.77448e-08	4.49379e-07
ENSG00000179271	GADD45GIP1	0.534344	2.77668e-08	4.49379e-07
ENSG00000233264	AC006042.8	-0.981287	2.79836e-08	4.52434e-07
ENSG00000129003	VPS13C	-0.392847	2.80659e-08	4.53312e-07
ENSG00000115073	ACTR1B	0.377511	2.84274e-08	4.58693e-07
ENSG00000129354	AP1M2	0.325345	2.8813e-08	4.64452e-07
ENSG00000154102	C16orf74	0.612533	2.90464e-08	4.67748e-07
ENSG00000177628	GBA	0.422266	2.96034e-08	4.76244e-07
ENSG00000103253	HAGHL	0.666112	2.96546e-08	4.76593e-07
ENSG00000183570	PCBP3	0.827386	3.17215e-08	5.09306e-07
ENSG00000179344	HLA-DQB1	-0.727955	3.19103e-08	5.1183e-07
ENSG00000054793	ATP9A	-0.313046	3.2575e-08	5.21974e-07
ENSG00000174938	SEZ6L2	0.418814	3.27312e-08	5.23958e-07
ENSG00000112282	MED23	-0.395694	3.30918e-08	5.29208e-07
ENSG00000114857	NKTR	-0.363952	3.31585e-08	5.29751e-07
ENSG00000177614	PGBD5	1.12139	3.33629e-08	5.32491e-07
ENSG00000108604	SMARCD2	0.276728	3.3519e-08	5.34455e-07
ENSG00000114423	CBLB	-0.459883	3.39692e-08	5.411e-07
ENSG00000152061	RABGAP1L	-0.470631	3.40568e-08	5.41963e-07
ENSG00000178922	HYI	0.480663	3.46192e-08	5.5037e-07
ENSG00000123983	ACSL3	0.303787	3.46849e-08	5.50873e-07
ENSG00000273802	HIST1H2BG	0.639815	3.51758e-08	5.58123e-07
ENSG00000277159	RP11-88E10.4	-0.906775	3.52149e-08	5.58195e-07
ENSG00000251562	MALAT1	-0.362473	3.58977e-08	5.68462e-07
ENSG00000214193	SH3D21	0.618273	3.61408e-08	5.71753e-07
ENSG00000214145	LINC00887	-1.08771	3.72046e-08	5.88006e-07
ENSG00000008294	SPAG9	-0.277064	3.86078e-08	6.09588e-07
ENSG00000105612	DNASE2	0.458365	3.904e-08	6.15813e-07
ENSG00000139354	GAS2L3	-0.43532	3.92915e-08	6.19176e-07
ENSG00000206527	HACD2	-0.29518	3.98181e-08	6.26864e-07
ENSG00000053254	FOXN3	-0.400652	4.05783e-08	6.38211e-07
ENSG00000166046	TCP11L2	-0.691597	4.10639e-08	6.45082e-07
ENSG00000118873	RAB3GAP2	-0.383302	4.10949e-08	6.45082e-07
ENSG00000155366	RHOC	0.393972	4.11727e-08	6.45677e-07
ENSG00000188833	ENTPD8	0.579862	4.14405e-08	6.49248e-07
ENSG00000133858	ZFC3H1	-0.304856	4.1684e-08	6.52431e-07
ENSG00000153976	HS3ST3A1	0.753346	4.18611e-08	6.5457e-07
ENSG00000177556	ATOX1	0.434141	4.21218e-08	6.5801e-07
ENSG00000182985	CADM1	0.512822	4.25573e-08	6.64174e-07
ENSG00000166272	WBP1L	0.408926	4.29318e-08	6.69355e-07
ENSG00000125746	EML2	0.42847	4.2972e-08	6.69355e-07
ENSG00000148362	C9orf142	0.366872	4.4077e-08	6.85447e-07
ENSG00000006453	BAIAP2L1	-0.368115	4.40899e-08	6.85447e-07
ENSG00000107864	CPEB3	-0.673897	4.42156e-08	6.86742e-07
ENSG00000073111	MCM2	0.343748	4.43466e-08	6.88116e-07
ENSG00000184575	XPOT	-0.26827	4.47776e-08	6.94139e-07
ENSG00000110975	SYT10	0.411368	4.48385e-08	6.94418e-07
ENSG00000169689	CENPX	0.450643	4.50452e-08	6.96952e-07
ENSG00000160404	TOR2A	0.475222	4.51085e-08	6.97264e-07
ENSG00000118200	CAMSAP2	-0.312648	4.58947e-08	7.08233e-07
ENSG00000225630	MTND2P28	0.397538	4.59056e-08	7.08233e-07
ENSG00000109654	TRIM2	-0.471221	4.61646e-08	7.1155e-07
ENSG00000185278	ZBTB37	-0.481659	4.70322e-08	7.23822e-07
ENSG00000185621	LMLN	0.506311	4.70502e-08	7.23822e-07
ENSG00000112378	PERP	0.298416	4.72386e-08	7.26031e-07
ENSG00000165434	PGM2L1	-0.453832	4.83649e-08	7.42635e-07
ENSG00000182199	SHMT2	0.29394	4.88899e-08	7.49985e-07
ENSG00000108510	MED13	-0.272248	4.89837e-08	7.50713e-07
ENSG00000167468	GPX4	0.389561	4.93387e-08	7.55437e-07
ENSG00000256594	RP11-705C15.2	0.605915	5.01968e-08	7.6785e-07
ENSG00000119718	EIF2B2	0.397562	5.08149e-08	7.76571e-07
ENSG00000174749	C4orf32	-0.424929	5.13198e-08	7.83547e-07
ENSG00000182606	TRAK1	-0.409672	5.14995e-08	7.85549e-07
ENSG00000183207	RUVBL2	0.431887	5.15812e-08	7.85911e-07
ENSG00000136141	LRCH1	-0.372972	5.16203e-08	7.85911e-07
ENSG00000184887	BTBD6	0.386035	5.17499e-08	7.87144e-07
ENSG00000102054	RBBP7	0.278867	5.21201e-08	7.9203e-07
ENSG00000120063	GNA13	-0.333844	5.22681e-08	7.93534e-07
ENSG00000154065	ANKRD29	-1.03604	5.35767e-08	8.11885e-07
ENSG00000196182	STK40	0.395156	5.36045e-08	8.11885e-07
ENSG00000011347	SYT7	0.444246	5.36273e-08	8.11885e-07
ENSG00000165802	NSMF	0.380682	5.45889e-08	8.2567e-07
ENSG00000183765	CHEK2	-0.365612	5.66574e-08	8.56157e-07
ENSG00000234678	ELF3-AS1	-0.992938	5.80559e-08	8.76471e-07
ENSG00000034677	RNF19A	-0.330617	5.9863e-08	9.0291e-07
ENSG00000177854	TMEM187	0.519265	6.01795e-08	9.06839e-07
ENSG00000185101	ANO9	0.517664	6.06328e-08	9.1282e-07
ENSG00000168040	FADD	0.411258	6.08541e-08	9.153e-07
ENSG00000007516	BAIAP3	0.510427	6.14347e-08	9.23175e-07
ENSG00000165140	FBP1	0.292873	6.18638e-08	9.2876e-07
ENSG00000186603	HPDL	0.677329	6.28627e-08	9.42883e-07
ENSG00000111859	NEDD9	-0.376188	6.36656e-08	9.5404e-07
ENSG00000099822	HCN2	0.494006	6.37277e-08	9.54088e-07
ENSG00000010256	UQCRC1	0.350627	6.54368e-08	9.78769e-07
ENSG00000169855	ROBO1	-0.379506	6.57548e-08	9.82619e-07
ENSG00000112759	SLC29A1	0.421527	6.75114e-08	1.00783e-06
ENSG00000172869	DMXL1	-0.350346	6.75668e-08	1.00783e-06
ENSG00000105483	CARD8	-0.446474	6.82267e-08	1.01674e-06
ENSG00000149311	ATM	-0.360294	7.07794e-08	1.05381e-06
ENSG00000059378	PARP12	-0.565879	7.34514e-08	1.09259e-06
ENSG00000109920	FNBP4	-0.296592	7.48719e-08	1.1127e-06
ENSG00000203709	C1orf132	-0.605744	7.61704e-08	1.13096e-06
ENSG00000196427	NBPF4	-0.69059	7.90674e-08	1.17289e-06
ENSG00000080031	PTPRH	-1.03832	8.03634e-08	1.19103e-06
ENSG00000167972	ABCA3	0.409138	8.27458e-08	1.22521e-06
ENSG00000112183	RBM24	-0.513422	8.38246e-08	1.24005e-06
ENSG00000082212	ME2	-0.471663	8.52275e-08	1.25965e-06
ENSG00000197969	VPS13A	-0.342592	8.60855e-08	1.27117e-06
ENSG00000230551	CTB-89H12.4	-0.359182	8.66487e-08	1.27833e-06
ENSG00000108256	NUFIP2	-0.299443	8.75287e-08	1.29013e-06
ENSG00000092068	SLC7A8	0.815427	8.83731e-08	1.30139e-06
ENSG00000276043	UHRF1	0.491427	8.88214e-08	1.3068e-06
ENSG00000237886	NALT1	0.915267	9.0532e-08	1.33076e-06
ENSG00000114790	ARHGEF26	-0.445613	9.17599e-08	1.34759e-06
ENSG00000172354	GNB2	0.330198	9.35015e-08	1.37192e-06
ENSG00000165626	BEND7	-0.420825	9.48626e-08	1.39063e-06
ENSG00000180185	FAHD1	0.500189	9.61584e-08	1.40835e-06
ENSG00000221838	AP4M1	0.489423	9.68179e-08	1.41673e-06
ENSG00000188153	COL4A5	-0.367536	9.88788e-08	1.44558e-06
ENSG00000166145	SPINT1	0.315441	9.93103e-08	1.45058e-06
ENSG00000262001	DLGAP1-AS2	-0.642603	9.99829e-08	1.45908e-06
ENSG00000108479	GALK1	0.518895	1.01134e-07	1.47455e-06
ENSG00000100523	DDHD1	-0.356654	1.01323e-07	1.47597e-06
ENSG00000131791	PRKAB2	-0.337998	1.02508e-07	1.49189e-06
ENSG00000198780	FAM169A	-0.767519	1.02942e-07	1.49686e-06
ENSG00000157500	APPL1	-0.401646	1.03319e-07	1.50058e-06
ENSG00000224660	SH3BP5-AS1	-0.460838	1.03383e-07	1.50058e-06
ENSG00000111860	CEP85L	-0.656599	1.0391e-07	1.50688e-06
ENSG00000125170	DOK4	0.822653	1.04011e-07	1.507e-06
ENSG00000258837	CTD-2566J3.1	-1.08404	1.06178e-07	1.53702e-06
ENSG00000169738	DCXR	0.422057	1.06765e-07	1.54413e-06
ENSG00000185432	METTL7A	-0.801528	1.09e-07	1.57505e-06
ENSG00000166432	ZMAT1	-0.445188	1.09176e-07	1.57619e-06
ENSG00000181450	ZNF678	-0.571467	1.09304e-07	1.57663e-06
ENSG00000125817	CENPB	0.325073	1.09503e-07	1.5781e-06
ENSG00000130158	DOCK6	0.309469	1.10054e-07	1.58462e-06
ENSG00000105982	RNF32	-0.593614	1.11011e-07	1.59699e-06
ENSG00000148175	STOM	0.352558	1.11402e-07	1.60117e-06
ENSG00000124733	MEA1	0.332452	1.12865e-07	1.62077e-06
ENSG00000139112	GABARAPL1	-0.861712	1.13163e-07	1.62355e-06
ENSG00000104361	NIPAL2	-0.327134	1.13259e-07	1.62355e-06
ENSG00000105516	DBP	0.493928	1.13702e-07	1.62845e-06
ENSG00000140990	NDUFB10	0.447773	1.15404e-07	1.65136e-06
ENSG00000003436	TFPI	-0.494674	1.15699e-07	1.65413e-06
ENSG00000132846	ZBED3	-0.546881	1.19905e-07	1.71275e-06
ENSG00000168002	POLR2G	0.306299	1.22817e-07	1.75279e-06
ENSG00000171552	BCL2L1	0.384414	1.25124e-07	1.78414e-06
ENSG00000175756	AURKAIP1	0.431849	1.25551e-07	1.78867e-06
ENSG00000158246	FAM46B	0.85841	1.28744e-07	1.83254e-06
ENSG00000175866	BAIAP2	0.456935	1.30343e-07	1.85366e-06
ENSG00000172663	TMEM134	0.428928	1.31144e-07	1.86342e-06
ENSG00000090013	BLVRB	0.362981	1.321e-07	1.87536e-06
ENSG00000138085	ATRAID	0.304426	1.32308e-07	1.87666e-06
ENSG00000117360	PRPF3	0.257908	1.33935e-07	1.89808e-06
ENSG00000115365	LANCL1	-0.356172	1.34548e-07	1.9051e-06
ENSG00000140105	WARS	-0.343409	1.34819e-07	1.90726e-06
ENSG00000144199	FAHD2B	-0.919548	1.34956e-07	1.90754e-06
ENSG00000136381	IREB2	-0.289037	1.35227e-07	1.9097e-06
ENSG00000136021	SCYL2	-0.291601	1.35921e-07	1.91782e-06
ENSG00000173801	JUP	0.368248	1.36434e-07	1.92339e-06
ENSG00000198961	PJA2	-0.306945	1.37811e-07	1.9411e-06
ENSG00000170485	NPAS2	-0.540958	1.38684e-07	1.9517e-06
ENSG00000005961	ITGA2B	0.820507	1.40326e-07	1.97257e-06
ENSG00000152409	JMY	-0.366923	1.40411e-07	1.97257e-06
ENSG00000135124	P2RX4	0.470739	1.41191e-07	1.98182e-06
ENSG00000163083	INHBB	0.302665	1.43186e-07	2.00808e-06
ENSG00000104881	PPP1R13L	0.419404	1.43349e-07	2.00862e-06
ENSG00000213585	VDAC1	0.284355	1.51771e-07	2.12479e-06
ENSG00000184007	PTP4A2	-0.287088	1.53089e-07	2.14139e-06
ENSG00000179950	PUF60	0.311915	1.55569e-07	2.17421e-06
ENSG00000159450	TCHH	0.474093	1.5747e-07	2.19888e-06
ENSG00000113248	PCDHB15	-0.868803	1.59991e-07	2.23215e-06
ENSG00000197858	GPAA1	0.376991	1.61295e-07	2.2484e-06
ENSG00000106541	AGR2	-0.299229	1.6297e-07	2.26979e-06
ENSG00000155545	MIER3	-0.383519	1.64835e-07	2.29381e-06
ENSG00000106080	FKBP14	-0.641341	1.67652e-07	2.331e-06
ENSG00000143590	EFNA3	0.674642	1.68494e-07	2.3407e-06
ENSG00000141985	SH3GL1	0.403863	1.68817e-07	2.34317e-06
ENSG00000047644	WWC3	-0.320368	1.79711e-07	2.49223e-06
ENSG00000119599	DCAF4	0.382681	1.80379e-07	2.49778e-06
ENSG00000132356	PRKAA1	-0.356267	1.80554e-07	2.49778e-06
ENSG00000267795	SMIM22	0.532398	1.80573e-07	2.49778e-06
ENSG00000118242	MREG	-0.300695	1.8095e-07	2.50086e-06
ENSG00000090661	CERS4	0.498695	1.90818e-07	2.63498e-06
ENSG00000162636	FAM102B	-0.310089	1.91294e-07	2.6393e-06
ENSG00000167461	RAB8A	0.317498	1.91644e-07	2.64188e-06
ENSG00000168268	NT5DC2	0.398776	1.92367e-07	2.64959e-06
ENSG00000146038	DCDC2	0.352182	1.92566e-07	2.65008e-06
ENSG00000142875	PRKACB	-0.433565	1.93023e-07	2.65255e-06
ENSG00000080503	SMARCA2	-0.300313	1.93074e-07	2.65255e-06
ENSG00000104872	PIH1D1	0.352354	1.94061e-07	2.66385e-06
ENSG00000170381	SEMA3E	-0.530777	1.97815e-07	2.71309e-06
ENSG00000189366	ALG1L	0.63356	1.98677e-07	2.72201e-06
ENSG00000137393	RNF144B	-0.629926	1.98805e-07	2.72201e-06
ENSG00000124228	DDX27	0.273444	1.9897e-07	2.72201e-06
ENSG00000197019	SERTAD1	0.482397	2.00822e-07	2.74503e-06
ENSG00000115350	POLE4	0.396078	2.024e-07	2.76425e-06
ENSG00000130653	PNPLA7	-0.537028	2.04788e-07	2.79452e-06
ENSG00000131080	EDA2R	-0.644387	2.10269e-07	2.86494e-06
ENSG00000130787	HIP1R	0.331142	2.10303e-07	2.86494e-06
ENSG00000101161	PRPF6	0.286846	2.13351e-07	2.90401e-06
ENSG00000127586	CHTF18	0.439029	2.13784e-07	2.90534e-06
ENSG00000104738	MCM4	0.253543	2.13807e-07	2.90534e-06
ENSG00000125037	EMC3	0.370179	2.15241e-07	2.92237e-06
ENSG00000102007	PLP2	0.313745	2.16339e-07	2.93414e-06
ENSG00000234602	MCIDAS	-0.892056	2.16471e-07	2.93414e-06
ENSG00000161981	SNRNP25	0.401084	2.22483e-07	3.01312e-06
ENSG00000273478	RP11-465N4.5	-1.05866	2.25415e-07	3.05027e-06
ENSG00000171940	ZNF217	0.251678	2.26063e-07	3.05648e-06
ENSG00000164975	SNAPC3	-0.374095	2.30053e-07	3.10783e-06
ENSG00000104979	C19orf53	0.36044	2.30381e-07	3.10967e-06
ENSG00000149927	DOC2A	0.498736	2.31363e-07	3.12032e-06
ENSG00000131165	CHMP1A	0.300037	2.32556e-07	3.13379e-06
ENSG00000118640	VAMP8	0.347791	2.33827e-07	3.14831e-06
ENSG00000096433	ITPR3	0.34345	2.35073e-07	3.16245e-06
ENSG00000224470	ATXN1L	-0.334272	2.35382e-07	3.16398e-06
ENSG00000183778	B3GALT5	-0.909036	2.37477e-07	3.18949e-06
ENSG00000023445	BIRC3	-1.04353	2.42562e-07	3.25507e-06
ENSG00000197323	TRIM33	-0.315483	2.42829e-07	3.25596e-06
ENSG00000145734	BDP1	-0.327061	2.43321e-07	3.25986e-06
ENSG00000159166	LAD1	0.322466	2.45698e-07	3.28898e-06
ENSG00000112208	BAG2	-0.69023	2.4621e-07	3.29311e-06
ENSG00000214049	UCA1	-1.012	2.52459e-07	3.37366e-06
ENSG00000089356	FXYD3	0.366246	2.5265e-07	3.37366e-06
ENSG00000065559	MAP2K4	-0.406002	2.54176e-07	3.39125e-06
ENSG00000196440	ARMCX4	-0.883424	2.55303e-07	3.40348e-06
ENSG00000273445	RP11-1399P15.1	1.05748	2.63151e-07	3.50521e-06
ENSG00000114127	XRN1	-0.392317	2.67009e-07	3.55368e-06
ENSG00000066248	NGEF	0.776192	2.75922e-07	3.66928e-06
ENSG00000107099	DOCK8	-0.440783	2.7993e-07	3.71953e-06
ENSG00000118193	KIF14	-0.397331	2.82388e-07	3.74911e-06
ENSG00000111790	FGFR1OP2	-0.384476	2.83152e-07	3.75617e-06
ENSG00000187735	TCEA1	-0.32116	2.8417e-07	3.76659e-06
ENSG00000170832	USP32	-0.304324	2.84825e-07	3.77218e-06
ENSG00000137955	RABGGTB	-0.342594	2.86739e-07	3.79443e-06
ENSG00000127870	RNF6	-0.339776	2.88845e-07	3.81917e-06
ENSG00000053770	AP5M1	-0.359987	2.95135e-07	3.89915e-06
ENSG00000011405	PIK3C2A	-0.365826	2.96837e-07	3.91844e-06
ENSG00000143970	ASXL2	-0.321945	2.9725e-07	3.92069e-06
ENSG00000166165	CKB	0.547427	3.01803e-07	3.9775e-06
ENSG00000173548	SNX33	-0.466232	3.09225e-07	4.07201e-06
ENSG00000151239	TWF1	-0.388009	3.11175e-07	4.09436e-06
ENSG00000141543	EIF4A3	0.282453	3.13542e-07	4.12215e-06
ENSG00000131669	NINJ1	0.373936	3.15304e-07	4.14195e-06
ENSG00000185129	PURA	-0.39074	3.15996e-07	4.14767e-06
ENSG00000117602	RCAN3	-0.561032	3.17023e-07	4.15778e-06
ENSG00000139410	SDSL	0.53543	3.17565e-07	4.16151e-06
ENSG00000136720	HS6ST1	0.46383	3.20836e-07	4.20098e-06
ENSG00000085377	PREP	0.348084	3.22156e-07	4.21485e-06
ENSG00000128039	SRD5A3	0.42097	3.23545e-07	4.22961e-06
ENSG00000006118	TMEM132A	0.381777	3.26094e-07	4.25949e-06
ENSG00000101333	PLCB4	-0.477312	3.27091e-07	4.26906e-06
ENSG00000183048	SLC25A10	0.689538	3.32907e-07	4.34147e-06
ENSG00000134590	FAM127A	-0.416138	3.35906e-07	4.37705e-06
ENSG00000117410	ATP6V0B	0.342801	3.37654e-07	4.39629e-06
ENSG00000169020	ATP5I	0.344055	3.52103e-07	4.58073e-06
ENSG00000112851	ERBIN	-0.278356	3.56492e-07	4.6341e-06
ENSG00000184076	UQCR10	0.350402	3.58691e-07	4.65895e-06
ENSG00000168675	LDLRAD4	0.59317	3.59074e-07	4.66019e-06
ENSG00000104331	IMPAD1	-0.28839	3.60265e-07	4.67189e-06
ENSG00000198833	UBE2J1	-0.333395	3.61903e-07	4.68938e-06
ENSG00000185298	CCDC137	0.404713	3.65066e-07	4.72658e-06
ENSG00000168701	TMEM208	0.418086	3.71124e-07	4.80117e-06
ENSG00000133597	ADCK2	0.464688	3.72693e-07	4.81762e-06
ENSG00000178401	DNAJC22	0.444584	3.77715e-07	4.87865e-06
ENSG00000117054	ACADM	-0.436116	3.79259e-07	4.89468e-06
ENSG00000160014	CALM3	0.288845	3.82977e-07	4.93873e-06
ENSG00000163485	ADORA1	0.869593	3.83387e-07	4.94007e-06
ENSG00000074695	LMAN1	-0.358847	3.88218e-07	4.99835e-06
ENSG00000206530	CFAP44	-0.357004	3.91927e-07	5.04208e-06
ENSG00000092871	RFFL	-0.548816	3.92601e-07	5.04675e-06
ENSG00000136888	ATP6V1G1	0.271224	3.96031e-07	5.0868e-06
ENSG00000152256	PDK1	-0.471485	3.99605e-07	5.12863e-06
ENSG00000165732	DDX21	-0.267283	4.09042e-07	5.24559e-06
ENSG00000280347	AC000123.2	-0.810768	4.15951e-07	5.32997e-06
ENSG00000169255	B3GALNT1	-0.292838	4.18393e-07	5.35702e-06
ENSG00000183011	NAA38	0.465802	4.21484e-07	5.39233e-06
ENSG00000149657	LSM14B	0.337568	4.22621e-07	5.4026e-06
ENSG00000115884	SDC1	0.282538	4.26684e-07	5.45024e-06
ENSG00000214253	FIS1	0.313939	4.3205e-07	5.51444e-06
ENSG00000006607	FARP2	-0.337102	4.36043e-07	5.56101e-06
ENSG00000114933	INO80D	-0.428473	4.43633e-07	5.65335e-06
ENSG00000134809	TIMM10	0.460891	4.44654e-07	5.66191e-06
ENSG00000119986	AVPI1	0.577736	4.5133e-07	5.7424e-06
ENSG00000204228	HSD17B8	0.582298	4.62904e-07	5.8808e-06
ENSG00000124198	ARFGEF2	-0.267103	4.62935e-07	5.8808e-06
ENSG00000203879	GDI1	0.286501	4.6494e-07	5.89707e-06
ENSG00000120137	PANK3	-0.308351	4.64944e-07	5.89707e-06
ENSG00000232638	RP11-379F12.4	0.641658	4.7103e-07	5.96958e-06
ENSG00000117450	PRDX1	0.301494	4.77486e-07	6.04666e-06
ENSG00000014123	UFL1	-0.310488	4.80364e-07	6.07835e-06
ENSG00000099341	PSMD8	0.303327	4.88981e-07	6.18256e-06
ENSG00000104524	PYCRL	0.59973	4.9805e-07	6.2923e-06
ENSG00000078747	ITCH	-0.312323	5.02631e-07	6.34384e-06
ENSG00000112658	SRF	-0.324244	5.02913e-07	6.34384e-06
ENSG00000198862	LTN1	-0.318115	5.04106e-07	6.35393e-06
ENSG00000169991	IFFO2	-0.527021	5.11427e-07	6.44119e-06
ENSG00000172500	FIBP	0.312435	5.14151e-07	6.47047e-06
ENSG00000157557	ETS2	-0.333259	5.15184e-07	6.47843e-06
ENSG00000111266	DUSP16	-0.342624	5.1726e-07	6.49948e-06
ENSG00000167797	CDK2AP2	0.365865	5.39096e-07	6.7686e-06
ENSG00000132031	MATN3	0.599799	5.42828e-07	6.81018e-06
ENSG00000118579	MED28	-0.318683	5.47067e-07	6.85378e-06
ENSG00000139324	TMTC3	-0.355206	5.4715e-07	6.85378e-06
ENSG00000129521	EGLN3	-0.576002	5.50038e-07	6.88462e-06
ENSG00000167114	SLC27A4	0.402108	5.55434e-07	6.94678e-06
ENSG00000154380	ENAH	-0.30727	5.59248e-07	6.98908e-06
ENSG00000182512	GLRX5	0.330413	5.62087e-07	7.01915e-06
ENSG00000079819	EPB41L2	-0.321349	5.85958e-07	7.3116e-06
ENSG00000186088	GSAP	-0.472704	5.91814e-07	7.37898e-06
ENSG00000169021	UQCRFS1	0.315111	5.93721e-07	7.39706e-06
ENSG00000138829	FBN2	-0.946803	5.95345e-07	7.41159e-06
ENSG00000117877	CD3EAP	0.477753	6.01058e-07	7.47695e-06
ENSG00000205629	LCMT1	0.311012	6.0153e-07	7.47708e-06
ENSG00000103187	COTL1	0.468291	6.02755e-07	7.48656e-06
ENSG00000136826	KLF4	-0.270853	6.03941e-07	7.49553e-06
ENSG00000176170	SPHK1	0.581139	6.06112e-07	7.51672e-06
ENSG00000067177	PHKA1	-0.340558	6.10709e-07	7.56792e-06
ENSG00000143554	SLC27A3	0.430995	6.17503e-07	7.64627e-06
ENSG00000154723	ATP5J	0.322146	6.1816e-07	7.64855e-06
ENSG00000153294	ADGRF4	0.451066	6.26944e-07	7.75131e-06
ENSG00000007944	MYLIP	-0.319091	6.28192e-07	7.7608e-06
ENSG00000213965	NUDT19	0.416391	6.32575e-07	7.80213e-06
ENSG00000188177	ZC3H6	-0.38796	6.32954e-07	7.80213e-06
ENSG00000163344	PMVK	0.357935	6.33197e-07	7.80213e-06
ENSG00000188554	NBR1	-0.264013	6.33465e-07	7.80213e-06
ENSG00000004059	ARF5	0.318164	6.36229e-07	7.83021e-06
ENSG00000169083	AR	-0.360701	6.41689e-07	7.89141e-06
ENSG00000197603	C5orf42	-0.433396	6.42901e-07	7.90031e-06
ENSG00000128266	GNAZ	0.635815	6.44868e-07	7.91847e-06
ENSG00000104312	RIPK2	-0.314231	6.47375e-07	7.94322e-06
ENSG00000066735	KIF26A	0.680903	6.58233e-07	8.07034e-06
ENSG00000121440	PDZRN3	0.795431	6.71813e-07	8.2306e-06
ENSG00000129292	PHF20L1	-0.29626	6.94809e-07	8.50381e-06
ENSG00000138495	COX17	0.433344	6.95164e-07	8.50381e-06
ENSG00000165813	CCDC186	-0.441211	7.07533e-07	8.64857e-06
ENSG00000160145	KALRN	0.413866	7.20384e-07	8.79902e-06
ENSG00000105219	CNTD2	-0.931537	7.30422e-07	8.91047e-06
ENSG00000141556	TBCD	0.33275	7.3061e-07	8.91047e-06
ENSG00000138311	ZNF365	-0.705574	7.34849e-07	8.95541e-06
ENSG00000182957	SPATA13	0.386298	7.41347e-07	9.02781e-06
ENSG00000163625	WDFY3	-0.339975	7.53298e-07	9.16645e-06
ENSG00000099308	MAST3	0.574673	7.70512e-07	9.36887e-06
ENSG00000196976	LAGE3	0.475038	7.72289e-07	9.38342e-06
ENSG00000130204	TOMM40	0.355499	7.80488e-07	9.47593e-06
ENSG00000084731	KIF3C	0.556593	7.85737e-07	9.53251e-06
ENSG00000081803	CADPS2	-0.393167	7.86626e-07	9.53615e-06
ENSG00000157184	CPT2	0.417534	7.91194e-07	9.58434e-06
ENSG00000105258	POLR2I	0.483749	8.01232e-07	9.69868e-06
ENSG00000116478	HDAC1	0.274166	8.14112e-07	9.84723e-06
ENSG00000150347	ARID5B	-0.342332	8.22149e-07	9.93702e-06
ENSG00000147649	MTDH	-0.277468	8.23907e-07	9.94819e-06
ENSG00000240216	CPHL1P	-0.567135	8.24303e-07	9.94819e-06
ENSG00000183935	HTR7P1	0.70819	8.41652e-07	1.015e-05
ENSG00000048405	ZNF800	-0.447257	8.48238e-07	1.02136e-05
ENSG00000230989	HSBP1	0.24332	8.48662e-07	1.02136e-05
ENSG00000177156	TALDO1	0.336015	8.48823e-07	1.02136e-05
ENSG00000204623	ZNRD1ASP	-0.51771	8.56432e-07	1.02975e-05
ENSG00000247809	NR2F2-AS1	-0.753761	8.60597e-07	1.03399e-05
ENSG00000102780	DGKH	-0.397961	8.62418e-07	1.03541e-05
ENSG00000172183	ISG20	0.50819	8.73489e-07	1.04793e-05
ENSG00000101596	SMCHD1	-0.289522	8.85042e-07	1.061e-05
ENSG00000171105	INSR	0.393079	8.86551e-07	1.06202e-05
ENSG00000167536	DHRS13	0.528367	8.89827e-07	1.06516e-05
ENSG00000243364	EFNA4	0.623822	9.00677e-07	1.07674e-05
ENSG00000177971	IMP3	0.426079	9.00834e-07	1.07674e-05
ENSG00000254986	DPP3	0.354081	9.0702e-07	1.08334e-05
ENSG00000184384	MAML2	-0.516036	9.19103e-07	1.09696e-05
ENSG00000184009	ACTG1	0.24702	9.27341e-07	1.10598e-05
ENSG00000171132	PRKCE	-0.384821	9.35819e-07	1.11526e-05
ENSG00000179262	RAD23A	0.288347	9.42597e-07	1.12252e-05
ENSG00000103653	CSK	0.368648	9.43543e-07	1.12282e-05
ENSG00000092421	SEMA6A	0.528959	9.56487e-07	1.13738e-05
ENSG00000126602	TRAP1	0.311868	9.72269e-07	1.1553e-05
ENSG00000259803	SLC22A31	0.980264	9.79295e-07	1.1628e-05
ENSG00000085276	MECOM	-0.4505	9.85255e-07	1.16902e-05
ENSG00000161091	MFSD12	0.473508	9.95152e-07	1.17989e-05
ENSG00000242173	ARHGDIG	0.700529	9.97436e-07	1.18174e-05
ENSG00000153179	RASSF3	-0.357915	1.00366e-06	1.18823e-05
ENSG00000178177	LCORL	-0.44239	1.00849e-06	1.19308e-05
ENSG00000106628	POLD2	0.304149	1.02474e-06	1.21143e-05
ENSG00000126457	PRMT1	0.273735	1.06192e-06	1.25446e-05
ENSG00000204876	AC021218.2	-0.955921	1.06606e-06	1.25844e-05
ENSG00000153048	CARHSP1	0.347866	1.08576e-06	1.28076e-05
ENSG00000100321	SYNGR1	0.525484	1.09705e-06	1.29313e-05
ENSG00000187848	P2RX2	0.504662	1.09931e-06	1.29485e-05
ENSG00000203485	INF2	0.324185	1.1039e-06	1.29931e-05
ENSG00000139083	ETV6	-0.487459	1.10996e-06	1.30549e-05
ENSG00000169223	LMAN2	0.287637	1.11688e-06	1.31268e-05
ENSG00000157045	NTAN1	0.410586	1.12272e-06	1.31859e-05
ENSG00000152601	MBNL1	-0.360402	1.1268e-06	1.32241e-05
ENSG00000198363	ASPH	-0.306742	1.12921e-06	1.32429e-05
ENSG00000203499	FAM83H-AS1	0.313633	1.14415e-06	1.34083e-05
ENSG00000115652	UXS1	0.327069	1.15466e-06	1.35218e-05
ENSG00000172922	RNASEH2C	0.374606	1.17099e-06	1.37031e-05
ENSG00000143952	VPS54	-0.326247	1.18535e-06	1.38611e-05
ENSG00000139163	ETNK1	-0.395142	1.1998e-06	1.40199e-05
ENSG00000164078	MST1R	0.581818	1.204e-06	1.40588e-05
ENSG00000163964	PIGX	0.34446	1.2187e-06	1.42202e-05
ENSG00000158158	CNNM4	0.289399	1.22462e-06	1.42789e-05
ENSG00000162813	BPNT1	-0.388815	1.23088e-06	1.43417e-05
ENSG00000155660	PDIA4	0.310757	1.23447e-06	1.43732e-05
ENSG00000105887	MTPN	-0.283425	1.24008e-06	1.4428e-05
ENSG00000172893	DHCR7	0.283459	1.24266e-06	1.44477e-05
ENSG00000179958	DCTPP1	0.366418	1.27532e-06	1.48168e-05
ENSG00000268621	IGFL2-AS1	-0.996858	1.28249e-06	1.48894e-05
ENSG00000187951	ARHGAP11B	-0.390955	1.29465e-06	1.50198e-05
ENSG00000179023	KLHDC7A	-0.813315	1.29653e-06	1.50308e-05
ENSG00000180776	ZDHHC20	-0.344707	1.30386e-06	1.5105e-05
ENSG00000188959	C9orf152	-0.930085	1.31649e-06	1.52404e-05
ENSG00000108852	MPP2	0.797332	1.32632e-06	1.53432e-05
ENSG00000165916	PSMC3	0.266235	1.32787e-06	1.53501e-05
ENSG00000156299	TIAM1	-0.357359	1.33272e-06	1.53952e-05
ENSG00000258302	RP11-981P6.1	-0.891735	1.33477e-06	1.54079e-05
ENSG00000162976	PQLC3	0.360284	1.35214e-06	1.55973e-05
ENSG00000173889	PHC3	-0.316664	1.36336e-06	1.57156e-05
ENSG00000105438	KDELR1	0.246109	1.37234e-06	1.58078e-05
ENSG00000177119	ANO6	-0.293507	1.41393e-06	1.62753e-05
ENSG00000187239	FNBP1	0.318925	1.4251e-06	1.63922e-05
ENSG00000152492	CCDC50	-0.326212	1.42722e-06	1.64049e-05
ENSG00000138814	PPP3CA	-0.411442	1.43918e-06	1.65297e-05
ENSG00000180992	MRPL14	0.342055	1.44012e-06	1.65297e-05
ENSG00000130821	SLC6A8	0.539639	1.46226e-06	1.6772e-05
ENSG00000184207	PGP	0.369192	1.52143e-06	1.74383e-05
ENSG00000116117	PARD3B	-0.477868	1.54641e-06	1.77063e-05
ENSG00000008277	ADAM22	-0.466972	1.547e-06	1.77063e-05
ENSG00000118503	TNFAIP3	-0.60183	1.56624e-06	1.79138e-05
ENSG00000108819	PPP1R9B	0.320249	1.5682e-06	1.79236e-05
ENSG00000153982	GDPD1	-0.569176	1.57109e-06	1.7926e-05
ENSG00000269895	AP000654.4	-0.906411	1.5717e-06	1.7926e-05
ENSG00000160213	CSTB	0.309113	1.57174e-06	1.7926e-05
ENSG00000171033	PKIA	-0.378526	1.57441e-06	1.79439e-05
ENSG00000127526	SLC35E1	0.314605	1.58357e-06	1.80356e-05
ENSG00000110628	SLC22A18	0.588607	1.58774e-06	1.80703e-05
ENSG00000103855	CD276	0.307796	1.61196e-06	1.83331e-05
ENSG00000090266	NDUFB2	0.350497	1.6455e-06	1.87014e-05
ENSG00000197905	TEAD4	0.604269	1.686e-06	1.91482e-05
ENSG00000106244	PDAP1	0.28921	1.7049e-06	1.93493e-05
ENSG00000163382	NAXE	0.368323	1.7208e-06	1.95161e-05
ENSG00000072501	SMC1A	0.267417	1.73041e-06	1.96113e-05
ENSG00000171448	ZBTB26	-0.320115	1.74682e-06	1.97835e-05
ENSG00000156802	ATAD2	0.228646	1.76399e-06	1.99639e-05
ENSG00000169710	FASN	0.361987	1.77251e-06	2.00463e-05
ENSG00000036672	USP2	0.855852	1.78458e-06	2.01688e-05
ENSG00000167315	ACAA2	0.376626	1.78594e-06	2.01701e-05
ENSG00000024526	DEPDC1	-0.372321	1.79065e-06	2.02091e-05
ENSG00000101189	MRGBP	0.315182	1.7941e-06	2.02339e-05
ENSG00000184992	BRI3BP	0.288333	1.83295e-06	2.06577e-05
ENSG00000232400	RAD17P1	-0.937145	1.85325e-06	2.0872e-05
ENSG00000196268	ZNF493	-0.590684	1.86984e-06	2.10413e-05
ENSG00000143545	RAB13	0.325638	1.87089e-06	2.10413e-05
ENSG00000141349	G6PC3	0.410808	1.88719e-06	2.12048e-05
ENSG00000104853	CLPTM1	0.33375	1.88805e-06	2.12048e-05
ENSG00000147155	EBP	0.336987	1.89285e-06	2.12339e-05
ENSG00000112695	COX7A2	0.284527	1.89326e-06	2.12339e-05
ENSG00000115317	HTRA2	0.402715	1.90108e-06	2.13068e-05
ENSG00000100097	LGALS1	0.323972	1.94411e-06	2.1774e-05
ENSG00000164292	RHOBTB3	-0.264352	1.97026e-06	2.20517e-05
ENSG00000110841	PPFIBP1	-0.377752	2.00462e-06	2.24207e-05
ENSG00000129474	AJUBA	0.333199	2.01555e-06	2.25274e-05
ENSG00000180596	HIST1H2BC	0.826809	2.02268e-06	2.25915e-05
ENSG00000134574	DDB2	-0.244506	2.04256e-06	2.27977e-05
ENSG00000160179	ABCG1	-0.51322	2.04524e-06	2.28e-05
ENSG00000070540	WIPI1	-0.435053	2.04558e-06	2.28e-05
ENSG00000012124	CD22	0.656399	2.05844e-06	2.29276e-05
ENSG00000143748	NVL	0.346045	2.07157e-06	2.30579e-05
ENSG00000168032	ENTPD3	-0.976634	2.07811e-06	2.31149e-05
ENSG00000145912	NHP2	0.318313	2.09186e-06	2.32519e-05
ENSG00000113231	PDE8B	-0.976041	2.09563e-06	2.32778e-05
ENSG00000004838	ZMYND10	0.953798	2.10201e-06	2.33326e-05
ENSG00000137747	TMPRSS13	0.394617	2.11136e-06	2.34203e-05
ENSG00000130517	PGPEP1	-0.321054	2.1184e-06	2.34703e-05
ENSG00000163956	LRPAP1	0.329193	2.11877e-06	2.34703e-05
ENSG00000172379	ARNT2	-0.393821	2.12809e-06	2.35575e-05
ENSG00000066422	ZBTB11	-0.289254	2.15252e-06	2.38116e-05
ENSG00000163898	LIPH	0.595041	2.17491e-06	2.40429e-05
ENSG00000100297	MCM5	0.30783	2.19792e-06	2.42749e-05
ENSG00000175197	DDIT3	-0.308235	2.1989e-06	2.42749e-05
ENSG00000174939	ASPHD1	0.867708	2.20097e-06	2.42812e-05
ENSG00000143850	PLEKHA6	0.284656	2.2217e-06	2.44932e-05
ENSG00000162073	PAQR4	0.374583	2.23657e-06	2.46404e-05
ENSG00000141552	ANAPC11	0.360468	2.2392e-06	2.46525e-05
ENSG00000148154	UGCG	-0.296224	2.25938e-06	2.48578e-05
ENSG00000144747	TMF1	-0.343825	2.26126e-06	2.48616e-05
ENSG00000138771	SHROOM3	-0.376583	2.26934e-06	2.49335e-05
ENSG00000245532	NEAT1	-0.552655	2.29091e-06	2.51488e-05
ENSG00000150756	FAM173B	0.397469	2.29204e-06	2.51488e-05
ENSG00000197903	HIST1H2BK	0.651271	2.29639e-06	2.51794e-05
ENSG00000150995	ITPR1	-0.641502	2.29867e-06	2.51873e-05
ENSG00000048052	HDAC9	0.962238	2.30362e-06	2.52245e-05
ENSG00000168172	HOOK3	-0.404585	2.30556e-06	2.52287e-05
ENSG00000111775	COX6A1	0.300231	2.3255e-06	2.54296e-05
ENSG00000211459	MT-RNR1	0.283116	2.33061e-06	2.54682e-05
ENSG00000104047	DTWD1	-0.328454	2.33217e-06	2.54682e-05
ENSG00000134109	EDEM1	-0.312	2.33557e-06	2.54881e-05
ENSG00000248964	RP11-94H18.1	-0.953563	2.37584e-06	2.59101e-05
ENSG00000108352	RAPGEFL1	-0.288907	2.38293e-06	2.59699e-05
ENSG00000035499	DEPDC1B	-0.35628	2.39642e-06	2.60836e-05
ENSG00000255983	RP11-1038A11.1	-0.706059	2.39659e-06	2.60836e-05
ENSG00000115053	NCL	0.217244	2.42586e-06	2.63845e-05
ENSG00000113645	WWC1	0.296699	2.44504e-06	2.65753e-05
ENSG00000070731	ST6GALNAC2	0.38191	2.4543e-06	2.66579e-05
ENSG00000169093	ASMTL	0.386814	2.46262e-06	2.67304e-05
ENSG00000117632	STMN1	0.29181	2.47941e-06	2.68946e-05
ENSG00000273702	RP11-758H9.2	0.608913	2.48403e-06	2.69266e-05
ENSG00000142669	SH3BGRL3	0.364869	2.48708e-06	2.69417e-05
ENSG00000267750	RUNDC3A-AS1	0.545781	2.50411e-06	2.71081e-05
ENSG00000144455	SUMF1	0.347507	2.52844e-06	2.73531e-05
ENSG00000033178	UBA6	-0.279757	2.5369e-06	2.74263e-05
ENSG00000144560	VGLL4	-0.297077	2.55618e-06	2.76163e-05
ENSG00000164331	ANKRA2	-0.366489	2.56346e-06	2.76765e-05
ENSG00000023516	AKAP11	-0.296298	2.56739e-06	2.76953e-05
ENSG00000228594	FNDC10	0.608124	2.56863e-06	2.76953e-05
ENSG00000070214	SLC44A1	0.262384	2.6078e-06	2.80989e-05
ENSG00000214796	RP11-480I12.5	0.446725	2.6308e-06	2.83279e-05
ENSG00000023902	PLEKHO1	-0.688659	2.63622e-06	2.83674e-05
ENSG00000124429	POF1B	-0.347218	2.6536e-06	2.85354e-05
ENSG00000135404	CD63	0.30876	2.74457e-06	2.94941e-05
ENSG00000173575	CHD2	-0.234731	2.75473e-06	2.95837e-05
ENSG00000122126	OCRL	-0.293397	2.7601e-06	2.96216e-05
ENSG00000136603	SKIL	-0.325856	2.77286e-06	2.97389e-05
ENSG00000198431	TXNRD1	-0.280356	2.78973e-06	2.99e-05
ENSG00000165338	HECTD2	-0.479157	2.7954e-06	2.99409e-05
ENSG00000104517	UBR5	-0.240145	2.80816e-06	3.00577e-05
ENSG00000101336	HCK	0.655021	2.81215e-06	3.00805e-05
ENSG00000182504	CEP97	-0.43747	2.82259e-06	3.01679e-05
ENSG00000167792	NDUFV1	0.294818	2.82404e-06	3.01679e-05
ENSG00000118496	FBXO30	-0.420122	2.85602e-06	3.04893e-05
ENSG00000005001	PRSS22	-0.415114	2.87805e-06	3.07043e-05
ENSG00000165527	ARF6	0.257851	2.89614e-06	3.08769e-05
ENSG00000074964	ARHGEF10L	-0.338194	2.92309e-06	3.11437e-05
ENSG00000166263	STXBP4	-0.40356	2.93204e-06	3.12185e-05
ENSG00000233901	LINC01503	0.477032	2.94118e-06	3.12953e-05
ENSG00000270882	HIST2H4A	0.938799	2.95826e-06	3.14563e-05
ENSG00000213047	DENND1B	-0.412581	3.0141e-06	3.2029e-05
ENSG00000163291	PAQR3	-0.567331	3.05891e-06	3.24839e-05
ENSG00000280202	RP5-1180D12.1	-0.93555	3.08287e-06	3.27164e-05
ENSG00000179195	ZNF664	-0.235824	3.08485e-06	3.27164e-05
ENSG00000166326	TRIM44	-0.26464	3.11303e-06	3.29937e-05
ENSG00000186314	PRELID2	-0.580139	3.12576e-06	3.31069e-05
ENSG00000151135	TMEM263	-0.392518	3.25676e-06	3.44718e-05
ENSG00000157106	SMG1	-0.241109	3.27394e-06	3.4631e-05
ENSG00000189337	KAZN	0.448084	3.28092e-06	3.46821e-05
ENSG00000114107	CEP70	-0.332778	3.28803e-06	3.47329e-05
ENSG00000141858	SAMD1	0.35605	3.29001e-06	3.47329e-05
ENSG00000111667	USP5	0.301907	3.30272e-06	3.48444e-05
ENSG00000244879	GABPB1-AS1	-0.323059	3.32457e-06	3.5052e-05
ENSG00000173281	PPP1R3B	-0.437501	3.33995e-06	3.51913e-05
ENSG00000144959	NCEH1	-0.481021	3.34836e-06	3.52331e-05
ENSG00000131876	SNRPA1	0.309713	3.34933e-06	3.52331e-05
ENSG00000109919	MTCH2	0.262817	3.35045e-06	3.52331e-05
ENSG00000238105	GOLGA2P5	-0.320404	3.35621e-06	3.52708e-05
ENSG00000183098	GPC6	-0.725612	3.37419e-06	3.54367e-05
ENSG00000100258	LMF2	0.490582	3.39629e-06	3.56456e-05
ENSG00000138594	TMOD3	-0.329721	3.40745e-06	3.57396e-05
ENSG00000079616	KIF22	0.266079	3.4157e-06	3.58029e-05
ENSG00000188785	ZNF548	-0.486284	3.47026e-06	3.63512e-05
ENSG00000074181	NOTCH3	0.302133	3.48256e-06	3.64565e-05
ENSG00000164164	OTUD4	-0.321238	3.52765e-06	3.69046e-05
ENSG00000213719	CLIC1	0.241673	3.54714e-06	3.70845e-05
ENSG00000162302	RPS6KA4	0.396259	3.569e-06	3.72823e-05
ENSG00000141526	SLC16A3	0.510059	3.57066e-06	3.72823e-05
ENSG00000090054	SPTLC1	-0.287949	3.57557e-06	3.73095e-05
ENSG00000167702	KIFC2	0.367957	3.58772e-06	3.74121e-05
ENSG00000132677	RHBG	0.692905	3.59904e-06	3.75061e-05
ENSG00000142188	TMEM50B	0.370699	3.61304e-06	3.76277e-05
ENSG00000108219	TSPAN14	0.285058	3.69318e-06	3.84376e-05
ENSG00000283526	RP11-40A7.2	0.783447	3.70384e-06	3.85237e-05
ENSG00000101040	ZMYND8	-0.255792	3.71112e-06	3.85746e-05
ENSG00000075131	TIPIN	0.441228	3.71505e-06	3.85907e-05
ENSG00000164885	CDK5	0.485361	3.74698e-06	3.88935e-05
ENSG00000241468	ATP5J2	0.299545	3.75051e-06	3.88935e-05
ENSG00000179674	ARL14	-0.93147	3.7525e-06	3.88935e-05
ENSG00000100632	ERH	0.256092	3.75381e-06	3.88935e-05
ENSG00000196411	EPHB4	0.317726	3.76337e-06	3.89677e-05
ENSG00000174010	KLHL15	-0.513641	3.77897e-06	3.91041e-05
ENSG00000176658	MYO1D	0.314963	3.87313e-06	4.00529e-05
ENSG00000170456	DENND5B	-0.591079	3.91864e-06	4.04976e-05
ENSG00000156103	MMP16	0.754791	3.93139e-06	4.06034e-05
ENSG00000127884	ECHS1	0.322475	3.9351e-06	4.06158e-05
ENSG00000146701	MDH2	0.287609	3.94796e-06	4.07226e-05
ENSG00000148450	MSRB2	0.367203	3.96941e-06	4.09178e-05
ENSG00000171604	CXXC5	0.242126	3.98082e-06	4.10093e-05
ENSG00000114346	ECT2	-0.277268	3.99882e-06	4.11685e-05
ENSG00000165185	KIAA1958	-0.395812	4.01722e-06	4.13316e-05
ENSG00000114120	SLC25A36	-0.321105	4.04085e-06	4.15484e-05
ENSG00000138448	ITGAV	-0.242677	4.04919e-06	4.16077e-05
ENSG00000279821	RP11-1334A24.5	-0.901682	4.05777e-06	4.16694e-05
ENSG00000137507	LRRC32	-0.948435	4.06193e-06	4.16857e-05
ENSG00000173992	CCS	0.400125	4.08578e-06	4.18971e-05
ENSG00000189079	ARID2	-0.26953	4.08771e-06	4.18971e-05
ENSG00000066117	SMARCD1	-0.272146	4.11282e-06	4.21278e-05
ENSG00000175147	TMEM51-AS1	-0.561618	4.11881e-06	4.21625e-05
ENSG00000062282	DGAT2	0.413554	4.13844e-06	4.23366e-05
ENSG00000120278	PLEKHG1	-0.733954	4.17726e-06	4.27067e-05
ENSG00000175115	PACS1	0.299742	4.18515e-06	4.27604e-05
ENSG00000135333	EPHA7	0.357522	4.20132e-06	4.28985e-05
ENSG00000135317	SNX14	0.287087	4.3451e-06	4.43387e-05
ENSG00000100731	PCNX1	-0.275977	4.39101e-06	4.47789e-05
ENSG00000129473	BCL2L2	-0.295597	4.41735e-06	4.50191e-05
ENSG00000125356	NDUFA1	0.259064	4.44007e-06	4.52222e-05
ENSG00000252690	SCARNA15	-0.575281	4.46446e-06	4.5442e-05
ENSG00000185482	STAC3	0.566048	4.4773e-06	4.55181e-05
ENSG00000185000	DGAT1	0.503348	4.47756e-06	4.55181e-05
ENSG00000256940	RP11-783K16.5	0.843762	4.48311e-06	4.5546e-05
ENSG00000179295	PTPN11	-0.240102	4.52674e-06	4.59604e-05
ENSG00000123609	NMI	-0.392023	4.536e-06	4.60255e-05
ENSG00000163635	ATXN7	-0.280304	4.54583e-06	4.60963e-05
ENSG00000151376	ME3	-0.828067	4.56356e-06	4.62296e-05
ENSG00000168906	MAT2A	-0.222458	4.56469e-06	4.62296e-05
ENSG00000159335	PTMS	0.289215	4.57575e-06	4.63126e-05
ENSG00000131375	CAPN7	-0.264836	4.60857e-06	4.66156e-05
ENSG00000196683	TOMM7	0.277169	4.62461e-06	4.67488e-05
ENSG00000065534	MYLK	-0.728067	4.65326e-06	4.7009e-05
ENSG00000180879	SSR4	0.348808	4.6633e-06	4.70731e-05
ENSG00000035664	DAPK2	-0.422005	4.66543e-06	4.70731e-05
ENSG00000073578	SDHA	0.269449	4.72392e-06	4.76336e-05
ENSG00000182795	C1orf116	-0.937571	4.7685e-06	4.80531e-05
ENSG00000069849	ATP1B3	0.291141	4.78343e-06	4.81737e-05
ENSG00000000003	TSPAN6	-0.353781	4.79381e-06	4.82482e-05
ENSG00000198604	BAZ1A	-0.235685	4.8218e-06	4.84997e-05
ENSG00000175455	CCDC14	-0.309952	4.83081e-06	4.85601e-05
ENSG00000163694	RBM47	-0.261849	4.83499e-06	4.8572e-05
ENSG00000177830	CHID1	0.375577	4.87182e-06	4.89117e-05
ENSG00000142949	PTPRF	0.271008	4.91703e-06	4.93248e-05
ENSG00000170522	ELOVL6	-0.311954	4.91907e-06	4.93248e-05
ENSG00000179104	TMTC2	-0.388048	4.96895e-06	4.97941e-05
ENSG00000136830	FAM129B	0.272052	5.00923e-06	5.01667e-05
ENSG00000064195	DLX3	0.669726	5.01825e-06	5.02259e-05
ENSG00000105088	OLFM2	0.660451	5.07999e-06	5.0803e-05
ENSG00000160752	FDPS	0.247305	5.08218e-06	5.0803e-05
ENSG00000143384	MCL1	-0.269196	5.10451e-06	5.09947e-05
ENSG00000072958	AP1M1	0.397965	5.11769e-06	5.10948e-05
ENSG00000163141	BNIPL	0.527349	5.1345e-06	5.1231e-05
ENSG00000123374	CDK2	0.279885	5.16485e-06	5.15021e-05
ENSG00000197183	NOL4L	-0.360033	5.21669e-06	5.1987e-05
ENSG00000166900	STX3	-0.264959	5.22906e-06	5.20783e-05
ENSG00000073050	XRCC1	0.304252	5.24117e-06	5.21667e-05
ENSG00000081923	ATP8B1	-0.345014	5.28731e-06	5.25755e-05
ENSG00000067182	TNFRSF1A	-0.316303	5.29103e-06	5.25755e-05
ENSG00000182534	MXRA7	0.763997	5.29198e-06	5.25755e-05
ENSG00000112787	FBRSL1	0.361016	5.33601e-06	5.29804e-05
ENSG00000197375	SLC22A5	-0.28721	5.36623e-06	5.32478e-05
ENSG00000170500	LONRF2	-0.285704	5.40032e-06	5.35532e-05
ENSG00000170906	NDUFA3	0.392687	5.41436e-06	5.36596e-05
ENSG00000089916	GPATCH2L	-0.289697	5.46197e-06	5.40983e-05
ENSG00000204116	CHIC1	-0.513755	5.49673e-06	5.44092e-05
ENSG00000068724	TTC7A	0.347253	5.51011e-06	5.4499e-05
ENSG00000184083	FAM120C	-0.334824	5.51455e-06	5.4499e-05
ENSG00000099994	SUSD2	0.893635	5.5159e-06	5.4499e-05
ENSG00000184900	SUMO3	0.241916	5.57746e-06	5.50515e-05
ENSG00000154122	ANKH	-0.511665	5.57995e-06	5.50515e-05
ENSG00000107669	ATE1	-0.360194	5.58203e-06	5.50515e-05
ENSG00000171431	KRT20	-0.931044	5.59135e-06	5.51098e-05
ENSG00000206075	SERPINB5	-0.884	5.67114e-06	5.58623e-05
ENSG00000126838	PZP	-0.933313	5.72939e-06	5.64017e-05
ENSG00000128581	IFT22	0.314383	5.78315e-06	5.68647e-05
ENSG00000129255	MPDU1	0.308937	5.78345e-06	5.68647e-05
ENSG00000183283	DAZAP2	-0.223822	5.81011e-06	5.70922e-05
ENSG00000003096	KLHL13	-0.408083	5.844e-06	5.73904e-05
ENSG00000113638	TTC33	-0.614831	5.91935e-06	5.8095e-05
ENSG00000148158	SNX30	-0.288713	5.94276e-06	5.82895e-05
ENSG00000107819	SFXN3	0.372423	5.95191e-06	5.83192e-05
ENSG00000148411	NACC2	0.351753	5.95299e-06	5.83192e-05
ENSG00000169258	GPRIN1	0.500954	5.9778e-06	5.85267e-05
ENSG00000130726	TRIM28	0.242153	5.9821e-06	5.85335e-05
ENSG00000169683	LRRC45	0.444701	6.01202e-06	5.87907e-05
ENSG00000170545	SMAGP	-0.38789	6.03319e-06	5.8962e-05
ENSG00000004948	CALCR	0.325424	6.05855e-06	5.91742e-05
ENSG00000165548	TMEM63C	0.761002	6.09485e-06	5.94928e-05
ENSG00000075407	ZNF37A	-0.331063	6.1276e-06	5.97764e-05
ENSG00000204186	ZDBF2	-0.558785	6.13953e-06	5.98567e-05
ENSG00000106733	NMRK1	-0.345142	6.15386e-06	5.99603e-05
ENSG00000169242	EFNA1	0.303479	6.21576e-06	6.04915e-05
ENSG00000143507	DUSP10	-0.561209	6.21585e-06	6.04915e-05
ENSG00000105402	NAPA	0.297162	6.33209e-06	6.15856e-05
ENSG00000117139	KDM5B	0.271027	6.39643e-06	6.21741e-05
ENSG00000141522	ARHGDIA	0.331478	6.46616e-06	6.28141e-05
ENSG00000169692	AGPAT2	0.377295	6.56623e-06	6.37479e-05
ENSG00000146409	SLC18B1	-0.925113	6.58253e-06	6.38679e-05
ENSG00000167863	ATP5H	0.274583	6.6497e-06	6.44809e-05
ENSG00000168938	PPIC	0.303431	6.71868e-06	6.51109e-05
ENSG00000081154	PCNP	-0.303351	6.80035e-06	6.58628e-05
ENSG00000256069	A2MP1	-0.926077	6.82062e-06	6.59952e-05
ENSG00000113658	SMAD5	-0.308175	6.82425e-06	6.59952e-05
ENSG00000164308	ERAP2	-0.923252	6.82625e-06	6.59952e-05
ENSG00000101439	CST3	0.294131	6.93794e-06	6.7035e-05
ENSG00000118058	KMT2A	-0.255768	6.95177e-06	6.71286e-05
ENSG00000260711	RP11-747H7.3	-0.55786	6.96565e-06	6.72225e-05
ENSG00000142634	EFHD2	0.418317	7.0778e-06	6.82641e-05
ENSG00000123144	C19orf43	0.255582	7.1323e-06	6.87488e-05
ENSG00000198625	MDM4	-0.266589	7.14043e-06	6.87694e-05
ENSG00000213853	EMP2	0.228699	7.14294e-06	6.87694e-05
ENSG00000143870	PDIA6	0.237318	7.16151e-06	6.89072e-05
ENSG00000198648	STK39	-0.273117	7.18548e-06	6.90967e-05
ENSG00000101546	RBFA	0.468084	7.19645e-06	6.91611e-05
ENSG00000167112	TRUB2	0.288322	7.2101e-06	6.92512e-05
ENSG00000167645	YIF1B	0.500942	7.26776e-06	6.97636e-05
ENSG00000159069	FBXW5	0.327956	7.27806e-06	6.9821e-05
ENSG00000177646	ACAD9	0.28576	7.30893e-06	7.00757e-05
ENSG00000134291	TMEM106C	0.243082	7.3186e-06	7.01268e-05
ENSG00000204315	FKBPL	0.517047	7.41768e-06	7.10341e-05
ENSG00000163918	RFC4	0.281512	7.46233e-06	7.14195e-05
ENSG00000100292	HMOX1	0.653806	7.46887e-06	7.14398e-05
ENSG00000228340	MIR646HG	-0.651076	7.49079e-06	7.1565e-05
ENSG00000113441	LNPEP	-0.283958	7.4908e-06	7.1565e-05
ENSG00000213160	KLHL23	-0.521273	7.50206e-06	7.16051e-05
ENSG00000215012	C22orf29	0.401944	7.50663e-06	7.16051e-05
ENSG00000164070	HSPA4L	-0.383676	7.50827e-06	7.16051e-05
ENSG00000132507	EIF5A	0.24631	7.51655e-06	7.16418e-05
ENSG00000101412	E2F1	0.348913	7.53022e-06	7.17299e-05
ENSG00000187713	TMEM203	0.338954	7.5394e-06	7.17751e-05
ENSG00000204789	ZNF204P	-0.774844	7.63496e-06	7.26421e-05
ENSG00000170903	MSANTD4	-0.610026	7.64641e-06	7.27083e-05
ENSG00000169570	DTWD2	-0.483084	7.66926e-06	7.28827e-05
ENSG00000172830	SSH3	0.280664	7.68449e-06	7.29846e-05
ENSG00000159199	ATP5G1	0.285847	7.87153e-06	7.47172e-05
ENSG00000198929	NOS1AP	-0.603615	7.94165e-06	7.53386e-05
ENSG00000013364	MVP	-0.372604	7.95938e-06	7.5443e-05
ENSG00000247556	OIP5-AS1	-0.246576	7.96198e-06	7.5443e-05
ENSG00000233997	LINC01425	0.836047	7.97263e-06	NA
ENSG00000115661	STK16	0.35029	8.03052e-06	7.60479e-05
ENSG00000130529	TRPM4	0.402426	8.07261e-06	7.64019e-05
ENSG00000100485	SOS2	-0.280961	8.17278e-06	7.73047e-05
ENSG00000165688	PMPCA	0.295875	8.27479e-06	7.82238e-05
ENSG00000213468	FIRRE	-0.51929	8.30254e-06	7.84403e-05
ENSG00000214029	ZNF891	-0.442983	8.33484e-06	7.86996e-05
ENSG00000172508	CARNS1	0.873995	8.35112e-06	7.88073e-05
ENSG00000174915	PTDSS2	0.416235	8.41074e-06	7.93237e-05
ENSG00000076826	CAMSAP3	0.385932	8.50911e-06	8.02047e-05
ENSG00000167513	CDT1	0.32307	8.74763e-06	8.2405e-05
ENSG00000135838	NPL	-0.872636	8.79292e-06	8.27834e-05
ENSG00000012822	CALCOCO1	-0.294163	8.80653e-06	8.28633e-05
ENSG00000123836	PFKFB2	-0.335545	8.91602e-06	8.38152e-05
ENSG00000145287	PLAC8	0.908363	8.91805e-06	8.38152e-05
ENSG00000165410	CFL2	-0.415897	8.94916e-06	8.40587e-05
ENSG00000260742	RP11-366L5.1	0.713994	8.98225e-06	8.43206e-05
ENSG00000082512	TRAF5	0.303654	8.98937e-06	8.43385e-05
ENSG00000114126	TFDP2	-0.279384	8.99463e-06	8.4339e-05
ENSG00000168140	VASN	0.63104	9.00114e-06	8.43511e-05
ENSG00000254024	KB-1562D12.1	-0.595924	9.01689e-06	8.44499e-05
ENSG00000119943	PYROXD2	0.264302	9.02656e-06	8.44915e-05
ENSG00000101782	RIOK3	-0.317791	9.03714e-06	8.45416e-05
ENSG00000178057	NDUFAF3	0.477128	9.04395e-06	8.45565e-05
ENSG00000143622	RIT1	-0.329836	9.10204e-06	8.50504e-05
ENSG00000151470	C4orf33	-0.560373	9.1201e-06	8.517e-05
ENSG00000280187	CTC-351M12.1	0.544996	9.13124e-06	8.52125e-05
ENSG00000092470	WDR76	0.382134	9.13517e-06	8.52125e-05
ENSG00000182117	NOP10	0.299746	9.15955e-06	8.53906e-05
ENSG00000163660	CCNL1	-0.309502	9.24324e-06	8.61213e-05
ENSG00000116717	GADD45A	-0.380534	9.26346e-06	8.62599e-05
ENSG00000165280	VCP	0.268972	9.28603e-06	8.64204e-05
ENSG00000140104	C14orf79	0.435463	9.56351e-06	8.89516e-05
ENSG00000061938	TNK2	0.348844	9.62891e-06	8.95085e-05
ENSG00000070882	OSBPL3	-0.832781	9.87515e-06	9.17448e-05
ENSG00000187372	PCDHB13	-0.61737	9.89231e-06	9.18515e-05
ENSG00000177427	MIEF2	0.493323	9.91922e-06	9.20485e-05
ENSG00000124151	NCOA3	-0.22615	9.95156e-06	9.22957e-05
ENSG00000119900	OGFRL1	0.432499	9.96004e-06	9.23215e-05
ENSG00000196233	LCOR	-0.315431	1.00869e-05	9.34441e-05
ENSG00000113368	LMNB1	0.234492	1.0116e-05	9.36602e-05
ENSG00000173598	NUDT4	-0.39262	1.01304e-05	9.37391e-05
ENSG00000256433	RP1-102E24.8	-0.700647	1.01517e-05	9.38509e-05
ENSG00000163960	UBXN7	-0.25988	1.0154e-05	9.38509e-05
ENSG00000170473	PYM1	0.326141	1.01706e-05	9.39504e-05
ENSG00000133195	SLC39A11	0.3025	1.0289e-05	9.49409e-05
ENSG00000107521	HPS1	0.325451	1.02896e-05	9.49409e-05
ENSG00000154114	TBCEL	-0.385506	1.03037e-05	9.50171e-05
ENSG00000168137	SETD5	-0.215454	1.03455e-05	9.53483e-05
ENSG00000039523	FAM65A	0.364945	1.0406e-05	9.58033e-05
ENSG00000146950	SHROOM2	0.323002	1.04067e-05	9.58033e-05
ENSG00000176845	METRNL	0.37114	1.04679e-05	9.63121e-05
ENSG00000083799	CYLD	-0.396842	1.04866e-05	9.64161e-05
ENSG00000176340	COX8A	0.323841	1.04912e-05	9.64161e-05
ENSG00000184436	THAP7	0.470299	1.05002e-05	9.64443e-05
ENSG00000113763	UNC5A	0.509086	1.05244e-05	9.66117e-05
ENSG00000163513	TGFBR2	-0.36111	1.05311e-05	9.66187e-05
ENSG00000140395	WDR61	0.267627	1.05438e-05	9.66803e-05
ENSG00000157240	FZD1	0.373334	1.06811e-05	9.78837e-05
ENSG00000157778	PSMG3	0.304947	1.07308e-05	9.82838e-05
ENSG00000272808	RP11-66B24.7	-0.564958	1.076e-05	9.84952e-05
ENSG00000138347	MYPN	-0.862549	1.07741e-05	9.8569e-05
ENSG00000143341	HMCN1	0.20884	1.09939e-05	0.000100523
ENSG00000228544	CCDC183-AS1	0.711051	1.11032e-05	0.000101464
ENSG00000109062	SLC9A3R1	0.26393	1.1133e-05	0.00010168
ENSG00000152234	ATP5A1	0.23923	1.14322e-05	0.000104339
ENSG00000166689	PLEKHA7	-0.293066	1.14371e-05	0.000104339
ENSG00000074416	MGLL	0.323462	1.1482e-05	0.00010469
ENSG00000197958	RPL12	0.225287	1.16129e-05	0.000105824
ENSG00000183648	NDUFB1	0.28575	1.16536e-05	0.000106135
ENSG00000224791	KRT18P39	0.777525	1.17106e-05	0.000106594
ENSG00000104884	ERCC2	0.360398	1.17986e-05	0.000107326
ENSG00000140264	SERF2	0.234512	1.18042e-05	0.000107326
ENSG00000100578	KIAA0586	-0.358416	1.18453e-05	0.000107639
ENSG00000065243	PKN2	-0.291351	1.1928e-05	0.000108329
ENSG00000104427	ZC2HC1A	-0.395674	1.2034e-05	0.000109231
ENSG00000139496	NUP58	-0.28038	1.20741e-05	0.000109533
ENSG00000146243	IRAK1BP1	-0.738759	1.21232e-05	0.000109917
ENSG00000071462	WBSCR22	0.312276	1.21368e-05	0.000109979
ENSG00000100600	LGMN	0.383272	1.21797e-05	0.000110306
ENSG00000169189	NSMCE1	0.3115	1.22396e-05	0.000110755
ENSG00000174373	RALGAPA1	-0.343187	1.2244e-05	0.000110755
ENSG00000247828	TMEM161B-AS1	-0.456819	1.22498e-05	0.000110755
ENSG00000102178	UBL4A	0.327744	1.2292e-05	0.000111074
ENSG00000111341	MGP	-0.288508	1.24042e-05	0.000112026
ENSG00000145022	TCTA	0.462378	1.2439e-05	0.000112277
ENSG00000132780	NASP	0.246494	1.24561e-05	0.000112368
ENSG00000223813	AC007255.8	-0.702939	1.24778e-05	0.000112502
ENSG00000170430	MGMT	0.418379	1.26381e-05	0.000113884
ENSG00000151090	THRB	-0.3727	1.27315e-05	0.000114662
ENSG00000149743	TRPT1	0.419333	1.27432e-05	0.000114703
ENSG00000106245	BUD31	0.251066	1.284e-05	0.00011551
ENSG00000137145	DENND4C	-0.303891	1.30038e-05	0.000116918
ENSG00000071859	FAM50A	0.277348	1.30463e-05	0.000117236
ENSG00000158711	ELK4	-0.285701	1.31377e-05	0.000117992
ENSG00000162599	NFIA	-0.875395	1.31864e-05	0.000118363
ENSG00000100320	RBFOX2	-0.291256	1.32876e-05	0.000119205
ENSG00000068001	HYAL2	0.425929	1.3325e-05	0.000119475
ENSG00000180758	GPR157	0.355138	1.33562e-05	0.00011964
ENSG00000177963	RIC8A	0.288489	1.33582e-05	0.00011964
ENSG00000204434	POTEKP	-0.450849	1.34748e-05	0.000120617
ENSG00000166710	B2M	-0.235501	1.34932e-05	0.000120716
ENSG00000254221	PCDHGB1	-0.596001	1.3637e-05	0.000121934
ENSG00000005700	IBTK	-0.242045	1.36903e-05	0.000122343
ENSG00000133318	RTN3	0.243589	1.37504e-05	0.000122813
ENSG00000185420	SMYD3	0.416973	1.37636e-05	0.000122862
ENSG00000144426	NBEAL1	-0.486801	1.38428e-05	0.000123501
ENSG00000162804	SNED1	0.378663	1.42708e-05	0.000127199
ENSG00000130193	THEM6	0.29786	1.4273e-05	0.000127199
ENSG00000129055	ANAPC13	-0.272851	1.42963e-05	0.000127337
ENSG00000170417	TMEM182	-0.613949	1.4419e-05	0.000128359
ENSG00000267530	LINC01836	0.884882	1.44458e-05	0.000128527
ENSG00000143457	GOLPH3L	-0.281837	1.44602e-05	0.000128584
ENSG00000130724	CHMP2A	0.258469	1.45055e-05	0.000128917
ENSG00000164949	GEM	-0.621406	1.46043e-05	0.000129723
ENSG00000156671	SAMD8	-0.384712	1.47312e-05	0.000130779
ENSG00000234420	ZNF37BP	-0.337013	1.47856e-05	0.00013119
ENSG00000197961	ZNF121	-0.336464	1.48641e-05	0.000131814
ENSG00000177200	CHD9	-0.301998	1.49018e-05	0.000132076
ENSG00000271122	RP11-379H18.1	0.387836	1.49501e-05	0.000132431
ENSG00000162174	ASRGL1	0.467547	1.50156e-05	0.000132939
ENSG00000147689	FAM83A	0.422481	1.50313e-05	0.000132973
ENSG00000099901	RANBP1	0.293849	1.50359e-05	0.000132973
ENSG00000196363	WDR5	0.270089	1.50761e-05	0.000133256
ENSG00000130175	PRKCSH	0.251059	1.52899e-05	0.000135072
ENSG00000101972	STAG2	-0.230042	1.53082e-05	0.00013516
ENSG00000148290	SURF1	0.301274	1.5343e-05	0.000135393
ENSG00000116288	PARK7	0.236375	1.54775e-05	0.000136506
ENSG00000121644	DESI2	-0.323345	1.55572e-05	0.000137134
ENSG00000204540	PSORS1C1	0.867015	1.55872e-05	0.000137323
ENSG00000130560	UBAC1	0.314128	1.56087e-05	0.000137438
ENSG00000141480	ARRB2	0.349752	1.57051e-05	0.000138211
ENSG00000067560	RHOA	0.215288	1.57903e-05	0.000138862
ENSG00000007376	RPUSD1	0.453542	1.57961e-05	0.000138862
ENSG00000085552	IGSF9	0.379652	1.58469e-05	0.000139233
ENSG00000160957	RECQL4	0.348141	1.59854e-05	0.000140318
ENSG00000169047	IRS1	-0.22104	1.59878e-05	0.000140318
ENSG00000147799	ARHGAP39	0.525882	1.61624e-05	0.000141734
ENSG00000091527	CDV3	0.219537	1.61666e-05	0.000141734
ENSG00000101188	NTSR1	0.884076	1.61863e-05	0.000141829
ENSG00000184182	UBE2F	0.487618	1.64965e-05	0.000144469
ENSG00000079739	PGM1	-0.649307	1.65349e-05	0.000144727
ENSG00000175416	CLTB	0.329926	1.66251e-05	0.000145438
ENSG00000204392	LSM2	0.322474	1.66363e-05	0.000145457
ENSG00000119411	BSPRY	0.298923	1.67004e-05	0.000145939
ENSG00000103942	HOMER2	-0.297993	1.67111e-05	0.000145954
ENSG00000014138	POLA2	0.282097	1.67624e-05	0.000146323
ENSG00000125743	SNRPD2	0.267281	1.68726e-05	0.000147191
ENSG00000173137	ADCK5	0.541355	1.68801e-05	0.000147191
ENSG00000178502	KLHL11	-0.671669	1.69949e-05	0.000148113
ENSG00000170689	HOXB9	-0.742722	1.70189e-05	0.000148242
ENSG00000159873	CCDC117	-0.265488	1.70532e-05	0.000148461
ENSG00000204237	OXLD1	0.418736	1.70706e-05	0.000148533
ENSG00000244055	AC007566.10	-0.829437	1.71152e-05	0.000148841
ENSG00000146414	SHPRH	-0.333368	1.7205e-05	0.000149541
ENSG00000178982	EIF3K	0.297711	1.72608e-05	0.000149945
ENSG00000134243	SORT1	-0.253103	1.72702e-05	0.000149946
ENSG00000116001	TIA1	-0.268786	1.72878e-05	0.000150019
ENSG00000127527	EPS15L1	0.258143	1.74252e-05	0.000151131
ENSG00000129451	KLK10	-0.751217	1.75179e-05	0.000151853
ENSG00000130021	PUDP	-0.299761	1.75965e-05	0.000152453
ENSG00000264522	OTUD7B	-0.282143	1.77113e-05	0.000153365
ENSG00000178718	RPP25	0.378725	1.77756e-05	0.00015384
ENSG00000226051	ZNF503-AS1	-0.88333	1.77999e-05	0.000153968
ENSG00000183250	LINC01547	0.484688	1.78342e-05	0.000154182
ENSG00000126267	COX6B1	0.251801	1.79408e-05	0.00015502
ENSG00000109436	TBC1D9	0.209232	1.80348e-05	0.00015575
ENSG00000139505	MTMR6	-0.352681	1.81233e-05	0.00015643
ENSG00000109452	INPP4B	-0.229491	1.826e-05	0.000157526
ENSG00000135837	CEP350	-0.233415	1.82713e-05	0.00015754
ENSG00000167799	NUDT8	0.750591	1.85647e-05	0.000159985
ENSG00000076344	RGS11	0.57458	1.85861e-05	0.000160084
ENSG00000143499	SMYD2	0.390496	1.86421e-05	0.000160481
ENSG00000131650	KREMEN2	0.880305	1.86687e-05	0.000160624
ENSG00000069869	NEDD4	-0.289081	1.87941e-05	0.000161617
ENSG00000174243	DDX23	0.235828	1.88332e-05	0.000161867
ENSG00000184840	TMED9	0.280314	1.88582e-05	0.000161996
ENSG00000153561	RMND5A	-0.256981	1.90031e-05	0.000163155
ENSG00000102265	TIMP1	0.316352	1.92674e-05	0.000165325
ENSG00000013375	PGM3	-0.252884	1.92763e-05	0.000165325
ENSG00000149476	TKFC	0.293838	1.93278e-05	0.000165679
ENSG00000162923	WDR26	-0.241695	1.94349e-05	0.000166509
ENSG00000186318	BACE1	0.248645	1.94787e-05	0.000166796
ENSG00000134698	AGO4	-0.303315	1.9491e-05	0.000166812
ENSG00000174775	HRAS	0.395112	1.95734e-05	0.000167429
ENSG00000090273	NUDC	0.257868	1.97546e-05	0.000168881
ENSG00000163703	CRELD1	0.383028	1.9764e-05	0.000168881
ENSG00000155090	KLF10	-0.222439	1.98809e-05	0.00016979
ENSG00000167889	MGAT5B	0.693314	2.00719e-05	0.000171331
ENSG00000085831	TTC39A	0.254527	2.02218e-05	0.00017252
ENSG00000197345	MRPL21	0.293711	2.02421e-05	0.000172602
ENSG00000227640	SOX21-AS1	-0.857748	2.0356e-05	0.000173394
ENSG00000141068	KSR1	0.361052	2.03564e-05	0.000173394
ENSG00000176022	B3GALT6	0.457103	2.03679e-05	0.0001734
ENSG00000173715	C11orf80	0.29501	2.04756e-05	0.000174226
ENSG00000133962	CATSPERB	-0.751939	2.07485e-05	0.000176455
ENSG00000110080	ST3GAL4	-0.255881	2.07981e-05	0.000176784
ENSG00000110422	HIPK3	-0.325293	2.08099e-05	0.000176791
ENSG00000280138	RP11-463O12.5	-0.641122	2.09032e-05	0.000177436
ENSG00000112414	ADGRG6	0.233917	2.09078e-05	0.000177436
ENSG00000148985	PGAP2	0.418041	2.09642e-05	0.000177822
ENSG00000106460	TMEM106B	-0.321456	2.09976e-05	0.000178012
ENSG00000104413	ESRP1	-0.215071	2.10156e-05	0.000178072
ENSG00000271270	TMCC1-AS1	-0.684183	2.10763e-05	0.000178492
ENSG00000162390	ACOT11	-0.786163	2.10874e-05	0.000178493
ENSG00000186462	NAP1L2	-0.69432	2.1153e-05	0.000178955
ENSG00000229619	MBNL1-AS1	-0.639997	2.12169e-05	0.00017932
ENSG00000176396	EID2	0.485233	2.12184e-05	0.00017932
ENSG00000166348	USP54	-0.347201	2.18709e-05	0.000184738
ENSG00000149485	FADS1	0.238288	2.20939e-05	0.000186525
ENSG00000179148	ALOXE3	0.719907	2.2113e-05	0.000186589
ENSG00000177311	ZBTB38	-0.311112	2.22428e-05	0.000187586
ENSG00000188488	SERPINA5	-0.47082	2.23091e-05	0.000188047
ENSG00000120327	PCDHB14	-0.423754	2.23238e-05	0.000188073
ENSG00000175175	PPM1E	-0.300998	2.23991e-05	0.000188609
ENSG00000164190	NIPBL	-0.224529	2.30128e-05	0.000193664
ENSG00000177283	FZD8	0.795557	2.30233e-05	0.000193664
ENSG00000101421	CHMP4B	0.241746	2.30624e-05	0.000193892
ENSG00000179532	DNHD1	-0.49215	2.31271e-05	0.000194335
ENSG00000109501	WFS1	0.367037	2.31786e-05	0.000194667
ENSG00000110917	MLEC	0.231989	2.32242e-05	0.000194849
ENSG00000100364	KIAA0930	0.406761	2.32244e-05	0.000194849
ENSG00000167700	MFSD3	0.505703	2.34495e-05	0.000196636
ENSG00000124831	LRRFIP1	-0.295427	2.35357e-05	0.000197256
ENSG00000214944	ARHGEF28	-0.368292	2.36928e-05	0.00019847
ENSG00000074603	DPP8	-0.274867	2.38028e-05	0.000199241
ENSG00000162645	GBP2	-0.64305	2.38095e-05	0.000199241
ENSG00000161203	AP2M1	0.222521	2.39906e-05	0.000200653
ENSG00000119917	IFIT3	-0.852379	2.41152e-05	0.000201592
ENSG00000228288	PCAT6	0.774136	2.42205e-05	0.000202367
ENSG00000197217	ENTPD4	-0.28395	2.4278e-05	0.000202713
ENSG00000124181	PLCG1	0.239646	2.4287e-05	0.000202713
ENSG00000236699	ARHGEF38	-0.771663	2.4356e-05	0.000203184
ENSG00000171227	TMEM37	0.852765	2.43985e-05	0.000203334
ENSG00000072506	HSD17B10	0.287042	2.44064e-05	0.000203334
ENSG00000250337	LINC01021	-0.702251	2.44214e-05	0.000203334
ENSG00000232859	LYRM9	0.477092	2.44242e-05	0.000203334
ENSG00000102699	PARP4	-0.313632	2.46847e-05	0.000205397
ENSG00000127249	ATP13A4	0.868063	2.48992e-05	0.000207074
ENSG00000118705	RPN2	0.267148	2.49119e-05	0.000207074
ENSG00000244242	IFITM10	-0.634959	2.50106e-05	0.000207788
ENSG00000117016	RIMS3	0.718981	2.51279e-05	0.000208656
ENSG00000152778	IFIT5	-0.413509	2.51563e-05	0.000208784
ENSG00000101187	SLCO4A1	0.428742	2.52664e-05	0.000209591
ENSG00000004478	FKBP4	0.251683	2.53764e-05	0.000210395
ENSG00000254815	RP11-496I9.1	0.586964	2.55048e-05	0.000211351
ENSG00000168672	FAM84B	-0.222817	2.55306e-05	0.000211457
ENSG00000064666	CNN2	0.388044	2.5586e-05	0.000211733
ENSG00000275964	RP11-61K9.3	0.740759	2.559e-05	0.000211733
ENSG00000119862	LGALSL	-0.472631	2.56047e-05	0.000211746
ENSG00000130713	EXOSC2	0.256031	2.57817e-05	0.0002131
ENSG00000177465	ACOT4	0.465508	2.5838e-05	0.000213393
ENSG00000111696	NT5DC3	-0.30956	2.58434e-05	0.000213393
ENSG00000062822	POLD1	0.354269	2.62776e-05	0.000216867
ENSG00000146007	ZMAT2	0.233134	2.6325e-05	0.000217148
ENSG00000116106	EPHA4	-0.287432	2.63514e-05	0.000217254
ENSG00000075240	GRAMD4	0.396641	2.63986e-05	0.000217533
ENSG00000176490	DIRAS1	0.753452	2.64865e-05	0.000218146
ENSG00000155269	GPR78	-0.815773	2.65303e-05	0.000218396
ENSG00000006756	ARSD	0.277867	2.65998e-05	0.000218857
ENSG00000088970	KIZ	-0.377431	2.66155e-05	0.000218875
ENSG00000123572	NRK	-0.825321	2.66309e-05	0.00021889
ENSG00000196693	ZNF33B	-0.255156	2.6726e-05	0.000219469
ENSG00000262772	LINC01977	0.563118	2.67284e-05	0.000219469
ENSG00000278730	RP11-147L13.11	-0.241197	2.68417e-05	0.000220287
ENSG00000198162	MAN1A2	-0.244442	2.72017e-05	0.000223061
ENSG00000154429	CCSAP	-0.388387	2.72073e-05	0.000223061
ENSG00000129925	TMEM8A	0.326777	2.72471e-05	0.000223274
ENSG00000149929	HIRIP3	0.2664	2.74088e-05	0.000224486
ENSG00000121766	ZCCHC17	0.365708	2.81064e-05	0.000230083
ENSG00000121075	TBX4	-0.766433	2.8269e-05	0.000231297
ENSG00000172818	OVOL1	0.32093	2.83974e-05	0.00023223
ENSG00000066739	ATG2B	-0.242864	2.85492e-05	0.000233354
ENSG00000186174	BCL9L	0.261106	2.85645e-05	0.000233361
ENSG00000157741	UBN2	-0.311637	2.87725e-05	0.000234942
ENSG00000145354	CISD2	0.392432	2.88031e-05	0.000235073
ENSG00000163596	ICA1L	-0.444374	2.88831e-05	0.000235607
ENSG00000069011	PITX1	-0.5721	2.89296e-05	0.000235867
ENSG00000025770	NCAPH2	0.349555	2.9225e-05	0.000238068
ENSG00000151150	ANK3	-0.269755	2.92289e-05	0.000238068
ENSG00000165775	FUNDC2	0.284855	2.98619e-05	0.000243101
ENSG00000001461	NIPAL3	-0.369583	3.0164e-05	0.000245437
ENSG00000166426	CRABP1	0.578492	3.03533e-05	0.000246853
ENSG00000133678	TMEM254	0.289966	3.03964e-05	0.000247079
ENSG00000087365	SF3B2	0.21477	3.0644e-05	0.000248967
ENSG00000261087	KB-1460A1.5	-0.514278	3.06984e-05	0.000249284
ENSG00000169118	CSNK1G1	-0.291532	3.07912e-05	0.000249912
ENSG00000165959	CLMN	-0.280049	3.10662e-05	0.000252018
ENSG00000005889	ZFX	-0.292434	3.11036e-05	0.000252194
ENSG00000171792	RHNO1	0.303715	3.11631e-05	0.000252551
ENSG00000181467	RAP2B	-0.282344	3.13199e-05	0.000253694
[truncated: 4,398 more rows]

## Sheet: CIRP overexpression MCF10
Ensembl_gene_ID	external_gene_name	log2FoldChange_CIRP_vs_Ctrl	pvalue_CIRP_vs_Ctrl	padj_CIRP_vs_Ctrl
ENSG00000102401	ARMCX3	5.46279	1.52749e-116	2.21257e-112
ENSG00000186081	KRT5	2.49333	1.17151e-75	8.48469e-72
ENSG00000147862	NFIB	2.18721	9.9797e-45	4.81853e-41
ENSG00000133110	POSTN	1.97703	6.01573e-38	2.17845e-34
ENSG00000116809	ZBTB17	-1.83978	2.40688e-36	6.97273e-33
ENSG00000205420	KRT6A	1.86895	1.59033e-32	3.83932e-29
ENSG00000136167	LCP1	2.71868	1.67079e-30	3.45735e-27
ENSG00000058085	LAMC2	1.66439	5.70849e-29	1.03359e-25
ENSG00000130005	GAMT	-2.47004	1.5115e-25	2.37675e-22
ENSG00000172572	PDE3A	2.06348	1.64084e-25	2.37675e-22
ENSG00000149418	ST14	1.82695	1.40806e-23	1.85415e-20
ENSG00000039068	CDH1	2.40771	5.06323e-23	6.11174e-20
ENSG00000133247	KMT5C	1.73731	9.15487e-23	1.02006e-19
ENSG00000149591	TAGLN	1.4661	9.73654e-20	1.00738e-16
ENSG00000163739	CXCL1	-1.27022	1.09404e-19	1.05648e-16
ENSG00000081041	CXCL2	-1.30959	2.21563e-19	2.00583e-16
ENSG00000062038	CDH3	1.41776	5.28506e-19	4.50319e-16
ENSG00000099622	CIRBP	1.28488	3.86622e-18	3.11123e-15
ENSG00000081052	COL4A4	1.66893	8.42271e-18	6.42121e-15
ENSG00000147676	MAL2	2.17562	9.484e-18	6.86879e-15
ENSG00000133477	FAM83F	-1.94607	7.77074e-17	5.35996e-14
ENSG00000065618	COL17A1	1.97869	1.07267e-16	7.06253e-14
ENSG00000115221	ITGB6	2.09032	6.79541e-16	4.27963e-13
ENSG00000106078	COBL	1.6662	1.386e-15	8.36508e-13
ENSG00000108602	ALDH3A1	1.81079	4.10034e-15	2.29184e-12
ENSG00000133216	EPHB2	1.55801	4.11376e-15	2.29184e-12
ENSG00000117595	IRF6	1.47853	1.83908e-14	9.86632e-12
ENSG00000151632	AKR1C2	1.34216	1.12599e-13	5.82501e-11
ENSG00000114270	COL7A1	-1.11846	1.20469e-13	6.0172e-11
ENSG00000149573	MPZL2	1.94045	1.25667e-13	6.06764e-11
ENSG00000169432	SCN9A	2.01334	1.38028e-13	6.44949e-11
ENSG00000131711	MAP1B	1.14355	1.68636e-13	7.63343e-11
ENSG00000261150	EPPK1	1.68069	2.28414e-13	1.0026e-10
ENSG00000122861	PLAU	1.46783	2.42219e-13	1.03192e-10
ENSG00000112559	MDFI	1.66745	3.18276e-13	1.31721e-10
ENSG00000104332	SFRP1	1.05783	3.58781e-13	1.4436e-10
ENSG00000167306	MYO5B	1.43184	6.06816e-13	2.3756e-10
ENSG00000178163	ZNF518B	1.95234	9.00179e-13	3.43134e-10
ENSG00000166813	KIF7	-1.2176	1.01988e-12	3.78794e-10
ENSG00000030419	IKZF2	1.42975	1.7745e-12	6.42591e-10
ENSG00000163082	SGPP2	1.3037	2.26384e-12	7.99797e-10
ENSG00000115339	GALNT3	1.38893	4.83369e-12	1.66705e-09
ENSG00000182795	C1orf116	1.54158	4.22462e-11	1.42311e-08
ENSG00000088340	FER1L4	-1.22777	6.35504e-11	2.09211e-08
ENSG00000134824	FADS2	0.960818	8.18723e-11	2.60611e-08
ENSG00000177494	ZBED2	1.60084	8.27621e-11	2.60611e-08
ENSG00000178773	CPNE7	-0.909173	1.22004e-10	3.76006e-08
ENSG00000131737	KRT34	-1.00474	2.17076e-10	6.55072e-08
ENSG00000236017	ASMTL-AS1	-1.32904	2.39565e-10	7.08185e-08
ENSG00000109586	GALNT7	1.04124	3.4775e-10	1.00743e-07
ENSG00000099139	PCSK5	1.59054	3.6075e-10	1.0246e-07
ENSG00000155090	KLF10	1.01452	3.96341e-10	1.10404e-07
ENSG00000276542	RP11-115D19.2	-1.56192	5.00855e-10	1.36885e-07
ENSG00000152056	AP1S3	1.14228	9.43453e-10	2.53073e-07
ENSG00000172493	AFF1	1.05141	9.86921e-10	2.59919e-07
ENSG00000196502	SULT1A1	-1.11094	1.02742e-09	2.65753e-07
ENSG00000112379	ARFGEF3	1.20998	1.15592e-09	2.93745e-07
ENSG00000185436	IFNLR1	1.61033	1.67398e-09	4.18062e-07
ENSG00000268205	CTC-444N24.11	-1.25375	1.72031e-09	4.2235e-07
ENSG00000260257	RP5-1085F17.3	-1.57745	1.8689e-09	4.51183e-07
ENSG00000279192	PWAR5	1.58835	2.62817e-09	6.24084e-07
ENSG00000168056	LTBP3	-0.802746	2.93568e-09	6.7563e-07
ENSG00000213190	MLLT11	0.905483	2.93854e-09	6.7563e-07
ENSG00000186166	CCDC84	-1.0135	3.13167e-09	7.08786e-07
ENSG00000053747	LAMA3	1.01429	3.37692e-09	7.52533e-07
ENSG00000182585	EPGN	1.3055	4.94519e-09	1.08532e-06
ENSG00000078018	MAP2	1.02476	5.33854e-09	1.15416e-06
ENSG00000168143	FAM83B	1.58993	5.76633e-09	1.22831e-06
ENSG00000233589	RP4-694A7.2	-1.10656	7.13521e-09	1.49788e-06
ENSG00000142273	CBLC	1.49838	1.04572e-08	2.16389e-06
ENSG00000134107	BHLHE40	0.896368	1.13942e-08	2.32459e-06
ENSG00000140479	PCSK6	1.03542	1.44847e-08	2.8764e-06
ENSG00000167702	KIFC2	-0.832092	1.44962e-08	2.8764e-06
ENSG00000046604	DSG2	1.01584	1.6111e-08	3.15362e-06
ENSG00000075223	SEMA3C	1.08402	2.11227e-08	4.07949e-06
ENSG00000142102	PGGHG	-0.857749	2.18423e-08	4.16298e-06
ENSG00000110422	HIPK3	1.06625	2.34573e-08	4.41271e-06
ENSG00000137699	TRIM29	0.791432	2.3918e-08	4.4417e-06
ENSG00000011405	PIK3C2A	0.996744	2.66827e-08	4.89238e-06
ENSG00000128567	PODXL	0.92514	3.01451e-08	5.45814e-06
ENSG00000108342	CSF3	-0.967957	3.29935e-08	5.87448e-06
ENSG00000177706	FAM20C	-0.84575	3.33587e-08	5.87448e-06
ENSG00000163734	CXCL3	-1.19571	3.36611e-08	5.87448e-06
ENSG00000150967	ABCB9	-1.07736	3.54667e-08	6.1159e-06
ENSG00000111348	ARHGDIB	1.01151	3.71977e-08	6.33892e-06
ENSG00000133083	DCLK1	1.20416	4.34014e-08	7.3101e-06
ENSG00000265107	GJA5	1.26159	4.80187e-08	7.99483e-06
ENSG00000120756	PLS1	0.988365	5.09662e-08	8.38915e-06
ENSG00000099812	MISP	0.918615	5.3036e-08	8.63176e-06
ENSG00000138829	FBN2	0.950529	6.08006e-08	9.78552e-06
ENSG00000091490	SEL1L3	0.935222	7.29812e-08	1.16168e-05
ENSG00000112972	HMGCS1	0.776281	8.11273e-08	1.27731e-05
ENSG00000164078	MST1R	0.996904	8.51677e-08	1.31266e-05
ENSG00000143382	ADAMTSL4	-0.834445	8.51848e-08	1.31266e-05
ENSG00000068489	PRR11	0.821731	8.84535e-08	1.34868e-05
ENSG00000101670	LIPG	1.14813	9.30452e-08	1.40392e-05
ENSG00000168209	DDIT4	0.845962	1.11362e-07	1.66297e-05
ENSG00000259623	RP11-156E6.1	-1.19185	1.17913e-07	1.74283e-05
ENSG00000177459	ERICH5	1.06423	1.28862e-07	1.88542e-05
ENSG00000141753	IGFBP4	-1.01423	1.3142e-07	1.90363e-05
ENSG00000183421	RIPK4	0.755042	1.43768e-07	2.06187e-05
ENSG00000167767	KRT80	0.919328	1.45921e-07	2.0705e-05
ENSG00000265972	TXNIP	0.87758	1.47229e-07	2.0705e-05
ENSG00000135048	TMEM2	0.895544	1.55192e-07	2.1615e-05
ENSG00000102878	HSF4	-0.984022	1.66893e-07	2.30233e-05
ENSG00000138780	GSTCD	0.963407	1.78589e-07	2.4301e-05
ENSG00000085491	SLC25A24	0.840988	1.7951e-07	2.4301e-05
ENSG00000198089	SFI1	-0.710074	1.85045e-07	2.48183e-05
ENSG00000175265	GOLGA8A	-0.899587	1.96529e-07	2.61167e-05
ENSG00000140396	NCOA2	1.01569	2.09333e-07	2.75654e-05
ENSG00000155974	GRIP1	1.40134	2.22786e-07	2.90726e-05
ENSG00000122862	SRGN	0.813488	2.26645e-07	2.93121e-05
ENSG00000174501	ANKRD36C	1.29923	2.31645e-07	2.96936e-05
ENSG00000163053	SLC16A14	0.937979	2.46513e-07	3.13223e-05
ENSG00000185900	POMK	1.32194	2.48846e-07	3.13437e-05
ENSG00000099194	SCD	0.73235	2.56236e-07	3.19964e-05
ENSG00000198947	DMD	1.01783	3.23064e-07	3.99964e-05
ENSG00000151150	ANK3	1.10494	3.42953e-07	4.2099e-05
ENSG00000269918	AF131215.9	-1.20412	3.62685e-07	4.41469e-05
ENSG00000164877	MICALL2	-0.901371	3.91535e-07	4.72615e-05
ENSG00000247844	CCAT1	1.17066	4.1229e-07	4.93555e-05
ENSG00000197971	MBP	0.936726	4.51318e-07	5.35847e-05
ENSG00000117472	TSPAN1	1.19457	4.8447e-07	5.70533e-05
ENSG00000135116	HRK	0.967236	4.9879e-07	5.82659e-05
ENSG00000134830	C5AR2	1.04523	5.26855e-07	6.1052e-05
ENSG00000086696	HSD17B2	-0.866036	5.38568e-07	6.19139e-05
ENSG00000168077	SCARA3	0.771812	5.66487e-07	6.46107e-05
ENSG00000148926	ADM	-0.794	6.22297e-07	7.04216e-05
ENSG00000259972	AC009120.6	-1.12321	6.35446e-07	7.13522e-05
ENSG00000160781	PAQR6	-0.818495	6.89484e-07	7.68245e-05
ENSG00000197128	ZNF772	1.23938	7.08278e-07	7.81761e-05
ENSG00000120594	PLXDC2	0.836743	7.12519e-07	7.81761e-05
ENSG00000164171	ITGA2	0.944374	7.17806e-07	7.81761e-05
ENSG00000176597	B3GNT5	0.744807	7.24386e-07	7.8304e-05
ENSG00000116675	DNAJC6	0.940718	7.56081e-07	8.11247e-05
ENSG00000139318	DUSP6	0.76315	7.62912e-07	8.12558e-05
ENSG00000245532	NEAT1	-0.752657	8.13479e-07	8.60091e-05
ENSG00000149256	TENM4	1.33778	8.34147e-07	8.75552e-05
ENSG00000251664	PCDHA12	1.21644	8.70196e-07	9.0682e-05
ENSG00000152332	UHMK1	0.775142	8.93416e-07	9.24367e-05
ENSG00000187634	SAMD11	-1.14708	9.86493e-07	0.000101343
ENSG00000100181	TPTEP1	0.935672	1.02168e-06	0.000104218
ENSG00000169992	NLGN2	-0.711156	1.04118e-06	0.000105465
ENSG00000261326	LINC01355	-1.02028	1.05833e-06	0.000106458
ENSG00000138772	ANXA3	0.663308	1.06663e-06	0.000106552
ENSG00000127415	IDUA	-0.904771	1.11902e-06	0.00011102
ENSG00000156535	CD109	0.818171	1.14318e-06	0.000112646
ENSG00000100934	SEC23A	0.877187	1.23693e-06	0.000121061
ENSG00000198780	FAM169A	0.899222	1.25483e-06	0.000121752
ENSG00000051825	MPHOSPH9	0.831823	1.26081e-06	0.000121752
ENSG00000101109	STK4	0.794594	1.36784e-06	0.000130365
ENSG00000113645	WWC1	0.684148	1.368e-06	0.000130365
ENSG00000165288	BRWD3	0.885243	1.40339e-06	0.000132142
ENSG00000139146	FAM60A	0.970933	1.40489e-06	0.000132142
ENSG00000072364	AFF4	0.850034	1.4705e-06	0.000137421
ENSG00000123364	HOXC13	-0.73879	1.4943e-06	0.000138676
ENSG00000133169	BEX1	-1.04952	1.50308e-06	0.000138676
ENSG00000164142	FAM160A1	1.10888	1.54371e-06	0.000141523
ENSG00000125398	SOX9	1.04918	1.56206e-06	0.000142305
ENSG00000115808	STRN	0.843655	1.58192e-06	0.000142496
ENSG00000057294	PKP2	0.934324	1.58383e-06	0.000142496
ENSG00000165449	SLC16A9	1.31027	1.5982e-06	0.0001429
ENSG00000145506	NKD2	-1.28181	1.90806e-06	0.00016956
ENSG00000118898	PPL	0.816427	1.94817e-06	0.000172068
ENSG00000008311	AASS	0.925841	2.01286e-06	0.000176704
ENSG00000162924	REL	1.25346	2.02541e-06	0.000176735
ENSG00000120137	PANK3	0.749104	2.05601e-06	0.000178205
ENSG00000204186	ZDBF2	0.998666	2.06685e-06	0.000178205
ENSG00000189334	S100A14	0.975623	2.1569e-06	0.000184868
ENSG00000171564	FGB	1.25657	2.32058e-06	0.000197727
ENSG00000146858	ZC3HAV1L	1.2067	2.49173e-06	0.000211068
ENSG00000160712	IL6R	0.780689	2.53041e-06	0.000213099
ENSG00000165929	TC2N	1.28091	2.58509e-06	0.000216446
ENSG00000072778	ACADVL	-0.635198	2.65604e-06	0.000221108
ENSG00000260196	RP1-239B22.5	-0.892107	2.75278e-06	0.000227851
ENSG00000136869	TLR4	1.0295	2.77219e-06	0.000228155
ENSG00000272990	RP11-305K5.1	-1.28008	2.79786e-06	0.000228966
ENSG00000178502	KLHL11	1.21762	2.82357e-06	0.000229772
ENSG00000182809	CRIP2	-0.801238	3.06687e-06	0.000248176
ENSG00000102531	FNDC3A	0.876916	3.1104e-06	0.000249981
ENSG00000168769	TET2	0.867461	3.12369e-06	0.000249981
ENSG00000108465	CDK5RAP3	-0.643703	3.14241e-06	0.000250098
ENSG00000268713	CTC-444N24.8	-1.2202	3.21289e-06	0.00025431
ENSG00000115365	LANCL1	0.74158	3.27617e-06	0.00025791
ENSG00000134285	FKBP11	-0.868698	3.35378e-06	0.000262592
ENSG00000181722	ZBTB20	1.24621	3.46337e-06	0.000269715
ENSG00000145734	BDP1	0.866645	3.5541e-06	0.000274771
ENSG00000197989	SNHG12	-0.743251	3.56624e-06	0.000274771
ENSG00000104899	AMH	-0.929355	3.61672e-06	0.000277186
ENSG00000128052	KDR	1.19074	3.73131e-06	0.000284463
ENSG00000124788	ATXN1	0.976451	4.06386e-06	0.000308193
ENSG00000183087	GAS6	-0.630361	4.28544e-06	0.000323305
ENSG00000149289	ZC3H12C	0.786593	4.34854e-06	0.000326365
ENSG00000114127	XRN1	0.774846	4.53874e-06	0.00033814
ENSG00000157107	FCHO2	0.83835	4.55211e-06	0.00033814
ENSG00000225138	CTD-2228K2.7	-0.826494	4.65384e-06	0.000342449
ENSG00000260822	GS1-358P8.4	-0.845503	4.6574e-06	0.000342449
ENSG00000163347	CLDN1	0.935918	4.73553e-06	0.000346435
ENSG00000143970	ASXL2	0.82092	4.76371e-06	0.000346746
ENSG00000273038	RP11-479G22.8	-0.858827	4.8414e-06	0.000350639
ENSG00000123104	ITPR2	0.836323	4.94524e-06	0.000356377
ENSG00000108510	MED13	0.832609	5.11182e-06	0.000366558
ENSG00000124151	NCOA3	0.747708	5.2481e-06	0.000374477
ENSG00000101412	E2F1	-0.774624	5.31489e-06	0.000377384
ENSG00000131584	ACAP3	-0.671555	5.41463e-06	0.00038259
ENSG00000104936	DMPK	-0.704109	5.45356e-06	0.00038347
ENSG00000115648	MLPH	-0.709465	5.4808e-06	0.000383524
ENSG00000091409	ITGA6	0.745498	5.52974e-06	0.000385088
ENSG00000089050	RBBP9	0.789832	5.93019e-06	0.000410999
ENSG00000248383	PCDHAC1	1.21654	6.11276e-06	0.000421635
ENSG00000100836	PABPN1	-0.711951	6.16632e-06	0.000423313
ENSG00000160551	TAOK1	0.762777	6.22948e-06	0.000424262
ENSG00000168438	CDC40	0.784394	6.23871e-06	0.000424262
ENSG00000157680	DGKI	0.818558	6.67975e-06	0.000451015
ENSG00000162688	AGL	0.840163	6.6944e-06	0.000451015
ENSG00000110811	P3H3	0.753855	6.92386e-06	0.000464316
ENSG00000128591	FLNC	1.06668	7.13468e-06	0.000476248
ENSG00000180776	ZDHHC20	0.643585	7.17158e-06	0.000476515
ENSG00000100697	DICER1	0.803513	7.22735e-06	0.000478028
ENSG00000272335	RP11-53O19.3	-1.00818	7.2929e-06	0.000480171
ENSG00000102901	CENPT	-0.641508	7.53212e-06	0.000493677
ENSG00000101104	PABPC1L	-0.769147	7.61922e-06	0.000493975
ENSG00000217930	PAM16	-0.991054	7.65235e-06	0.000493975
ENSG00000150687	PRSS23	0.940348	7.66866e-06	0.000493975
ENSG00000179979	CRIPAK	-0.90906	7.67307e-06	0.000493975
ENSG00000066084	DIP2B	0.742009	7.91868e-06	0.000507531
ENSG00000132635	PCED1A	-0.67583	7.96005e-06	0.000507935
ENSG00000168497	SDPR	0.692192	8.13273e-06	0.000515879
ENSG00000091039	OSBPL8	0.755313	8.15576e-06	0.000515879
ENSG00000163624	CDS1	0.806862	8.27114e-06	0.000520902
ENSG00000275216	RP11-54H7.4	-0.715254	8.37935e-06	0.000525432
ENSG00000128422	KRT17	1.14269	8.43882e-06	0.000526165
ENSG00000168685	IL7R	-0.82139	8.46368e-06	0.000526165
ENSG00000125848	FLRT3	1.01042	8.52024e-06	0.000527418
ENSG00000125844	RRBP1	-0.605139	8.67112e-06	0.000534473
ENSG00000054654	SYNE2	0.798307	8.77042e-06	0.000538303
ENSG00000151012	SLC7A11	0.700421	8.83542e-06	0.000540005
ENSG00000261221	ZNF865	-0.820913	8.90306e-06	0.000540986
ENSG00000162702	ZNF281	0.816485	8.92617e-06	0.000540986
ENSG00000115020	PIKFYVE	0.789655	9.16945e-06	0.000553414
ENSG00000253552	HOXA-AS2	-0.733275	9.81524e-06	0.000589933
ENSG00000168010	ATG16L2	-0.751301	9.9341e-06	0.000594609
ENSG00000198729	PPP1R14C	0.821443	1.00201e-05	0.000595028
ENSG00000087495	PHACTR3	1.12811	1.00233e-05	0.000595028
ENSG00000085719	CPNE3	0.70514	1.02525e-05	0.000606151
ENSG00000110427	KIAA1549L	1.18757	1.07219e-05	0.000631329
ENSG00000135525	MAP7	0.816746	1.09555e-05	0.000642471
ENSG00000121310	ECHDC2	-0.610857	1.11405e-05	0.000650685
ENSG00000138759	FRAS1	1.03921	1.13465e-05	0.000660054
ENSG00000068650	ATP11A	0.845044	1.15957e-05	0.000671853
ENSG00000144366	GULP1	1.06444	1.1704e-05	0.000675428
ENSG00000165732	DDX21	0.738653	1.27134e-05	0.000729186
ENSG00000146247	PHIP	0.746486	1.27362e-05	0.000729186
ENSG00000241484	ARHGAP8	1.19087	1.30851e-05	0.000746213
ENSG00000172379	ARNT2	0.909982	1.34261e-05	0.000762653
ENSG00000163359	COL6A3	-0.776131	1.39133e-05	0.000787241
ENSG00000182700	IGIP	-0.824388	1.41337e-05	0.000792973
ENSG00000136997	MYC	0.607511	1.41472e-05	0.000792973
ENSG00000135976	ANKRD36	1.05957	1.41788e-05	0.000792973
ENSG00000198589	LRBA	0.767384	1.54246e-05	0.00085903
ENSG00000116678	LEPR	0.756377	1.54786e-05	0.00085903
ENSG00000134709	HOOK1	0.83585	1.55486e-05	0.000859625
ENSG00000189280	GJB5	0.823485	1.56651e-05	0.000862769
ENSG00000163625	WDFY3	0.778642	1.57492e-05	0.000864117
ENSG00000269958	RP11-73M18.8	-0.851601	1.58723e-05	0.000867588
ENSG00000107854	TNKS2	0.821917	1.5989e-05	0.000870679
ENSG00000160218	TRAPPC10	0.861035	1.71225e-05	0.000928909
ENSG00000127586	CHTF18	-0.697224	1.73246e-05	0.000933741
ENSG00000075420	FNDC3B	0.730184	1.73716e-05	0.000933741
ENSG00000205213	LGR4	0.786371	1.74114e-05	0.000933741
ENSG00000262580	RP11-334C17.5	-0.916828	1.74694e-05	0.000933741
ENSG00000258297	RP11-658F2.8	-0.8757	1.76275e-05	0.000938729
ENSG00000136010	ALDH1L2	0.743795	1.77142e-05	0.000939891
ENSG00000117569	PTBP2	-0.787162	1.78339e-05	0.000942786
ENSG00000139496	NUP58	0.698081	1.80694e-05	0.000951767
ENSG00000108582	CPD	0.737749	1.82348e-05	0.000956699
ENSG00000228360	RP11-365F18.1	-1.15313	1.82952e-05	0.000956699
ENSG00000218336	TENM3	0.752839	1.85317e-05	0.000965583
ENSG00000243279	PRAF2	-0.754802	1.87772e-05	0.00097449
ENSG00000257315	ZBED6	1.16908	1.88372e-05	0.00097449
ENSG00000023516	AKAP11	0.804361	1.91939e-05	0.000987954
ENSG00000163659	TIPARP	0.687394	1.92339e-05	0.000987954
ENSG00000113742	CPEB4	0.751411	1.93972e-05	0.00099282
ENSG00000133657	ATP13A3	0.748941	1.9545e-05	0.000996863
ENSG00000092295	TGM1	0.871307	1.9888e-05	0.0010108
ENSG00000141858	SAMD1	-0.730881	2.09813e-05	0.00106264
ENSG00000143061	IGSF3	0.724334	2.11816e-05	0.00106905
ENSG00000144815	NXPE3	0.668341	2.14256e-05	0.00107761
ENSG00000164164	OTUD4	0.715375	2.27339e-05	0.00113795
ENSG00000168672	FAM84B	0.840516	2.27826e-05	0.00113795
ENSG00000067082	KLF6	0.611599	2.32958e-05	0.00115959
ENSG00000170734	POLH	0.727191	2.35778e-05	0.00116529
ENSG00000198142	SOWAHC	0.664355	2.36481e-05	0.00116529
ENSG00000196950	SLC39A10	0.735673	2.37192e-05	0.00116529
ENSG00000116663	FBXO6	0.960848	2.37361e-05	0.00116529
ENSG00000033867	SLC4A7	0.747997	2.38638e-05	0.00116529
ENSG00000145390	USP53	0.754924	2.39604e-05	0.00116529
ENSG00000206075	SERPINB5	0.626906	2.39735e-05	0.00116529
ENSG00000166025	AMOTL1	0.710061	2.431e-05	0.00117769
ENSG00000162885	B3GALNT2	0.797644	2.49993e-05	0.00120705
ENSG00000119778	ATAD2B	0.766272	2.53911e-05	0.00121791
ENSG00000248698	LINC01085	-0.865507	2.53924e-05	0.00121791
ENSG00000083168	KAT6A	0.762581	2.55582e-05	0.00122182
ENSG00000272576	RP11-365H22.2	-1.10454	2.58672e-05	0.00123252
ENSG00000132549	VPS13B	0.827329	2.5983e-05	0.00123398
ENSG00000081923	ATP8B1	1.12133	2.60873e-05	0.00123488
ENSG00000198315	ZKSCAN8	0.823391	2.68405e-05	0.0012664
ENSG00000102265	TIMP1	-0.624368	2.73428e-05	0.00128591
ENSG00000179119	SPTY2D1	0.763167	2.84836e-05	0.00133168
ENSG00000163362	C1orf106	1.06711	2.84999e-05	0.00133168
ENSG00000196914	ARHGEF12	0.718341	2.90673e-05	0.00135382
ENSG00000142669	SH3BGRL3	-0.662062	3.00026e-05	0.00139291
ENSG00000260428	SCX	-1.12589	3.04306e-05	0.00140273
ENSG00000113657	DPYSL3	1.03979	3.05626e-05	0.00140273
ENSG00000151458	ANKRD50	0.774358	3.05901e-05	0.00140273
ENSG00000052795	FNIP2	0.860492	3.06682e-05	0.00140273
ENSG00000143751	SDE2	0.668075	3.06982e-05	0.00140273
ENSG00000232931	LINC00342	-0.789071	3.25645e-05	0.00148333
ENSG00000101752	MIB1	0.690588	3.30396e-05	0.00150025
ENSG00000180801	ARSJ	0.764847	3.38373e-05	0.00153166
ENSG00000001629	ANKIB1	0.707338	3.40521e-05	0.00153659
ENSG00000172840	PDP2	0.686671	3.47602e-05	0.00156367
ENSG00000144810	COL8A1	0.742365	3.54868e-05	0.00159066
ENSG00000184441	AP001062.7	-0.962331	3.55798e-05	0.00159066
ENSG00000138413	IDH1	0.601402	3.76089e-05	0.0016762
ENSG00000115183	TANC1	0.804389	3.8865e-05	0.00172687
ENSG00000281183	NPTN-IT1	1.11867	4.01418e-05	0.00177374
ENSG00000275342	PRAG1	-0.668175	4.01786e-05	0.00177374
ENSG00000139725	RHOF	0.628523	4.04869e-05	0.00177374
ENSG00000078401	EDN1	0.90766	4.05159e-05	0.00177374
ENSG00000176658	MYO1D	0.665434	4.05322e-05	0.00177374
ENSG00000138757	G3BP2	0.650801	4.11434e-05	0.00178326
ENSG00000157106	SMG1	0.763766	4.11774e-05	0.00178326
ENSG00000046653	GPM6B	0.997747	4.11996e-05	0.00178326
ENSG00000215301	DDX3X	0.724181	4.1242e-05	0.00178326
ENSG00000213398	LCAT	-0.758541	4.13929e-05	0.00178445
ENSG00000162378	ZYG11B	0.634547	4.20188e-05	0.00180606
ENSG00000150093	ITGB1	0.758888	4.23844e-05	0.00181534
ENSG00000115232	ITGA4	0.916119	4.24853e-05	0.00181534
ENSG00000091436	MAP3K20	0.669573	4.34752e-05	0.00184686
ENSG00000160131	VMA21	-0.667482	4.3478e-05	0.00184686
ENSG00000137962	ARHGAP29	0.747209	4.37215e-05	0.00185177
ENSG00000163349	HIPK1	0.680163	4.54861e-05	0.00192089
ENSG00000155744	FAM126B	0.782952	4.58885e-05	0.00193225
ENSG00000175104	TRAF6	0.79878	4.62292e-05	0.00194096
ENSG00000175197	DDIT3	-0.70724	4.64446e-05	0.00194436
ENSG00000103994	ZNF106	0.706108	4.73272e-05	0.00197561
ENSG00000167615	LENG8	-0.63767	4.80718e-05	0.00200092
ENSG00000167996	FTH1	-0.613379	4.87331e-05	0.00201769
ENSG00000124198	ARFGEF2	0.726865	4.87899e-05	0.00201769
ENSG00000260804	LINC01963	-0.695611	4.89815e-05	0.00201769
ENSG00000160352	ZNF714	0.891442	4.90318e-05	0.00201769
ENSG00000197077	KIAA1671	0.676178	4.92235e-05	0.00201984
ENSG00000186260	MKL2	0.788579	4.9538e-05	0.0020215
ENSG00000110852	CLEC2B	-1.01351	4.96098e-05	0.0020215
ENSG00000151718	WWC2	0.769073	4.97625e-05	0.0020215
ENSG00000168874	ATOH8	-0.645148	4.98222e-05	0.0020215
ENSG00000223705	NSUN5P1	-0.805111	5.00034e-05	0.00202318
ENSG00000150712	MTMR12	0.720965	5.04501e-05	0.00203557
ENSG00000025039	RRAGD	1.10569	5.06391e-05	0.00203752
ENSG00000102218	RP2	0.727749	5.11939e-05	0.00205414
ENSG00000107281	NPDC1	-0.619418	5.22447e-05	0.00209051
ENSG00000177463	NR2C2	0.73677	5.28903e-05	0.00211051
ENSG00000213977	TAX1BP3	-0.895992	5.44723e-05	0.00216767
ENSG00000152413	HOMER1	0.761861	5.51499e-05	0.00218862
ENSG00000213088	ACKR1	-0.57441	5.61669e-05	0.00222289
ENSG00000106780	MEGF9	0.732707	5.87039e-05	0.00231696
ENSG00000126005	MMP24-AS1	-0.620052	5.91441e-05	0.00232799
ENSG00000113161	HMGCR	0.594134	5.97471e-05	0.00234536
ENSG00000134352	IL6ST	0.690369	6.01613e-05	0.00235523
ENSG00000142173	COL6A2	-0.912411	6.04019e-05	0.00235828
ENSG00000269044	CTC-429P9.3	-0.877143	6.25313e-05	0.00243486
ENSG00000155034	FBXL18	0.761681	6.33391e-05	0.00245925
ENSG00000147650	LRP12	0.790953	6.34973e-05	0.00245925
ENSG00000273142	RP11-458F8.4	-0.894817	6.44965e-05	0.00249128
ENSG00000186480	INSIG1	0.576508	6.48625e-05	0.00249876
ENSG00000090054	SPTLC1	0.734617	6.52118e-05	0.00250327
ENSG00000096696	DSP	0.674224	6.54631e-05	0.00250327
ENSG00000104093	DMXL2	0.75323	6.54981e-05	0.00250327
ENSG00000198862	LTN1	0.72134	6.76912e-05	0.00258028
ENSG00000113658	SMAD5	0.603946	6.79831e-05	0.00258461
ENSG00000213949	ITGA1	0.712642	6.82902e-05	0.00258949
ENSG00000167772	ANGPTL4	-0.599436	6.88757e-05	0.00260487
ENSG00000164023	SGMS2	0.68038	6.94222e-05	0.00260945
ENSG00000197323	TRIM33	0.655962	6.95853e-05	0.00260945
ENSG00000273271	AP000254.8	-1.04451	6.96895e-05	0.00260945
ENSG00000164327	RICTOR	0.7312	6.97173e-05	0.00260945
ENSG00000167523	SPATA33	-0.752218	7.02992e-05	0.00262444
ENSG00000213380	COG8	-0.847191	7.12921e-05	0.00265467
ENSG00000123575	FAM199X	0.619444	7.16489e-05	0.00266057
ENSG00000180370	PAK2	0.577633	7.1818e-05	0.00266057
ENSG00000240891	PLCXD2	0.973051	7.24259e-05	0.00267625
ENSG00000196369	SRGAP2B	0.874878	7.28404e-05	0.00268445
ENSG00000153107	ANAPC1	0.707428	7.30185e-05	0.00268445
ENSG00000169504	CLIC4	0.638863	7.40147e-05	0.00271419
ENSG00000172869	DMXL1	0.781331	7.72335e-05	0.00282507
ENSG00000165813	CCDC186	0.73804	7.77844e-05	0.00283435
ENSG00000165240	ATP7A	0.778758	7.78787e-05	0.00283435
ENSG00000138594	TMOD3	0.601987	7.91346e-05	0.00286904
ENSG00000080561	MID2	0.905656	7.92279e-05	0.00286904
ENSG00000130768	SMPDL3B	0.783997	7.97825e-05	0.00288192
ENSG00000105329	TGFB1	-0.566278	8.09999e-05	0.00291184
ENSG00000073756	PTGS2	0.923154	8.1127e-05	0.00291184
ENSG00000087087	SRRT	-0.55152	8.12139e-05	0.00291184
ENSG00000158417	EIF5B	-0.655325	8.23918e-05	0.00294678
ENSG00000259865	RP11-488L18.10	-0.895237	8.29717e-05	0.00296021
ENSG00000165115	KIF27	0.942146	8.3554e-05	0.00297366
ENSG00000107679	PLEKHA1	0.691667	8.52245e-05	0.00302568
ENSG00000130956	HABP4	-0.731158	8.55476e-05	0.00302832
ENSG00000198732	SMOC1	-0.651514	8.58654e-05	0.00302832
ENSG00000111907	TPD52L1	0.700432	8.5926e-05	0.00302832
ENSG00000168779	SHOX2	0.86423	8.73733e-05	0.00307185
ENSG00000280237	MIR4697HG	-0.739857	8.83546e-05	0.00309567
ENSG00000078081	LAMP3	0.930431	8.84783e-05	0.00309567
ENSG00000132031	MATN3	0.693258	8.96299e-05	0.00312841
ENSG00000173442	EHBP1L1	-0.537074	8.98635e-05	0.00312902
ENSG00000235750	KIAA0040	0.606068	9.12405e-05	0.00316935
ENSG00000143756	FBXO28	0.609163	9.21042e-05	0.0031917
ENSG00000104897	SF3A2	-0.606793	9.30161e-05	0.00320866
ENSG00000258199	RP11-977G19.5	-0.796132	9.3104e-05	0.00320866
ENSG00000182871	COL18A1	-0.670979	9.32582e-05	0.00320866
ENSG00000169403	PTAFR	1.05816	9.37147e-05	0.00321672
ENSG00000142910	TINAGL1	0.662144	9.42896e-05	0.00322373
ENSG00000174106	LEMD3	0.750323	9.44614e-05	0.00322373
ENSG00000180667	YOD1	0.705383	9.45865e-05	0.00322373
ENSG00000123358	NR4A1	0.742316	9.48633e-05	0.00322558
ENSG00000163110	PDLIM5	0.563382	9.71381e-05	0.00329424
ENSG00000144959	NCEH1	0.588403	9.73377e-05	0.00329424
ENSG00000138448	ITGAV	0.653811	9.78059e-05	0.00330237
ENSG00000101311	FERMT1	0.624905	9.81637e-05	0.00330675
ENSG00000187498	COL4A1	0.574353	9.85185e-05	0.003311
ENSG00000124225	PMEPA1	0.549116	9.90578e-05	0.00332142
ENSG00000137965	IFI44	-0.67661	9.97918e-05	0.00333261
ENSG00000197429	IPP	0.729964	0.000100001	0.00333261
ENSG00000175352	NRIP3	0.786458	0.000100082	0.00333261
ENSG00000213445	SIPA1	-0.632333	0.000101011	0.00335585
ENSG00000223764	RP11-54O7.3	-0.954616	0.000102609	0.00340113
ENSG00000161249	DMKN	0.648163	0.000103129	0.00340763
ENSG00000134602	STK26	0.634309	0.000103276	0.00340763
ENSG00000138604	GLCE	0.614592	0.000103773	0.00341625
ENSG00000155850	SLC26A2	0.644009	0.000105002	0.00344873
ENSG00000163814	CDCP1	0.595386	0.00010539	0.00344873
ENSG00000198961	PJA2	0.682413	0.000105529	0.00344873
ENSG00000052126	PLEKHA5	0.675365	0.000105712	0.00344873
ENSG00000170153	RNF150	0.825432	0.000106319	0.00345992
ENSG00000105699	LSR	0.646404	0.000106533	0.00345992
ENSG00000113615	SEC24A	0.673794	0.000108247	0.00350772
ENSG00000177200	CHD9	0.711917	0.000108702	0.00351462
ENSG00000114439	BBX	0.656742	0.000109018	0.00351698
ENSG00000150938	CRIM1	0.708543	0.000109364	0.00352031
ENSG00000198087	CD2AP	0.563932	0.000110122	0.00353684
ENSG00000161048	NAPEPLD	0.816052	0.000112686	0.00361086
ENSG00000114450	GNB4	0.568579	0.000112925	0.00361086
ENSG00000169031	COL4A3	1.05448	0.000113202	0.00361173
ENSG00000171163	ZNF692	-0.557073	0.000114508	0.00364538
ENSG00000180902	D2HGDH	-0.584736	0.00011506	0.00365493
ENSG00000138434	SSFA2	0.6819	0.000115357	0.00365634
ENSG00000225828	FAM229A	-0.648739	0.000117229	0.00370755
ENSG00000101439	CST3	-0.629413	0.000117846	0.00371897
ENSG00000164323	CFAP97	0.601125	0.000118729	0.00373117
ENSG00000196387	ZNF140	0.839364	0.000118748	0.00373117
ENSG00000030066	NUP160	0.725977	0.000121254	0.00380166
ENSG00000101972	STAG2	0.654016	0.000122058	0.00381861
ENSG00000156869	FRRS1	0.820452	0.000122881	0.00383607
ENSG00000163633	C4orf36	0.844052	0.000125582	0.00391193
ENSG00000143157	POGK	0.609392	0.000126076	0.00391892
ENSG00000140262	TCF12	0.650127	0.000127129	0.00394317
ENSG00000164951	PDP1	0.810118	0.000128474	0.00397639
ENSG00000104852	SNRNP70	-0.531894	0.000130423	0.0040281
ENSG00000129347	KRI1	-0.55588	0.000134308	0.00413925
ENSG00000134644	PUM1	0.633543	0.000136828	0.00420797
ENSG00000132849	PATJ	0.631959	0.000141977	0.00435706
ENSG00000005810	MYCBP2	0.648128	0.000142419	0.00436138
ENSG00000197530	MIB2	-0.615826	0.000144659	0.00442066
ENSG00000105887	MTPN	0.570092	0.000146388	0.00446407
ENSG00000187079	TEAD1	0.699382	0.000147364	0.00448437
ENSG00000069020	MAST4	0.770416	0.000148303	0.0045035
ENSG00000183401	CCDC159	-0.833119	0.000148919	0.00451275
ENSG00000270647	TAF15	-0.526297	0.000149446	0.00451927
ENSG00000177595	PIDD1	-0.641385	0.000150406	0.00453883
ENSG00000280099	RP11-33E12.2	-0.977182	0.000154065	0.00463956
ENSG00000106133	NSUN5P2	-0.72872	0.000154633	0.00464702
ENSG00000139372	TDG	0.672936	0.000155737	0.0046705
ENSG00000173258	ZNF483	1.01426	0.000156592	0.00468644
ENSG00000244165	P2RY11	-0.763628	0.000162759	0.00485216
ENSG00000164930	FZD6	0.648699	0.000162806	0.00485216
ENSG00000109452	INPP4B	0.682607	0.000163134	0.00485216
ENSG00000157625	TAB3	0.688488	0.000164756	0.00489036
ENSG00000198933	TBKBP1	-0.858456	0.000167322	0.00495637
ENSG00000158615	PPP1R15B	0.582876	0.000168113	0.00496964
ENSG00000165887	ANKRD2	0.594828	0.000171122	0.00504829
ENSG00000157500	APPL1	0.567862	0.000172457	0.00507731
ENSG00000148700	ADD3	0.680977	0.000172851	0.0050786
ENSG00000141449	GREB1L	0.701802	0.000173208	0.00507879
ENSG00000164251	F2RL1	0.602817	0.00017674	0.00517189
ENSG00000156011	PSD3	0.704591	0.00017902	0.00522803
ENSG00000089335	ZNF302	-1.00285	0.000181076	0.00527743
ENSG00000104140	RHOV	0.739926	0.000183164	0.00532479
ENSG00000167685	ZNF444	-0.637309	0.000183436	0.00532479
ENSG00000075702	WDR62	-0.57878	0.000185911	0.00537694
ENSG00000269973	RP11-95D17.1	-0.796511	0.000185975	0.00537694
ENSG00000090339	ICAM1	0.654305	0.000187968	0.00541506
ENSG00000095564	BTAF1	0.733701	0.000188041	0.00541506
ENSG00000115760	BIRC6	0.698233	0.000190484	0.00547453
ENSG00000083857	FAT1	0.69137	0.000191772	0.00550063
ENSG00000129003	VPS13C	0.687172	0.000193745	0.00554249
ENSG00000118200	CAMSAP2	0.677616	0.000193997	0.00554249
ENSG00000163597	SNHG16	-0.669554	0.000194835	0.00555549
ENSG00000196712	NF1	0.641536	0.000195914	0.00557528
ENSG00000154639	CXADR	0.965622	0.000197687	0.00561471
ENSG00000167280	ENGASE	-0.553161	0.000198423	0.00562456
ENSG00000163558	PRKCI	0.572764	0.00020098	0.00568592
ENSG00000133142	TCEAL4	-0.524116	0.000202285	0.00571169
ENSG00000157343	ARMC12	-0.876902	0.000203552	0.0057363
ENSG00000272338	RP11-722E23.2	-0.99624	0.000204684	0.00575699
ENSG00000139354	GAS2L3	0.691442	0.000205575	0.00576509
ENSG00000136874	STX17	0.778575	0.000205968	0.00576509
ENSG00000083312	TNPO1	0.576236	0.000206166	0.00576509
ENSG00000273599	RP11-59C5.3	-0.965526	0.000207592	0.00577482
ENSG00000113594	LIFR	0.70408	0.000207603	0.00577482
ENSG00000171992	SYNPO	-0.552952	0.00020771	0.00577482
ENSG00000101210	EEF1A2	-0.98931	0.000211699	0.00584091
ENSG00000177707	NECTIN3	0.625622	0.000211844	0.00584091
ENSG00000178685	PARP10	-0.560967	0.000211891	0.00584091
ENSG00000070018	LRP6	0.609911	0.000212046	0.00584091
ENSG00000168615	ADAM9	0.641355	0.000212103	0.00584091
ENSG00000224032	EPB41L4A-AS1	-0.562841	0.00021499	0.00590916
ENSG00000109790	KLHL5	0.639374	0.000216739	0.00594596
ENSG00000076826	CAMSAP3	0.762548	0.000218308	0.00597768
ENSG00000255423	EBLN2	1.00429	0.000218927	0.00598332
ENSG00000228393	LINC01004	-0.999171	0.000219723	0.00599377
ENSG00000123636	BAZ2B	0.696848	0.000220846	0.00600535
ENSG00000170456	DENND5B	0.604413	0.000220977	0.00600535
ENSG00000111261	MANSC1	0.757203	0.00022202	0.0060224
ENSG00000123066	MED13L	0.708698	0.000222932	0.00603583
ENSG00000139926	FRMD6	0.628552	0.000227046	0.00613576
ENSG00000141577	CEP131	-0.622328	0.000227572	0.0061385
ENSG00000010072	SPRTN	0.562161	0.000228048	0.00613993
ENSG00000260549	MT1L	-0.659037	0.000231349	0.00621725
ENSG00000197779	ZNF81	0.950979	0.000233431	0.00626158
ENSG00000120129	DUSP1	0.651011	0.000238829	0.00639453
ENSG00000117114	ADGRL2	0.644986	0.000239646	0.00640457
ENSG00000107798	LIPA	0.589713	0.000243119	0.00648541
ENSG00000220205	VAMP2	-0.549455	0.000246427	0.00655938
ENSG00000076321	KLHL20	0.706717	0.000247107	0.00655938
ENSG00000162545	CAMK2N1	-0.599691	0.000247341	0.00655938
ENSG00000176390	CRLF3	0.610973	0.000247703	0.00655938
ENSG00000139505	MTMR6	0.603238	0.000249666	0.00659929
ENSG00000225697	SLC26A6	-0.497245	0.000250287	0.00660364
ENSG00000164975	SNAPC3	0.576798	0.000251792	0.00663128
ENSG00000175471	MCTP1	0.773834	0.00025387	0.00666382
ENSG00000135387	CAPRIN1	0.573859	0.000253947	0.00666382
ENSG00000112787	FBRSL1	-0.586882	0.000255123	0.00668255
ENSG00000172638	EFEMP2	-0.875861	0.000257058	0.0067211
ENSG00000184208	C22orf46	-0.538508	0.000258261	0.00674037
ENSG00000065243	PKN2	0.648761	0.000259055	0.00674894
ENSG00000109654	TRIM2	0.644675	0.000259696	0.00675351
ENSG00000120992	LYPLA1	0.558682	0.00026045	0.00676096
ENSG00000160447	PKN3	-0.708303	0.00026291	0.00681261
ENSG00000198740	ZNF652	-0.627977	0.000264363	0.00683803
ENSG00000162782	TDRD5	0.878455	0.000265641	0.00685855
ENSG00000224078	SNHG14	0.616309	0.000266103	0.00685855
ENSG00000170160	CCDC144A	0.992866	0.000269602	0.00692065
ENSG00000164070	HSPA4L	0.586849	0.000269843	0.00692065
ENSG00000180488	MIGA1	0.65246	0.000269946	0.00692065
ENSG00000109458	GAB1	0.723779	0.000271499	0.00694818
ENSG00000099204	ABLIM1	0.534365	0.000272918	0.00697217
ENSG00000177666	PNPLA2	-0.510308	0.000274114	0.00698146
ENSG00000085788	DDHD2	0.556198	0.000275013	0.00698146
ENSG00000065060	UHRF1BP1	0.628195	0.000275086	0.00698146
ENSG00000011114	BTBD7	0.637343	0.00027521	0.00698146
ENSG00000107036	RIC1	0.659674	0.000276686	0.00700663
ENSG00000074211	PPP2R2C	0.88276	0.000281179	0.00710799
ENSG00000188647	PTAR1	0.609367	0.000281971	0.0071156
ENSG00000110395	CBL	0.619106	0.000284213	0.00715061
ENSG00000196912	ANKRD36B	0.962999	0.000284346	0.00715061
ENSG00000188910	GJB3	0.565515	0.000285504	0.00716729
ENSG00000175745	NR2F1	-0.597084	0.000286733	0.00717628
ENSG00000139517	LNX2	0.63627	0.000286853	0.00717628
ENSG00000130349	C6orf203	-0.687179	0.000287919	0.00718381
ENSG00000119888	EPCAM	0.964993	0.000288146	0.00718381
ENSG00000155545	MIER3	0.649572	0.000289133	0.00719603
ENSG00000100234	TIMP3	0.552015	0.000292705	0.0072716
ENSG00000198959	TGM2	-0.522339	0.000293173	0.0072716
ENSG00000166225	FRS2	0.639143	0.000297675	0.00737065
ENSG00000135269	TES	0.570311	0.000300293	0.00742277
ENSG00000165502	RPL36AL	-0.581692	0.000301496	0.0074398
ENSG00000130522	JUND	-0.707081	0.00030257	0.00745361
ENSG00000174010	KLHL15	0.726058	0.000303813	0.00746727
ENSG00000068796	KIF2A	0.581858	0.000304155	0.00746727
ENSG00000111912	NCOA7	0.60448	0.00030753	0.00753734
ENSG00000076344	RGS11	-0.658643	0.000309715	0.00757807
ENSG00000264112	RP11-159D12.2	-0.594204	0.000311841	0.00761723
ENSG00000228594	FNDC10	-0.72709	0.000313173	0.00763688
ENSG00000248538	RP11-10A14.5	0.979694	0.000315121	0.00767147
ENSG00000151014	NOCT	0.780927	0.000318749	0.00774677
ENSG00000213903	LTB4R	-0.648219	0.000320939	0.00778693
ENSG00000175895	PLEKHF2	0.771238	0.000321983	0.0077992
ENSG00000156531	PHF6	0.647267	0.000324183	0.00783938
ENSG00000111331	OAS3	0.603658	0.000327049	0.0078955
ENSG00000137440	FGFBP1	0.867217	0.000328835	0.00792542
ENSG00000118058	KMT2A	0.634187	0.000330676	0.00795654
ENSG00000005206	SPPL2B	-0.544735	0.000332968	0.00799841
ENSG00000126461	SCAF1	-0.547208	0.000334453	0.00802078
ENSG00000168528	SERINC2	-0.50474	0.000335074	0.0080224
ENSG00000215252	GOLGA8B	-0.587104	0.00033863	0.00809416
ENSG00000158290	CUL4B	0.541694	0.000340443	0.00812407
ENSG00000185522	LMNTD2	-0.807388	0.000347119	0.00826702
ENSG00000263001	GTF2I	0.688773	0.000347643	0.00826702
ENSG00000215788	TNFRSF25	-0.707695	0.000348145	0.00826702
ENSG00000131023	LATS1	0.645695	0.000351526	0.0083297
ENSG00000164291	ARSK	0.69499	0.000351935	0.0083297
ENSG00000197822	OCLN	0.970525	0.000353307	0.00833682
ENSG00000124813	RUNX2	-0.592417	0.000353387	0.00833682
ENSG00000126821	SGPP1	0.631146	0.000359111	0.00845809
ENSG00000250571	GLI4	-0.678517	0.000359821	0.00846106
ENSG00000001630	CYP51A1	0.893108	0.000361407	0.00848458
ENSG00000112297	AIM1	0.578531	0.000363845	0.00852798
ENSG00000135250	SRPK2	0.650001	0.000364847	0.00853765
ENSG00000049759	NEDD4L	0.513443	0.000366216	0.00855586
ENSG00000107186	MPDZ	0.658538	0.000368256	0.00858494
ENSG00000140400	MAN2C1	-0.514746	0.000368646	0.00858494
ENSG00000134324	LPIN1	0.53516	0.000369316	0.00858674
ENSG00000167123	CERCAM	-0.529445	0.000378648	0.00878118
ENSG00000203668	CHML	0.597618	0.000378891	0.00878118
ENSG00000086300	SNX10	0.596891	0.000384355	0.00888679
ENSG00000181827	RFX7	0.682265	0.000384675	0.00888679
ENSG00000144357	UBR3	0.615832	0.000392168	0.00903762
ENSG00000169499	PLEKHA2	0.561363	0.000392671	0.00903762
ENSG00000169592	INO80E	-0.51266	0.000393076	0.00903762
ENSG00000174332	GLIS1	-0.826963	0.000393718	0.00903805
ENSG00000277258	PCGF2	-0.525784	0.000395772	0.00907082
ENSG00000069956	MAPK6	0.603158	0.000398113	0.00911005
ENSG00000197747	S100A10	-0.544038	0.000401699	0.00917762
ENSG00000257093	KIAA1147	0.595725	0.000404604	0.00922942
ENSG00000135596	MICAL1	-0.489884	0.000411931	0.00938179
ENSG00000196083	IL1RAP	0.620797	0.000416131	0.00946256
ENSG00000176624	MEX3C	0.582273	0.000422589	0.00959436
ENSG00000169252	ADRB2	0.62608	0.000424303	0.00961062
ENSG00000064313	TAF2	0.58562	0.000424641	0.00961062
ENSG00000085224	ATRX	0.640006	0.000425682	0.00961062
ENSG00000198265	HELZ	0.582203	0.000425959	0.00961062
ENSG00000146830	GIGYF1	-0.49151	0.000427637	0.00963347
ENSG00000102890	ELMO3	0.636995	0.000428729	0.00964308
ENSG00000085433	WDR47	0.600957	0.000429575	0.00964712
ENSG00000048828	FAM120A	0.557047	0.000433122	0.00970999
ENSG00000267317	CTB-25B13.12	-0.679123	0.000433715	0.00970999
ENSG00000117394	SLC2A1	0.514901	0.000436093	0.00974817
ENSG00000112282	MED23	0.658011	0.000438588	0.00978883
ENSG00000188153	COL4A5	0.626234	0.000441228	0.00983259
ENSG00000113282	CLINT1	0.586715	0.000444423	0.00987985
ENSG00000234498	RPL13AP20	-0.792899	0.000444984	0.00987985
ENSG00000130164	LDLR	0.558424	0.000445395	0.00987985
ENSG00000062716	VMP1	-0.479466	0.000446775	0.00989532
ENSG00000102349	KLF8	0.683268	0.000447629	0.00989908
ENSG00000185630	PBX1	0.698663	0.000453744	0.010019
ENSG00000156273	BACH1	0.575036	0.000459008	0.0101198
ENSG00000081019	RSBN1	0.637715	0.000461807	0.0101661
ENSG00000123977	DAW1	0.616278	0.000467264	0.0102663
ENSG00000156875	MFSD14A	0.936333	0.000467777	0.0102663
ENSG00000184156	KCNQ3	0.653305	0.000469097	0.0102797
ENSG00000197774	EME2	-0.534222	0.00047117	0.0103095
ENSG00000088387	DOCK9	0.642828	0.000474508	0.0103669
ENSG00000104549	SQLE	0.52221	0.000475262	0.0103677
ENSG00000136155	SCEL	0.945879	0.00047724	0.0103952
ENSG00000125846	ZNF133	-0.533004	0.000483477	0.0105153
ENSG00000196507	TCEAL3	-0.536938	0.00048753	0.0105845
ENSG00000177125	ZBTB34	0.678774	0.00048812	0.0105845
ENSG00000099864	PALM	-0.696701	0.000490711	0.0106247
ENSG00000135919	SERPINE2	-0.554663	0.00049581	0.0107191
ENSG00000078747	ITCH	0.561585	0.000500295	0.0108
ENSG00000154217	PITPNC1	0.519238	0.000502312	0.0108183
ENSG00000102125	TAZ	-0.551244	0.00050264	0.0108183
ENSG00000081026	MAGI3	0.693071	0.000504754	0.0108477
ENSG00000150764	DIXDC1	0.71217	0.000505911	0.0108565
ENSG00000058272	PPP1R12A	0.604048	0.000509349	0.0109141
ENSG00000213199	ASIC3	-0.912901	0.000511112	0.0109147
ENSG00000279088	RP11-574K11.24	-0.617668	0.000511454	0.0109147
ENSG00000272579	RP11-101E13.5	-0.941321	0.000511637	0.0109147
ENSG00000228288	PCAT6	-0.820488	0.000516396	0.011
ENSG00000118193	KIF14	0.578164	0.000517257	0.0110022
ENSG00000059758	CDK17	0.605499	0.000521304	0.0110619
ENSG00000165832	TRUB1	0.572547	0.000521876	0.0110619
ENSG00000102189	EEA1	0.666339	0.000522672	0.0110619
ENSG00000213139	CRYGS	-0.87954	0.000523122	0.0110619
ENSG00000162066	AMDHD2	-0.612006	0.000525507	0.0110962
ENSG00000143079	CTTNBP2NL	0.564472	0.00052777	0.0111234
ENSG00000146648	EGFR	0.599423	0.000528331	0.0111234
ENSG00000103168	TAF1C	-0.513251	0.000536012	0.011259
ENSG00000111371	SLC38A1	0.536059	0.00053633	0.011259
ENSG00000118496	FBXO30	0.578475	0.000537191	0.0112608
ENSG00000270157	RP5-894A10.6	0.936496	0.000538647	0.011275
ENSG00000166387	PPFIBP2	-0.8119	0.000541191	0.0113119
ENSG00000134371	CDC73	0.530351	0.000543561	0.0113451
ENSG00000120437	ACAT2	0.47616	0.000548025	0.0114218
ENSG00000127922	SEM1	-0.591587	0.000551041	0.0114682
ENSG00000163539	CLASP2	0.600913	0.000552486	0.0114817
ENSG00000143702	CEP170	0.561658	0.000553419	0.0114846
ENSG00000137845	ADAM10	0.530698	0.000554509	0.0114908
ENSG00000273576	RP11-390P24.1	-0.874244	0.000556704	0.0115198
ENSG00000108256	NUFIP2	0.544666	0.00055771	0.0115241
ENSG00000266094	RASSF5	0.78197	0.000559769	0.0115502
ENSG00000163888	CAMK2N2	-0.74498	0.000561582	0.0115711
ENSG00000210195	MT-TT	-0.679038	0.000564303	0.0116107
ENSG00000204681	GABBR1	-0.527944	0.000572338	0.0117346
ENSG00000011426	ANLN	0.520892	0.000572879	0.0117346
ENSG00000164114	MAP9	0.602755	0.000573007	0.0117346
ENSG00000055609	KMT2C	0.643801	0.000573568	0.0117346
ENSG00000189079	ARID2	0.619324	0.000581938	0.0118891
ENSG00000084733	RAB10	0.495295	0.000583674	0.0119078
ENSG00000165891	E2F7	0.594417	0.000588122	0.0119713
ENSG00000160818	GPATCH4	-0.503195	0.00058844	0.0119713
ENSG00000204217	BMPR2	0.552546	0.00058969	0.011974
ENSG00000102471	NDFIP2	0.498141	0.000590224	0.011974
ENSG00000116903	EXOC8	0.525585	0.000595873	0.0120716
ENSG00000109787	KLF3	0.616928	0.000605271	0.0122449
ENSG00000149927	DOC2A	-0.91825	0.000607134	0.0122488
ENSG00000196091	MYBPC1	-0.824096	0.000607811	0.0122488
ENSG00000204435	CSNK2B	-0.567251	0.000608001	0.0122488
ENSG00000213339	QTRT1	-0.564946	0.000609853	0.0122691
ENSG00000138166	DUSP5	0.51894	0.000611728	0.0122897
ENSG00000102780	DGKH	0.605051	0.000617469	0.0123879
ENSG00000132535	DLG4	-0.596482	0.000622534	0.0124722
ENSG00000145725	PPIP5K2	0.602863	0.000625486	0.012514
ENSG00000225733	FGD5-AS1	0.483269	0.0006303	0.012593
ENSG00000228109	MELTF-AS1	-0.782134	0.000631243	0.0125944
ENSG00000158528	PPP1R9A	0.698288	0.000632871	0.0126095
ENSG00000101850	GPR143	0.920552	0.000641938	0.0127726
ENSG00000150347	ARID5B	0.588659	0.000642828	0.0127728
ENSG00000124107	SLPI	0.727859	0.00064588	0.0128159
ENSG00000145386	CCNA2	0.491132	0.000652872	0.0129369
ENSG00000097096	SYDE2	0.748869	0.000658041	0.0130215
ENSG00000271754	RP3-337H4.9	-0.904597	0.000662061	0.0130832
ENSG00000145604	SKP2	0.517098	0.000669375	0.0132097
ENSG00000171681	ATF7IP	0.548933	0.000670456	0.013213
ENSG00000273373	RP5-1074L1.4	-0.916013	0.000676164	0.013284
ENSG00000109572	CLCN3	0.538432	0.000676382	0.013284
ENSG00000118873	RAB3GAP2	0.531107	0.00067681	0.013284
ENSG00000005801	ZNF195	-0.574487	0.000680422	0.0133368
ENSG00000147642	SYBU	0.605838	0.000682008	0.0133498
ENSG00000104213	PDGFRL	0.679355	0.000689162	0.013445
ENSG00000157450	RNF111	0.566392	0.000689485	0.013445
ENSG00000120063	GNA13	0.636858	0.000689653	0.013445
ENSG00000095261	PSMD5	0.521812	0.00070197	0.0136667
ENSG00000104067	TJP1	0.607573	0.000707491	0.0137557
ENSG00000170340	B3GNT2	0.591292	0.000711089	0.0138071
ENSG00000213281	NRAS	0.489084	0.000714564	0.013856
ENSG00000152894	PTPRK	0.612678	0.000716419	0.0138734
ENSG00000066629	EML1	0.638317	0.000721276	0.0139457
ENSG00000101911	PRPS2	0.486417	0.000722074	0.0139457
ENSG00000169429	CXCL8	-0.608547	0.000725358	0.0139904
ENSG00000133687	TMTC1	0.516519	0.000727179	0.0140069
ENSG00000105519	CAPS	-0.610713	0.000730924	0.0140603
ENSG00000114331	ACAP2	0.555875	0.000733717	0.0140953
ENSG00000197576	HOXA4	-0.866011	0.000736945	0.0141241
ENSG00000276851	RP5-875H18.9	-0.846023	0.00073808	0.0141241
ENSG00000139211	AMIGO2	0.619705	0.000738139	0.0141241
ENSG00000048392	RRM2B	0.522625	0.000745582	0.0142293
ENSG00000131473	ACLY	0.498373	0.000745602	0.0142293
ENSG00000115159	GPD2	0.546724	0.000746623	0.01423
ENSG00000213015	ZNF580	-0.683835	0.000748607	0.0142312
ENSG00000011566	MAP4K3	0.644044	0.000748648	0.0142312
ENSG00000139116	KIF21A	0.56905	0.000759164	0.0144122
ENSG00000261087	KB-1460A1.5	-0.782669	0.000762185	0.0144506
ENSG00000167642	SPINT2	0.521499	0.000765564	0.0144821
ENSG00000169641	LUZP1	0.5817	0.000766131	0.0144821
ENSG00000113638	TTC33	0.640846	0.000766849	0.0144821
ENSG00000178531	CTXN1	-0.784891	0.000772394	0.0145679
ENSG00000177311	ZBTB38	0.608285	0.000776089	0.0146185
ENSG00000105662	CRTC1	-0.549808	0.000778015	0.0146358
ENSG00000196756	SNHG17	-0.584677	0.000781364	0.0146787
ENSG00000143479	DYRK3	0.538578	0.000783987	0.0146787
ENSG00000186567	CEACAM19	-0.641209	0.000784132	0.0146787
ENSG00000088726	TMEM40	0.902484	0.000784348	0.0146787
ENSG00000154127	UBASH3B	0.570575	0.000793166	0.0148029
ENSG00000125484	GTF3C4	0.577437	0.000793452	0.0148029
ENSG00000111670	GNPTAB	0.572844	0.000794053	0.0148029
ENSG00000185432	METTL7A	0.473853	0.000795472	0.0148103
ENSG00000035403	VCL	0.532026	0.000802454	0.0149072
ENSG00000278540	ACACA	0.509933	0.000802737	0.0149072
ENSG00000146414	SHPRH	0.643912	0.00080468	0.0149242
ENSG00000105976	MET	0.539668	0.000805907	0.0149278
ENSG00000007392	LUC7L	-0.486652	0.000810648	0.0149965
ENSG00000171988	JMJD1C	0.581124	0.000812404	0.0150098
ENSG00000132912	DCTN4	0.524232	0.00081527	0.0150436
ENSG00000104689	TNFRSF10A	0.55477	0.000818092	0.0150764
ENSG00000234284	ZNF879	0.744555	0.000820425	NA
ENSG00000247095	MIR210HG	-0.7167	0.000825544	0.0151944
ENSG00000120868	APAF1	0.576538	0.00082934	0.0152375
ENSG00000197381	ADARB1	0.536653	0.000829991	0.0152375
ENSG00000160229	ZNF66	0.743445	0.000830502	NA
ENSG00000141456	PELP1	-0.51419	0.000831574	0.0152473
ENSG00000104907	TRMT1	-0.477422	0.000832747	0.0152474
ENSG00000137393	RNF144B	0.588544	0.000833687	0.0152474
ENSG00000134909	ARHGAP32	0.578522	0.000838115	0.0153091
ENSG00000111799	COL12A1	0.593428	0.00084138	0.0153494
ENSG00000129595	EPB41L4A	0.553382	0.000847901	0.0154489
ENSG00000112186	CAP2	0.548301	0.000856145	0.0155795
ENSG00000102287	GABRE	-0.617026	0.000858444	0.0156017
ENSG00000142583	SLC2A5	-0.704858	0.000864246	0.015654
ENSG00000260296	RP11-395I6.3	-0.909046	0.000864881	0.015654
ENSG00000235194	PPP1R3E	-0.659543	0.000865541	0.015654
ENSG00000130684	ZNF337	-0.503185	0.000865644	0.015654
ENSG00000125503	PPP1R12C	-0.494493	0.00087321	0.0157373
ENSG00000144645	OSBPL10	0.49216	0.000873449	0.0157373
ENSG00000143815	LBR	0.490363	0.000874053	0.0157373
ENSG00000008086	CDKL5	0.688548	0.000874595	0.0157373
ENSG00000124177	CHD6	0.604106	0.000877603	0.0157718
ENSG00000152382	TADA1	0.528772	0.000882975	0.0158487
ENSG00000084093	REST	0.566733	0.000888682	0.0159314
ENSG00000168575	SLC20A2	0.505026	0.000892812	0.0159856
ENSG00000102554	KLF5	0.50793	0.000894719	0.016
ENSG00000133812	SBF2	0.594035	0.00089696	0.0160203
ENSG00000132466	ANKRD17	0.609577	0.000902777	0.0161043
ENSG00000160633	SAFB	-0.502446	0.000907689	0.0161721
ENSG00000182796	TMEM198B	-0.585251	0.000911076	0.0161967
ENSG00000136381	IREB2	0.509241	0.000911309	0.0161967
ENSG00000152104	PTPN14	0.543106	0.00091366	0.0162157
ENSG00000134668	SPOCD1	-0.811056	0.000914619	0.0162157
ENSG00000118564	FBXL5	0.492387	0.000916178	0.0162233
ENSG00000056097	ZFR	0.619824	0.000917284	0.0162233
ENSG00000128563	PRKRIP1	-0.490536	0.00092656	0.0163673
ENSG00000151553	FAM160B1	0.617946	0.000930824	0.0164226
ENSG00000176022	B3GALT6	-0.560216	0.000932122	0.0164255
ENSG00000123091	RNF11	0.536702	0.000937295	0.0164966
ENSG00000128833	MYO5C	0.55233	0.000940565	0.0165341
ENSG00000132780	NASP	-0.501337	0.000943104	0.016542
ENSG00000206538	VGLL3	0.550053	0.000943301	0.016542
ENSG00000280123	RP11-267M23.1	-0.888349	0.000946708	0.0165817
ENSG00000139514	SLC7A1	0.525982	0.000954047	0.0166901
ENSG00000247556	OIP5-AS1	0.505633	0.000960686	0.0167859
ENSG00000124789	NUP153	0.582736	0.000975677	0.0170183
ENSG00000141574	SECTM1	-0.516236	0.000977669	0.0170183
ENSG00000212694	LINC01089	-0.612682	0.000977704	0.0170183
ENSG00000116406	EDEM3	0.593206	0.000978686	0.0170183
ENSG00000160957	RECQL4	-0.485249	0.000982392	0.0170623
ENSG00000197385	ZNF860	0.772421	0.000985171	0.0170785
ENSG00000089327	FXYD5	-0.517072	0.000985682	0.0170785
ENSG00000212907	MT-ND4L	0.573638	0.000987845	0.0170955
ENSG00000272936	RP11-700J17.2	-0.899289	0.000991937	0.017135
ENSG00000065325	GLP2R	0.777057	0.000992495	0.017135
ENSG00000061987	MON2	0.611902	0.000996015	0.0171753
ENSG00000151693	ASAP2	0.553667	0.000998409	0.0171961
ENSG00000166979	EVA1C	-0.511025	0.00100053	0.0172121
ENSG00000077254	USP33	0.53353	0.00100325	0.0172385
ENSG00000134250	NOTCH2	0.580048	0.00100747	0.0172903
ENSG00000170832	USP32	0.621737	0.00100951	0.0172903
ENSG00000172728	FUT10	0.625995	0.00100984	0.0172903
ENSG00000163629	PTPN13	0.606623	0.00101918	0.0174296
ENSG00000124496	TRERF1	0.568478	0.00102352	0.0174832
ENSG00000175467	SART1	-0.50111	0.00102695	0.0175108
ENSG00000079313	REXO1	-0.503397	0.00102799	0.0175108
ENSG00000088448	ANKRD10	-0.491314	0.00102877	0.0175108
ENSG00000102048	ASB9	0.891611	0.001031	0.0175282
ENSG00000158769	F11R	0.47232	0.00103238	0.017531
ENSG00000197603	C5orf42	0.623465	0.00103841	0.0176025
ENSG00000270091	RP11-78O7.2	-0.894982	0.00103966	0.0176025
ENSG00000177570	SAMD12	0.668209	0.00104023	0.0176025
ENSG00000075391	RASAL2	0.602552	0.00104737	0.0177025
ENSG00000038427	VCAN	0.600831	0.00105088	0.0177412
ENSG00000189144	ZNF573	0.885858	0.0010544	0.01778
ENSG00000100731	PCNX1	0.572831	0.00105877	0.0178188
ENSG00000142949	PTPRF	0.473188	0.00105917	0.0178188
ENSG00000184384	MAML2	0.586729	0.00107254	0.0179879
ENSG00000197857	ZNF44	-0.618762	0.0010728	0.0179879
ENSG00000258727	RP11-66N24.3	-0.776592	0.00107323	0.0179879
ENSG00000122691	TWIST1	-0.615677	0.00107418	0.0179879
ENSG00000105726	ATP13A1	-0.462405	0.00107666	0.0180038
ENSG00000197568	HHLA3	-0.721082	0.00107852	0.0180038
ENSG00000099994	SUSD2	0.623669	0.00107929	0.0180038
ENSG00000149043	SYT8	0.859817	0.0010803	0.0180038
ENSG00000185129	PURA	0.556391	0.00108135	0.0180038
ENSG00000133250	ZNF414	-0.678316	0.00108446	0.018035
ENSG00000127870	RNF6	0.577543	0.00108717	0.0180592
ENSG00000061676	NCKAP1	0.572959	0.00108947	0.0180767
ENSG00000179941	BBS10	0.648006	0.00109525	0.0181519
ENSG00000174373	RALGAPA1	0.677349	0.00111183	0.0183899
ENSG00000162817	C1orf115	0.581103	0.00111314	0.0183899
ENSG00000241634	RP11-381E24.1	0.854998	0.00111342	0.0183899
ENSG00000124466	LYPD3	0.714583	0.00111681	0.0184185
ENSG00000077264	PAK3	0.665734	0.0011177	0.0184185
ENSG00000182272	B4GALNT4	-0.499351	0.00112143	0.0184589
ENSG00000154874	CCDC144B	0.889422	0.00112755	0.0185263
ENSG00000228649	AC005682.5	-0.645278	0.00112838	0.0185263
ENSG00000125686	MED1	0.577033	0.00112936	0.0185263
ENSG00000038274	MAT2B	0.478711	0.00113286	0.0185628
ENSG00000143416	SELENBP1	-0.500159	0.00113554	0.0185856
ENSG00000143674	MAP3K21	0.546303	0.00114414	0.0187053
ENSG00000132182	NUP210	0.472012	0.00115222	0.0188162
ENSG00000151320	AKAP6	0.837927	0.00115661	0.0188659
ENSG00000180917	CMTR2	0.543857	0.00115787	0.0188659
ENSG00000263731	RP11-498C9.15	-0.879816	0.00116618	0.0189799
ENSG00000139971	C14orf37	0.880928	0.0011712	0.0190109
ENSG00000115295	CLIP4	0.535341	0.00117174	0.0190109
ENSG00000103067	ESRP2	0.493761	0.00117202	0.0190109
ENSG00000107485	GATA3	-0.483304	0.00118012	0.0191209
ENSG00000105866	SP4	0.703574	0.00118644	0.0192018
ENSG00000107669	ATE1	0.528921	0.00119411	0.0192927
ENSG00000196757	ZNF700	-0.587774	0.00119557	0.0192927
ENSG00000188878	FBF1	-0.672907	0.00119605	0.0192927
ENSG00000242861	RP11-285F7.2	-0.834089	0.00120043	0.0193417
ENSG00000142556	ZNF614	0.642739	0.00121791	0.0196016
ENSG00000173281	PPP1R3B	0.50889	0.00122163	0.0196396
ENSG00000144909	OSBPL11	0.593799	0.00122424	0.0196598
ENSG00000149485	FADS1	0.462687	0.00122689	0.0196806
ENSG00000184194	GPR173	-0.582423	0.00123117	0.0197204
ENSG00000112992	NNT	0.5962	0.0012351	0.0197204
ENSG00000257704	INAFM1	-0.750921	0.00123717	0.0197204
ENSG00000272750	RP11-378J18.8	-0.777979	0.00123718	0.0197204
ENSG00000261286	RP11-517C16.2	-0.710122	0.00123747	0.0197204
ENSG00000134899	ERCC5	0.842435	0.00123755	0.0197204
ENSG00000134590	FAM127A	-0.4598	0.00123971	0.0197205
ENSG00000196526	AFAP1	0.518243	0.00124027	0.0197205
ENSG00000056586	RC3H2	0.483038	0.00124211	0.019728
ENSG00000121753	ADGRB2	-0.60842	0.00125414	0.0198972
ENSG00000132294	EFR3A	0.554421	0.00126195	0.0199993
ENSG00000197415	VEPH1	0.829619	0.00126398	0.0200096
ENSG00000167670	CHAF1A	-0.460984	0.0012671	0.0200311
ENSG00000160360	GPSM1	-0.504067	0.00126811	0.0200311
ENSG00000064393	HIPK2	0.54517	0.00127054	0.0200383
ENSG00000239407	LL0XNC01-237H1.2	0.87439	0.00127133	0.0200383
ENSG00000151239	TWF1	0.588002	0.00127729	0.0201103
ENSG00000162004	CCDC78	-0.818441	0.00128353	0.0201866
ENSG00000132356	PRKAA1	0.511659	0.00128635	0.0202091
ENSG00000111816	FRK	0.792522	0.00129166	0.0202616
ENSG00000172380	GNG12	0.462815	0.0012928	0.0202616
ENSG00000112531	QKI	0.507468	0.00129389	0.0202616
ENSG00000078900	TP73	-0.864356	0.00129788	0.0203021
ENSG00000226887	ERVMER34-1	0.619709	0.00131335	0.020522
ENSG00000227500	SCAMP4	-0.448122	0.00131798	0.0205721
ENSG00000133731	IMPA1	0.556946	0.00132937	0.0207276
ENSG00000077274	CAPN6	0.871562	0.00134367	0.0209281
ENSG00000108946	PRKAR1A	0.473494	0.00135081	0.0209926
ENSG00000166897	ELFN2	-0.614785	0.00135098	0.0209926
ENSG00000176542	USF3	0.592755	0.00135217	0.0209926
ENSG00000130254	SAFB2	-0.484125	0.00135546	0.0210203
ENSG00000105983	LMBR1	0.534475	0.00135685	0.0210203
ENSG00000102024	PLS3	0.472478	0.00136611	0.0211392
ENSG00000137942	FNBP1L	0.530203	0.00136745	0.0211392
ENSG00000177732	SOX12	-0.513862	0.00137257	0.0211958
ENSG00000178719	GRINA	-0.4212	0.0013819	0.0213172
ENSG00000161671	EMC10	-0.48863	0.00139444	0.0214877
ENSG00000164542	KIAA0895	0.635494	0.00140032	0.0215555
ENSG00000243232	PCDHAC2	0.869482	0.00140778	0.0216472
ENSG00000131873	CHSY1	0.517176	0.00141026	0.0216624
ENSG00000147437	GNRH1	-0.708385	0.00141195	0.0216653
ENSG00000134757	DSG3	0.789984	0.00143039	0.0219251
ENSG00000066933	MYO9A	0.534163	0.00143308	0.0219379
ENSG00000197969	VPS13A	0.56959	0.00143425	0.0219379
ENSG00000113712	CSNK1A1	0.493921	0.00143923	0.0219907
ENSG00000156711	MAPK13	0.677045	0.00144207	0.022011
ENSG00000177485	ZBTB33	0.569104	0.00144682	0.0220602
ENSG00000141429	GALNT1	0.48578	0.00146045	0.0222446
ENSG00000100344	PNPLA3	0.698377	0.00146495	0.0222897
ENSG00000188760	TMEM198	-0.714339	0.00147008	0.0223286
ENSG00000138641	HERC3	0.604616	0.00147059	0.0223286
ENSG00000102753	KPNA3	0.517506	0.00147221	0.0223298
ENSG00000175505	CLCF1	-0.528352	0.00147773	0.0223901
ENSG00000164168	TMEM184C	0.538536	0.00148037	0.0224067
ENSG00000182224	CYB5D1	0.783715	0.00148282	0.0224076
ENSG00000281332	LINC00997	-0.741321	0.00148388	0.0224076
ENSG00000179862	CITED4	-0.710827	0.00148508	0.0224076
ENSG00000138593	SECISBP2L	0.591279	0.00149244	0.0224954
ENSG00000150768	DLAT	0.464982	0.00149937	0.0225763
ENSG00000104447	TRPS1	0.51559	0.00150399	0.0226079
ENSG00000272602	ZNF595	0.532988	0.00150459	0.0226079
ENSG00000172340	SUCLG2	0.450784	0.0015089	0.0226492
ENSG00000139793	MBNL2	0.521428	0.00151173	0.0226681
ENSG00000163249	CCNYL1	0.545671	0.00151868	0.0227488
ENSG00000176182	MYPOP	-0.631078	0.00152205	0.0227757
ENSG00000066739	ATG2B	0.566066	0.00152869	0.0228514
ENSG00000169228	RAB24	-0.727022	0.0015308	0.0228594
ENSG00000127419	TMEM175	-0.539738	0.00153753	0.0229363
ENSG00000270225	MTCO2P22	-0.846748	0.00153944	0.0229412
ENSG00000137693	YAP1	0.525576	0.00154202	0.022956
ENSG00000269352	PTOV1-AS2	-0.760071	0.00154701	0.022989
ENSG00000054793	ATP9A	0.56605	0.00154741	0.022989
ENSG00000274383	CTD-2017F17.2	-0.851392	0.00156822	0.0232742
ENSG00000108773	KAT2A	-0.433153	0.00157016	0.0232791
ENSG00000141425	RPRD1A	0.463248	0.0015775	0.0233641
ENSG00000105048	TNNT1	-0.547052	0.00158304	0.0234222
ENSG00000147894	C9orf72	0.6349	0.00158554	0.0234352
ENSG00000076770	MBNL3	0.602301	0.00159204	0.0235073
ENSG00000185324	CDK10	-0.452683	0.00159555	0.0235352
ENSG00000137075	RNF38	0.517878	0.00160356	0.0236292
ENSG00000114302	PRKAR2A	0.482005	0.00161155	0.0237229
ENSG00000115091	ACTR3	0.416618	0.0016168	0.0237598
ENSG00000185728	YTHDF3	0.465811	0.00161734	0.0237598
ENSG00000157224	CLDN12	0.584685	0.00161951	0.0237676
ENSG00000089916	GPATCH2L	0.49506	0.00162355	0.0238027
ENSG00000138688	KIAA1109	0.600736	0.00162808	0.0238353
ENSG00000079459	FDFT1	0.425559	0.00162906	0.0238353
ENSG00000224976	PARP4P2	0.856893	0.00163906	0.0239401
ENSG00000213047	DENND1B	0.541275	0.00163953	0.0239401
ENSG00000157827	FMNL2	0.570944	0.00164867	0.0240412
ENSG00000172845	SP3	0.493278	0.00164977	0.0240412
ENSG00000189308	LIN54	0.538131	0.00165233	0.0240543
ENSG00000131019	ULBP3	0.807426	0.00165589	0.0240716
ENSG00000035499	DEPDC1B	0.48845	0.00165685	0.0240716
ENSG00000129116	PALLD	0.478362	0.00166265	0.0241002
ENSG00000140575	IQGAP1	0.530348	0.00166425	0.0241002
ENSG00000116141	MARK1	0.58368	0.00166482	0.0241002
ENSG00000145362	ANK2	0.589314	0.00166547	0.0241002
ENSG00000228560	RP11-550P17.5	-0.480801	0.00167372	0.0241745
ENSG00000215440	NPEPL1	-0.640201	0.00167394	0.0241745
ENSG00000064042	LIMCH1	0.569503	0.00168699	0.0243306
ENSG00000151612	ZNF827	0.675789	0.00168811	0.0243306
ENSG00000186205	MARC1	0.570398	0.00169002	0.024334
ENSG00000085832	EPS15	0.472425	0.00169473	0.0243541
ENSG00000143457	GOLPH3L	0.500718	0.00169478	0.0243541
ENSG00000119640	ACYP1	-0.627948	0.00169712	0.0243636
ENSG00000117036	ETV3	0.498215	0.00170036	0.0243858
ENSG00000172466	ZNF24	0.466053	0.00171135	0.0245192
ENSG00000173511	VEGFB	-0.51488	0.00172278	0.0246586
ENSG00000144048	DUSP11	0.483333	0.00172742	0.0246853
ENSG00000144724	PTPRG	0.580955	0.00172805	0.0246853
ENSG00000164754	RAD21	0.448275	0.00173224	0.0247207
ENSG00000174943	KCTD13	-0.541029	0.00174397	0.0248614
ENSG00000120549	KIAA1217	0.520896	0.00174554	0.0248614
ENSG00000241975	ELOCP19	0.854661	0.0017555	0.0249787
ENSG00000053254	FOXN3	0.551475	0.00175785	0.0249876
ENSG00000143847	PPFIA4	-0.726964	0.00176063	0.0250027
ENSG00000197375	SLC22A5	0.472642	0.00177632	0.0252008
ENSG00000196923	PDLIM7	-0.464423	0.00178495	0.0252984
ENSG00000159140	SON	0.523545	0.00178763	0.0253067
ENSG00000100918	REC8	-0.773819	0.00178903	0.0253067
ENSG00000198876	DCAF12	0.516749	0.0017964	0.0253861
ENSG00000071537	SEL1L	0.509373	0.001803	0.0254306
ENSG00000121274	PAPD5	0.549259	0.00180528	0.0254306
ENSG00000126561	STAT5A	-0.798466	0.00180618	0.0254306
ENSG00000145555	MYO10	0.503222	0.001809	0.0254306
ENSG00000163513	TGFBR2	0.523856	0.00180999	0.0254306
ENSG00000173432	SAA1	-0.664258	0.00181011	0.0254306
ENSG00000166311	SMPD1	-0.46693	0.00181183	0.0254306
ENSG00000261373	VPS9D1-AS1	-0.508587	0.00181428	0.0254403
ENSG00000185236	RAB11B	-0.480041	0.0018235	0.0255448
ENSG00000067900	ROCK1	0.522921	0.00182643	0.0255464
ENSG00000162825	NBPF20	-0.743058	0.00182799	0.0255464
ENSG00000120690	ELF1	0.533179	0.0018289	0.0255464
ENSG00000070190	DAPP1	0.848938	0.00183305	0.0255797
ENSG00000018408	WWTR1	0.474336	0.00184471	0.0256926
ENSG00000104219	ZDHHC2	0.53243	0.00184593	0.0256926
ENSG00000163681	SLMAP	0.471322	0.00184646	0.0256926
ENSG00000147649	MTDH	0.504718	0.00184969	0.0257068
ENSG00000169116	PARM1	-0.791722	0.00185103	0.0257068
ENSG00000198467	TPM2	-0.487562	0.00185417	0.0257257
ENSG00000180448	ARHGAP45	-0.463058	0.00185772	0.0257293
ENSG00000054523	KIF1B	0.53937	0.00185798	0.0257293
ENSG00000255198	SNHG9	-0.705484	0.00187191	0.0258975
ENSG00000170846	AC093323.3	-0.593788	0.00187404	0.0259022
ENSG00000151388	ADAMTS12	0.695415	0.00187583	0.0259022
ENSG00000010818	HIVEP2	0.600824	0.00188141	0.0259545
ENSG00000123268	ATF1	0.482534	0.00188365	0.0259607
ENSG00000004777	ARHGAP33	-0.662491	0.0018974	0.0260832
ENSG00000115421	PAPOLG	0.59237	0.00189975	0.0260832
ENSG00000115084	SLC35F5	0.568401	0.00190055	0.0260832
ENSG00000275185	RP13-753N3.3	-0.82375	0.00190222	0.0260832
ENSG00000128564	VGF	-0.847396	0.00190442	0.0260832
ENSG00000198353	HOXC4	-0.718643	0.00190509	0.0260832
ENSG00000166012	TAF1D	-0.446109	0.00190515	0.0260832
ENSG00000199753	SNORD104	-0.78618	0.00192608	0.026345
ENSG00000074657	ZNF532	0.575645	0.00193089	0.0263857
ENSG00000133401	PDZD2	0.557133	0.00193354	0.0263917
ENSG00000158092	NCK1	0.536313	0.00193592	0.0263917
ENSG00000066422	ZBTB11	0.62714	0.00193765	0.0263917
ENSG00000109906	ZBTB16	0.631553	0.00193937	0.0263917
ENSG00000139624	CERS5	-0.449253	0.00194209	0.0263917
ENSG00000143387	CTSK	-0.576333	0.00194225	0.0263917
ENSG00000188419	CHM	0.550361	0.0019474	0.0264368
ENSG00000188641	DPYD	0.576617	0.00195361	0.0264738
ENSG00000183963	SMTN	-0.469577	0.00195378	0.0264738
ENSG00000149503	INCENP	0.512778	0.00196187	0.0265586
ENSG00000063169	GLTSCR1	-0.557608	0.00197416	0.0266999
ENSG00000166128	RAB8B	0.553366	0.00197757	0.0266999
ENSG00000115306	SPTBN1	0.521036	0.00197784	0.0266999
ENSG00000170185	USP38	0.554066	0.00198905	0.0268133
ENSG00000179104	TMTC2	0.661558	0.00198994	0.0268133
ENSG00000156675	RAB11FIP1	0.496971	0.00201335	0.0271035
ENSG00000117984	CTSD	-0.45686	0.00203342	0.0273483
ENSG00000137822	TUBGCP4	0.482881	0.0020532	0.0275887
ENSG00000260260	SNHG19	-0.614392	0.00206364	0.0277032
ENSG00000168172	HOOK3	0.496853	0.0020699	0.0277473
ENSG00000122042	UBL3	0.510013	0.00207075	0.0277473
ENSG00000144040	SFXN5	-0.497747	0.00208519	0.027915
ENSG00000156162	DPY19L4	0.512595	0.00212571	0.0284311
ENSG00000135776	ABCB10	0.54612	0.00213175	0.0284627
ENSG00000170961	HAS2	0.798002	0.00213301	0.0284627
ENSG00000148690	FRA10AC1	-0.571929	0.00213396	0.0284627
ENSG00000235989	MORC2-AS1	-0.835906	0.00216236	0.0287892
ENSG00000142156	COL6A1	-0.450414	0.00216304	0.0287892
ENSG00000137834	SMAD6	-0.676798	0.00216441	0.0287892
ENSG00000150995	ITPR1	0.651971	0.00216772	0.0288065
ENSG00000111077	TNS2	-0.416234	0.00216969	0.0288065
ENSG00000101596	SMCHD1	0.511656	0.00218541	0.0289779
ENSG00000177058	SLC38A9	0.548877	0.0021866	0.0289779
ENSG00000160323	ADAMTS13	-0.759386	0.00219468	0.0290584
ENSG00000155304	HSPA13	0.537808	0.00220245	0.0291127
ENSG00000100592	DAAM1	0.466477	0.00220422	0.0291127
ENSG00000225470	JPX	-0.497505	0.00220481	0.0291127
ENSG00000071967	CYBRD1	0.534473	0.0022139	0.0292061
ENSG00000225383	SFTA1P	0.682437	0.00222105	0.0292738
ENSG00000135506	OS9	-0.423749	0.00222903	0.0293523
ENSG00000137770	CTDSPL2	0.514957	0.00223691	0.0294292
ENSG00000198162	MAN1A2	0.480714	0.00225386	0.0296254
ENSG00000152944	MED21	0.511086	0.0022599	0.0296778
ENSG00000132274	TRIM22	0.568427	0.00226321	0.0296944
ENSG00000198840	MT-ND3	-0.518982	0.00227548	0.0298251
ENSG00000122008	POLK	0.52593	0.00227729	0.0298251
ENSG00000006016	CRLF1	-0.8255	0.00228965	0.0299599
ENSG00000174791	RIN1	-0.533488	0.00229323	0.0299797
ENSG00000267100	ILF3-AS1	-0.646652	0.00230066	0.0300497
ENSG00000058668	ATP2B4	0.512568	0.00230585	0.0300903
ENSG00000085276	MECOM	0.566792	0.00232276	0.0302626
ENSG00000179588	ZFPM1	-0.678469	0.00232373	0.0302626
ENSG00000184517	ZFP1	0.608809	0.00232532	0.0302626
ENSG00000090238	YPEL3	-0.508219	0.00233554	0.0303683
ENSG00000177508	IRX3	-0.535665	0.0023507	0.0305381
ENSG00000148429	USP6NL	0.48397	0.0023616	0.0306521
ENSG00000198561	CTNND1	0.488881	0.00236491	0.0306564
ENSG00000254901	BORCS8	-0.558319	0.00236616	0.0306564
ENSG00000137992	DBT	0.516908	0.00236867	0.0306614
ENSG00000261662	RP5-1042I8.7	-0.779972	0.00238113	0.0307738
ENSG00000196436	NPIPB15	-0.779669	0.00238217	0.0307738
ENSG00000160949	TONSL	-0.425349	0.00238372	0.0307738
ENSG00000084636	COL16A1	-0.69433	0.00238961	0.0308224
ENSG00000064205	WISP2	-0.475469	0.00239531	0.0308451
ENSG00000116539	ASH1L	0.567596	0.00239563	0.0308451
ENSG00000131470	PSMC3IP	-0.522792	0.00240198	0.0308993
ENSG00000247626	MARS2	0.640526	0.00240427	0.0309013
ENSG00000161912	ADCY10P1	-0.74954	0.00240692	0.0309081
ENSG00000108506	INTS2	0.572302	0.00241659	0.0309778
ENSG00000183814	LIN9	0.524533	0.00241663	0.0309778
ENSG00000100068	LRP5L	-0.62627	0.00244048	0.0312558
ENSG00000168395	ING5	-0.446982	0.00245302	0.0313887
ENSG00000171150	SOCS5	0.554936	0.00247114	0.0315926
ENSG00000124882	EREG	-0.611657	0.00247912	0.0316657
ENSG00000073910	FRY	0.618417	0.00248123	0.0316657
ENSG00000145990	GFOD1	0.566158	0.00248934	0.0317413
ENSG00000269825	CTD-3099C6.9	0.808319	0.00251002	0.0319768
ENSG00000095321	CRAT	-0.499665	0.00251626	0.0319882
ENSG00000095015	MAP3K1	0.609789	0.00251674	0.0319882
ENSG00000137434	C6orf52	0.799143	0.00251754	0.0319882
ENSG00000136021	SCYL2	0.545723	0.00252113	0.0320057
ENSG00000182827	ACBD3	0.453255	0.00252727	0.0320421
ENSG00000232442	CTD-3184A7.4	-0.689141	0.00252858	0.0320421
ENSG00000112739	PRPF4B	0.468171	0.00253216	0.0320421
ENSG00000166825	ANPEP	-0.397416	0.0025336	0.0320421
ENSG00000132603	NIP7	0.449185	0.00253505	0.0320421
ENSG00000167930	FAM234A	-0.454447	0.0025378	0.0320488
ENSG00000248019	FAM13A-AS1	-0.7414	0.00254539	0.0321166
ENSG00000072041	SLC6A15	0.496194	0.00254888	0.0321297
ENSG00000213462	ERV3-1	0.708211	0.00255086	0.0321297
ENSG00000066926	FECH	0.431545	0.00255847	0.0321896
ENSG00000167378	IRGQ	-0.47119	0.00256006	0.0321896
ENSG00000259605	AC074212.5	-0.757186	0.00257764	0.0323696
ENSG00000029153	ARNTL2	0.457937	0.00257884	0.0323696
ENSG00000162601	MYSM1	0.53	0.0025913	0.0324979
ENSG00000224470	ATXN1L	0.52406	0.00260675	0.0326181
ENSG00000014123	UFL1	0.507974	0.0026074	0.0326181
ENSG00000139132	FGD4	0.479395	0.00260832	0.0326181
ENSG00000102317	RBM3	0.401891	0.00261068	0.0326181
ENSG00000110002	VWA5A	0.589132	0.00261215	0.0326181
ENSG00000138071	ACTR2	0.425775	0.00261796	0.0326625
ENSG00000130449	ZSWIM6	0.525574	0.0026208	0.0326697
ENSG00000205903	ZNF316	-0.457642	0.00262607	0.0327073
ENSG00000104957	CCDC130	-0.481579	0.00263229	0.0327566
ENSG00000184992	BRI3BP	0.448139	0.00264011	0.0328109
ENSG00000111961	SASH1	0.591717	0.00264118	0.0328109
ENSG00000078177	N4BP2	0.576013	0.00264969	0.0328884
ENSG00000155115	GTF3C6	-0.572093	0.00265711	0.0329523
ENSG00000165672	PRDX3	0.453389	0.00266194	0.032984
ENSG00000221963	APOL6	0.503568	0.00267053	0.0330278
ENSG00000168096	ANKS3	-0.497014	0.00267106	0.0330278
ENSG00000166398	KIAA0355	0.538861	0.00267232	0.0330278
ENSG00000006607	FARP2	0.482271	0.002694	0.0332673
ENSG00000137710	RDX	0.501577	0.00269922	0.0333034
ENSG00000130382	MLLT1	-0.427473	0.00270436	0.0333385
ENSG00000140545	MFGE8	-0.409428	0.00270893	0.0333409
ENSG00000213079	SCAF8	0.490168	0.00270916	0.0333409
ENSG00000187987	ZSCAN23	0.816282	0.00271453	0.0333786
ENSG00000114346	ECT2	0.476062	0.00273214	0.0335479
ENSG00000166046	TCP11L2	0.726735	0.00273293	0.0335479
ENSG00000144655	CSRNP1	0.563304	0.00273978	0.0336028
ENSG00000197121	PGAP1	0.635583	0.00274205	0.0336028
ENSG00000206527	HACD2	0.468526	0.00275887	0.0337804
ENSG00000003096	KLHL13	0.68933	0.0027637	0.0337824
ENSG00000170759	KIF5B	0.47269	0.0027637	0.0337824
ENSG00000090975	PITPNM2	0.508509	0.00276747	0.0338
ENSG00000111817	DSE	0.480184	0.00277525	0.0338664
ENSG00000172893	DHCR7	0.436354	0.00278135	0.0339123
ENSG00000272661	RP4-548D19.3	-0.817064	0.00278606	0.0339278
ENSG00000164292	RHOBTB3	0.603555	0.0027873	0.0339278
ENSG00000177614	PGBD5	-0.579189	0.00279574	0.0340019
ENSG00000135763	URB2	0.479558	0.00281643	0.0342248
ENSG00000160285	LSS	0.431804	0.00282865	0.0343445
ENSG00000226328	NUP50-AS1	-0.534927	0.00284048	0.034452
ENSG00000135837	CEP350	0.533672	0.00284226	0.034452
ENSG00000167548	KMT2D	0.569106	0.00284703	0.0344599
ENSG00000163283	ALPP	-0.569867	0.00284767	0.0344599
ENSG00000100014	SPECC1L	-0.438026	0.00286792	0.0346759
ENSG00000163848	ZNF148	0.483164	0.0028834	0.0348258
ENSG00000101974	ATP11C	0.479048	0.00288653	0.0348258
ENSG00000115966	ATF2	0.460952	0.00288753	0.0348258
ENSG00000164307	ERAP1	0.538521	0.00290083	0.0349572
ENSG00000145391	SETD7	0.502754	0.00290498	0.0349649
ENSG00000113522	RAD50	0.590223	0.00290848	0.0349649
ENSG00000172476	RAB40A	-0.771568	0.00290871	0.0349649
ENSG00000134716	CYP2J2	0.813013	0.00292494	0.0351308
ENSG00000160766	GBAP1	-0.648209	0.00292885	0.0351487
ENSG00000104859	CLASRP	-0.452869	0.00293481	0.0351909
ENSG00000116649	SRM	-0.428107	0.00295383	0.0353774
ENSG00000072274	TFRC	0.462869	0.00295524	0.0353774
ENSG00000120159	CAAP1	0.488361	0.00296494	0.0354642
ENSG00000159840	ZYX	-0.404645	0.00298276	0.0356479
ENSG00000064687	ABCA7	-0.473203	0.00299535	0.0357688
ENSG00000253276	CCDC71L	-0.443579	0.00299892	0.035782
ENSG00000125148	MT2A	-0.470406	0.00300222	0.0357919
ENSG00000162636	FAM102B	0.582638	0.00301125	0.035852
ENSG00000104960	PTOV1	-0.43205	0.00301385	0.035852
ENSG00000198399	ITSN2	0.506924	0.00301469	0.035852
ENSG00000153531	ADPRHL1	-0.661532	0.00302106	0.0358983
ENSG00000170027	YWHAG	0.419853	0.00302566	0.0359179
ENSG00000163939	PBRM1	0.466766	0.00302767	0.0359179
ENSG00000056050	HPF1	-0.516375	0.00303186	0.0359382
ENSG00000143437	ARNT	0.455462	0.00306947	0.0363542
ENSG00000180263	FGD6	0.552505	0.00307374	0.0363581
ENSG00000145040	UCN2	-0.80118	0.00307481	0.0363581
ENSG00000174469	CNTNAP2	0.660063	0.00308408	NA
ENSG00000120306	CYSTM1	0.493457	0.00311681	0.0368063
ENSG00000186522	SEPT10	0.44733	0.0031178	0.0368063
ENSG00000144426	NBEAL1	0.789252	0.00312799	0.0368965
ENSG00000100393	EP300	0.571956	0.00313201	0.0368991
ENSG00000108061	SHOC2	0.47118	0.0031333	0.0368991
ENSG00000113916	BCL6	0.500202	0.00313825	0.0369274
ENSG00000081913	PHLPP1	0.459852	0.00314424	0.0369678
ENSG00000140199	SLC12A6	0.566273	0.00315376	0.0370217
ENSG00000113739	STC2	-0.411119	0.00315394	0.0370217
ENSG00000120802	TMPO	0.40338	0.00315858	0.0370462
ENSG00000177943	MAMDC4	-0.703979	0.00316268	0.0370643
ENSG00000085365	SCAMP1	0.451652	0.003169	0.0371083
ENSG00000273058	RP11-385F5.5	-0.748593	0.00317308	0.0371261
ENSG00000256618	MTRNR2L1	-0.475808	0.00317665	0.0371378
ENSG00000176055	MBLAC2	0.56986	0.00318384	0.0371708
ENSG00000096717	SIRT1	0.473782	0.0031846	0.0371708
ENSG00000188167	TMPPE	0.79646	0.00319015	0.0371995
ENSG00000154175	ABI3BP	0.711184	0.00319232	0.0371995
ENSG00000198887	SMC5	0.466506	0.00319634	0.0371995
ENSG00000198624	CCDC69	0.496829	0.00319734	0.0371995
ENSG00000145623	OSMR	0.51042	0.00320407	0.0372479
ENSG00000177548	RABEP2	-0.476799	0.00320985	0.0372852
ENSG00000136536	MARCH7	0.493207	0.00321523	0.0373129
ENSG00000075711	DLG1	0.476624	0.00321739	0.0373129
ENSG00000185238	PRMT3	0.454631	0.0032206	0.0373203
ENSG00000013588	GPRC5A	-0.393923	0.00323367	0.0374418
ENSG00000101199	ARFGAP1	-0.408857	0.00323698	0.0374502
ENSG00000092531	SNAP23	0.470601	0.0032501	0.037572
ENSG00000266412	NCOA4	0.472364	0.00326414	0.0376852
ENSG00000038210	PI4K2B	-0.572795	0.0032651	0.0376852
ENSG00000140983	RHOT2	-0.43135	0.00326988	0.0377104
ENSG00000112299	VNN1	-0.640139	0.00327564	0.0377466
ENSG00000013573	DDX11	-0.458733	0.00327823	0.0377466
ENSG00000116005	PCYOX1	0.464076	0.00328114	0.0377501
ENSG00000122512	PMS2	0.580574	0.00329019	0.037822
ENSG00000249641	HOXC13-AS	-0.568103	0.00329262	0.037822
ENSG00000198964	SGMS1	0.562843	0.00330518	0.03792
ENSG00000135686	KLHL36	0.46649	0.00330729	0.03792
ENSG00000169231	THBS3	-0.465317	0.003309	0.03792
ENSG00000171865	RNASEH1	0.470048	0.00331529	0.037962
ENSG00000179277	MEIS3P1	0.763958	0.00333422	0.0381486
ENSG00000267121	CTD-2020K17.1	-0.727321	0.00334155	0.0382023
ENSG00000164211	STARD4	0.453819	0.0033503	0.0382721
ENSG00000272325	NUDT3	-0.422396	0.00337526	0.0385269
ENSG00000106714	CNTNAP3	0.800618	0.00338825	0.0386447
ENSG00000215424	MCM3AP-AS1	0.755851	0.00339384	0.038678
ENSG00000198718	TOGARAM1	0.651117	0.00340768	0.0388052
ENSG00000189108	IL1RAPL2	0.728873	0.00341905	0.0388742
ENSG00000136378	ADAMTS7	-0.467587	0.0034191	0.0388742
ENSG00000129493	HEATR5A	0.545224	0.0034313	0.0389802
ENSG00000079931	MOXD1	0.731998	0.00343711	0.0389802
ENSG00000176105	YES1	0.450387	0.00343923	0.0389802
ENSG00000140939	NOL3	-0.482178	0.00344105	0.0389802
ENSG00000259366	CTD-2647L4.4	0.770648	0.00344188	0.0389802
ENSG00000165119	HNRNPK	0.393311	0.00344629	0.0389891
ENSG00000180096	SEPT1	-0.709206	0.00344805	0.0389891
ENSG00000233757	AC092835.2	0.799016	0.00345376	0.0390231
ENSG00000197912	SPG7	-0.395023	0.00347337	0.0392141
ENSG00000177225	PDDC1	-0.409882	0.00347721	0.0392269
ENSG00000104881	PPP1R13L	-0.417079	0.0034888	0.0393271
ENSG00000150636	CCDC102B	-0.661259	0.00350281	0.039411
ENSG00000160191	PDE9A	-0.797904	0.00350368	0.039411
ENSG00000090273	NUDC	-0.446549	0.00350441	0.039411
ENSG00000281398	SNHG4	0.587879	0.00351165	0.0394618
ENSG00000145246	ATP10D	0.572883	0.00351439	0.039462
ENSG00000162669	HFM1	-0.620685	0.00352216	NA
ENSG00000187193	MT1X	-0.545242	0.00352708	0.0395423
ENSG00000169251	NMD3	0.453331	0.00352926	0.0395423
ENSG00000169594	BNC1	0.499973	0.00352973	0.0395423
ENSG00000165097	KDM1B	0.562707	0.00353591	0.0395809
ENSG00000157637	SLC38A10	-0.401047	0.0035497	0.0397025
ENSG00000055332	EIF2AK2	0.457439	0.00355226	0.0397025
ENSG00000144224	UBXN4	0.461487	0.00355694	0.0397242
ENSG00000196705	ZNF431	0.493529	0.00357516	0.0398969
ENSG00000150627	WDR17	0.790294	0.00358272	0.0399505
ENSG00000125630	POLR1B	0.448834	0.00358833	0.0399569
ENSG00000163918	RFC4	-0.480222	0.00359562	0.0399569
ENSG00000138660	AP1AR	0.50291	0.00359769	0.0399569
ENSG00000112078	KCTD20	0.459301	0.00359857	0.0399569
ENSG00000013810	TACC3	-0.431556	0.00359972	0.0399569
ENSG00000253710	ALG11	0.701001	0.00359984	0.0399569
ENSG00000164197	RNF180	0.651746	0.0036122	0.0400633
ENSG00000198712	MT-CO2	-0.428915	0.00361573	0.0400718
ENSG00000113384	GOLPH3	0.435233	0.00362639	0.0401394
ENSG00000115904	SOS1	0.504106	0.00362738	0.0401394
ENSG00000169696	ASPSCR1	-0.511915	0.00363952	0.0402431
ENSG00000167653	PSCA	-0.441534	0.00365531	0.0403868
ENSG00000242125	SNHG3	-0.436227	0.00366184	0.0404279
ENSG00000133422	MORC2	-0.420541	0.00366461	0.0404279
ENSG00000087299	L2HGDH	0.533575	0.00367194	0.0404779
ENSG00000161395	PGAP3	-0.516126	0.00368307	0.0405459
ENSG00000184226	PCDH9	0.511908	0.0036837	0.0405459
ENSG00000234912	SNHG20	-0.658619	0.00369422	0.0406308
ENSG00000210100	MT-TI	-0.688718	0.00370054	0.0406695
ENSG00000130119	GNL3L	0.570501	0.00371509	0.0407984
ENSG00000117523	PRRC2C	0.508748	0.00373126	0.0409246
ENSG00000170365	SMAD1	0.613462	0.00373223	0.0409246
ENSG00000278571	MIR7161	0.662176	0.00373439	NA
ENSG00000178922	HYI	-0.533159	0.00373812	0.0409497
ENSG00000124275	MTRR	0.517777	0.00374243	0.0409497
ENSG00000119862	LGALSL	0.506606	0.00374498	0.0409497
ENSG00000182952	HMGN4	0.441884	0.00374583	0.0409497
ENSG00000108021	FAM208B	0.57432	0.00374974	0.0409616
ENSG00000162129	CLPB	0.443066	0.00375265	0.0409625
ENSG00000158062	UBXN11	-0.488129	0.00375967	0.0409983
ENSG00000004534	RBM6	-0.399386	0.0037616	0.0409983
ENSG00000187954	CYHR1	-0.400689	0.00377149	0.0410111
ENSG00000198363	ASPH	0.416696	0.00377175	0.0410111
ENSG00000075826	SEC31B	-0.547296	0.00377398	0.0410111
ENSG00000171004	HS6ST2	0.467085	0.00377409	0.0410111
ENSG00000100442	FKBP3	-0.485024	0.00378771	0.0411282
ENSG00000234409	CCDC188	-0.581395	0.00379083	0.0411312
ENSG00000166987	MBD6	-0.427133	0.00379623	0.041159
ENSG00000126215	XRCC3	-0.458073	0.00379918	0.0411601
ENSG00000169379	ARL13B	0.485159	0.00381009	0.0412475
ENSG00000163810	TGM4	0.790302	0.00382922	0.0414236
ENSG00000141027	NCOR1	0.480627	0.00385642	0.0416867
ENSG00000104856	RELB	-0.557416	0.00387341	0.0418392
ENSG00000145907	G3BP1	0.407337	0.00388204	0.0419011
ENSG00000107829	FBXW4	-0.431284	0.00388615	0.0419089
ENSG00000145012	LPP	0.472734	0.00389117	0.0419089
ENSG00000062650	WAPL	0.479323	0.00389144	0.0419089
ENSG00000109265	KIAA1211	0.782432	0.00392513	0.0422404
ENSG00000137166	FOXP4	-0.427068	0.00392857	0.0422418
ENSG00000071859	FAM50A	-0.46271	0.0039311	0.0422418
ENSG00000118495	PLAGL1	0.493438	0.00393985	0.0422556
ENSG00000196968	FUT11	0.503769	0.0039426	0.0422556
ENSG00000261542	RP11-16E18.3	-0.778916	0.00394375	0.0422556
ENSG00000174839	DENND6A	0.495313	0.00394405	0.0422556
ENSG00000221978	CCNL2	-0.399948	0.00394945	0.0422822
ENSG00000145332	KLHL8	0.493978	0.00395483	0.0422886
ENSG00000140992	PDPK1	0.543214	0.00395799	0.0422886
ENSG00000058091	CDK14	0.483815	0.00395881	0.0422886
ENSG00000065413	ANKRD44	0.720143	0.00398481	0.042535
ENSG00000159256	MORC3	0.53474	0.00399082	0.0425678
ENSG00000155561	NUP205	0.48814	0.00399647	0.0425966
ENSG00000260597	AC012531.25	0.78353	0.00401768	0.0427912
ENSG00000183741	CBX6	-0.406046	0.00402986	0.0428894
ENSG00000213066	FGFR1OP	-0.532541	0.00403573	0.0429204
ENSG00000133985	TTC9	0.628107	0.00404079	0.0429386
ENSG00000204519	ZNF551	0.56648	0.00404337	0.0429386
ENSG00000141522	ARHGDIA	-0.425854	0.0040528	0.0429812
ENSG00000185305	ARL15	0.595184	0.00405332	0.0429812
ENSG00000109686	SH3D19	0.463284	0.00405894	0.0430093
ENSG00000156467	UQCRB	-0.428268	0.00406727	0.0430364
ENSG00000169258	GPRIN1	-0.465021	0.00406743	0.0430364
ENSG00000198205	ZXDA	0.770933	0.00408732	0.0432152
ENSG00000179241	LDLRAD3	0.461654	0.00409246	0.043238
ENSG00000034677	RNF19A	0.478896	0.00409683	0.0432526
ENSG00000133639	BTG1	-0.406132	0.00410653	0.0432949
ENSG00000117222	RBBP5	0.439393	0.00410682	0.0432949
ENSG00000120162	MOB3B	0.597241	0.00412246	0.0433898
ENSG00000184349	EFNA5	-0.455636	0.00412811	0.0433898
ENSG00000135535	CD164	0.41112	0.00412909	0.0433898
ENSG00000186230	ZNF749	0.641817	0.00413015	0.0433898
ENSG00000114904	NEK4	0.480229	0.00413079	0.0433898
ENSG00000123908	AGO2	0.418198	0.00416554	0.0437231
ENSG00000171940	ZNF217	0.474902	0.00417311	0.0437708
ENSG00000182578	CSF1R	0.782717	0.00417996	0.0438109
ENSG00000178188	SH2B1	-0.405676	0.00419855	0.043974
ENSG00000156970	BUB1B	0.424377	0.00423259	0.0442693
ENSG00000104635	SLC39A14	0.433745	0.00423286	0.0442693
ENSG00000158805	ZNF276	-0.421408	0.00423727	0.0442834
ENSG00000023228	NDUFS1	0.419935	0.00424828	0.0443665
ENSG00000187672	ERC2	0.769353	0.00425142	0.0443673
ENSG00000166860	ZBTB39	0.55338	0.00426554	0.0444826
ENSG00000159459	UBR1	0.531674	0.00428481	0.0446514
ENSG00000075340	ADD2	-0.625644	0.00429304	NA
ENSG00000167258	CDK12	0.481923	0.00430134	0.044761
ENSG00000140450	ARRDC4	0.585612	0.0043015	0.044761
ENSG00000137968	SLC44A5	0.606609	0.00430716	0.0447876
ENSG00000185189	NRBP2	-0.437132	0.00433206	0.0450143
ENSG00000079257	LXN	0.476615	0.00434184	0.0450835
ENSG00000169871	TRIM56	-0.419336	0.00434495	0.0450835
ENSG00000178385	PLEKHM3	0.512471	0.00434915	0.0450948
ENSG00000161091	MFSD12	-0.426172	0.00435323	0.0451048
ENSG00000115392	FANCL	-0.528317	0.00435656	0.0451071
ENSG00000125534	PPDPF	-0.556465	0.00435975	0.0451078
ENSG00000135069	PSAT1	0.401028	0.00438793	0.045367
ENSG00000174780	SRP72	0.448796	0.00440567	0.0455159
ENSG00000091157	WDR7	0.518503	0.00440862	0.0455159
ENSG00000158467	AHCYL2	0.500405	0.00441688	0.0455687
ENSG00000188599	NPIPP1	-0.67342	0.00445951	0.0459758
ENSG00000185386	MAPK11	-0.496146	0.00446424	0.0459871
ENSG00000138802	SEC24B	0.479349	0.00446695	0.0459871
ENSG00000231131	LINC01468	0.530083	0.0044702	0.0459878
ENSG00000104885	DOT1L	-0.419577	0.00447833	0.0460313
ENSG00000129355	CDKN2D	-0.606011	0.00448078	0.0460313
ENSG00000181192	DHTKD1	0.43225	0.00451267	0.0463234
ENSG00000149948	HMGA2	-0.436861	0.00451836	0.0463234
ENSG00000141867	BRD4	-0.401069	0.00451881	0.0463234
ENSG00000224843	LINC00240	-0.767177	0.00453443	0.0464507
ENSG00000150630	VEGFC	-0.686812	0.00457024	0.0467844
ENSG00000135966	TGFBRAP1	0.473577	0.00457408	0.0467907
ENSG00000059728	MXD1	0.547264	0.00457951	0.046803
ENSG00000170325	PRDM10	0.483745	0.00458175	0.046803
ENSG00000176853	FAM91A1	0.43035	0.00459448	0.0469
ENSG00000272669	RP3-508I15.21	-0.753607	0.00460979	0.0469964
ENSG00000067167	TRAM1	0.464218	0.00461042	0.0469964
ENSG00000107099	DOCK8	0.508021	0.00461568	0.0470169
ENSG00000138439	FAM117B	0.612188	0.0046229	0.0470574
ENSG00000101246	ARFRP1	-0.447275	0.00462914	0.0470878
ENSG00000145715	RASA1	0.464918	0.00465124	0.0472795
ENSG00000102743	SLC25A15	0.584388	0.00465784	0.0473133
ENSG00000174446	SNAPC5	-0.549748	0.00466657	0.0473688
ENSG00000146281	PM20D2	0.438032	0.00467523	0.0474235
ENSG00000166747	AP1G1	0.441971	0.00468319	0.047471
ENSG00000271971	CTD-2006H14.2	-0.71904	0.00469791	0.0475578
ENSG00000174939	ASPHD1	-0.609717	0.00469832	0.0475578
ENSG00000182685	BRICD5	-0.697418	0.00471937	0.0477073
ENSG00000136938	ANP32B	-0.449299	0.00471968	0.0477073
ENSG00000079134	THOC1	-0.489691	0.00472545	0.0477323
ENSG00000205339	IPO7	0.435749	0.00473645	0.0478101
ENSG00000166147	FBN1	0.510417	0.00479614	0.0483788
ENSG00000101213	PTK6	-0.689707	0.00480052	0.0483894
ENSG00000198791	CNOT7	0.421632	0.00481615	0.0484884
ENSG00000135924	DNAJB2	-0.422585	0.00481704	0.0484884
ENSG00000168813	ZNF507	0.446226	0.00483339	0.0486193
ENSG00000243927	MRPS6	-0.476619	0.00485493	0.048802
ENSG00000080608	PUM3	-0.429723	0.00486259	0.0488451
ENSG00000106537	TSPAN13	0.454364	0.00487435	0.0489292
ENSG00000214076	CPSF1P1	0.768204	0.00489252	0.0490601
ENSG00000082269	FAM135A	0.65892	0.00489445	0.0490601
ENSG00000124222	STX16	-0.407644	0.00489754	0.0490601
ENSG00000138385	SSB	-0.441715	0.00491778	0.0492036
ENSG00000066777	ARFGEF1	0.476522	0.00491866	0.0492036
ENSG00000166575	TMEM135	0.513288	0.00493468	0.0493298
ENSG00000138592	USP8	0.466748	0.00494895	0.0494383
ENSG00000107159	CA9	-0.732041	0.00495826	0.0494817
ENSG00000072135	PTPN18	-0.412524	0.00496061	0.0494817
ENSG00000271781	CTD-2589H19.6	-0.766482	0.00496396	0.0494817
ENSG00000119986	AVPI1	0.443485	0.00496696	0.0494817
ENSG00000048028	USP28	0.466733	0.00497703	0.0495169
ENSG00000105877	DNAH11	0.548388	0.00497733	0.0495169
ENSG00000095203	EPB41L4B	0.533927	0.00498194	0.0495287
ENSG00000260563	RP13-516M14.1	-0.631496	0.00499482	0.0496228
ENSG00000183475	ASB7	0.463364	0.00499866	0.0496269
ENSG00000125850	OVOL2	0.766288	0.00501591	0.049764
ENSG00000262903	RP11-235E17.6	-0.729443	0.0050254	0.0498175
ENSG00000184574	LPAR5	0.655458	0.00503092	0.0498175
ENSG00000130396	AFDN	0.461054	0.00503162	0.0498175
ENSG00000189221	MAOA	0.458707	0.0050416	0.0498771
ENSG00000151690	MFSD6	0.460874	0.00504602	0.0498771
ENSG00000116711	PLA2G4A	0.567521	0.00504797	0.0498771
ENSG00000196378	ZNF34	-0.60678	0.00505283	0.0498911
ENSG00000168610	STAT3	0.434013	0.00506978	0.0500243
ENSG00000006468	ETV1	0.497398	0.00507501	0.0500419
ENSG00000122335	SERAC1	0.527234	0.00507955	0.0500526
ENSG00000157557	ETS2	0.446265	0.0051075	0.0502938
ENSG00000196110	ZNF699	0.731332	0.00511662	0.0503319
ENSG00000156642	NPTN	0.425206	0.0051204	0.0503319
ENSG00000163293	NIPAL1	0.541621	0.0051218	0.0503319
ENSG00000273749	CYFIP1	0.454587	0.00514421	0.0505179
ENSG00000242086	LINC00969	-0.511336	0.00514969	0.0505374
ENSG00000124383	MPHOSPH10	-0.473397	0.00515433	0.0505487
ENSG00000105321	CCDC9	-0.52567	0.0051625	0.0505946
ENSG00000179454	KLHL28	0.580583	0.0051673	0.0506074
ENSG00000103942	HOMER2	0.497651	0.00518999	0.0507952
ENSG00000163867	ZMYM6	-0.556358	0.0051986	0.0508452
ENSG00000162585	FAAP20	-0.504399	0.00520387	0.0508624
ENSG00000149541	B3GAT3	-0.454021	0.0052282	0.0510657
ENSG00000162073	PAQR4	-0.435896	0.00527872	0.0514311
ENSG00000090006	LTBP4	-0.399277	0.0052813	0.0514311
ENSG00000016391	CHDH	-0.761274	0.0052819	0.0514311
ENSG00000058453	CROCC	-0.522762	0.00528292	0.0514311
ENSG00000122591	FAM126A	0.447134	0.00528337	0.0514311
ENSG00000100281	HMGXB4	0.440234	0.00529093	0.0514702
ENSG00000143384	MCL1	0.365863	0.00530577	0.0515536
ENSG00000163191	S100A11	-0.418151	0.00530662	0.0515536
ENSG00000072062	PRKACA	-0.391986	0.00531454	0.0515959
ENSG00000076706	MCAM	-0.380378	0.00533456	0.0517556
ENSG00000188321	ZNF559	-0.537256	0.00534209	0.051794
ENSG00000164414	SLC35A1	-0.563109	0.00535075	0.0518385
ENSG00000162520	SYNC	0.609074	0.00535384	0.0518385
ENSG00000163635	ATXN7	0.487841	0.00538558	0.052111
ENSG00000258365	RP11-1105G2.3	-0.750222	0.00541352	0.0522831
ENSG00000152223	EPG5	0.512528	0.00541419	0.0522831
ENSG00000039650	PNKP	-0.433373	0.0054142	0.0522831
ENSG00000156858	PRR14	-0.431127	0.00542358	0.0523388
ENSG00000198346	ZNF813	0.730264	0.00543939	0.0524564
ENSG00000243650	RN7SL834P	0.699447	0.00545989	0.0526003
ENSG00000105011	ASF1B	-0.433496	0.00546157	0.0526003
ENSG00000006576	PHTF2	0.459437	0.00548652	0.0528054
ENSG00000138623	SEMA7A	0.637548	0.00550047	0.0529046
ENSG00000186566	GPATCH8	0.453118	0.00551392	0.0529988
ENSG00000069702	TGFBR3	0.502253	0.00553595	0.0531752
ENSG00000185127	C6orf120	0.461874	0.00554293	0.053207
ENSG00000163156	SCNM1	-0.467528	0.0055499	0.0532386
ENSG00000205593	DENND6B	-0.646193	0.00555794	0.0532804
ENSG00000082805	ERC1	0.465041	0.00557203	0.0533214
ENSG00000136319	TTC5	0.468126	0.00557322	0.0533214
ENSG00000152284	TCF7L1	-0.589616	0.00557326	0.0533214
ENSG00000182504	CEP97	0.505446	0.00558953	0.0534418
ENSG00000082212	ME2	0.400383	0.00559672	0.0534752
ENSG00000169570	DTWD2	0.622281	0.00561781	0.0536127
ENSG00000204406	MBD5	0.471818	0.0056185	0.0536127
ENSG00000043143	JADE2	0.398047	0.00562284	0.0536187
ENSG00000152939	MARVELD2	0.569824	0.00563575	0.0537065
ENSG00000164603	BMT2	0.479639	0.00564579	0.0537354
ENSG00000182087	TMEM259	-0.397915	0.00564621	0.0537354
ENSG00000129315	CCNT1	0.420412	0.00566146	0.0538452
ENSG00000150457	LATS2	0.481879	0.0056744	0.0539329
ENSG00000107863	ARHGAP21	0.504795	0.00570577	0.0541851
ENSG00000169710	FASN	0.398834	0.00570842	0.0541851
ENSG00000012174	MBTPS2	0.483214	0.00571673	0.0542106
ENSG00000075539	FRYL	0.474856	0.00572016	0.0542106
ENSG00000112144	ICK	0.529664	0.00572523	0.0542106
ENSG00000166828	SCNN1G	0.389147	0.00572608	0.0542106
ENSG00000231925	TAPBP	-0.384465	0.00578407	0.0547239
ENSG00000127616	SMARCA4	-0.370991	0.00579269	0.0547695
ENSG00000064961	HMG20B	-0.42662	0.00579646	0.0547695
ENSG00000154134	ROBO3	-0.409981	0.0058062	0.0548258
ENSG00000143793	C1orf35	-0.475552	0.00581855	0.0549067
ENSG00000203485	INF2	-0.368191	0.00582596	0.0549408
ENSG00000124782	RREB1	0.454629	0.00583274	0.0549689
ENSG00000182621	PLCB1	0.746808	0.00583993	0.0550009
ENSG00000164244	PRRC1	0.415396	0.00584794	0.0550405
ENSG00000132256	TRIM5	0.46879	0.00585902	0.0551091
ENSG00000211456	SACM1L	0.450494	0.0058764	0.0552037
ENSG00000197860	SGTB	0.465539	0.0058779	0.0552037
ENSG00000223546	LINC00630	0.737362	0.00588052	0.0552037
ENSG00000130529	TRPM4	-0.434268	0.00588462	0.0552064
ENSG00000121851	POLR3GL	-0.489547	0.00590067	0.0553212
ENSG00000173812	EIF1	-0.383147	0.00591671	0.0554357
ENSG00000174529	TMEM81	-0.61015	0.00593941	0.0556124
ENSG00000061938	TNK2	-0.385875	0.00594837	0.0556603
ENSG00000185684	EP400NL	-0.48956	0.00595359	0.0556732
ENSG00000253729	PRKDC	0.451885	0.00596079	0.0556961
ENSG00000110321	EIF4G2	0.412097	0.00596373	0.0556961
ENSG00000116017	ARID3A	-0.496039	0.00596809	0.0557009
ENSG00000127564	PKMYT1	-0.486932	0.0059775	0.055752
ENSG00000232022	FAAHP1	0.746452	0.00598126	0.055752
ENSG00000164715	LMTK2	0.443503	0.00599412	0.0558359
ENSG00000025293	PHF20	0.415383	0.00599975	0.0558524
ENSG00000155189	AGPAT5	0.458136	0.00600457	0.0558614
ENSG00000107897	ACBD5	0.460434	0.00601099	0.0558745
ENSG00000108107	RPL28	-0.445024	0.00601381	0.0558745
ENSG00000100625	SIX4	0.514679	0.00601755	0.0558745
ENSG00000162613	FUBP1	0.39055	0.00605479	0.0561739
ENSG00000197157	SND1	-0.374087	0.00605756	0.0561739
ENSG00000007968	E2F2	-0.522327	0.00606614	0.0561892
ENSG00000107164	FUBP3	0.425248	0.00606696	0.0561892
ENSG00000173706	HEG1	0.494478	0.00609346	0.0563986
ENSG00000170962	PDGFD	0.723691	0.00610131	0.0564352
ENSG00000175938	ORAI3	-0.530919	0.00611073	0.0564863
ENSG00000100580	TMED8	0.450525	0.00612669	0.0565977
ENSG00000180626	ZNF594	0.600279	0.00615538	NA
ENSG00000065154	OAT	0.396329	0.00616486	0.0569139
ENSG00000186377	CYP4X1	0.665621	0.00617164	0.0569402
ENSG00000204227	RING1	-0.421879	0.00618204	0.0569954
ENSG00000130726	TRIM28	-0.37131	0.00618573	0.0569954
ENSG00000168564	CDKN2AIP	0.532183	0.00618942	0.0569954
ENSG00000188807	TMEM201	-0.424473	0.00622481	0.0572849
ENSG00000155962	CLIC2	0.737965	0.00625336	0.057503
ENSG00000138138	ATAD1	0.412058	0.00625646	0.057503
ENSG00000174827	PDZK1	0.658877	0.00626846	NA
ENSG00000090530	P3H2	0.510218	0.00627006	0.0575915
ENSG00000149929	HIRIP3	-0.485884	0.00629524	0.0577862
ENSG00000082258	CCNT2	0.436538	0.00631468	0.0579279
ENSG00000181619	GPR135	0.638535	0.00633197	0.0580006
ENSG00000186493	C5orf38	-0.539952	0.00633514	0.0580006
ENSG00000011198	ABHD5	0.457864	0.00633727	0.0580006
ENSG00000137040	RANBP6	0.468682	0.00633862	0.0580006
ENSG00000272040	CTC-366B18.4	-0.745325	0.00637768	0.0583211
ENSG00000137266	SLC22A23	0.631212	0.00639557	0.0584159
ENSG00000144369	FAM171B	0.583944	0.0063961	0.0584159
ENSG00000164830	OXR1	0.495748	0.00640906	0.0584973
ENSG00000272084	RP5-1126H10.2	-0.741875	0.00644414	0.0587518
ENSG00000204272	NBDY	-0.443472	0.00644506	0.0587518
ENSG00000113083	LOX	0.427268	0.006454	0.0587964
ENSG00000166401	SERPINB8	0.432277	0.00646441	0.0588542
ENSG00000162614	NEXN	-0.467265	0.00648841	0.0590356
ENSG00000089682	RBM41	0.513717	0.00652127	0.0592476
ENSG00000174840	PDE12	0.417685	0.00652312	0.0592476
ENSG00000261061	RP11-303E16.2	-0.600779	0.00652656	0.0592476
ENSG00000102763	VWA8	0.443048	0.00652807	0.0592476
ENSG00000119650	IFT43	-0.477534	0.00653684	0.05929
ENSG00000178917	ZNF852	0.719468	0.00655736	0.0594367
ENSG00000180182	MED14	0.464383	0.00656122	0.0594367
ENSG00000147065	MSN	0.384376	0.00658608	0.0596246
ENSG00000139722	VPS37B	-0.451388	0.00660977	0.0598017
ENSG00000091129	NRCAM	0.480257	0.00661809	0.0598396
ENSG00000099917	MED15	-0.368765	0.00664912	0.0600505
ENSG00000113430	IRX4	-0.466156	0.0066497	0.0600505
ENSG00000054267	ARID4B	0.426293	0.00666391	0.0601241
ENSG00000133739	LRRCC1	-0.517213	0.00666615	0.0601241
ENSG00000153443	UBALD1	-0.465081	0.00668135	0.0601889
ENSG00000101447	FAM83D	0.393044	0.00668165	0.0601889
ENSG00000095066	HOOK2	-0.461968	0.00668728	0.0601927
ENSG00000100307	CBX7	-0.48432	0.00669039	0.0601927
ENSG00000170791	CHCHD7	-0.400659	0.00669508	0.0601976
ENSG00000164117	FBXO8	0.510677	0.00670691	0.0602665
ENSG00000114573	ATP6V1A	0.453181	0.0067171	0.0603206
ENSG00000131626	PPFIA1	0.439475	0.00673002	0.0603992
ENSG00000166450	PRTG	0.573235	0.00674843	0.060527
ENSG00000003249	DBNDD1	-0.458709	0.00678402	0.0608085
ENSG00000259953	RP11-4O1.2	-0.737852	0.00680127	0.0609159
ENSG00000048707	VPS13D	0.460237	0.00680441	0.0609159
ENSG00000109738	GLRB	0.523856	0.00681512	0.0609741
ENSG00000060237	WNK1	0.451751	0.00683282	0.0610947
ENSG00000135953	MFSD9	0.526904	0.00686227	0.0612257
ENSG00000047365	ARAP2	0.507584	0.00686354	0.0612257
ENSG00000173597	SULT1B1	0.734387	0.00686359	0.0612257
ENSG00000145817	YIPF5	0.395824	0.00686438	0.0612257
ENSG00000273226	RP11-513M16.8	-0.737143	0.0068916	0.0614306
ENSG00000165983	PTER	0.456032	0.00690231	0.0614665
ENSG00000175482	POLD4	-0.56125	0.00690411	0.0614665
ENSG00000169855	ROBO1	0.481538	0.00693794	0.0616856
ENSG00000103657	HERC1	0.456685	0.00694133	0.0616856
ENSG00000152229	PSTPIP2	0.482332	0.00694149	0.0616856
ENSG00000250067	YJEFN3	-0.636986	0.0069587	0.0618006
ENSG00000196850	PPTC7	0.377391	0.00697425	0.0619003
ENSG00000139350	NEDD1	0.441749	0.00697848	0.0619003
ENSG00000025708	TYMP	-0.599628	0.00698846	0.0619509
ENSG00000124120	TTPAL	0.410765	0.00699936	0.0619522
ENSG00000076928	ARHGEF1	-0.377221	0.00699968	0.0619522
ENSG00000125971	DYNLRB1	-0.43953	0.00700143	0.0619522
ENSG00000187097	ENTPD5	0.467092	0.00704544	0.0623035
ENSG00000137343	ATAT1	-0.565053	0.00705752	0.0623723
ENSG00000135299	ANKRD6	0.679439	0.00708658	0.062574
ENSG00000091986	CCDC80	0.388279	0.00708899	0.062574
ENSG00000049167	ERCC8	0.500874	0.00710475	0.0626749
ENSG00000063245	EPN1	-0.426735	0.00715391	0.0630702
ENSG00000007541	PIGQ	-0.442695	0.00717037	0.0631449
ENSG00000153822	KCNJ16	0.734372	0.0071711	0.0631449
ENSG00000132024	CC2D1A	-0.390188	0.00720462	0.0633905
ENSG00000198858	R3HDM4	-0.413074	0.00720908	0.0633905
ENSG00000010278	CD9	0.391109	0.00721212	0.0633905
ENSG00000168818	STX18	-0.443791	0.0072242	0.0634582
ENSG00000187583	PLEKHN1	-0.526414	0.00724996	0.0636167
ENSG00000176994	SMCR8	0.448393	0.00725103	0.0636167
ENSG00000171100	MTM1	0.485801	0.00727	0.0637161
ENSG00000102109	PCSK1N	0.73071	0.00727116	0.0637161
ENSG00000123191	ATP7B	0.490791	0.00729304	0.0638514
ENSG00000072803	FBXW11	0.418699	0.00729541	0.0638514
ENSG00000100311	PDGFB	0.712319	0.00731857	0.0640154
ENSG00000173992	CCS	-0.439479	0.0073234	0.064019
ENSG00000169994	MYO7B	-0.427029	0.00733306	0.0640444
ENSG00000204305	AGER	-0.608425	0.00733515	0.0640444
ENSG00000122068	FYTTD1	0.428435	0.00734814	0.0640843
ENSG00000136051	WASHC4	0.454874	0.00734857	0.0640843
ENSG00000166833	NAV2	0.420458	0.00735492	0.0641011
ENSG00000163536	SERPINI1	0.558958	0.00737299	0.0642199
ENSG00000087253	LPCAT2	0.493934	0.00739371	0.0643617
ENSG00000203879	GDI1	-0.363638	0.00740027	0.0643801
ENSG00000135750	KCNK1	0.405591	0.00741736	0.064463
ENSG00000070882	OSBPL3	0.415335	0.0074187	0.064463
ENSG00000169683	LRRC45	-0.475044	0.00742823	0.0644691
ENSG00000116285	ERRFI1	0.448686	0.0074283	0.0644691
ENSG00000105559	PLEKHA4	-0.493599	0.00744826	0.0646036
ENSG00000261115	TMEM178B	0.730865	0.00748568	0.0648893
ENSG00000266402	SNHG25	-0.689379	0.00749228	0.0649077
ENSG00000141258	SGSM2	-0.395923	0.00751267	0.0650454
ENSG00000172936	MYD88	0.440359	0.00752301	0.065096
ENSG00000149499	EML3	-0.386952	0.00754867	0.0652711
ENSG00000158106	RHPN1	-0.520577	0.00755225	0.0652711
ENSG00000272993	RP11-196G18.24	-0.720828	0.00756949	0.0653811
ENSG00000169764	UGP2	-0.361621	0.0075826	0.0654179
ENSG00000164099	PRSS12	0.484302	0.00759095	0.0654179
ENSG00000123836	PFKFB2	0.526928	0.00759395	0.0654179
ENSG00000136630	HLX	-0.606187	0.00759579	0.0654179
ENSG00000102158	MAGT1	0.408696	0.00760214	0.0654179
ENSG00000165476	REEP3	0.379021	0.0076045	0.0654179
ENSG00000064012	CASP8	0.447904	0.00761529	0.0654179
ENSG00000137310	TCF19	-0.382254	0.0076171	0.0654179
ENSG00000251169	LINC01843	0.692434	0.00762001	0.0654179
ENSG00000146243	IRAK1BP1	0.522027	0.00762437	0.0654179
ENSG00000246695	RASSF8-AS1	-0.478528	0.00763147	0.0654179
ENSG00000134815	DHX34	-0.409731	0.00763218	0.0654179
ENSG00000281649	EBLN3P	0.416211	0.00763246	0.0654179
ENSG00000177169	ULK1	-0.383656	0.00764217	0.0654624
ENSG00000128872	TMOD2	0.445187	0.00765397	0.0655247
ENSG00000259429	UBE2Q2P2	0.724016	0.00766005	0.065538
ENSG00000164896	FASTK	-0.401847	0.00768023	0.0656638
ENSG00000102241	HTATSF1	-0.400741	0.00768382	0.0656638
ENSG00000178927	C17orf62	-0.388678	0.0076972	0.0657393
ENSG00000257621	PSMA3-AS1	-0.411709	0.00771407	0.0658446
ENSG00000179295	PTPN11	0.435121	0.00774247	0.0660481
ENSG00000108469	RECQL5	-0.420617	0.00775705	0.0661336
ENSG00000165030	NFIL3	-0.381796	0.00777072	0.0662111
ENSG00000272668	RP11-190A12.8	-0.69885	0.00777847	0.0662382
ENSG00000118046	STK11	-0.400085	0.00783727	0.0666997
ENSG00000182263	FIGN	0.50202	0.00784869	0.0667577
ENSG00000085449	WDFY1	0.439878	0.00785493	0.0667715
ENSG00000161813	LARP4	0.421462	0.00787138	0.0668721
ENSG00000197147	LRRC8B	0.655198	0.00787742	0.0668842
ENSG00000115825	PRKD3	0.431442	0.00791944	0.0672016
ENSG00000179021	C3orf38	0.449841	0.00792779	0.067233
ENSG00000161955	TNFSF13	0.725013	0.00793895	0.0672883
ENSG00000071655	MBD3	-0.428239	0.00794401	0.0672918
ENSG00000062725	APPBP2	0.448814	0.00795203	0.0673203
ENSG00000111358	GTF2H3	0.390469	0.00797331	0.0674222
ENSG00000186395	KRT10	-0.486704	0.00797581	0.0674222
ENSG00000173905	GOLIM4	0.434766	0.00797802	0.0674222
ENSG00000116138	DNAJC16	0.44094	0.00801521	0.0676638
ENSG00000170558	CDH2	0.391385	0.00801596	0.0676638
ENSG00000026297	RNASET2	-0.481797	0.00802311	0.067678
ENSG00000143498	TAF1A	0.47063	0.00803108	0.067678
ENSG00000162572	SCNN1D	-0.696495	0.00803165	0.067678
ENSG00000163960	UBXN7	0.431245	0.00803855	0.0676967
ENSG00000073169	SELENOO	-0.443267	0.00805409	0.0677757
ENSG00000204618	RNF39	0.705283	0.00806112	0.0677757
ENSG00000188613	NANOS1	-0.545661	0.00806197	0.0677757
ENSG00000114541	FRMD4B	0.681098	0.00806965	0.0677995
ENSG00000126860	EVI2A	-0.709724	0.00807585	0.0677995
ENSG00000130299	GTPBP3	-0.434899	0.00807884	0.0677995
ENSG00000271533	RP3-368A4.6	0.698403	0.00810744	0.0680002
ENSG00000121281	ADCY7	0.440681	0.00811214	0.0680002
ENSG00000143554	SLC27A3	-0.506399	0.00812793	0.0680932
ENSG00000162032	SPSB3	-0.424871	0.00814685	0.0682122
ENSG00000116871	MAP7D1	-0.395951	0.00815823	0.068268
ENSG00000224066	RP4-622L5.7	-0.713883	0.00818764	0.0684746
ENSG00000118242	MREG	0.528267	0.00821009	0.0686227
ENSG00000185973	TMLHE	0.486881	0.00822279	0.0686892
ENSG00000228630	HOTAIR	-0.573285	0.0082351	0.0687524
ENSG00000231064	RP11-263K19.4	-0.584329	0.00827213	0.0690218
ENSG00000131018	SYNE1	0.479793	0.00831146	0.0692982
ENSG00000170522	ELOVL6	0.37177	0.00831863	0.0692982
ENSG00000175066	GK5	0.450899	0.00831997	0.0692982
ENSG00000092140	G2E3	0.449394	0.00832439	0.0692982
ENSG00000158985	CDC42SE2	0.373345	0.00834149	0.0693796
ENSG00000082701	GSK3B	0.38108	0.00834625	0.0693796
ENSG00000167674	CTB-50L17.10	-0.406143	0.00834854	0.0693796
ENSG00000198018	ENTPD7	0.572086	0.00836235	0.0694545
ENSG00000012171	SEMA3B	-0.419247	0.00840356	0.0697568
ENSG00000275632	RP5-967N21.11	-0.713412	0.00842971	0.0699227
ENSG00000153339	TRAPPC8	0.49806	0.0084332	0.0699227
ENSG00000198157	HMGN5	-0.543153	0.00848219	0.0702887
ENSG00000165185	KIAA1958	0.511696	0.00849288	0.0703256
ENSG00000173209	AHSA2	-0.394215	0.00849636	0.0703256
ENSG00000108515	ENO3	-0.618935	0.00856571	0.0708591
ENSG00000271895	RP4-635E18.8	-0.690669	0.00857538	0.0708986
ENSG00000163697	APBB2	0.397817	0.00860919	0.0711376
ENSG00000280239	CTB-50L17.8	-0.669594	0.00863061	0.0712738
ENSG00000223959	AFG3L1P	-0.419771	0.00864722	0.0713375
ENSG00000137812	KNL1	0.457087	0.00864817	0.0713375
ENSG00000117407	ARTN	-0.696357	0.0086754	0.0715088
ENSG00000260910	LINC00565	-0.652409	0.0086788	0.0715088
ENSG00000115355	CCDC88A	0.445617	0.0087032	0.0716312
ENSG00000160305	DIP2A	0.408824	0.00870355	0.0716312
ENSG00000124831	LRRFIP1	0.385814	0.00871692	0.0716767
ENSG00000272821	CTA-384D8.36	-0.652744	0.00871898	0.0716767
ENSG00000198093	ZNF649	0.66587	0.0087549	0.0718944
ENSG00000235109	ZSCAN31	0.618402	0.00875538	0.0718944
ENSG00000186298	PPP1CC	0.354871	0.00876105	0.0719002
ENSG00000139631	CSAD	-0.492529	0.00876782	0.071915
ENSG00000164091	WDR82	0.392513	0.00880207	0.072155
ENSG00000139144	PIK3C2G	0.535065	0.00881732	NA
ENSG00000038219	BOD1L1	0.435671	0.00881821	0.0722465
ENSG00000172932	ANKRD13D	-0.388012	0.00883613	0.0723343
ENSG00000123146	ADGRE5	-0.362925	0.00883892	0.0723343
ENSG00000050405	LIMA1	0.401472	0.00884426	0.0723371
ENSG00000070081	NUCB2	-0.402185	0.00886004	0.0724253
ENSG00000165591	FAAH2	0.670478	0.008889	0.0725952
ENSG00000178999	AURKB	-0.422608	0.00889084	0.0725952
ENSG00000102699	PARP4	0.457111	0.00889886	0.0726006
ENSG00000177542	SLC25A22	-0.412267	0.00890153	0.0726006
ENSG00000131196	NFATC1	-0.534319	0.00892282	0.0727333
ENSG00000140526	ABHD2	0.437203	0.00894483	0.0728717
ENSG00000104731	KLHDC4	-0.36904	0.0089888	0.0731888
ENSG00000242498	ARPIN	0.430768	0.00900835	0.0732385
ENSG00000168447	SCNN1B	-0.414326	0.00900862	0.0732385
ENSG00000273466	RP11-548H3.1	-0.661376	0.00901008	0.0732385
ENSG00000154146	NRGN	-0.571437	0.00901538	0.0732405
ENSG00000113441	LNPEP	0.425555	0.00904761	0.0734611
ENSG00000169756	LIMS1	0.423544	0.0090638	0.0735514
ENSG00000082153	BZW1	0.388399	0.00908768	0.0737038
ENSG00000100258	LMF2	-0.378299	0.00910869	0.0737799
ENSG00000077463	SIRT6	-0.447031	0.00910914	0.0737799
ENSG00000196118	CCDC189	-0.594838	0.00911234	0.0737799
ENSG00000060749	QSER1	0.44257	0.00915232	0.0739449
ENSG00000185650	ZFP36L1	0.365867	0.00915243	0.0739449
ENSG00000184381	PLA2G6	-0.493233	0.00915244	0.0739449
ENSG00000162426	SLC45A1	-0.593752	0.00915314	0.0739449
ENSG00000151623	NR3C2	0.69706	0.00916941	0.074035
ENSG00000127022	CANX	0.378956	0.00918248	0.0740993
ENSG00000138821	SLC39A8	0.416185	0.0091947	0.0741566
ENSG00000169018	FEM1B	0.391927	0.00920481	0.0741686
ENSG00000023909	GCLM	0.378817	0.00920643	0.0741686
ENSG00000119125	GDA	0.464508	0.00921734	0.0742152
ENSG00000215375	MYL5	-0.532276	0.00922642	0.0742236
ENSG00000149716	ORAOV1	-0.432112	0.00922862	0.0742236
ENSG00000187098	MITF	0.476399	0.00924113	0.0742829
ENSG00000100429	HDAC10	-0.629891	0.00925792	0.074369
ENSG00000105137	SYDE1	-0.383285	0.00926605	0.074369
ENSG00000198393	ZNF26	-0.450821	0.00927217	0.074369
ENSG00000132963	POMP	-0.427083	0.00927238	0.074369
ENSG00000030582	GRN	-0.348184	0.00930129	0.0745074
ENSG00000073711	PPP2R3A	0.448803	0.00930462	0.0745074
ENSG00000138668	HNRNPD	-0.389347	0.00930506	0.0745074
ENSG00000262877	RP11-1055B8.4	-0.674484	0.00931261	0.0745266
ENSG00000092199	HNRNPC	0.34563	0.00932475	0.0745826
ENSG00000114054	PCCB	0.377982	0.00933551	0.0746274
ENSG00000116830	TTF2	0.425466	0.00934426	0.0746515
ENSG00000158636	EMSY	0.484714	0.00934883	0.0746515
ENSG00000101871	MID1	0.461101	0.00936239	0.0747186
ENSG00000131374	TBC1D5	0.414235	0.00937339	0.0747652
ENSG00000159082	SYNJ1	0.538646	0.00940671	0.0749896
ENSG00000111412	C12orf49	0.409692	0.00943284	0.0750887
ENSG00000187720	THSD4	0.44464	0.00943286	0.0750887
ENSG00000179262	RAD23A	-0.368776	0.00943469	0.0750887
ENSG00000164850	GPER1	-0.571085	0.00944654	0.0751417
ENSG00000169398	PTK2	0.391879	0.00945504	0.0751681
ENSG00000283511	RP11-456N14.6	-0.522113	0.00946685	0.0752207
ENSG00000125618	PAX8	-0.707878	0.00948186	0.0752735
ENSG00000120708	TGFBI	0.338242	0.00948389	0.0752735
ENSG00000155313	USP25	0.396878	0.00949255	0.0753009
ENSG00000204536	CCHCR1	-0.420675	0.00951266	0.0754192
ENSG00000117593	DARS2	0.371904	0.00952456	0.0754723
ENSG00000164597	COG5	0.469488	0.009546	0.0756007
ENSG00000143669	LYST	0.521193	0.0096007	0.0759924
ENSG00000233016	SNHG7	-0.447165	0.00960974	0.0760224
ENSG00000144730	IL17RD	0.537686	0.00962231	0.0760479
ENSG00000274012	RN7SL2	0.572891	0.00962346	0.0760479
ENSG00000141401	IMPA2	-0.377789	0.00963527	0.0760997
ENSG00000105974	CAV1	0.338688	0.00966656	0.0763052
ENSG00000165152	TMEM246	0.440065	0.00968395	0.0763612
ENSG00000225361	PPP1R26-AS1	-0.680535	0.0096842	0.0763612
ENSG00000146842	TMEM209	0.436831	0.00969076	0.0763714
ENSG00000197594	ENPP1	0.479518	0.00970245	0.0764219
ENSG00000163661	PTX3	-0.611982	0.00972196	0.076534
ENSG00000021574	SPAST	0.47044	0.00974255	0.0766544
ENSG00000134686	PHC2	-0.346981	0.00976861	0.0768178
ENSG00000226380	AC058791.1	-0.639666	0.00977445	0.076822
ENSG00000072071	ADGRL1	-0.456505	0.00981143	0.0770708
ENSG00000169718	DUS1L	-0.39811	0.00982467	0.077133
ENSG00000204991	SPIRE2	-0.523498	0.00988823	0.0775899
ENSG00000197114	ZGPAT	-0.562815	0.00990996	0.0777183
ENSG00000163820	FYCO1	0.423576	0.00992566	0.0777993
ENSG00000114698	PLSCR4	0.552548	0.00995185	0.0779624
ENSG00000166275	BORCS7	-0.514902	0.00997663	0.0780748
ENSG00000148841	ITPRIP	0.385861	0.00997697	0.0780748
ENSG00000110841	PPFIBP1	0.450787	0.00998808	0.0781195
ENSG00000105767	CADM4	-0.488985	0.00999986	0.0781694
ENSG00000076108	BAZ2A	0.438902	0.0100279	0.0783097
ENSG00000228002	DHX9P1	0.703448	0.0100286	0.0783097
ENSG00000185482	STAC3	-0.698823	0.0100678	0.0785548
ENSG00000131941	RHPN2	0.488427	0.0100709	0.0785548
ENSG00000274561	RP11-147L13.12	-0.695142	0.0100844	0.0786182
ENSG00000176018	LYSMD3	0.452618	0.0101768	0.0792555
ENSG00000267249	RP11-973H7.3	-0.696963	0.0101771	0.0792555
ENSG00000130827	PLXNA3	-0.386863	0.0102014	0.0794005
ENSG00000134313	KIDINS220	0.451216	0.0102067	0.0794005
ENSG00000280798	LINC00294	-0.423972	0.0102158	0.0794291
ENSG00000267575	CTC-459F4.3	0.538427	0.0102236	0.0794308
ENSG00000131558	EXOC4	0.364709	0.010227	0.0794308
ENSG00000163291	PAQR3	0.471027	0.0102543	0.0795942
ENSG00000189410	SH2D5	-0.549314	0.0102591	0.0795942
ENSG00000171055	FEZ2	-0.37957	0.0102841	0.0797461
ENSG00000164828	SUN1	0.422255	0.0102993	0.0797913
ENSG00000164209	SLC25A46	0.396329	0.010301	0.0797913
ENSG00000038382	TRIO	0.455776	0.0103203	0.0798982
ENSG00000257122	RRN3P3	-0.627377	0.0103408	0.0800145
ENSG00000153774	CFDP1	-0.427848	0.0103702	0.0801988
ENSG00000169155	ZBTB43	0.483679	0.0104076	0.0804276
ENSG00000281026	N4BP2L2-IT2	-0.60689	0.0104109	0.0804276
ENSG00000218891	ZNF579	-0.575137	0.010472	0.0808564
ENSG00000168918	INPP5D	0.4702	0.0104866	0.0809258
ENSG00000179195	ZNF664	0.400137	0.0105093	0.0810585
ENSG00000003393	ALS2	0.414125	0.0105281	0.0811598
ENSG00000115935	WIPF1	0.417249	0.0105354	0.0811729
ENSG00000105643	ARRDC2	-0.405586	0.0105441	0.081197
ENSG00000143324	XPR1	0.426076	0.0105615	0.0812879
ENSG00000184209	SNRNP35	-0.438396	0.0105878	0.0814333
ENSG00000181904	C5orf24	0.411932	0.0105917	0.0814333
ENSG00000182606	TRAK1	0.375965	0.0106075	0.0815016
ENSG00000270100	RP11-130L8.1	-0.642416	0.0106118	0.0815016
ENSG00000129194	SOX15	0.689655	0.0106452	0.0817147
ENSG00000184678	HIST2H2BE	-0.523031	0.0106577	0.0817677
ENSG00000198420	TCAF1	0.460553	0.0106665	0.0817919
ENSG00000269858	EGLN2	-0.474477	0.0106849	0.0818892
ENSG00000039319	ZFYVE16	0.421148	0.0106985	0.0819492
ENSG00000134243	SORT1	0.379539	0.010704	0.0819492
ENSG00000176261	ZBTB8OS	-0.418252	0.01077	0.0823694
ENSG00000106261	ZKSCAN1	0.422528	0.0107703	0.0823694
ENSG00000141458	NPC1	0.419762	0.0107856	0.082443
ENSG00000132953	XPO4	0.41061	0.0108295	0.0827348
ENSG00000196295	AC005154.6	-0.42818	0.010849	0.0828399
ENSG00000209082	MT-TL1	-0.606794	0.0108838	0.0830435
ENSG00000171451	DSEL	0.459061	0.0108886	0.0830435
ENSG00000137221	TJAP1	-0.358806	0.0108928	0.0830435
ENSG00000079482	OPHN1	0.59404	0.0109275	0.0832644
ENSG00000154380	ENAH	0.362774	0.0109407	0.0833171
ENSG00000172985	SH3RF3	-0.354499	0.010946	0.0833171
ENSG00000173402	DAG1	0.358722	0.0109618	0.0833882
ENSG00000136280	CCM2	-0.358972	0.0109668	0.0833882
ENSG00000110651	CD81	-0.342237	0.0109862	0.0834869
ENSG00000144566	RAB5A	0.36118	0.0109913	0.0834869
ENSG00000185567	AHNAK2	0.386781	0.0110103	0.0835867
ENSG00000197816	CCDC180	-0.627944	0.0110223	0.0836244
ENSG00000128283	CDC42EP1	-0.377271	0.0110268	0.0836244
ENSG00000065615	CYB5R4	0.461732	0.0110365	0.0836312
ENSG00000005249	PRKAR2B	0.65148	0.0110392	0.0836312
ENSG00000176406	RIMS2	0.689189	0.0110642	0.0837501
ENSG00000270558	CTD-2124B8.2	-0.691384	0.0110665	0.0837501
ENSG00000105419	MEIS3	-0.443533	0.0110788	0.0838
ENSG00000023171	GRAMD1B	0.694012	0.0110913	0.0838504
ENSG00000037042	TUBG2	-0.406628	0.0111042	0.083904
ENSG00000162408	NOL9	-0.402481	0.0111334	0.0840809
ENSG00000141664	ZCCHC2	0.490245	0.011146	0.0841326
ENSG00000145675	PIK3R1	0.460441	0.0111858	0.0843886
ENSG00000142046	TMEM91	-0.638174	0.0112026	0.0844353
ENSG00000180398	MCFD2	0.371725	0.0112036	0.0844353
ENSG00000105971	CAV2	0.347951	0.0112159	0.0844533
ENSG00000185591	SP1	0.388225	0.0112181	0.0844533
ENSG00000163041	H3F3A	0.560483	0.0112235	0.0844533
ENSG00000124074	ENKD1	-0.569915	0.0112311	0.0844665
ENSG00000026103	FAS	0.415923	0.0112967	0.0848485
ENSG00000134982	APC	0.462002	0.0113039	0.0848485
ENSG00000169129	AFAP1L2	0.690773	0.011309	0.0848485
ENSG00000175115	PACS1	-0.349532	0.0113133	0.0848485
ENSG00000104983	CCDC61	-0.504258	0.0113168	0.0848485
ENSG00000065613	SLK	0.394908	0.011317	0.0848485
ENSG00000205885	C1RL-AS1	0.56155	0.011335	0.0849392
ENSG00000198695	MT-ND6	-0.398639	0.0113522	0.0850241
ENSG00000170919	TPT1-AS1	-0.538127	0.0113894	0.085259
ENSG00000185880	TRIM69	0.449603	0.0114008	0.0852931
ENSG00000105655	ISYNA1	-0.655047	0.0114058	0.0852931
ENSG00000076944	STXBP2	-0.402994	0.0114423	0.085522
ENSG00000167513	CDT1	-0.436357	0.0115191	0.0860155
ENSG00000080986	NDC80	-0.414078	0.0115202	0.0860155
ENSG00000089505	CMTM1	0.68181	0.0115784	0.0863848
ENSG00000165487	MICU2	-0.388399	0.0115816	0.0863848
ENSG00000183808	RBM12B	0.513617	0.0115929	0.0864246
ENSG00000213160	KLHL23	0.444394	0.0116287	0.0866119
ENSG00000120688	WBP4	-0.455936	0.01163	0.0866119
ENSG00000069329	VPS35	0.367359	0.011646	0.0866867
ENSG00000112414	ADGRG6	0.448803	0.0116528	0.0866928
ENSG00000055917	PUM2	0.370929	0.0116633	0.0867261
ENSG00000131437	KIF3A	0.383919	0.0117248	0.0871249
ENSG00000138078	PREPL	0.423429	0.0117289	0.0871249
ENSG00000078403	MLLT10	0.408534	0.011739	0.0871353
ENSG00000119541	VPS4B	0.379516	0.0117424	0.0871353
ENSG00000164190	NIPBL	0.418527	0.011751	0.0871547
ENSG00000103496	STX4	-0.389303	0.0117658	0.0872201
ENSG00000100239	PPP6R2	-0.347376	0.0117742	0.0872378
ENSG00000196975	ANXA4	0.357036	0.0117822	0.0872519
ENSG00000180998	GPR137C	-0.674807	0.0117964	0.0873125
ENSG00000138061	CYP1B1	0.444138	0.0118226	0.0874618
ENSG00000099219	ERMP1	0.435819	0.011834	0.0875015
ENSG00000125304	TM9SF2	0.370878	0.0118437	0.0875282
ENSG00000131069	ACSS2	0.354838	0.0118636	0.0876308
ENSG00000125731	SH2D3A	0.405838	0.0118938	0.0878094
ENSG00000206561	COLQ	-0.670597	0.0119345	0.0880645
ENSG00000172113	NME6	0.444822	0.0119462	0.088106
ENSG00000230439	RP11-488P3.1	0.352545	0.0119865	0.0883588
ENSG00000173218	VANGL1	0.383893	0.0120005	0.0884164
ENSG00000185000	DGAT1	-0.367349	0.0120112	0.0884506
ENSG00000166912	MTMR10	0.411627	0.0120353	0.0885829
ENSG00000246596	RP11-1277A3.2	0.675353	0.0120682	0.0887802
ENSG00000008294	SPAG9	0.400797	0.0120883	0.0888825
ENSG00000232040	ZBED9	0.614005	0.0121015	0.0889344
ENSG00000139629	GALNT6	0.399107	0.0121131	0.0889748
ENSG00000099821	POLRMT	-0.404296	0.0121266	0.0890285
ENSG00000279786	CTD-2014D20.1	-0.572771	0.0121318	NA
ENSG00000185507	IRF7	-0.58337	0.0121355	0.089049
ENSG00000197045	GMFB	0.359549	0.0121591	0.0891767
ENSG00000116883	RP11-268J15.5	-0.62237	0.012177	0.0892617
ENSG00000130402	ACTN4	0.348005	0.012183	0.0892617
ENSG00000231683	RP1-27K12.2	0.647022	0.0121987	0.0893316
ENSG00000108389	MTMR4	0.441718	0.0122678	0.0897921
ENSG00000175984	DENND2C	0.568061	0.0122914	0.0899199
ENSG00000164933	SLC25A32	0.411537	0.012322	0.090098
ENSG00000185518	SV2B	0.68024	0.0123352	0.0901492
ENSG00000008256	CYTH3	0.379718	0.0123477	0.0901949
ENSG00000096063	SRPK1	0.386786	0.0123711	0.0903203
ENSG00000162813	BPNT1	0.358552	0.0123905	0.0904164
ENSG00000006118	TMEM132A	-0.423113	0.012398	0.0904254
ENSG00000087301	TXNDC16	0.477264	0.0124153	0.0904363
ENSG00000125912	NCLN	-0.360791	0.0124188	0.0904363
ENSG00000158669	GPAT4	-0.345498	0.0124233	0.0904363
[truncated: 1,420 more rows]
