# Supplementary material
Source: HighWire-hosted journal article supplement (doi:10.1101/rna.076422.120)
Supplement: Supplemental_Table_S1_CIRP_targets.xlsx [file Supplemental_Table_S1_CIRP_targets.xlsx]

## Sheet: Legend
Table S1: CIRP targets
The first sheet shows CIRP high confident targets with an indication of whether they were found in other high-throughput studies (Liu et al. Sci Rep 2013; Morph et al, Science 2012)
The following sheets indicate the values obtained for all CIRP targets (padj<0.01, L2FC>1) in any of the comparisons shown in Figure S1C

## Sheet: 204 high confident targets
204-high confident targets	Type	In Liu et al?	In Morf et al?
ABCD1	Protein Coding		YES
ABHD12	Protein Coding
ABHD14B	Protein Coding
AC007040.11	Protein coding
AES	Protein Coding
AGPAT2	Protein Coding
ALDOA	Protein Coding	YES
AP1B1	Protein Coding	YES
AP2A2	Protein Coding		YES
APOPT1	Protein Coding
ARHGDIG	Protein Coding
ARID5A	Protein Coding
ARL2	Protein Coding
ARRDC1-AS1	Protein Coding
ASMTL	Protein Coding
ATP2A3	Protein Coding
ATP5D	Protein Coding
B4GALT2	Protein Coding
BAIAP2L1	Protein coding		YES
BOK	Protein Coding
BORCS7	Protein Coding
C14orf80	Protein Coding
C19orf81	Protein Coding
C1orf167	Protein coding
C7orf50	Protein Coding
CA11	Protein Coding
CALML5	Protein Coding
CAPNS1	Protein Coding	YES
CARM1	Protein Coding	YES
CASKIN1	Protein Coding
CATIP	Protein coding
CATSPER1	Protein Coding
CCDC85B	Protein Coding
CCM2L	Protein Coding
CDT1	Protein Coding
CHPF	Protein Coding
CHST8	Protein coding
CLDN4	Protein Coding
CRK	Protein Coding	YES
CST3	Protein Coding
CTB-25B13.12	ncRNA
CTD-2020K17.4	Protein coding
CTD-3035D6.1	ncRNA
CTSD	Protein Coding
CYBA	Protein Coding
DYRK1B	Protein Coding
E2F1	Protein Coding	YES
ECSIT	Protein Coding
EDF1	Protein Coding
EEFSEC	Protein Coding	YES
EGFL7	Protein Coding
EIF3G	Protein Coding
EPHX1	Protein Coding	YES
ETV4	Protein coding
EXTL3	Protein Coding		YES
FAM109A	Protein Coding
FBXO31	Protein Coding		YES
FCHSD1	Protein Coding
FKBP8	Protein Coding
FNDC10	Protein Coding
FOXM1	Protein Coding	YES
FOXP4	Protein Coding	YES
FZD2	Protein Coding	YES
G6PD	Protein Coding
GDPD5	Protein coding
GPS1	Protein Coding
GPX3	Protein Coding
HCN2	Protein Coding
HOMER3	Protein Coding
IER5L	Protein Coding
IFITM2	Protein Coding
IMPDH2	Protein Coding
INF2	Protein Coding
INTS1	Protein Coding
KAZALD1	Protein Coding
KCNH3	Protein Coding
KLF16	Protein Coding
KMT5C	Protein Coding
LAD1	Protein Coding
LAMTOR2	Protein Coding
LMTK3	Protein Coding
LPAR2	Protein Coding
LRRC10B	Protein Coding
LRRC23	Protein Coding
LRRC26	Protein Coding
LRRC75B	Protein Coding
MACROD1	Protein Coding	YES
MAP2K2	Protein Coding
MAPK11	Protein Coding
MARCH9	Protein Coding
MAZ	Protein Coding	YES
MBD3	Protein Coding
MCRIP2	Protein Coding
MCRS1	Protein Coding
MED16	Protein Coding	YES
MEIS3	Protein Coding
MEPCE	Protein Coding
MGMT	Protein Coding
MISP3	Protein Coding
MLST8	Protein Coding
MPG	Protein Coding
MPND	Protein Coding
MPST	Protein Coding
MRPL12	Protein Coding
MRPL28	Protein Coding
MTFP1	Protein coding
MUC1	Protein Coding
MVB12A	Protein Coding
MVD	Protein Coding
N4BP3	Protein Coding
NAA60	Protein Coding
NAT14	Protein Coding
NBL1	Protein Coding
NCAPH2	Protein Coding
NELFB	Protein Coding
NFKBIL1	Protein Coding
NOC2L	Protein Coding
NOMO1	Protein Coding
OGFR	Protein Coding
PACSIN3	Protein Coding
PCSK1N	Protein Coding
PEMT	Protein Coding
PEX11G	Protein Coding
PGLS	Protein Coding
PHLDA3	Protein Coding		YES
PIGQ	Protein Coding
PKM	Protein Coding
PLCB3	Protein Coding	YES
PLXNB2	Protein Coding
PLXND1	Protein Coding
PMPCA	Protein Coding
POU5F1P6	Pseudogene
PRADC1	Protein Coding
PRPF19	Protein Coding	YES	YES
PRR36	Protein Coding
PRSS8	Protein Coding
PTPA	Protein Coding
PWWP2B	Protein Coding
RABAC1	Protein Coding
RBM42	Protein Coding	YES
RHBDD3	Protein Coding
RN7SL587P	Pseudogene
RNA5SP463	Pseudogene
RNF224	Protein coding
RNPEPL1	Protein Coding
RP11-229D13.3	lncRNA
RP11-284F21.9	ncRNA
RP11-316O14.1	Antisense
RP11-66B24.4	Antisense
RP11-792A8.4	ncRNA
RP13-1032I1.11	Antisense
RP5-1065J22.8	ncRNA
RPL27A	Protein Coding		YES
RPL28	Protein Coding
RPP25	Protein Coding
RRP1	Protein Coding		YES
RRP7A	Protein Coding
RXRB	Protein Coding	YES
S100A11	Protein Coding
SCAND1	Protein Coding
SCARB1	Protein Coding
SEMA6B	Protein Coding
SERGEF	Protein Coding	YES
SEZ6L2	Protein Coding
SF3A2	Protein Coding
SFN	Protein Coding
SH3BP1	Protein Coding
SIL1	Protein Coding		YES
SLC25A10	Protein Coding
SLC2A4RG	Protein Coding
SLC35C1	Protein Coding
SLC39A3	Protein Coding
SLC43A1	Protein Coding
SNF8	Protein Coding
SNORA73B	ncRNA
SPRYD3	Protein coding
SRRM3	Protein Coding
SSR2	Protein Coding	YES	YES
ST14	Protein Coding
STARD10	Protein Coding
STK11	Protein Coding
SULT2B1	Protein Coding
SUN2	Protein coding
TBC1D10B	Protein Coding
THAP3	Protein Coding
TMEM222	Protein Coding	YES
TNFRSF18	Protein Coding
TRIM28	Protein Coding	YES
TSR3	Protein coding
TSSC4	Protein Coding
TXNRD2	Protein Coding
UBTF	Protein Coding	YES
UBXN6	Protein Coding
UQCC3	Protein Coding
UQCRC1	Protein Coding
WDR18	Protein Coding
WDR34	Protein Coding
WNT7B	Protein Coding
ZDHHC12	Protein Coding
ZDHHC18	protein coding
ZMYND10	Protein Coding
ZNF358	Protein Coding
ZNF395	Protein Coding
ZNF526	Protein coding

## Sheet: IP vs Input (all counts)
external_gene_name	ID	log2baseMean_CIRP	log2baseMean_Input	log2FoldChange_CIRP_vs_Input	padj_CIRP_vs_Input
STARD10	ENSG00000214530	15.9288	12.5998	3.30896	2.82858e-132
RPL28	ENSG00000108107	17.1796	14.2741	2.88932	1.57507e-108
CRK	ENSG00000167193	12.5244	9.35965	3.14774	1.69931e-102
RP11-488C13.5	ENSG00000258301	12.5155	8.54463	3.93971	4.38367e-95
PCSK1N	ENSG00000102109	13.5317	10.0054	3.49589	2.16137e-94
AKAP8L	ENSG00000011243	13.9316	11.1096	2.79946	1.81378e-80
CEP131	ENSG00000141577	12.4817	9.33774	3.11654	8.61729e-80
PSMC3	ENSG00000165916	14.0257	10.9081	3.09512	5.39464e-76
PPP1R14B	ENSG00000173457	14.4388	12.0112	2.41787	3.15771e-74
MRPL12	ENSG00000262814	12.5293	9.60979	2.90263	1.51902e-73
ATP5D	ENSG00000099624	13.7746	11.1641	2.59285	1.99162e-72
CBR3-AS1	ENSG00000236830	11.0518	7.85126	3.17713	2.23872e-72
CYBA	ENSG00000051523	14.5092	11.9581	2.53592	1.56454e-64
NFIC	ENSG00000141905	13.2328	10.2748	2.93429	2.3572e-60
EGFL7	ENSG00000172889	13.4142	10.1105	3.27243	2.39405e-59
RPL35	ENSG00000136942	17.4041	14.7886	2.60099	7.97914e-58
PRRT2	ENSG00000167371	11.6216	7.95989	3.61749	1.15018e-56
DDR1	ENSG00000204580	13.1913	11.0549	2.12584	4.54851e-56
EEF1D	ENSG00000104529	14.6099	12.2684	2.32536	5.78659e-56
ATP5I	ENSG00000169020	13.8888	12.0017	1.87872	5.78659e-56
PCYT2	ENSG00000185813	11.6743	8.63229	3.01368	1.09219e-55
SYMPK	ENSG00000125755	12.4717	10.2855	2.17415	4.87649e-55
KIF3B	ENSG00000101350	12.0667	8.42987	3.5912	6.81687e-55
SF3A2	ENSG00000104897	12.6652	10.2652	2.38433	8.60433e-55
AES	ENSG00000104964	14.4234	12.0164	2.38591	3.61925e-53
ADGRL1	ENSG00000072071	14.0719	10.6952	3.33135	1.42142e-52
PIGQ	ENSG00000007541	12.5997	9.44811	3.11871	3.8328e-52
EDF1	ENSG00000107223	14.4042	12.5372	1.8595	1.25416e-51
RABEP2	ENSG00000177548	11.7932	9.43341	2.34586	3.57912e-50
MEIS3	ENSG00000105419	11.5263	8.94554	2.56114	1.51294e-49
SART1	ENSG00000175467	14.15	11.2725	2.85164	2.60927e-49
RBBP8NL	ENSG00000130701	11.6154	9.02183	2.57446	4.66701e-49
IGDCC3	ENSG00000174498	12.3431	9.19503	3.11542	8.89161e-49
DPP7	ENSG00000176978	14.2386	11.7128	2.50178	6.75622e-47
MPG	ENSG00000103152	12.7051	10.2935	2.39655	8.53996e-47
RP11-284F21.9	ENSG00000272068	10.3358	5.77413	4.46207	5.78845e-46
GADD45GIP1	ENSG00000179271	13.8693	11.06	2.77607	4.44162e-45
DNAJC4	ENSG00000110011	11.8191	9.59082	2.21294	4.44162e-45
RALY	ENSG00000125970	14.1839	11.6667	2.49051	6.28611e-45
BSG	ENSG00000172270	16.0092	13.8897	2.10315	8.46119e-44
FKBP8	ENSG00000105701	14.9306	12.0331	2.86154	9.10878e-44
SLC29A4	ENSG00000164638	11.9075	9.02942	2.8443	1.42474e-43
TCOF1	ENSG00000070814	12.5493	9.7423	2.77383	6.21145e-42
ZNF703	ENSG00000183779	14.2203	12.1049	2.09657	4.18531e-41
MRPL23	ENSG00000214026	13.1855	10.0458	3.09462	1.0739e-40
HCFC1R1	ENSG00000103145	13.3754	11.3104	2.04763	1.6808e-40
RNPEPL1	ENSG00000142327	12.8919	9.47399	3.35804	2.51292e-40
CC2D1A	ENSG00000132024	13.2832	10.6189	2.63424	6.53524e-40
PMEPA1	ENSG00000124225	14.4942	12.3079	2.17	5.9519e-39
RPLP0P2	ENSG00000243742	10.3958	6.64583	3.67276	6.26343e-39
MED16	ENSG00000175221	11.2286	7.8748	3.29028	1.47109e-38
PMPCA	ENSG00000165688	11.9327	9.74524	2.17183	3.30281e-38
PRELID1	ENSG00000169230	12.854	11.1106	1.73485	3.34928e-38
MZT2B	ENSG00000152082	14.1414	12.0805	2.04451	3.46524e-38
MAP2K2	ENSG00000126934	13.9581	10.8092	3.09545	4.1039e-38
MPND	ENSG00000008382	12.4505	9.07559	3.31315	4.32879e-38
EPS8L1	ENSG00000131037	12.3724	10.2933	2.06569	6.39706e-38
GDI1	ENSG00000203879	13.1552	11.7292	1.42107	7.79929e-38
INTS1	ENSG00000164880	12.7081	9.92008	2.76118	9.2485e-38
SLC2A4RG	ENSG00000125520	13.8645	11.8685	1.98108	2.89238e-37
KIFC2	ENSG00000167702	13.9454	11.5815	2.33959	3.49041e-37
NUCB1	ENSG00000104805	12.5099	10.2673	2.22137	3.87426e-37
NFATC2IP	ENSG00000176953	12.6685	10.0219	2.6201	5.08251e-37
TRMT1	ENSG00000104907	12.2614	10.1749	2.0702	1.16681e-36
UBTF	ENSG00000108312	12.4686	10.5779	1.87874	3.1327e-36
ECI1	ENSG00000167969	13.0837	10.8723	2.19107	4.17322e-36
WDR74	ENSG00000133316	12.6125	10.0727	2.50819	4.7142e-36
PODXL2	ENSG00000114631	12.5639	9.04001	3.45409	9.22553e-36
NEK8	ENSG00000160602	11.2646	7.3611	3.80745	9.64571e-36
SYT12	ENSG00000173227	11.3216	8.44268	2.84174	1.44351e-35
RPL18	ENSG00000063177	16.7148	15.091	1.61444	4.1042e-35
LTBP3	ENSG00000168056	12.8715	10.7089	2.13807	5.61349e-35
CDT1	ENSG00000167513	12.8093	10.34	2.44339	4.8538e-34
ZFPM1	ENSG00000179588	11.8259	9.02662	2.76621	9.07872e-34
CLDN4	ENSG00000189143	13.0116	11.1571	1.84637	9.7494e-34
PGLS	ENSG00000130313	12.2732	9.90419	2.34424	1.14008e-33
TMEM184A	ENSG00000164855	11.6052	9.54165	2.04937	2.02282e-33
BCAM	ENSG00000187244	12.4368	10.6417	1.78594	2.74566e-33
AGPAT2	ENSG00000169692	14.2149	10.9035	3.24654	3.96314e-33
NMRAL1	ENSG00000153406	12.6335	10.5028	2.1074	4.14941e-33
PKM	ENSG00000067225	14.6159	13.3104	1.30067	6.25459e-33
PTPA	ENSG00000119383	14.5598	11.7737	2.73904	8.82354e-33
SOX4	ENSG00000124766	14.7225	12.1934	2.49776	9.18162e-33
MACROD1	ENSG00000133315	13.3347	10.4079	2.8794	1.93213e-32
MAVS	ENSG00000088888	12.4916	10.1591	2.30666	2.49737e-32
NAA10	ENSG00000102030	12.2954	10.6515	1.63397	1.02671e-31
SFN	ENSG00000175793	11.6113	9.25266	2.33633	1.0982e-31
PRKCSH	ENSG00000130175	14.1608	11.8986	2.23583	1.14194e-31
REEP6	ENSG00000115255	11.231	9.33895	1.87956	1.57062e-31
TSSC4	ENSG00000184281	10.806	7.69765	3.05252	2.15893e-31
PACSIN3	ENSG00000165912	12.5749	10.3015	2.25244	3.53676e-31
IER5L	ENSG00000188483	14.7213	11.8073	2.86031	5.43987e-31
COPE	ENSG00000105669	13.379	11.4219	1.94623	6.70024e-31
SLC39A3	ENSG00000141873	10.2459	7.27248	2.93059	7.94727e-31
EEF1A2	ENSG00000101210	14.7031	12.4746	2.20244	7.96327e-31
G6PD	ENSG00000160211	13.6445	11.2196	2.40629	8.06799e-31
DDAH2	ENSG00000213722	14.0211	11.8433	2.15383	8.06799e-31
SCAND1	ENSG00000171222	12.2576	9.78113	2.43871	2.22124e-30
RP11-44M6.3	ENSG00000184414	8.61985	2.08575	6.15087	3.77227e-30
PRR36	ENSG00000183248	12.2552	9.61975	2.60397	4.55304e-30
ASGR1	ENSG00000141505	10.9704	6.64824	4.18376	7.64239e-30
GAA	ENSG00000171298	12.7687	10.7796	1.97214	3.42298e-29
TMEM254-AS1	ENSG00000230091	10.3191	6.37574	3.80895	4.17143e-29
EVL	ENSG00000196405	13.9379	12.3674	1.56111	6.36717e-29
DYNC1I2	ENSG00000077380	10.533	7.38556	3.0818	6.67844e-29
INO80E	ENSG00000169592	13.4638	11.4811	1.96472	9.23671e-29
PPIB	ENSG00000166794	14.354	13.0811	1.26697	1.16456e-28
PDZD4	ENSG00000067840	11.124	8.71241	2.38271	1.44632e-28
DDX39A	ENSG00000123136	13.5555	11.7408	1.79749	1.44632e-28
RP11-54O7.16	ENSG00000272438	10.6845	5.63832	4.82819	5.51439e-28
CTB-25B13.12	ENSG00000267317	10.0997	6.68026	3.3391	5.51439e-28
DBP	ENSG00000105516	11.0684	9.10597	1.94606	5.59137e-28
MZT2A	ENSG00000173272	12.8373	10.7495	2.07499	5.72558e-28
IFITM3	ENSG00000142089	12.6392	10.9075	1.72183	6.76921e-28
MRPL41	ENSG00000182154	13.8413	11.7885	2.03271	7.25524e-28
SLC25A10	ENSG00000183048	12.3513	9.24582	3.05249	1.46559e-27
C14orf132	ENSG00000227051	11.7336	7.69611	3.92437	1.84177e-27
DSCAM-AS1	ENSG00000235123	16.0431	14.0068	2.02499	2.52741e-27
C9orf142	ENSG00000148362	13.623	12.0308	1.57928	6.63695e-27
ST14	ENSG00000149418	12.5359	9.44926	3.01841	8.49994e-27
MAP2K7	ENSG00000076984	11.3273	8.85833	2.4369	1.02104e-26
KIF22	ENSG00000079616	13.4126	11.941	1.46351	1.02496e-26
KLF16	ENSG00000129911	11.0449	7.69184	3.26903	3.21323e-26
MVD	ENSG00000167508	12.2917	9.43794	2.79964	3.23294e-26
AUP1	ENSG00000115307	14.1353	12.4523	1.67293	3.89809e-26
HOMER3	ENSG00000051128	10.8351	8.484	2.31818	4.54562e-26
NOSIP	ENSG00000142546	12.0662	9.35119	2.67148	4.99682e-26
TIMP1	ENSG00000102265	12.8247	11.3359	1.48062	5.96656e-26
MYL5	ENSG00000215375	11.2195	9.04507	2.14622	8.14681e-26
MLST8	ENSG00000167965	11.8221	8.90336	2.87939	8.26015e-26
ATP5J2	ENSG00000241468	13.7666	11.7356	2.01101	8.86671e-26
CCDC85B	ENSG00000175602	12.9591	9.41719	3.42721	1.22672e-25
PRR11	ENSG00000068489	11.8414	9.69924	2.1275	1.2883e-25
EIF3G	ENSG00000130811	12.3088	10.0962	2.17902	1.39286e-25
METTL26	ENSG00000130731	13.5976	11.6271	1.95519	1.51875e-25
HSPB1	ENSG00000106211	15.7418	14.5144	1.2205	1.64341e-25
SLC35C1	ENSG00000181830	11.5544	9.95924	1.58547	1.69863e-25
YIPF2	ENSG00000130733	12.0911	10.5822	1.49961	2.40749e-25
CARM1	ENSG00000142453	13.4769	10.9735	2.47558	2.63356e-25
GLTSCR2	ENSG00000105373	14.8634	12.3427	2.48294	3.40799e-25
SURF2	ENSG00000148291	11.6491	9.59714	2.02909	4.31019e-25
S100A13	ENSG00000189171	12.6183	11.2508	1.36178	7.92387e-25
MAPK8IP1	ENSG00000121653	11.2401	8.40949	2.76428	8.03773e-25
RPL8	ENSG00000161016	17.1413	15.3315	1.794	8.14381e-25
MAD2L2	ENSG00000116670	11.1426	9.0034	2.11682	8.3743e-25
TRAPPC12	ENSG00000171853	11.2696	9.65674	1.60366	1.32331e-24
RBM42	ENSG00000126254	11.8362	9.81398	2.00586	1.36482e-24
ENKD1	ENSG00000124074	11.3378	9.06621	2.24187	1.54939e-24
CALML5	ENSG00000178372	10.9602	8.68018	2.24969	2.14797e-24
SGF29	ENSG00000176476	11.2709	9.22561	2.02491	2.68857e-24
TJP3	ENSG00000105289	11.8797	9.60616	2.24028	3.57105e-24
MCRIP1	ENSG00000225663	12.0526	9.35338	2.66044	4.18434e-24
C19orf81	ENSG00000235034	11.5264	9.0402	2.44298	4.96639e-24
RP5-1065J22.8	ENSG00000273382	9.77738	6.15918	3.49281	6.87235e-24
RPL13	ENSG00000167526	16.4271	15.0125	1.40708	7.28997e-24
MAZ	ENSG00000103495	14.9542	12.9304	2.00176	8.25728e-24
MISP	ENSG00000099812	12.2851	10.0369	2.22006	8.34198e-24
TRAPPC2L	ENSG00000167515	12.0891	10.4271	1.6493	1.6277e-23
TMEM222	ENSG00000186501	11.6395	9.13401	2.4635	2.60419e-23
UBALD1	ENSG00000153443	11.4965	9.40484	2.06901	2.7747e-23
MARCH9	ENSG00000139266	11.5703	9.45058	2.10228	3.36541e-23
CLU	ENSG00000120885	12.463	10.3629	2.08598	4.34738e-23
MAD1L1	ENSG00000002822	10.7854	8.28204	2.46409	5.58389e-23
C4orf48	ENSG00000243449	11.9834	9.47596	2.46066	6.1067e-23
B4GALT2	ENSG00000117411	12.4545	9.4934	2.89656	7.33609e-23
HOOK2	ENSG00000095066	12.0091	8.39624	3.48596	8.02637e-23
H2AFX	ENSG00000188486	14.0792	11.998	2.05462	9.46389e-23
ELOF1	ENSG00000130165	12.2834	10.698	1.57299	1.20729e-22
SEC61A1	ENSG00000058262	12.7426	11.1317	1.59735	1.34759e-22
C14orf80	ENSG00000185347	12.107	9.3809	2.66983	1.58452e-22
TBX2	ENSG00000121068	13.5825	11.7661	1.79613	2.70554e-22
ABCA3	ENSG00000167972	12.2238	9.47786	2.68111	4.07365e-22
MUC1	ENSG00000185499	12.6558	10.3386	2.28923	4.36437e-22
C17orf62	ENSG00000178927	11.4009	9.17484	2.19384	5.00331e-22
CTSD	ENSG00000117984	16.0224	13.5314	2.4425	5.11557e-22
RP9P	ENSG00000205763	10.5837	8.14777	2.39627	5.88479e-22
TMEM160	ENSG00000130748	11.3182	8.62211	2.64132	7.84162e-22
PLCB3	ENSG00000149782	12.8321	10.5145	2.29307	8.05246e-22
COL6A2	ENSG00000142173	11.6876	9.12007	2.51479	2.33352e-21
PTDSS2	ENSG00000174915	11.6243	8.62849	2.91919	2.45527e-21
ZNHIT1	ENSG00000106400	12.6983	11.4375	1.25382	2.9719e-21
EMC9	ENSG00000100908	11.3611	9.49321	1.84955	3.27672e-21
MCRS1	ENSG00000187778	12.3538	10.6559	1.68951	4.36341e-21
DPP9	ENSG00000142002	13.1655	10.0529	3.03371	5.02254e-21
RPP25	ENSG00000178718	10.7696	8.54188	2.19681	7.7079e-21
BCL7C	ENSG00000099385	14.1143	11.1606	2.88026	7.95098e-21
RPL27A	ENSG00000166441	16.1835	14.3429	1.82798	8.02375e-21
MYL6B	ENSG00000196465	11.7198	9.88392	1.81982	8.2862e-21
ZNF124	ENSG00000196418	9.15643	5.41242	3.59121	8.87181e-21
C19orf53	ENSG00000104979	13.086	11.8126	1.26587	9.16864e-21
RRP1	ENSG00000160214	11.9152	9.60538	2.27155	9.21618e-21
PLXND1	ENSG00000004399	13.4879	11.3836	2.07254	9.21618e-21
COPS6	ENSG00000168090	12.5359	11.0012	1.5257	9.74474e-21
MBD3	ENSG00000071655	12.4774	9.42062	2.9738	1.14377e-20
FSTL3	ENSG00000070404	12.5457	9.66131	2.81348	1.21159e-20
TPD52L2	ENSG00000101150	13.3564	11.5785	1.76197	1.21159e-20
PQBP1	ENSG00000102103	12.3737	10.6986	1.66388	1.64054e-20
SRM	ENSG00000116649	11.2785	9.53138	1.73026	1.89136e-20
PGP	ENSG00000184207	11.7139	9.70987	1.97757	1.95098e-20
KRT18	ENSG00000111057	16.7168	14.7716	1.92121	2.41206e-20
EIF4EBP1	ENSG00000187840	12.7578	11.1674	1.57645	2.41446e-20
MPST	ENSG00000128309	12.8576	10.5378	2.2799	2.71897e-20
SULT2B1	ENSG00000088002	11.4638	9.29892	2.13896	2.86615e-20
SEMA3B	ENSG00000012171	12.8424	10.935	1.89258	3.12479e-20
MGMT	ENSG00000170430	11.3354	9.27896	2.03122	3.18831e-20
DNAJB2	ENSG00000135924	11.3908	9.11732	2.23124	3.32484e-20
SSR2	ENSG00000163479	14.5677	12.6304	1.92739	3.51736e-20
AURKAIP1	ENSG00000175756	12.447	10.4176	2.00432	3.52197e-20
KB-1732A1.1	ENSG00000253669	8.6115	3.24297	4.98053	4.64174e-20
ARID5A	ENSG00000196843	10.1759	7.48592	2.62837	5.3669e-20
FNDC10	ENSG00000228594	12.417	9.29862	3.02047	6.29262e-20
PLEKHN1	ENSG00000187583	9.97298	7.67938	2.25987	6.29262e-20
SUGP1	ENSG00000105705	11.4489	9.59997	1.83292	6.66993e-20
PSMD4	ENSG00000159352	13.8118	12.1075	1.69431	7.59513e-20
AZU1	ENSG00000172232	9.67174	7.36351	2.27324	8.11358e-20
TM7SF2	ENSG00000149809	12.8692	11.5726	1.28937	8.28711e-20
LMNA	ENSG00000160789	12.7467	11.0793	1.65207	9.39707e-20
FAM50A	ENSG00000071859	13.1337	11.4319	1.68857	1.02128e-19
MAPK11	ENSG00000185386	9.51675	5.94703	3.44353	1.05328e-19
ZNF213	ENSG00000085644	10.6634	8.23408	2.39056	1.0778e-19
WDR83	ENSG00000123154	11.9365	8.94173	2.92177	1.11715e-19
NT5DC2	ENSG00000168268	11.9941	9.76919	2.20422	1.93364e-19
PRRX2	ENSG00000167157	10.9911	8.00203	2.93178	1.98523e-19
ZMIZ2	ENSG00000122515	12.1703	10.4071	1.74594	2.05545e-19
NDUFA3	ENSG00000170906	12.3715	10.618	1.73737	2.24107e-19
NSMF	ENSG00000165802	12.3902	9.76354	2.56912	2.40596e-19
ZNF358	ENSG00000198816	13.1063	9.56681	3.39174	2.46418e-19
ILF3-AS1	ENSG00000267100	11.7255	8.91434	2.74499	2.56333e-19
HCN2	ENSG00000099822	11.8208	8.22962	3.45225	2.72443e-19
MVB12A	ENSG00000141971	11.1678	8.87495	2.25418	3.66933e-19
MCRIP2	ENSG00000172366	11.4626	9.41938	2.01346	6.24866e-19
STK11	ENSG00000118046	12.7119	10.0817	2.57177	6.8172e-19
CTD-2589H19.6	ENSG00000271781	9.0087	5.60482	3.30279	7.25316e-19
PACS2	ENSG00000179364	13.1245	10.6258	2.44514	8.84629e-19
ADRM1	ENSG00000130706	13.0717	11.0875	1.95354	9.16497e-19
FO538757.1	ENSG00000279457	10.6105	8.08329	2.47732	1.03195e-18
N4BP3	ENSG00000145911	12.886	9.63403	3.13072	1.09258e-18
CHPF	ENSG00000123989	12.4157	9.90834	2.45241	1.29297e-18
TESK1	ENSG00000107140	10.6831	8.61105	2.04018	1.43419e-18
ITGB4	ENSG00000132470	13.4739	11.7081	1.74582	2.00243e-18
TP53I11	ENSG00000175274	12.1894	9.97796	2.17491	2.09484e-18
IRF3	ENSG00000126456	11.129	9.71124	1.4089	2.22059e-18
FOXM1	ENSG00000111206	11.8823	9.95356	1.90395	2.32952e-18
GRK6	ENSG00000198055	11.593	9.51333	2.05411	2.34664e-18
ASPSCR1	ENSG00000169696	11.3187	8.97306	2.30681	2.40608e-18
AC018442.1	ENSG00000235683	9.92506	3.70684	5.46996	2.52492e-18
MRPS26	ENSG00000125901	12.1239	10.6139	1.5033	3.14097e-18
KMT5C	ENSG00000133247	11.2659	9.4917	1.75246	3.58622e-18
C2orf81	ENSG00000159239	10.5945	8.22396	2.32202	3.63088e-18
C1orf159	ENSG00000131591	10.9737	9.2162	1.73836	4.75875e-18
UCP2	ENSG00000175567	13.2477	11.5743	1.65605	4.98003e-18
CERCAM	ENSG00000167123	12.8462	10.9659	1.85252	5.1684e-18
MRPL28	ENSG00000086504	12.9573	10.4912	2.41181	5.46249e-18
SNX8	ENSG00000106266	10.5196	8.21685	2.26518	5.46249e-18
TRIM28	ENSG00000130726	13.5086	12.1109	1.38958	6.01424e-18
FAM109A	ENSG00000198324	10.4139	7.20793	3.10477	6.02846e-18
WDR34	ENSG00000119333	14.6257	11.9234	2.63313	6.1672e-18
AAK1	ENSG00000115977	10.527	7.81482	2.66012	9.16912e-18
GABPB2	ENSG00000143458	10.3671	8.2142	2.12674	1.1149e-17
BOP1	ENSG00000261236	11.1107	9.2004	1.8833	1.24992e-17
RP4-724E16.2	ENSG00000197670	8.72549	4.75232	3.79237	2.6728e-17
CCM2	ENSG00000136280	12.581	10.0684	2.45174	3.12122e-17
TNIP1	ENSG00000145901	11.716	9.61493	2.06782	3.35033e-17
CTSA	ENSG00000064601	12.4034	11.1353	1.25979	3.54736e-17
RP11-480I12.5	ENSG00000214796	9.64018	6.74811	2.80933	3.66698e-17
GPX3	ENSG00000211445	10.3181	7.95989	2.31581	3.79417e-17
MLXIP	ENSG00000175727	12.04	9.90176	2.10607	4.11092e-17
HSP90AB4P	ENSG00000282100	8.9589	2.44967	5.57763	4.49736e-17
RPS19BP1	ENSG00000187051	11.1704	9.32724	1.82074	5.13242e-17
UQCRC1	ENSG00000010256	11.9722	9.80761	2.12309	5.54388e-17
DDX54	ENSG00000123064	11.1612	9.23416	1.90357	6.25993e-17
CTD-2349P21.5	ENSG00000263603	9.25117	2.30112	5.77346	6.52355e-17
SLC25A11	ENSG00000108528	11.3762	9.5971	1.76241	8.07235e-17
RPUSD1	ENSG00000007376	11.6118	8.98994	2.57456	8.16709e-17
ARID3A	ENSG00000116017	10.9318	8.96709	1.93907	9.38045e-17
SLC25A1	ENSG00000100075	12.888	10.7358	2.11403	1.13846e-16
HMG20B	ENSG00000064961	12.3313	10.7882	1.52619	1.21015e-16
POLR2J	ENSG00000005075	13.2581	12.0998	1.15139	1.4186e-16
AC002044.4	ENSG00000272330	8.57838	5.17677	3.28494	1.45324e-16
ADAP1	ENSG00000105963	11.4875	8.01675	3.34732	1.52156e-16
DMWD	ENSG00000185800	10.6436	7.37418	3.15339	1.533e-16
H2AFJ	ENSG00000246705	13.764	12.1624	1.59068	1.76536e-16
CDC20	ENSG00000117399	11.0787	9.55421	1.50894	2.23148e-16
MAP3K11	ENSG00000173327	12.9113	9.64643	3.12558	2.31502e-16
CDK10	ENSG00000185324	13.2377	11.321	1.88906	2.36777e-16
TCF25	ENSG00000141002	12.5686	10.6169	1.91927	2.54481e-16
RP11-496I9.1	ENSG00000254815	11.0532	9.151	1.87489	2.75068e-16
IDH3G	ENSG00000067829	12.2942	10.4846	1.78815	3.03064e-16
NBL1	ENSG00000158747	10.8201	8.37242	2.40059	3.03472e-16
SAMD1	ENSG00000141858	12.8102	11.4014	1.4014	3.19578e-16
SEMA6B	ENSG00000167680	10.6809	7.51515	3.04593	3.42606e-16
SMIM22	ENSG00000267795	10.5112	8.8687	1.62637	3.73293e-16
SEMA3F	ENSG00000001617	12.1761	10.1213	2.02469	4.32203e-16
MAPK3	ENSG00000102882	11.9193	10.1772	1.73019	4.67271e-16
GAPDH	ENSG00000111640	16.7812	15.7585	1.02012	5.42726e-16
MMP17	ENSG00000198598	11.4535	8.59745	2.7842	5.46848e-16
ZNF282	ENSG00000170265	9.83463	7.68322	2.11517	5.78261e-16
SLC39A4	ENSG00000147804	11.4112	9.85451	1.54332	6.56892e-16
Z97634.3	ENSG00000236829	8.99035	5.21366	3.56317	7.64224e-16
P4HB	ENSG00000185624	14.5125	13.3691	1.1377	9.9674e-16
C5orf38	ENSG00000186493	12.3057	9.82945	2.41346	1.04789e-15
COG8	ENSG00000272617	9.29985	5.43725	3.65559	1.07106e-15
LRRC26	ENSG00000184709	10.094	6.28175	3.62175	1.07563e-15
EIF3B	ENSG00000106263	13.5641	11.7677	1.77307	1.12174e-15
C12orf43	ENSG00000157895	10.324	7.7429	2.52861	1.17642e-15
TXNRD2	ENSG00000184470	9.67342	7.47581	2.1601	1.1838e-15
PRSS8	ENSG00000052344	13.0388	10.9767	2.03429	1.54995e-15
ARRDC1-AS1	ENSG00000203993	10.243	7.61969	2.55287	1.70364e-15
REXO1	ENSG00000079313	10.2776	8.36159	1.88784	1.70931e-15
PPARD	ENSG00000112033	10.3576	8.21716	2.10165	1.76356e-15
GRK2	ENSG00000173020	12.1078	10.4696	1.61768	1.77611e-15
MRPL55	ENSG00000162910	11.3435	8.93973	2.35528	1.84245e-15
CD276	ENSG00000103855	11.9876	10.4275	1.53923	2.21035e-15
TRAPPC9	ENSG00000167632	10.2488	7.88556	2.31789	2.59774e-15
PRPF6	ENSG00000101161	12.9208	10.8441	2.03593	2.71789e-15
ZNF579	ENSG00000218891	10.7575	8.40597	2.28413	3.3904e-15
KCNJ14	ENSG00000182324	10.2788	5.63518	4.26689	3.6498e-15
NDUFA13	ENSG00000186010	12.053	9.65309	2.36678	3.68345e-15
CUEDC1	ENSG00000180891	11.2753	9.54283	1.71134	4.16266e-15
ARHGDIG	ENSG00000242173	10.4299	7.14486	3.16402	4.24146e-15
SH3GLB2	ENSG00000148341	13.3253	11.9213	1.39595	4.26995e-15
TMUB1	ENSG00000164897	12.3731	9.68682	2.60239	4.27162e-15
ASMTL	ENSG00000169093	10.8745	8.5932	2.23835	4.45847e-15
ARFGAP1	ENSG00000101199	13.2136	10.3803	2.73562	5.22941e-15
PRR5	ENSG00000186654	8.9204	5.85917	2.95778	5.37339e-15
LRRC45	ENSG00000169683	10.9505	8.66612	2.24379	7.7483e-15
SIL1	ENSG00000120725	11.2161	8.70188	2.45184	8.21548e-15
CCDC94	ENSG00000105248	11.0747	8.94585	2.0935	8.26295e-15
KCNK6	ENSG00000099337	11.9841	9.90389	2.04841	8.39134e-15
RPS26P45	ENSG00000241765	7.79273	3.00276	4.43183	8.65697e-15
FASTK	ENSG00000164896	12.9125	10.3647	2.47358	1.04668e-14
THAP4	ENSG00000176946	11.2769	8.93942	2.29301	1.15321e-14
WNT7B	ENSG00000188064	10.4067	7.82545	2.51049	1.25759e-14
HSF1	ENSG00000185122	12.9134	10.705	2.17289	1.64143e-14
SPTBN2	ENSG00000173898	10.967	8.8061	2.1226	1.75098e-14
NELFB	ENSG00000188986	11.4355	9.08879	2.29228	1.8024e-14
C19orf33	ENSG00000167644	10.7189	7.97088	2.66136	1.89482e-14
SLC22A31	ENSG00000259803	9.38876	6.11416	3.13032	1.98826e-14
TSTA3	ENSG00000104522	11.9174	10.4238	1.47851	2.30668e-14
ZC3H3	ENSG00000014164	10.5576	8.75044	1.78402	2.6305e-14
MYBL2	ENSG00000101057	12.9869	10.4706	2.44285	3.06209e-14
NDUFS3	ENSG00000213619	12.8051	11.2621	1.52995	3.21478e-14
MATK	ENSG00000007264	11.103	7.61827	3.31751	3.5564e-14
CD2BP2	ENSG00000169217	11.7713	10.2792	1.47334	3.96332e-14
PHACTR4	ENSG00000204138	10.7918	8.08348	2.61598	4.17562e-14
RHBDD2	ENSG00000005486	11.6521	9.80735	1.82369	4.60986e-14
WDR18	ENSG00000065268	10.1289	8.0315	2.06099	4.78709e-14
PLPPR3	ENSG00000129951	9.96896	6.14535	3.60811	5.16936e-14
PSMC5	ENSG00000087191	13.6929	11.5593	2.09161	5.24793e-14
HS1BP3	ENSG00000118960	10.5219	8.47355	2.01173	5.76415e-14
SLC43A1	ENSG00000149150	10.0678	7.7959	2.22285	6.33715e-14
NDUFS8	ENSG00000110717	12.3794	10.3422	2.00555	6.43301e-14
ZNF316	ENSG00000205903	10.8039	9.30405	1.48543	7.99869e-14
PALM	ENSG00000099864	12.6517	9.30584	3.17706	8.64682e-14
RP11-792A8.4	ENSG00000272831	10.6597	8.45105	2.17284	8.64682e-14
LINC00311	ENSG00000179219	8.96502	2.51202	5.44644	8.67282e-14
VPS51	ENSG00000149823	11.9333	9.16443	2.66656	8.84515e-14
HES4	ENSG00000188290	12.1726	10.1939	1.94629	8.89649e-14
RECQL4	ENSG00000160957	12.5734	10.6715	1.86524	9.42868e-14
PYCRL	ENSG00000104524	10.2606	7.59212	2.58695	1.00723e-13
TNNT1	ENSG00000105048	12.2493	10.5338	1.704	1.25735e-13
DMAP1	ENSG00000178028	10.4459	8.54386	1.862	1.34812e-13
NOS1AP	ENSG00000198929	9.65493	5.47075	3.81015	1.40066e-13
SIGIRR	ENSG00000185187	12.7337	10.5869	2.11538	1.41453e-13
LMF1	ENSG00000103227	11.4092	8.48608	2.80744	1.4652e-13
GFOD1	ENSG00000145990	8.73243	6.03412	2.62345	1.74014e-13
CCDC83	ENSG00000150676	9.42977	7.2149	2.16765	1.75617e-13
RPS6KB2	ENSG00000175634	11.4678	9.21789	2.20689	1.78874e-13
H1FX	ENSG00000184897	13.8884	12.5895	1.29162	1.95221e-13
OGFR	ENSG00000060491	12.1501	10.3197	1.79709	2.03068e-13
RP11-54O7.3	ENSG00000223764	12.9889	10.2665	2.62435	2.21682e-13
ARL2	ENSG00000213465	11.0027	8.92298	2.04991	2.35451e-13
NOC2L	ENSG00000188976	12.2558	10.5789	1.65834	2.39771e-13
DYRK1B	ENSG00000105204	11.724	9.16081	2.50505	2.48357e-13
TRAPPC1	ENSG00000170043	12.623	10.249	2.31058	2.61459e-13
CASKIN1	ENSG00000167971	10.2722	8.16484	2.06824	2.74736e-13
EPN1	ENSG00000063245	12.4684	9.95309	2.43794	2.94563e-13
ARHGDIA	ENSG00000141522	13.5689	11.5472	1.97781	3.08658e-13
SLC25A29	ENSG00000197119	13.245	10.616	2.54505	3.241e-13
LAD1	ENSG00000159166	11.7534	9.88925	1.83413	3.25669e-13
CAPS	ENSG00000105519	11.7194	9.95321	1.75295	3.36497e-13
CAPG	ENSG00000042493	10.4666	8.24741	2.1808	3.71472e-13
MIRLET7BHG	ENSG00000197182	9.60668	5.01322	4.20572	3.72676e-13
RRP7A	ENSG00000189306	11.2885	8.71274	2.49946	4.00905e-13
NFKBIL1	ENSG00000204498	10.5013	8.43918	2.01315	4.34537e-13
ZMYND10	ENSG00000004838	9.25941	5.04636	3.87615	5.03479e-13
KRT8	ENSG00000170421	16.1977	14.9889	1.1987	5.21362e-13
DDX56	ENSG00000136271	11.9836	10.7744	1.1985	5.61529e-13
DGCR14	ENSG00000100056	11.0469	9.09829	1.90185	5.73848e-13
CLTB	ENSG00000175416	11.9745	10.0326	1.91652	6.0324e-13
MLXIPL	ENSG00000009950	10.7133	8.5726	2.11161	6.29062e-13
UBXN6	ENSG00000167671	11.3638	8.87246	2.41985	6.37582e-13
CRIP2	ENSG00000182809	12.9931	11.8648	1.1198	6.92851e-13
NPDC1	ENSG00000107281	12.863	11.1106	1.72419	6.96749e-13
TP53I13	ENSG00000167543	12.0358	9.40459	2.54094	7.36377e-13
AP1B1	ENSG00000100280	12.5796	10.1846	2.32375	7.86474e-13
PLPPR2	ENSG00000105520	11.0912	9.4578	1.61985	8.16919e-13
RPS11	ENSG00000142534	16.4775	15.0072	1.46314	8.36999e-13
EEF2	ENSG00000167658	16.4623	14.6823	1.7526	8.82579e-13
EHMT2	ENSG00000204371	11.6959	10.1105	1.56323	9.54034e-13
ZDHHC24	ENSG00000174165	10.9003	8.99332	1.87299	9.57731e-13
GLI4	ENSG00000250571	11.5782	8.68053	2.77254	1.01075e-12
CUX1	ENSG00000257923	12.5025	10.7177	1.7575	1.06981e-12
NAT14	ENSG00000090971	11.7301	8.97996	2.65936	1.12002e-12
RRN3P3	ENSG00000257122	8.48316	5.99471	2.42417	1.12771e-12
RABL6	ENSG00000196642	12.8644	10.8127	2.00874	1.145e-12
ABCD1	ENSG00000101986	10.5317	7.57463	2.85753	1.21071e-12
PPP1R35	ENSG00000160813	11.9653	10.4765	1.46755	1.24949e-12
HSPBP1	ENSG00000133265	10.9413	8.40974	2.45612	1.29362e-12
FZD2	ENSG00000180340	10.0938	7.79771	2.23279	1.39889e-12
HYAL2	ENSG00000068001	11.7392	9.62392	2.09236	1.40464e-12
NUDT22	ENSG00000149761	11.1387	8.84395	2.25021	1.41098e-12
ERBB3	ENSG00000065361	14.9127	12.9571	1.92154	1.51502e-12
PPP1R15A	ENSG00000087074	10.7226	9.29464	1.41231	1.55143e-12
PTOV1	ENSG00000104960	13.116	11.4391	1.65469	1.6706e-12
TMEM54	ENSG00000121900	12.0666	10.3882	1.66473	1.98084e-12
INF2	ENSG00000203485	13.2956	11.0058	2.25267	1.99998e-12
ADPGK	ENSG00000159322	12.1644	9.86667	2.25335	2.24815e-12
E2F1	ENSG00000101412	10.1964	8.55478	1.61945	2.47882e-12
SCAP	ENSG00000114650	10.4944	8.66164	1.80044	2.72117e-12
ARAF	ENSG00000078061	10.7273	9.18305	1.52633	2.73005e-12
Y_RNA	ENSG00000252202	9.11211	3.52396	4.78914	2.75089e-12
RP11-158L12.4	ENSG00000279233	7.81564	3.8918	3.67118	2.95214e-12
LRRC10B	ENSG00000204950	10.3731	7.73839	2.55349	3.03923e-12
C19orf60	ENSG00000006015	10.4649	8.75777	1.68347	3.15875e-12
POLR3H	ENSG00000100413	10.9997	9.09913	1.86571	3.34727e-12
ASPHD1	ENSG00000174939	9.5966	7.37074	2.17063	3.78614e-12
ABHD12	ENSG00000100997	12.1977	10.4385	1.73856	3.98942e-12
SORBS3	ENSG00000120896	10.4773	8.3462	2.09109	4.09406e-12
POLR2I	ENSG00000105258	10.7877	9.48974	1.28761	4.51596e-12
PKN1	ENSG00000123143	13.5071	10.7795	2.62002	4.64609e-12
TUBB4B	ENSG00000188229	14.2231	12.672	1.52987	4.99393e-12
ABHD11	ENSG00000106077	12.4708	10.5555	1.88021	5.34394e-12
DGKZ	ENSG00000149091	11.7939	9.53672	2.19685	5.75861e-12
CIZ1	ENSG00000148337	11.642	9.74753	1.86509	6.57207e-12
CCDC124	ENSG00000007080	12.0666	10.0533	1.96944	6.83513e-12
SHKBP1	ENSG00000160410	10.637	8.71284	1.88917	7.00853e-12
QARS	ENSG00000172053	12.266	10.4916	1.74333	7.28074e-12
POLD1	ENSG00000062822	10.457	8.29538	2.10854	7.78825e-12
IFITM2	ENSG00000185201	11.7373	10.3542	1.36811	7.94794e-12
TFEB	ENSG00000112561	8.67138	5.98098	2.60076	8.19173e-12
BRD3	ENSG00000169925	11.6647	9.6527	1.9778	8.35946e-12
MUC5B	ENSG00000117983	12.1727	10.0655	2.05944	8.41478e-12
SF3B2	ENSG00000087365	13.2356	12.1633	1.06488	8.41478e-12
GPR137	ENSG00000173264	10.1152	8.37223	1.7171	8.88164e-12
ARRDC2	ENSG00000105643	11.5175	10.0956	1.40951	9.13378e-12
LA16c-431H6.6	ENSG00000261732	7.29378	1.72773	4.85529	9.89155e-12
VARS	ENSG00000204394	11.8696	9.87834	1.9484	1.02153e-11
TAPBP	ENSG00000231925	12.6434	11.1142	1.5137	1.02918e-11
LSM7	ENSG00000130332	11.7196	10.2833	1.41751	1.0338e-11
RPS5	ENSG00000083845	13.5307	11.7898	1.71357	1.16584e-11
ACAP3	ENSG00000131584	11.9743	10.1062	1.83733	1.29886e-11
EXTL3	ENSG00000012232	9.65084	7.34626	2.2452	1.38461e-11
NFKBIB	ENSG00000104825	10.219	7.77889	2.35344	1.40928e-11
PI4KB	ENSG00000143393	11.3625	10.0111	1.33653	1.48555e-11
OBSCN	ENSG00000154358	11.4762	9.84869	1.60319	1.61399e-11
ZNF629	ENSG00000102870	10.9499	9.02138	1.88884	1.66548e-11
CA11	ENSG00000063180	10.6488	8.7327	1.8787	1.83949e-11
CALM3	ENSG00000160014	12.031	10.8748	1.14653	1.85067e-11
PPIL2	ENSG00000100023	11.4936	10.3065	1.17857	1.90977e-11
DDB1	ENSG00000167986	12.3577	11.341	1.01026	1.91589e-11
THAP7	ENSG00000184436	11.3043	8.81525	2.39609	2.13653e-11
DHCR7	ENSG00000172893	13.5401	12.1353	1.40113	2.19043e-11
TMEM132A	ENSG00000006118	12.446	10.4182	1.97777	2.3457e-11
ATAD3A	ENSG00000197785	11.1122	8.46218	2.5448	2.46011e-11
KRT19	ENSG00000171345	15.6023	14.156	1.43022	2.46011e-11
HAGHL	ENSG00000103253	11.6981	9.80679	1.861	2.52678e-11
TOB2P1	ENSG00000176933	8.16971	1.83243	5.1603	2.576e-11
MCM5	ENSG00000100297	12.0601	9.74694	2.26956	2.59795e-11
EHBP1L1	ENSG00000173442	11.0903	8.60843	2.39053	2.84024e-11
BAIAP2	ENSG00000175866	10.0955	8.19178	1.86802	2.86963e-11
FAM207A	ENSG00000160256	9.29339	6.688	2.50674	2.89291e-11
AP2A2	ENSG00000183020	11.2348	9.0824	2.11687	3.01275e-11
RNF208	ENSG00000212864	10.853	8.16171	2.5854	3.11779e-11
SMPD2	ENSG00000135587	9.49433	7.41625	2.0289	3.18103e-11
MIB2	ENSG00000197530	10.6854	9.1806	1.48692	3.52365e-11
C7orf50	ENSG00000146540	11.9963	9.68377	2.24165	3.58008e-11
PDDC1	ENSG00000177225	11.5012	8.86284	2.53578	3.59513e-11
PPP2R1A	ENSG00000105568	13.0083	11.947	1.05432	3.73771e-11
FAM234A	ENSG00000167930	13.0923	10.5065	2.48216	3.88472e-11
NAA60	ENSG00000122390	11.6819	9.96043	1.69803	3.99178e-11
LY6E	ENSG00000160932	12.4285	11.1357	1.28427	4.18195e-11
MKL1	ENSG00000196588	10.2118	8.37577	1.80075	4.55306e-11
TNFRSF18	ENSG00000186891	10.5742	7.61026	2.85054	4.62419e-11
AC007040.11	ENSG00000258881	8.01676	3.80477	3.87026	4.63435e-11
GDF11	ENSG00000135414	9.87301	8.3409	1.51439	4.6553e-11
RSAD1	ENSG00000136444	11.0838	9.56036	1.51091	5.20862e-11
MYH14	ENSG00000105357	13.2158	10.806	2.32643	5.2146e-11
CEBPZOS	ENSG00000218739	10.4732	9.18812	1.27389	5.34841e-11
PGGHG	ENSG00000142102	11.3632	9.76034	1.57909	6.06942e-11
EPS8L2	ENSG00000177106	11.5108	10.369	1.13317	6.14594e-11
COL27A1	ENSG00000196739	9.79489	7.22569	2.50049	6.2854e-11
TNK2	ENSG00000061938	13.0266	10.9738	2.01283	6.31507e-11
DRG2	ENSG00000108591	11.074	9.28245	1.76884	7.07973e-11
NUDT14	ENSG00000183828	10.4861	7.76687	2.59795	7.33508e-11
PPAN	ENSG00000130810	9.97363	7.61833	2.28063	7.37903e-11
ADRA2C	ENSG00000184160	11.1369	9.21929	1.89314	7.56989e-11
MEMO1	ENSG00000162959	9.91857	5.50293	3.95207	7.81018e-11
TADA3	ENSG00000171148	12.9015	11.1817	1.71003	8.25328e-11
NT5C	ENSG00000125458	11.5663	10.2926	1.26295	8.2899e-11
MEPCE	ENSG00000146834	11.5011	9.49846	1.9629	8.70036e-11
MFSD12	ENSG00000161091	10.9866	8.31537	2.57584	8.75891e-11
AKT1S1	ENSG00000204673	11.5639	9.91309	1.62376	8.8944e-11
NCAPH2	ENSG00000025770	11.2327	9.25951	1.92704	9.16324e-11
RPL36	ENSG00000130255	13.8734	12.7543	1.1109	9.57981e-11
CDK16	ENSG00000102225	11.9573	10.4414	1.50333	9.70771e-11
GPS1	ENSG00000169727	12.7047	10.5461	2.12787	1.06056e-10
IMPDH2	ENSG00000178035	12.6138	10.5144	2.07487	1.08404e-10
S100A11	ENSG00000163191	16.9587	15.5989	1.34402	1.08404e-10
RHPN1	ENSG00000158106	12.9493	11.0933	1.81403	1.10773e-10
PNPLA6	ENSG00000032444	10.2995	7.78192	2.44319	1.16043e-10
PWWP2B	ENSG00000171813	10.1501	8.11862	1.97768	1.28489e-10
P2RY11	ENSG00000244165	9.93797	7.32983	2.51271	1.28548e-10
CLDN9	ENSG00000213937	12.2978	10.1939	2.04887	1.35917e-10
PSKH1	ENSG00000159792	10.0514	7.77093	2.20033	1.36667e-10
Metazoa_SRP	ENSG00000196274	6.98573	0	5.58287	1.64202e-10
PRDX2	ENSG00000167815	12.2018	10.6986	1.48237	1.64202e-10
RP4-591C20.9	ENSG00000268858	10.4561	7.57546	2.80209	1.88128e-10
PRADC1	ENSG00000135617	10.1333	7.97941	2.08734	1.9094e-10
COX19	ENSG00000240230	10.3793	8.9065	1.45262	1.94834e-10
EPN3	ENSG00000049283	11.3549	8.69555	2.54415	1.95656e-10
GALNT6	ENSG00000139629	9.539	7.18747	2.27952	2.13896e-10
FBXW5	ENSG00000159069	12.2014	9.91708	2.20733	2.83141e-10
SMYD5	ENSG00000135632	10.2214	8.56039	1.63188	2.86457e-10
BCAR1	ENSG00000050820	10.657	9.07388	1.56578	2.94607e-10
AMH	ENSG00000104899	11.5558	9.53184	1.97327	3.19795e-10
YES1P1	ENSG00000224003	7.17592	2.84109	3.93731	3.6988e-10
RP11-51J9.5	ENSG00000271869	8.73751	5.83085	2.77751	3.76757e-10
CTNNBL1	ENSG00000132792	10.9565	8.89191	2.01551	4.35445e-10
ZNF688	ENSG00000229809	10.447	8.527	1.89093	4.37147e-10
UQCC2	ENSG00000137288	12.1492	11.0751	1.06694	4.4072e-10
GPC1	ENSG00000063660	12.1644	9.97015	2.13542	4.49089e-10
PRKCZ	ENSG00000067606	10.1798	8.79576	1.36764	4.49573e-10
KLHDC4	ENSG00000104731	11.8452	9.73256	2.05562	4.57194e-10
CST3	ENSG00000101439	12.7129	11.5608	1.14056	4.57194e-10
CHST8	ENSG00000124302	7.96779	4.53536	3.22457	4.57972e-10
SGTA	ENSG00000104969	12.3603	9.77455	2.47487	4.77607e-10
TRMT61A	ENSG00000166166	11.4191	8.55528	2.71159	4.78112e-10
ANXA11	ENSG00000122359	11.6772	10.3619	1.30213	4.83127e-10
PTPN18	ENSG00000072135	11.0942	9.90243	1.18065	4.946e-10
PEX11G	ENSG00000104883	8.5065	5.07888	3.22949	5.69464e-10
TOP1MT	ENSG00000184428	11.8622	9.94033	1.87529	5.88461e-10
ORAI2	ENSG00000160991	11.5694	8.11815	3.18683	6.19981e-10
ZDHHC12	ENSG00000160446	13.4048	11.2297	2.10658	6.22865e-10
MROH6	ENSG00000204839	10.3707	8.7839	1.56076	6.50247e-10
COL18A1	ENSG00000182871	13.7922	12.2189	1.54665	6.68761e-10
EHD2	ENSG00000024422	10.9842	8.99966	1.94197	7.08454e-10
NOXA1	ENSG00000188747	11.643	9.98667	1.62796	7.23522e-10
BTBD2	ENSG00000133243	12.4033	10.1373	2.20099	7.87691e-10
TBC1D10B	ENSG00000169221	12.1217	10.0596	2.00604	7.99206e-10
PIEZO1	ENSG00000103335	13.452	12.1609	1.27863	7.99206e-10
NARF	ENSG00000141562	11.3928	9.75516	1.62272	8.05654e-10
ADCK5	ENSG00000173137	10.9897	9.01489	1.92926	8.53206e-10
WDR13	ENSG00000101940	11.3717	9.39082	1.92713	8.54778e-10
XYLT2	ENSG00000015532	10.9901	9.19014	1.75378	8.59279e-10
BORCS8	ENSG00000254901	10.271	8.07274	2.13079	8.69879e-10
NME3	ENSG00000103024	12.6437	10.8454	1.77544	9.27704e-10
LRRC75B	ENSG00000178026	10.1088	7.51494	2.49755	9.476e-10
LGALS1	ENSG00000100097	12.5009	11.2263	1.26409	9.476e-10
CORO1B	ENSG00000172725	12.6615	10.5554	2.04216	1.01148e-09
C19orf48	ENSG00000167747	11.5427	9.76659	1.74626	1.04581e-09
RFXANK	ENSG00000064490	12.0946	10.4002	1.67497	1.15593e-09
SLC25A6	ENSG00000169100	14.2685	12.5759	1.66018	1.18417e-09
AMZ1	ENSG00000174945	8.52552	5.68475	2.70682	1.20485e-09
DRAP1	ENSG00000175550	12.8699	11.4538	1.39443	1.21764e-09
SQSTM1	ENSG00000161011	12.2987	10.6916	1.57936	1.22033e-09
YPEL3	ENSG00000090238	13.6353	12.3599	1.26461	1.24578e-09
RP11-548H3.1	ENSG00000273466	8.92789	6.26456	2.57164	1.28664e-09
CBX6	ENSG00000183741	10.9315	9.62859	1.28783	1.29073e-09
FBXL19	ENSG00000099364	9.2344	7.28848	1.89938	1.41299e-09
LTBR	ENSG00000111321	13.3717	11.9393	1.41447	1.42661e-09
FAM89B	ENSG00000176973	11.7022	10.0946	1.58362	1.52433e-09
SURF1	ENSG00000148290	10.7277	9.64983	1.06983	1.59235e-09
SPATA2L	ENSG00000158792	11.8742	8.92811	2.77505	1.60183e-09
HIST1H2BG	ENSG00000273802	8.52392	4.73128	3.46551	1.68313e-09
PRR7-AS1	ENSG00000246334	8.20551	4.10933	3.68795	1.69158e-09
MT-ND6	ENSG00000198695	10.8357	9.36198	1.44907	1.75e-09
BOK	ENSG00000176720	11.8032	8.95247	2.71168	1.76607e-09
NQO2	ENSG00000124588	10.5212	8.9849	1.52092	1.80373e-09
FAM3A	ENSG00000071889	11.8973	9.8875	1.9564	1.92783e-09
RP11-501C14.9	ENSG00000270781	7.88773	2.66206	4.5391	1.95142e-09
RABAC1	ENSG00000105404	11.0603	8.78923	2.22666	1.97092e-09
FAM53B	ENSG00000189319	10.8094	8.14162	2.53939	2.04375e-09
ALDOA	ENSG00000149925	15.8635	14.3565	1.48054	2.07081e-09
ZNF668	ENSG00000167394	9.9226	7.57233	2.2617	2.40007e-09
RACK1	ENSG00000204628	16.3425	14.9878	1.3364	2.42871e-09
ALMS1-IT1	ENSG00000230002	7.47638	4.48881	2.83074	2.49639e-09
TYK2	ENSG00000105397	11.3542	9.99513	1.34901	2.509e-09
PDLIM7	ENSG00000196923	12.1564	11.0987	1.04886	2.68301e-09
LRFN4	ENSG00000173621	11.5499	8.08601	3.18364	2.69232e-09
NME1	ENSG00000239672	13.3544	11.9801	1.3726	2.93968e-09
C8orf82	ENSG00000213563	10.5378	8.83122	1.67431	2.96045e-09
C11orf84	ENSG00000168005	10.6084	9.0331	1.54874	3.26389e-09
C20orf27	ENSG00000101220	10.6002	8.94268	1.62233	3.3464e-09
RAPGEF3	ENSG00000079337	8.84123	5.67932	2.95922	3.37301e-09
PLXNA1	ENSG00000114554	11.1469	9.47354	1.64513	3.6023e-09
PODNL1	ENSG00000132000	8.13651	5.32469	2.68476	3.70316e-09
CAMK2B	ENSG00000058404	10.9132	8.87156	1.99462	3.74382e-09
FLII	ENSG00000177731	11.0704	9.80577	1.2497	3.77362e-09
EVA1B	ENSG00000142694	9.47651	6.57788	2.72271	4.2061e-09
NAB2	ENSG00000166886	12.9951	11.5373	1.45149	4.26117e-09
SLC52A2	ENSG00000185803	11.8063	9.5855	2.13187	4.30146e-09
DNM2	ENSG00000079805	12.7359	10.9565	1.73779	4.32568e-09
MAST4	ENSG00000069020	10.4255	7.58088	2.73995	4.57633e-09
DDX49	ENSG00000105671	11.9938	9.86369	2.06179	4.77943e-09
SPC24	ENSG00000161888	11.7757	10.4255	1.33398	4.91931e-09
SNF8	ENSG00000159210	11.8053	10.3219	1.45368	4.96252e-09
C6orf89	ENSG00000198663	10.8365	9.60338	1.22112	5.03514e-09
SH3BP1	ENSG00000100092	10.4464	8.59355	1.80486	5.06688e-09
CTD-3035D6.1	ENSG00000213315	9.5025	6.47921	2.84033	5.23744e-09
NARFL	ENSG00000103245	11.5002	9.12801	2.2731	5.66479e-09
JARID2	ENSG00000008083	11.4539	10.0121	1.42849	5.70934e-09
CHTF18	ENSG00000127586	11.9099	10.8883	1.01344	5.93694e-09
LIMD2	ENSG00000136490	10.6917	8.54446	2.09729	5.93977e-09
UQCRQ	ENSG00000164405	12.3707	11.2186	1.14925	6.2973e-09
ZNRF1	ENSG00000186187	12.112	11.0989	1.00961	6.82005e-09
FIBP	ENSG00000172500	11.6848	9.74055	1.89779	6.93658e-09
FLAD1	ENSG00000160688	11.36	9.57683	1.74805	6.99265e-09
CTXN1	ENSG00000178531	11.5675	9.12188	2.34302	7.25891e-09
ERCC1	ENSG00000012061	10.5632	8.95099	1.58054	7.30631e-09
ZNF395	ENSG00000186918	11.1228	9.31385	1.77164	7.34509e-09
FADS2	ENSG00000134824	9.45665	7.34317	2.02984	7.55761e-09
CCND1	ENSG00000110092	13.9509	12.9119	1.02985	7.59691e-09
PRPF19	ENSG00000110107	12.7483	10.9707	1.75078	7.65377e-09
CPTP	ENSG00000224051	10.6414	7.88845	2.60469	8.29245e-09
TCEA2	ENSG00000171703	12.3458	10.7654	1.55438	8.33395e-09
PTMS	ENSG00000159335	13.8009	12.5341	1.2523	8.43472e-09
BORCS7	ENSG00000166275	9.59416	7.27105	2.23357	8.62192e-09
TMEM229B	ENSG00000198133	9.55155	5.48446	3.68302	8.65082e-09
TIGD5	ENSG00000179886	9.88134	6.90666	2.78966	8.72694e-09
WDR24	ENSG00000127580	8.83463	6.9486	1.84025	9.47369e-09
DTNB	ENSG00000138101	10.2768	8.3183	1.88513	9.49812e-09
SEPT1	ENSG00000180096	9.32076	6.77864	2.44046	9.51607e-09
IBA57	ENSG00000181873	8.00714	4.91829	2.91794	9.62953e-09
RP11-331F4.5	ENSG00000280152	6.97462	1.75219	4.43101	9.73651e-09
CHKB	ENSG00000100288	9.11025	6.42711	2.54524	1.05277e-08
SLC4A2	ENSG00000164889	11.6029	10.0543	1.52743	1.11789e-08
BRF1	ENSG00000185024	11.8812	9.56079	2.22103	1.13254e-08
CYTH2	ENSG00000105443	11.9135	10.4566	1.44723	1.20107e-08
SMG5	ENSG00000198952	10.3475	8.29143	1.99742	1.20593e-08
CATSPER1	ENSG00000175294	8.75489	5.82406	2.74603	1.20961e-08
SHC2	ENSG00000129946	10.489	7.72138	2.68304	1.25698e-08
SEZ6L2	ENSG00000174938	11.6327	10.0351	1.56852	1.28708e-08
ZNF581	ENSG00000171425	9.85579	7.97198	1.83692	1.37127e-08
TMED9	ENSG00000184840	12.3946	11.34	1.04445	1.38534e-08
PLEKHO1	ENSG00000023902	11.83	10.0818	1.72845	1.47751e-08
CCDC153	ENSG00000248712	9.62422	7.71376	1.86482	1.49602e-08
ARHGAP4	ENSG00000089820	10.1094	8.72401	1.36712	1.54642e-08
TUSC2	ENSG00000114383	10.8735	9.74699	1.11821	1.54797e-08
ETFB	ENSG00000105379	10.5005	8.57119	1.87321	1.59302e-08
PRKD3	ENSG00000115825	9.58755	6.65358	2.74639	1.79292e-08
ZFYVE19	ENSG00000166140	10.6666	8.96915	1.65726	1.8008e-08
LOXL1	ENSG00000129038	13.32	12.0412	1.26573	1.8648e-08
ATP2A3	ENSG00000074370	11.9781	9.4825	2.37739	1.8691e-08
APOLD1	ENSG00000178878	9.26962	7.10237	2.11012	1.93453e-08
RGS16	ENSG00000143333	8.23225	5.20033	2.85851	2.18937e-08
MAP3K10	ENSG00000130758	9.64152	7.93891	1.6735	2.33337e-08
LRRC23	ENSG00000010626	10.0883	6.94569	2.91663	2.33764e-08
NHP2	ENSG00000145912	12.767	11.7257	1.03559	2.40133e-08
GFER	ENSG00000127554	11.0431	8.68045	2.25886	2.48434e-08
REXO4	ENSG00000148300	10.6377	8.53903	2.01795	2.48434e-08
NDUFS7	ENSG00000115286	10.2844	7.97748	2.23757	2.57579e-08
PLXNB2	ENSG00000196576	13.2169	11.7587	1.44673	2.68265e-08
KCNH3	ENSG00000135519	8.76703	6.46899	2.21394	2.7704e-08
GABRD	ENSG00000187730	8.30611	5.73709	2.4479	2.88066e-08
ZNF205	ENSG00000122386	11.6838	8.81318	2.68972	2.88526e-08
ZMYND8	ENSG00000101040	13.1321	11.4948	1.6022	2.90998e-08
GRAMD1A	ENSG00000089351	10.9057	9.23149	1.64635	2.92143e-08
ZNF511	ENSG00000198546	11.4662	9.89497	1.55979	3.11057e-08
RHOC	ENSG00000155366	12.5418	11.1386	1.38563	3.17738e-08
PRRT3	ENSG00000163704	10.5476	8.16464	2.27702	3.18482e-08
TBC1D16	ENSG00000167291	10.1602	8.33629	1.77723	3.34512e-08
SSPO	ENSG00000197558	10.1194	8.42808	1.66334	3.76066e-08
METRN	ENSG00000103260	12.7706	9.79664	2.75486	3.95423e-08
CPSF3L	ENSG00000127054	11.6943	10.2516	1.42161	3.97659e-08
CHMP1A	ENSG00000131165	12.9333	10.6793	2.18209	4.20393e-08
PAGR1	ENSG00000280789	8.86422	5.62105	3.07039	4.81207e-08
TIMM50	ENSG00000105197	11.4481	9.94102	1.49739	4.99585e-08
RP11-104N10.2	ENSG00000274627	10.8756	6.71571	3.59963	5.11088e-08
TBL3	ENSG00000183751	10.9875	9.01384	1.91004	5.18364e-08
FSCN1	ENSG00000075618	11.6474	10.1167	1.51814	5.18364e-08
TAF6L	ENSG00000162227	10.3275	8.48508	1.80395	5.35538e-08
NDUFB7	ENSG00000099795	11.9131	9.98978	1.86804	5.57273e-08
DYM	ENSG00000141627	9.84637	7.93255	1.86016	6.34678e-08
OSGIN1	ENSG00000140961	10.3872	7.62611	2.59668	6.40607e-08
TBRG4	ENSG00000136270	11.7045	10.0697	1.6044	6.89833e-08
CCDC78	ENSG00000162004	11.5449	10.1785	1.34627	7.21684e-08
CTD-2540F13.2	ENSG00000267892	7.64982	4.45968	2.95968	7.24365e-08
IGFBP4	ENSG00000141753	13.5717	12.3228	1.23205	7.26413e-08
LAMTOR2	ENSG00000116586	11.6003	9.88269	1.69799	7.29144e-08
ABL2	ENSG00000143322	10.1413	8.10189	1.9902	7.66196e-08
MC1R	ENSG00000258839	10.7998	7.88381	2.70961	7.90353e-08
IL17RC	ENSG00000163702	11.0693	8.53525	2.40635	8.11165e-08
SEPN1	ENSG00000162430	10.8314	9.29042	1.5101	8.30936e-08
ODF3B	ENSG00000177989	7.07685	3.64877	3.16339	8.56767e-08
SRRM3	ENSG00000177679	11.2616	8.43214	2.66586	8.97232e-08
ITPK1	ENSG00000100605	11.5642	10.4177	1.13915	8.97232e-08
TWF2	ENSG00000247596	9.91832	8.05673	1.82508	9.2337e-08
PTGES2	ENSG00000148334	11.9303	9.86904	1.9806	9.37639e-08
TMC6	ENSG00000141524	11.0602	9.09835	1.94298	9.57487e-08
THBS3	ENSG00000169231	11.4943	10.3911	1.09442	9.59767e-08
RECQL5	ENSG00000108469	11.7577	9.47184	2.18396	1.00104e-07
SPATC1L	ENSG00000160284	10.1321	7.37372	2.66559	1.00106e-07
ZNF444	ENSG00000167685	11.3626	9.20888	2.11719	1.05146e-07
UBTD1	ENSG00000165886	9.06651	6.41584	2.53351	1.0759e-07
ATN1	ENSG00000111676	11.4305	10.173	1.2421	1.09751e-07
NR1H2	ENSG00000131408	11.1558	9.79469	1.34055	1.11266e-07
CLDN3	ENSG00000165215	13.037	11.6959	1.32391	1.14471e-07
THOC6	ENSG00000131652	11.7668	10.2749	1.46182	1.15087e-07
BAD	ENSG00000002330	10.9784	8.48054	2.40072	1.15634e-07
EPHX1	ENSG00000143819	10.5468	8.65984	1.83639	1.18137e-07
RP11-708J19.1	ENSG00000260236	8.06279	4.56377	3.21931	1.19133e-07
ZER1	ENSG00000160445	11.5361	10.0041	1.49688	1.21117e-07
MAP4	ENSG00000047849	12.0858	10.7256	1.34776	1.22931e-07
NAPRT	ENSG00000147813	11.6269	9.90885	1.67349	1.3137e-07
FLNA	ENSG00000196924	14.4329	12.5144	1.86034	1.32031e-07
RP13-890H12.2	ENSG00000267288	8.61524	5.21106	3.10441	1.36839e-07
FAM20C	ENSG00000177706	10.254	8.21547	1.96964	1.4181e-07
SPATA20	ENSG00000006282	12.0512	10.6115	1.42284	1.46937e-07
GNAS-AS1	ENSG00000235590	8.44481	4.65941	3.38682	1.61676e-07
RNA5SP463	ENSG00000199900	7.1098	0	5.0913	1.63835e-07
ZNF837	ENSG00000152475	9.30108	6.11644	2.9295	1.63947e-07
BLOC1S1	ENSG00000135441	11.5097	9.7554	1.74043	1.70848e-07
MKS1	ENSG00000011143	10.754	9.30085	1.42726	1.71935e-07
QRICH2	ENSG00000129646	8.49191	5.50301	2.78294	1.72826e-07
SCAF1	ENSG00000126461	11.2423	9.60311	1.62097	1.72869e-07
AIP	ENSG00000110711	11.5631	9.70406	1.83391	1.74992e-07
HDAC5	ENSG00000108840	10.5468	8.63505	1.85073	1.80559e-07
GTF3C1	ENSG00000077235	12.3794	10.5585	1.76322	1.83985e-07
CDK18	ENSG00000117266	10.9565	9.13748	1.76671	1.84707e-07
ABCF1	ENSG00000204574	10.6895	9.36176	1.30817	1.84707e-07
CHCHD10	ENSG00000250479	10.9556	9.73466	1.20529	1.86419e-07
ATP13A1	ENSG00000105726	11.9134	10.3639	1.53117	1.88341e-07
NCS1	ENSG00000107130	10.7585	9.65377	1.09258	1.88829e-07
SNTA1	ENSG00000101400	9.52263	5.99925	3.25011	1.92021e-07
FAAP100	ENSG00000185504	10.7747	8.73202	1.97518	2.00027e-07
ANKRD16	ENSG00000134461	9.61872	7.52734	2.03873	2.0278e-07
FIBCD1	ENSG00000130720	10.9381	8.67209	2.18846	2.06287e-07
DNASE1	ENSG00000213918	11.7252	9.59971	2.04473	2.08207e-07
ESPN	ENSG00000187017	10.6433	8.55933	2.02882	2.08284e-07
EME2	ENSG00000197774	10.632	9.34751	1.2751	2.09362e-07
CDH3	ENSG00000062038	11.4944	10.1096	1.37913	2.1232e-07
ECE1	ENSG00000117298	11.8029	9.71557	2.03702	2.20559e-07
UCK1	ENSG00000130717	13.0013	11.1137	1.82707	2.23873e-07
RIN1	ENSG00000174791	10.0233	7.73507	2.18354	2.26383e-07
CHD5	ENSG00000116254	9.28785	7.14049	2.06782	2.27885e-07
ZNF296	ENSG00000170684	8.93364	6.91334	1.96376	2.30796e-07
TRAP1	ENSG00000126602	11.3121	10.2135	1.09134	2.37341e-07
SCYL1	ENSG00000142186	12.8771	10.7783	2.02683	2.37681e-07
ENDOV	ENSG00000173818	10.0373	8.89266	1.13197	2.42876e-07
TRAF2	ENSG00000127191	10.8837	8.45452	2.2953	2.51248e-07
KLHL36	ENSG00000135686	12.2816	10.3395	1.88911	2.52614e-07
CTD-3193K9.4	ENSG00000267042	7.58501	4.03131	3.26463	2.53047e-07
RXRA	ENSG00000186350	12.6447	10.5951	1.98612	2.53533e-07
DHRS13	ENSG00000167536	9.51246	7.72956	1.73273	2.6819e-07
FBXW4	ENSG00000107829	10.6995	9.02832	1.64502	2.71069e-07
CLCN7	ENSG00000103249	12.586	10.0658	2.38072	2.73111e-07
UQCC3	ENSG00000204922	11.2555	9.30261	1.8914	2.74694e-07
PLEKHM2	ENSG00000116786	10.9888	8.92432	1.99044	2.86813e-07
TPGS1	ENSG00000141933	9.33239	6.07062	2.9865	2.94165e-07
HMGXB3	ENSG00000113716	10.5176	9.26662	1.23874	3.08131e-07
CSNK1G2	ENSG00000133275	10.4782	9.02335	1.42555	3.12838e-07
RPL32P3	ENSG00000251474	8.21343	5.94621	2.18439	3.52956e-07
VWA1	ENSG00000179403	10.9209	8.61819	2.22164	3.58675e-07
RCC1L	ENSG00000274523	10.6715	9.4559	1.20134	3.63226e-07
SLC7A5	ENSG00000103257	13.241	11.5563	1.63845	3.74037e-07
GMIP	ENSG00000089639	9.72802	8.02698	1.64984	4.30102e-07
CCDC107	ENSG00000159884	10.6055	8.5927	1.9817	4.3218e-07
NINJ1	ENSG00000131669	11.9774	10.5955	1.35925	4.3218e-07
ARFRP1	ENSG00000101246	10.8772	8.20541	2.54507	4.37141e-07
NFE2L1	ENSG00000082641	10.964	9.93326	1.02114	4.41885e-07
CLIP2	ENSG00000106665	9.84882	6.28732	3.15262	4.51343e-07
CLUH	ENSG00000132361	11.2317	9.92388	1.2866	4.74834e-07
RP13-1032I1.11	ENSG00000275902	8.27775	5.66502	2.47086	4.7733e-07
LRFN3	ENSG00000126243	9.55405	5.60316	3.4188	4.84539e-07
ATAD3B	ENSG00000160072	10.5476	8.60393	1.85991	4.91808e-07
IL27RA	ENSG00000104998	9.07746	7.3392	1.70031	5.15694e-07
PUSL1	ENSG00000169972	10.4835	8.43725	1.96808	5.41212e-07
NCOR2	ENSG00000196498	11.3585	9.98054	1.35453	5.42154e-07
LRRC27	ENSG00000148814	9.10814	6.84885	2.16638	5.86242e-07
MGAT1	ENSG00000131446	11.3245	9.32491	1.97479	5.86242e-07
CTDSP1	ENSG00000144579	11.943	10.5733	1.34162	5.88422e-07
SLC43A2	ENSG00000167703	10.3343	7.77136	2.40814	5.915e-07
GIT1	ENSG00000108262	11.5991	9.43613	2.06624	5.95803e-07
UNC45A	ENSG00000140553	11.2297	9.19445	1.95309	6.19654e-07
UBALD2	ENSG00000185262	10.8099	9.39837	1.39838	6.20706e-07
LSR	ENSG00000105699	12.7872	11.4839	1.29673	6.61799e-07
PLEC	ENSG00000178209	14.0659	12.23	1.78378	6.66974e-07
CLIC3	ENSG00000169583	11.0986	9.32126	1.7148	6.99291e-07
ZNF628	ENSG00000197483	8.7671	5.89041	2.69614	7.00203e-07
RHOT2	ENSG00000140983	11.364	10.0316	1.30677	7.24192e-07
RASGEF1C	ENSG00000146090	7.78227	4.47535	3.03084	7.45218e-07
FBF1	ENSG00000188878	9.79594	8.53572	1.24159	7.61774e-07
HR	ENSG00000168453	10.3127	8.243	2.02166	7.65186e-07
NENF	ENSG00000117691	11.5632	10.2216	1.31678	7.75821e-07
CINP	ENSG00000100865	10.9193	9.79507	1.11035	7.92312e-07
FBXO31	ENSG00000103264	9.71057	8.16913	1.51313	8.18858e-07
DPYSL5	ENSG00000157851	7.92082	5.02745	2.68704	8.21028e-07
RPS9	ENSG00000170889	13.1129	11.6411	1.43828	8.28728e-07
AGTRAP	ENSG00000177674	10.3824	8.80577	1.54	8.2888e-07
SLC6A9	ENSG00000196517	10.1891	8.29492	1.82513	8.37265e-07
PPP1CA	ENSG00000172531	12.9308	11.5936	1.32391	8.43342e-07
FBXO2	ENSG00000116661	10.2876	8.21981	1.99141	8.50698e-07
ACSF3	ENSG00000176715	9.97582	8.51352	1.43583	8.53831e-07
GCAT	ENSG00000100116	10.1498	7.87342	2.19859	8.8275e-07
CARS2	ENSG00000134905	10.3982	9.14663	1.24225	8.84399e-07
MAN1B1	ENSG00000177239	12.3621	10.1212	2.14554	8.8587e-07
SH3BP2	ENSG00000087266	11.5512	9.18526	2.23904	8.88447e-07
CCDC137	ENSG00000185298	10.8006	9.13486	1.62033	8.95453e-07
HMOX2	ENSG00000103415	9.49321	8.07262	1.3969	9.01213e-07
RXRB	ENSG00000204231	9.5627	7.964	1.56883	9.14639e-07
NPW	ENSG00000183971	8.22824	6.09172	2.05247	9.41422e-07
CCHCR1	ENSG00000204536	10.5257	8.67003	1.82804	9.57581e-07
LEMD2	ENSG00000161904	10.8388	9.32301	1.48296	9.79901e-07
ENTPD6	ENSG00000197586	11.4238	9.47405	1.88541	1.01038e-06
SPDEF	ENSG00000124664	12.0745	9.95349	2.02451	1.01338e-06
DGCR6L	ENSG00000128185	9.95158	7.79304	2.06021	1.08138e-06
ENDOG	ENSG00000167136	10.2881	8.6161	1.63892	1.09273e-06
MYO9B	ENSG00000099331	10.5156	8.96878	1.51947	1.10757e-06
C17orf96	ENSG00000273604	9.24499	7.33066	1.86186	1.10885e-06
LMTK3	ENSG00000142235	12.379	10.4946	1.83371	1.10885e-06
HSPG2	ENSG00000142798	10.3257	8.72802	1.56392	1.10885e-06
DNAJC17	ENSG00000104129	10.0298	8.16038	1.80525	1.11817e-06
RP5-902P8.12	ENSG00000260179	6.04635	0.329242	4.33194	1.1339e-06
MARK4	ENSG00000007047	10.5663	8.47184	2.02371	1.15697e-06
TAOK2	ENSG00000149930	11.8989	10.3478	1.51664	1.16481e-06
CES2	ENSG00000172831	9.2553	6.92147	2.21895	1.18591e-06
CUL9	ENSG00000112659	9.91605	8.53292	1.35219	1.20589e-06
KAT8	ENSG00000103510	11.054	9.68766	1.34113	1.20589e-06
CAMTA2	ENSG00000108509	9.68168	8.13025	1.5167	1.20627e-06
RPL13P12	ENSG00000215030	10.5522	9.2452	1.2956	1.20737e-06
STX10	ENSG00000104915	11.9637	10.3043	1.6538	1.23246e-06
KAZALD1	ENSG00000107821	9.4995	7.41984	2.02283	1.234e-06
RIN3	ENSG00000100599	8.34568	5.78385	2.40965	1.23617e-06
LONP1	ENSG00000196365	11.5724	9.87697	1.64736	1.25572e-06
EIF4G1	ENSG00000114867	11.5104	10.2005	1.29054	1.26926e-06
ABHD14B	ENSG00000114779	10.9336	9.06205	1.8287	1.3205e-06
NPLOC4	ENSG00000182446	11.3977	9.44264	1.88856	1.32334e-06
EXD3	ENSG00000187609	10.5189	9.09426	1.40226	1.33113e-06
RTFDC1	ENSG00000022277	12.1444	10.9339	1.20653	1.34608e-06
ARHGAP45	ENSG00000180448	9.37772	7.23653	2.05411	1.36966e-06
CASZ1	ENSG00000130940	8.93443	6.81362	2.02542	1.36966e-06
LAG3	ENSG00000089692	9.02291	7.10945	1.83617	1.39402e-06
HTT	ENSG00000197386	11.2713	10.0704	1.18451	1.39402e-06
ASCL1	ENSG00000139352	8.60885	5.54875	2.82632	1.42506e-06
RP11-212P7.2	ENSG00000273270	8.67181	5.93269	2.59422	1.43123e-06
HRAS	ENSG00000174775	12.2437	9.96767	2.17487	1.49517e-06
KCNQ1OT1	ENSG00000269821	10.8968	7.88471	2.74851	1.51808e-06
DMPK	ENSG00000104936	10.7325	9.38748	1.32187	1.54903e-06
FAAH	ENSG00000117480	10.543	8.70756	1.78443	1.54906e-06
TLE3	ENSG00000140332	10.7447	9.714	1.02149	1.59591e-06
ADAM29	ENSG00000168594	7.00043	2.32553	3.83506	1.63215e-06
RPS15	ENSG00000115268	12.8789	11.3303	1.50797	1.69336e-06
GAS2L1	ENSG00000185340	10.4215	8.12041	2.18144	1.69653e-06
ATG4D	ENSG00000130734	9.97654	8.208	1.70385	1.69993e-06
ENTPD2	ENSG00000054179	9.98563	7.91096	1.96319	1.71475e-06
LINC01252	ENSG00000247157	9.01314	5.31478	3.24298	1.71918e-06
RP11-348N5.9	ENSG00000278601	8.46874	4.43198	3.39289	1.74517e-06
PYCARD	ENSG00000103490	10.9384	9.75872	1.16453	1.75692e-06
PRRC2A	ENSG00000204469	12.1383	10.9411	1.19136	1.75743e-06
ECSIT	ENSG00000130159	10.3751	8.50693	1.82598	1.78107e-06
CYSRT1	ENSG00000197191	8.49979	5.82734	2.49429	1.78782e-06
SERTAD3	ENSG00000167565	11.3077	10.1646	1.12561	1.80157e-06
CHST12	ENSG00000136213	10.387	8.00436	2.25897	1.82402e-06
LAMB2	ENSG00000172037	10.567	9.29136	1.25459	1.89019e-06
ALDH16A1	ENSG00000161618	10.5307	9.23136	1.27703	1.97473e-06
CRLF1	ENSG00000006016	10.9852	9.0113	1.90551	2.05733e-06
SNRPA	ENSG00000077312	12.4294	11.2547	1.15856	2.09376e-06
GSC	ENSG00000133937	9.20283	7.13379	1.9953	2.32151e-06
SCNM1	ENSG00000163156	11.5499	10.4228	1.11169	2.32763e-06
AP5Z1	ENSG00000242802	10.9205	9.55187	1.33987	2.353e-06
C19orf70	ENSG00000174917	10.3678	8.39606	1.89004	2.35714e-06
NSMCE1	ENSG00000169189	11.4893	10.1261	1.34526	2.35857e-06
DDX41	ENSG00000183258	11.7082	10.5593	1.13062	2.36806e-06
GNL1	ENSG00000204590	10.7388	9.45242	1.27506	2.39938e-06
KIAA1683	ENSG00000130518	11.2209	9.05385	2.05636	2.47389e-06
TMEM86B	ENSG00000180089	8.81481	5.96246	2.64948	2.58023e-06
PARP10	ENSG00000178685	8.23363	5.29757	2.70862	2.61152e-06
TNFAIP8L1	ENSG00000185361	8.78539	6.61116	2.07103	2.66035e-06
NOMO1	ENSG00000103512	10.7539	9.07603	1.66259	2.78179e-06
GTF3C5	ENSG00000148308	11.9486	10.2577	1.64352	2.87107e-06
FGD1	ENSG00000102302	10.4178	8.60542	1.76503	2.88011e-06
MAF1	ENSG00000179632	12.5508	10.5824	1.8869	2.91679e-06
LMX1B	ENSG00000136944	10.0617	8.32227	1.68728	2.92577e-06
MIIP	ENSG00000116691	9.58997	7.87143	1.68293	2.93867e-06
SMG6	ENSG00000070366	10.3933	7.83423	2.38205	2.96343e-06
SHROOM1	ENSG00000164403	9.48376	5.8445	3.14192	2.99066e-06
CYHR1	ENSG00000187954	12.1205	10.0235	1.99426	3.00773e-06
PPP1R7	ENSG00000115685	10.9459	9.80247	1.12728	3.41621e-06
LCAT	ENSG00000213398	9.27352	7.64923	1.59129	3.4281e-06
PANX2	ENSG00000073150	8.85261	6.58545	2.15483	3.46438e-06
WDTC1	ENSG00000142784	9.4485	8.15143	1.27487	3.46438e-06
STAP2	ENSG00000178078	11.611	9.48338	2.0244	3.49709e-06
LPAR2	ENSG00000064547	10.4432	8.21462	2.16599	3.56973e-06
SUPT6H	ENSG00000109111	11.0048	9.5962	1.40188	3.63565e-06
C1QTNF6	ENSG00000133466	10.5759	8.59183	1.89435	3.7065e-06
TUT1	ENSG00000149016	10.478	8.96261	1.48242	3.71094e-06
CNTROB	ENSG00000170037	11.0696	9.85008	1.19331	3.92402e-06
NPRL3	ENSG00000103148	11.1579	9.62292	1.49196	4.1356e-06
TUBGCP2	ENSG00000130640	10.7593	9.29463	1.42993	4.1356e-06
CAPNS1	ENSG00000126247	13.9011	12.2415	1.61621	4.20655e-06
RP11-54O7.1	ENSG00000230699	8.82968	4.72195	3.42334	4.24315e-06
RP4-605O3.4	ENSG00000272368	7.86272	4.55423	3.00716	4.35125e-06
SH2B2	ENSG00000160999	9.48367	7.11753	2.29484	4.72894e-06
FPGS	ENSG00000136877	10.5336	8.79625	1.69961	4.78721e-06
LPIN3	ENSG00000132793	10.51	9.32329	1.1675	5.28903e-06
SSBP4	ENSG00000130511	11.6035	10.2939	1.28386	5.55283e-06
HGS	ENSG00000185359	12.1095	10.8084	1.29057	5.93792e-06
TPM2	ENSG00000198467	12.1965	10.7931	1.36939	5.94948e-06
RBM10	ENSG00000182872	11.2488	9.99562	1.23696	5.98699e-06
ELP6	ENSG00000163832	9.30029	7.84358	1.42627	6.09856e-06
LZTS2	ENSG00000107816	10.9806	9.85564	1.11432	6.25907e-06
SLC4A3	ENSG00000114923	9.36929	7.21946	2.05749	6.67372e-06
TMEM41A	ENSG00000163900	10.1701	8.90963	1.24837	6.8363e-06
SON	ENSG00000159140	11.8085	9.98761	1.74616	7.03482e-06
PDXK	ENSG00000160209	12.6747	11.2208	1.41783	7.1124e-06
ATAD3C	ENSG00000215915	9.02877	6.10916	2.65305	7.13075e-06
PRX	ENSG00000105227	8.05247	4.23799	3.26132	7.16515e-06
KIAA0930	ENSG00000100364	10.5464	8.00991	2.45275	7.46371e-06
METRNL	ENSG00000176845	12.1229	10.7811	1.32039	7.71314e-06
RN7SL233P	ENSG00000242971	7.87824	3.92707	3.48567	7.71483e-06
DOT1L	ENSG00000104885	9.68867	7.82994	1.78858	7.83378e-06
ZNF821	ENSG00000102984	9.79708	7.92464	1.80706	7.93424e-06
ZMYND19	ENSG00000165724	10.7675	9.61926	1.12537	8.34029e-06
RGS12	ENSG00000159788	9.95177	8.58754	1.33906	8.78825e-06
PHLDA3	ENSG00000174307	12.066	10.4384	1.61486	8.96515e-06
NPIPP1	ENSG00000188599	9.41054	7.81459	1.55116	9.33296e-06
PHC2	ENSG00000134686	10.5447	8.48778	2.01616	9.39983e-06
TELO2	ENSG00000100726	11.4234	9.60931	1.7443	9.99525e-06
HIPK1-AS1	ENSG00000235527	8.66033	5.97408	2.47682	1.08874e-05
KBTBD6	ENSG00000165572	8.24995	6.58517	1.61675	1.09722e-05
RP11-717D12.1	ENSG00000214773	6.5242	2.25176	3.50284	1.17738e-05
HIST1H1B	ENSG00000184357	7.57256	3.09076	3.67	1.20326e-05
STRN4	ENSG00000090372	11.064	9.89578	1.1634	1.21392e-05
RP11-332E4.1	ENSG00000214748	8.03526	5.43485	2.40813	1.22888e-05
EEF1DP1	ENSG00000228887	7.45951	4.79464	2.47064	1.23917e-05
RP11-417O11.5	ENSG00000225761	6.85076	1.61381	3.93348	1.25601e-05
HAUS7	ENSG00000213397	9.44784	7.31556	2.02902	1.26157e-05
NUMA1	ENSG00000137497	13.3024	12.0545	1.22278	1.28859e-05
LINC00482	ENSG00000185168	7.95523	5.00233	2.68418	1.33908e-05
PREB	ENSG00000138073	11.0678	9.35531	1.70214	1.3558e-05
CTD-2062F14.2	ENSG00000258500	6.85984	3.06216	3.30129	1.42278e-05
TRMT2A	ENSG00000099899	11.4629	9.88309	1.56994	1.4299e-05
HID1	ENSG00000167861	12.0944	10.5459	1.52925	1.44627e-05
DVL3	ENSG00000161202	11.2061	10.1044	1.08605	1.48178e-05
PACS1	ENSG00000175115	11.0966	9.98739	1.09265	1.48856e-05
FGFRL1	ENSG00000127418	10.9986	8.81522	2.11655	1.50654e-05
FUK	ENSG00000157353	9.93033	8.64518	1.26313	1.54011e-05
HINT2	ENSG00000137133	10.0057	8.90462	1.08708	1.54296e-05
RIMS4	ENSG00000101098	9.49814	6.81111	2.45062	1.54612e-05
PFKL	ENSG00000141959	11.6526	9.86165	1.71656	1.55952e-05
ZNF414	ENSG00000133250	8.83128	6.7517	1.98976	1.61138e-05
PAFAH1B3	ENSG00000079462	10.8279	8.99159	1.78743	1.65107e-05
SYNE4	ENSG00000181392	9.61026	8.2966	1.2866	1.65107e-05
RP11-429J17.5	ENSG00000254548	6.8442	3.26014	3.12105	1.66476e-05
PHKG2	ENSG00000156873	11.5023	10.3738	1.11062	1.68265e-05
ACY1	ENSG00000243989	6.989	3.6388	2.98847	1.72663e-05
ANKRD52	ENSG00000139645	9.86108	8.33826	1.47916	1.72952e-05
E4F1	ENSG00000167967	11.8665	10.6269	1.21515	1.74447e-05
MROH1	ENSG00000179832	11.6545	10.0843	1.51965	1.75289e-05
SPPL2B	ENSG00000005206	11.4648	9.79163	1.61228	1.75365e-05
CORO7	ENSG00000262246	10.1869	8.31783	1.79151	1.77259e-05
TPRN	ENSG00000176058	10.7971	8.28032	2.39431	1.79318e-05
SAC3D1	ENSG00000168061	10.679	9.225	1.41438	1.80616e-05
ABCA7	ENSG00000064687	9.80497	7.41084	2.24613	1.90443e-05
SEC14L2	ENSG00000100003	7.90876	5.46492	2.27885	1.95562e-05
LRRC24	ENSG00000254402	8.66682	6.5631	1.99499	2.01035e-05
NDUFV1	ENSG00000167792	11.1497	9.8281	1.31536	2.01745e-05
GABBR2	ENSG00000136928	8.22722	5.86818	2.18804	2.12421e-05
ADAM15	ENSG00000143537	12.8367	10.6712	2.03097	2.12573e-05
CYFIP2	ENSG00000055163	9.41229	7.74419	1.60814	2.13612e-05
HDAC10	ENSG00000100429	8.31815	6.19076	2.01961	2.17222e-05
ZNF219	ENSG00000165804	10.4386	8.05455	2.21453	2.26151e-05
TSPAN4	ENSG00000214063	9.44012	7.0102	2.25485	2.29271e-05
SPHK1	ENSG00000176170	8.43905	5.76191	2.46922	2.29435e-05
ANKRD9	ENSG00000156381	10.7824	8.86311	1.83281	2.29929e-05
NPAS1	ENSG00000130751	8.99387	5.62356	2.93993	2.33835e-05
RAD9A	ENSG00000172613	10.9392	9.59616	1.32485	2.35459e-05
PEX10	ENSG00000157911	10.2403	8.82405	1.37938	2.35519e-05
CTB-50L17.8	ENSG00000280239	8.7422	4.99054	3.16905	2.44886e-05
SMUG1	ENSG00000123415	11.0763	9.80592	1.2647	2.50606e-05
ASB6	ENSG00000148331	10.4049	9.16738	1.22227	2.54535e-05
GATS	ENSG00000239521	9.19954	7.78942	1.384	2.59879e-05
ZNF653	ENSG00000161914	9.17076	6.92535	2.12627	2.60883e-05
PEMT	ENSG00000133027	9.99545	8.0339	1.91551	2.64987e-05
IFRD2	ENSG00000214706	10.6197	9.16972	1.41474	2.66264e-05
CYP2R1	ENSG00000186104	9.83585	8.02224	1.78046	2.76372e-05
MMP15	ENSG00000102996	10.7531	8.39475	2.19345	2.8435e-05
CNPY3	ENSG00000137161	10.9374	9.78802	1.13253	2.90424e-05
LMF2	ENSG00000100258	10.3809	9.26751	1.0929	2.96467e-05
RAB3IL1	ENSG00000167994	8.67021	6.35007	2.19242	3.0544e-05
PCSK7	ENSG00000160613	9.53112	8.02359	1.46435	3.09574e-05
ANKHD1	ENSG00000131503	9.20502	7.92319	1.25562	3.13726e-05
PSMD13	ENSG00000185627	11.6918	10.3778	1.28489	3.14547e-05
RARA	ENSG00000131759	11.4577	9.93901	1.47063	3.14549e-05
TBX2-AS1	ENSG00000267280	11.3701	9.58896	1.70974	3.16541e-05
TCIRG1	ENSG00000110719	9.76007	8.63915	1.10106	3.25763e-05
DGAT1	ENSG00000185000	10.4733	8.35734	2.02991	3.30263e-05
XRCC1	ENSG00000073050	11.2064	9.27176	1.86246	3.41984e-05
TRMU	ENSG00000100416	9.79207	8.49742	1.26426	3.49445e-05
FCHSD1	ENSG00000197948	10.1151	8.68562	1.40791	3.5558e-05
ATF6B	ENSG00000213676	11.1279	9.85618	1.24277	3.5558e-05
LRRC69	ENSG00000214954	6.67483	2.42339	3.43851	3.5734e-05
CTD-2319I12.2	ENSG00000267416	9.00878	5.04807	3.24731	3.72457e-05
CCDC92	ENSG00000119242	10.6228	9.52129	1.08413	4.02561e-05
EIF3K	ENSG00000178982	10.6367	9.20974	1.40513	4.04307e-05
GPRC5C	ENSG00000170412	9.81277	7.75406	1.96232	4.08053e-05
PYGB	ENSG00000100994	11.4787	10.0262	1.42504	4.08788e-05
THAP3	ENSG00000041988	9.71878	7.61736	1.98434	4.14759e-05
ZNF827	ENSG00000151612	7.53893	4.69324	2.53945	4.432e-05
ADM2	ENSG00000128165	9.67335	6.97852	2.45438	4.44635e-05
LINC00963	ENSG00000204054	11.2421	9.6609	1.53741	4.507e-05
FSD1	ENSG00000105255	10.6364	8.45082	2.13659	4.50753e-05
CD320	ENSG00000167775	9.53817	7.64774	1.80155	4.51951e-05
OPTN	ENSG00000123240	8.67158	6.7708	1.83666	4.52188e-05
PMVK	ENSG00000163344	10.8071	8.77545	1.94946	4.7235e-05
ETNK2	ENSG00000143845	10.4346	8.87704	1.51512	4.87128e-05
TUBGCP6	ENSG00000128159	10.5612	9.01412	1.49564	4.90575e-05
PPP2R3B	ENSG00000167393	10.1576	8.76005	1.35994	4.90856e-05
LRRC29	ENSG00000125122	8.52703	5.25328	2.8562	5.02591e-05
SULT1A1	ENSG00000196502	9.01719	6.70086	2.18445	5.22703e-05
WDR62	ENSG00000075702	9.88844	8.36886	1.48622	5.2961e-05
LTBP4	ENSG00000090006	10.8112	9.3625	1.43412	5.29754e-05
BEGAIN	ENSG00000183092	8.4063	5.25924	2.77223	5.36678e-05
MED25	ENSG00000104973	10.5099	8.5905	1.81981	5.38465e-05
SSNA1	ENSG00000176101	12.2021	10.6445	1.5041	5.7106e-05
CMBL	ENSG00000164237	10.7442	9.41371	1.29632	5.72535e-05
ARMC9	ENSG00000135931	9.46586	7.92504	1.49189	5.84187e-05
RPL12P21	ENSG00000242683	6.53472	1.91545	3.5688	5.98481e-05
GPX4	ENSG00000167468	12.8307	11.5954	1.20911	6.07455e-05
NRSN2	ENSG00000125841	10.2987	8.91356	1.35373	6.29054e-05
UNC13D	ENSG00000092929	10.3242	8.59087	1.65663	6.45082e-05
RN7SL832P	ENSG00000243819	8.086	4.46755	3.06557	6.51666e-05
INO80B	ENSG00000115274	8.7871	6.38545	2.28785	6.57251e-05
RPS6KL1	ENSG00000198208	9.4432	6.59795	2.57363	6.59886e-05
PRMT2	ENSG00000160310	11.1115	9.73739	1.32843	6.70081e-05
AGAP2	ENSG00000135439	8.40063	6.32399	1.95338	6.71709e-05
TRIM41	ENSG00000146063	10.2326	9.09024	1.12133	6.80761e-05
CENPM	ENSG00000100162	9.58446	8.32394	1.23247	7.33519e-05
HEXDC	ENSG00000169660	10.1016	8.40896	1.65651	7.8788e-05
SERPINB6	ENSG00000124570	10.4946	8.80453	1.65083	7.98367e-05
POLA2	ENSG00000014138	9.76541	8.52498	1.21528	8.17818e-05
DENND2C	ENSG00000175984	7.71813	5.88908	1.75276	8.21944e-05
LETM1	ENSG00000168924	9.97378	8.83274	1.12315	8.21944e-05
AP2S1	ENSG00000042753	11.1112	9.91147	1.17673	8.2437e-05
ACTN4	ENSG00000130402	13.9303	12.6378	1.25918	8.25388e-05
TANGO2	ENSG00000183597	9.31796	7.65129	1.60823	8.26741e-05
VPS28	ENSG00000160948	11.911	10.8333	1.05862	8.26741e-05
CCM2L	ENSG00000101331	9.32344	6.41644	2.69011	8.41852e-05
RP11-416N2.4	ENSG00000273108	6.87767	2.95538	3.30643	8.52108e-05
PPP2R5D	ENSG00000112640	10.1075	8.7061	1.36994	8.70249e-05
RNU6-549P	ENSG00000207162	7.46477	3.06394	3.48885	8.70299e-05
TIGD1	ENSG00000221944	9.04611	7.27521	1.7179	8.79871e-05
SCRN2	ENSG00000141295	10.248	8.90531	1.30428	8.82597e-05
ZMAT5	ENSG00000100319	10.5957	9.17137	1.3924	8.88697e-05
STX4	ENSG00000103496	10.5714	9.51799	1.03302	8.92919e-05
GPC2	ENSG00000213420	9.11619	6.86692	2.13706	8.9308e-05
GLB1L2	ENSG00000149328	9.12851	6.73758	2.21169	9.16874e-05
LRRC14	ENSG00000160959	9.49682	8.16156	1.30374	9.31915e-05
VAT1	ENSG00000108828	11.7989	10.2646	1.4966	9.45652e-05
DHX33	ENSG00000005100	9.45403	7.40538	1.96339	9.54465e-05
SKIV2L	ENSG00000204351	9.98331	8.44254	1.48648	9.65443e-05
TPRA1	ENSG00000163870	10.5146	9.09587	1.3764	9.77746e-05
RP11-666A20.4	ENSG00000248787	7.05916	2.71563	3.42764	9.7832e-05
NABP2	ENSG00000139579	9.96275	8.33458	1.57332	9.98425e-05
HYI	ENSG00000178922	10.4578	8.9386	1.49912	0.000102823
RHBDD3	ENSG00000100263	10.1813	7.93463	2.11337	0.000103178
C1QL1	ENSG00000131094	8.88786	6.649	2.1017	0.000103784
SCARB1	ENSG00000073060	11.5768	10.4266	1.15078	0.000104147
TMEM141	ENSG00000244187	11.3751	10.0828	1.25781	0.000105086
CCDC159	ENSG00000183401	9.812	8.05326	1.71196	0.000111882
PHLDB1	ENSG00000019144	10.1703	9.14512	1.00945	0.000113431
DENND1A	ENSG00000119522	9.47921	8.06237	1.37655	0.00012287
APOPT1	ENSG00000256053	10.8166	9.50237	1.28479	0.000123184
APEH	ENSG00000164062	9.1736	7.98568	1.16452	0.000130202
RP9	ENSG00000164610	11.4047	9.1893	2.04669	0.000131504
CARHSP1	ENSG00000153048	11.4804	10.2249	1.24952	0.000132691
SSU72	ENSG00000160075	11.9644	10.8909	1.07216	0.000132944
PLD3	ENSG00000105223	12.1056	10.2915	1.72204	0.000134847
RAB3B	ENSG00000169213	7.1841	3.14978	3.30565	0.000147904
ZNF768	ENSG00000169957	11.8764	10.2008	1.62165	0.000147906
EML3	ENSG00000149499	11.4513	9.81279	1.64237	0.000151376
DNM1	ENSG00000106976	10.2002	9.03812	1.14344	0.000151853
FTCD	ENSG00000160282	9.05728	7.37902	1.60909	0.000154075
IDH2	ENSG00000182054	12.7038	11.5384	1.14842	0.000154372
CHD3	ENSG00000170004	12.2747	10.7402	1.47573	0.000155334
MTMR12	ENSG00000150712	8.72745	7.08403	1.57	0.000157448
NKAIN1	ENSG00000084628	8.9565	6.61162	2.15603	0.000157551
BIN3	ENSG00000147439	9.86639	8.53627	1.2908	0.000157558
C19orf24	ENSG00000228300	9.89805	7.8145	1.95139	0.000157617
VGF	ENSG00000128564	9.78525	8.39019	1.35007	0.000159585
EPHB4	ENSG00000196411	10.6995	9.34554	1.31642	0.000160319
SMARCA4	ENSG00000127616	12.4228	11.319	1.10497	0.000160927
WFIKKN1	ENSG00000127578	7.29667	4.64266	2.44522	0.000162698
CTB-129O4.1	ENSG00000248367	8.8731	6.61629	2.12088	0.00016466
DCP1A	ENSG00000272886	10.1003	7.3025	2.46678	0.000167646
MISP3	ENSG00000141854	10.4624	9.166	1.28457	0.000168632
TBC1D17	ENSG00000104946	9.91882	8.54551	1.32744	0.000168676
FKBP11	ENSG00000134285	9.9331	7.53933	2.1854	0.000173191
CYB561A3	ENSG00000162144	9.95211	8.23283	1.66829	0.000175331
MON1B	ENSG00000103111	11.043	9.38977	1.58983	0.000175963
DUSP15	ENSG00000149599	7.83124	4.55226	2.78949	0.000176041
SMIM12	ENSG00000163866	9.33474	7.54497	1.69736	0.000181409
BTN3A2	ENSG00000186470	6.82246	2.79108	3.25921	0.000184576
PCBP3	ENSG00000183570	9.09589	6.61461	2.3297	0.000188109
GTF2I	ENSG00000263001	9.15321	6.88514	2.10961	0.000191315
PKP3	ENSG00000184363	11.3886	9.5555	1.7363	0.000195699
GON4L	ENSG00000116580	9.23362	7.78817	1.41381	0.000195797
ANO10	ENSG00000160746	9.79344	8.03657	1.66258	0.00019833
LRRC3	ENSG00000160233	8.44098	5.47566	2.74172	0.00019914
LINC01547	ENSG00000183250	7.96239	5.93098	1.89723	0.000201786
RP11-706O15.1	ENSG00000205664	9.25831	8.08751	1.14727	0.000202075
PLXNB1	ENSG00000164050	12.1258	10.7791	1.3313	0.000204199
CAPN10	ENSG00000142330	9.53437	8.0301	1.46584	0.000208284
ZNF408	ENSG00000175213	9.50016	7.68542	1.75863	0.000212825
CXXC5	ENSG00000171604	12.8424	11.8123	1.03729	0.000215991
COASY	ENSG00000068120	10.6959	9.24978	1.40019	0.000216258
RNF224	ENSG00000233198	7.45368	4.06381	2.91875	0.000219041
AL589743.1	ENSG00000279508	6.83085	3.18809	3.0717	0.000220229
TK1	ENSG00000167900	11.7256	10.244	1.42069	0.000221956
BATF	ENSG00000156127	9.44914	8.19286	1.22721	0.00022196
RP11-849F2.9	ENSG00000269947	7.63632	4.30426	2.802	0.000224421
MOCS1	ENSG00000124615	8.08394	6.17103	1.83237	0.000225168
SNORA77	ENSG00000221083	7.12879	3.89876	2.74253	0.000230777
SYCE1L	ENSG00000205078	9.33547	6.8838	2.30352	0.000231308
PEX14	ENSG00000142655	9.28614	7.59521	1.63482	0.000231543
NUDCD3	ENSG00000015676	11.0216	9.49233	1.46912	0.000235857
FOXP4	ENSG00000137166	10.8781	9.41238	1.42925	0.000244339
RP11-316O14.1	ENSG00000268603	7.60233	3.95681	3.08491	0.000246389
ZNF526	ENSG00000167625	8.21533	5.80641	2.18752	0.000246518
ZNF467	ENSG00000181444	10.8959	9.55792	1.3104	0.000247378
SMG9	ENSG00000105771	10.6301	9.11578	1.49694	0.000249414
PPP1R27	ENSG00000182676	5.95429	2.08575	3.17973	0.00024997
CTD-2013N17.6	ENSG00000280332	6.79208	2.27458	3.33935	0.000252916
URM1	ENSG00000167118	10.7632	9.33935	1.37467	0.000258929
RPS23P6	ENSG00000241641	7.3395	4.30816	2.62848	0.000280005
VIPR2	ENSG00000106018	8.41746	6.21889	2.03949	0.000280407
EEFSEC	ENSG00000132394	9.80956	7.73458	1.93877	0.000281264
MED19	ENSG00000156603	8.75747	6.2901	2.26715	0.000283546
GPI	ENSG00000105220	11.3506	10.2638	1.0824	0.000283574
B9D1	ENSG00000108641	8.78299	7.09687	1.63689	0.000288364
C1QL4	ENSG00000186897	10.3404	8.06001	2.08656	0.000291708
DCST2	ENSG00000163354	9.10079	7.06877	1.95552	0.000292044
TRAF7	ENSG00000131653	12.2556	11.0012	1.22119	0.000292044
BCR	ENSG00000186716	9.30959	7.82289	1.46081	0.000294933
FAM213B	ENSG00000157870	9.81686	8.31577	1.47706	0.000295226
RP11-430B1.1	ENSG00000259398	6.97953	2.7297	3.07886	0.00030086
MAP1S	ENSG00000130479	9.38277	7.3201	2.007	0.00030086
ZGLP1	ENSG00000220201	8.2648	6.233	1.90814	0.000301686
KSR2	ENSG00000171435	8.82104	6.5493	2.12077	0.000306093
AC005306.3	ENSG00000267283	8.38977	6.25062	2.02331	0.000306093
SLC10A3	ENSG00000126903	10.6077	9.40915	1.18375	0.00030762
RN7SL587P	ENSG00000240233	6.47919	1.9682	3.49709	0.000313437
FAAP20	ENSG00000162585	11.28	8.85214	2.18837	0.000321708
CTD-2020K17.4	ENSG00000233483	7.293	3.68288	3.06962	0.000321961
NUDT8	ENSG00000167799	9.00643	6.82283	2.0464	0.000323394
TMED1	ENSG00000099203	11.1344	9.3166	1.71518	0.000325937
VAX2	ENSG00000116035	7.79681	5.23822	2.36122	0.000329631
VPS9D1-AS1	ENSG00000261373	9.25601	7.81132	1.40072	0.000331993
ERBB2	ENSG00000141736	11.9089	9.93653	1.83907	0.000337696
PLCD3	ENSG00000161714	10.9891	9.29227	1.64593	0.000341223
SHARPIN	ENSG00000179526	11.1683	9.94371	1.19369	0.000341243
ATP6AP1	ENSG00000071553	12.0198	10.2665	1.65997	0.00034173
PML	ENSG00000140464	10.0373	8.59017	1.39364	0.000348772
CITED4	ENSG00000179862	10.5753	8.36674	2.02105	0.00034929
SEMA6C	ENSG00000143434	9.94144	8.12942	1.71711	0.000357736
WEE2-AS1	ENSG00000228775	8.10897	5.56019	2.35093	0.000368124
GADD45G	ENSG00000130222	9.88262	8.43399	1.42606	0.000368563
RNF150	ENSG00000170153	8.3792	6.35086	1.89036	0.000372793
RP11-66B24.7	ENSG00000272808	9.15881	6.93128	2.12167	0.000374429
KCNIP3	ENSG00000115041	8.39846	5.62023	2.44892	0.000375052
CCDC142	ENSG00000135637	8.08185	5.18884	2.50869	0.000378478
FAM173A	ENSG00000103254	11.0402	8.94953	1.93086	0.000383359
KNDC1	ENSG00000171798	10.8212	8.94962	1.76063	0.00038597
RP11-307P22.1	ENSG00000258445	7.0794	1.30192	3.60017	0.000386709
RTN2	ENSG00000125744	10.0041	7.43905	2.34614	0.000391501
KCNF1	ENSG00000162975	9.32805	6.62371	2.43253	0.000398346
FAM83G	ENSG00000188522	9.42563	7.7835	1.56333	0.000398828
RBMX2	ENSG00000134597	11.9038	10.5127	1.34258	0.000398828
MAP3K14	ENSG00000006062	9.35389	7.54175	1.74794	0.000401049
CHMP6	ENSG00000176108	9.10409	6.77657	2.15439	0.000403671
STAT6	ENSG00000166888	9.26848	7.47298	1.76712	0.000403737
BRMS1	ENSG00000174744	11.1698	9.70144	1.43798	0.000414859
TMEM129	ENSG00000168936	10.5602	8.80616	1.69953	0.000415658
TMEM63A	ENSG00000196187	9.196	7.6491	1.4802	0.000417184
C1orf228	ENSG00000198520	8.75461	6.80583	1.88779	0.000425011
FZR1	ENSG00000105325	9.60365	7.66556	1.84559	0.000428329
NDUFB2	ENSG00000090266	11.4339	10.3516	1.06822	0.000428407
RHOBTB2	ENSG00000008853	9.50021	7.34708	1.97911	0.000429256
FCHO1	ENSG00000130475	9.19194	7.33411	1.75244	0.00043042
SIRT6	ENSG00000077463	10.6493	9.44091	1.17365	0.000433093
ZBTB7B	ENSG00000160685	10.3929	8.7126	1.6357	0.000439896
CBFA2T3	ENSG00000129993	9.61366	8.37327	1.21894	0.000453354
C19orf52	ENSG00000142444	9.78927	8.51942	1.24214	0.000464577
CCDC149	ENSG00000181982	9.33884	7.37475	1.85187	0.000469442
UBE2M	ENSG00000130725	10.4288	9.37164	1.03936	0.000469442
SLC12A7	ENSG00000113504	9.44432	8.26544	1.15037	0.000470207
ATP2A1-AS1	ENSG00000260442	9.37508	6.8893	2.23881	0.00047988
SLC16A3	ENSG00000141526	9.50258	7.9599	1.48762	0.000498829
RP11-54O7.2	ENSG00000241180	6.86158	1.86975	3.31933	0.000504404
ANKS3	ENSG00000168096	10.4543	9.34588	1.07952	0.000510129
PPP5C	ENSG00000011485	10.5031	8.95554	1.5057	0.000512603
INAFM1	ENSG00000257704	9.30977	7.96255	1.30173	0.000522362
EHD1	ENSG00000110047	10.6251	9.07711	1.48734	0.000523919
MAP3K6	ENSG00000142733	9.66731	8.5427	1.10882	0.000526427
CAMK2G	ENSG00000148660	9.155	7.65827	1.43523	0.000532492
POU5F1P6	ENSG00000242551	6.26191	0	3.56952	0.000534511
GOLT1A	ENSG00000174567	9.49243	8.20733	1.25031	0.000534511
VPS37B	ENSG00000139722	10.2359	8.62432	1.54374	0.000542557
ASCL2	ENSG00000183734	10.1851	8.38837	1.69626	0.000544117
ENTPD8	ENSG00000188833	7.63773	5.64545	1.86963	0.000554219
STUB1	ENSG00000103266	11.5918	9.88424	1.64707	0.000557185
RNU1-67P	ENSG00000207175	7.28716	3.76312	2.9209	0.000565613
LINC00638	ENSG00000258701	7.45452	3.98926	2.89889	0.000565613
OGFOD3	ENSG00000181396	9.17988	8.14251	1.01519	0.000570689
SREBF1	ENSG00000072310	12.2829	11.223	1.06187	0.000571545
GCN1	ENSG00000089154	10.6174	9.52956	1.07686	0.000595774
CYB561D1	ENSG00000174151	9.2297	8.10873	1.09874	0.000603092
RGS11	ENSG00000076344	9.22644	6.90857	2.14776	0.000606283
KCNJ11	ENSG00000187486	8.59045	5.54983	2.68801	0.000607291
PER1	ENSG00000179094	10.1114	8.55169	1.51182	0.000615319
OPA3	ENSG00000125741	8.77056	7.13078	1.57996	0.000620208
MRPL4	ENSG00000105364	10.747	9.57432	1.14965	0.000626851
MAP7D1	ENSG00000116871	9.57249	7.97249	1.5753	0.000628057
DOK7	ENSG00000175920	10.1498	8.95711	1.16182	0.00063072
NTHL1	ENSG00000065057	9.16375	7.2697	1.79955	0.000657427
HEXA	ENSG00000213614	11.04	9.84864	1.16584	0.000660988
TSC22D4	ENSG00000166925	10.6509	9.41693	1.21676	0.000666725
NTMT1	ENSG00000148335	9.89156	8.18268	1.60821	0.000678001
CTD-3184A7.4	ENSG00000232442	10.3002	9.12436	1.16309	0.000679583
POLR2L	ENSG00000177700	10.3163	8.42881	1.83919	0.000679935
CCDC170	ENSG00000120262	10.9234	8.96566	1.81664	0.000680075
SLC12A9	ENSG00000146828	10.8655	9.75411	1.09783	0.000681089
B3GALT6	ENSG00000176022	9.27799	7.94148	1.3086	0.000690418
KRT81	ENSG00000205426	9.87532	8.13631	1.69427	0.000710082
KIAA0319L	ENSG00000142687	10.3517	8.40717	1.8811	0.000722459
LYPLA2	ENSG00000011009	10.4674	9.36002	1.08974	0.000724138
SOX12	ENSG00000177732	10.6305	9.16075	1.40692	0.000730656
GIPC1	ENSG00000123159	12.6707	11.4392	1.21362	0.000730656
CLIP1	ENSG00000130779	9.76519	8.48193	1.25364	0.00073737
RUVBL2	ENSG00000183207	11.7547	10.1528	1.54238	0.000741694
MED22	ENSG00000148297	9.09288	7.69375	1.35974	0.000743991
NAGLU	ENSG00000108784	9.42099	8.12713	1.25907	0.000749672
SLC45A1	ENSG00000162426	7.31176	3.52592	2.96132	0.000759622
RAB4B	ENSG00000167578	9.80015	8.47802	1.29705	0.0007628
RBM23	ENSG00000100461	9.86121	7.98729	1.76357	0.000766444
FAM171A2	ENSG00000161682	9.79312	6.91484	2.45075	0.000770873
C6orf106	ENSG00000196821	11.1677	10.0085	1.15491	0.000777957
PRR22	ENSG00000212123	8.46631	6.39786	1.97607	0.000789104
PQLC2	ENSG00000040487	9.55653	7.82992	1.64605	0.000791507
MRTO4	ENSG00000053372	10.7291	9.10412	1.54581	0.000807271
DMTN	ENSG00000158856	9.5673	7.38015	2.06834	0.000815779
CRTC1	ENSG00000105662	10.4685	8.30141	2.02666	0.000815779
CACFD1	ENSG00000160325	9.75723	7.59286	1.98724	0.000822276
SMG1P1	ENSG00000237296	6.56031	2.6555	3.04314	0.000841872
CD99L2	ENSG00000102181	9.28896	8.25131	1.01415	0.000861471
RP11-638I2.4	ENSG00000258982	7.65571	4.45034	2.68213	0.000867292
VPS18	ENSG00000104142	8.58971	6.46493	2.00914	0.000867292
RP11-111M22.3	ENSG00000255135	9.86496	8.48994	1.35093	0.000867292
ARHGAP44	ENSG00000006740	9.16197	7.61528	1.47581	0.000876177
CHMP2A	ENSG00000130724	11.8315	10.6875	1.12036	0.000880614
CCDC57	ENSG00000176155	11.1715	9.5833	1.50333	0.000889048
SLC27A1	ENSG00000130304	9.20781	7.41949	1.6826	0.000890945
UNC93B1	ENSG00000110057	10.3646	8.74761	1.52979	0.000896025
ROGDI	ENSG00000067836	10.8833	9.51355	1.33448	0.000899009
P2RX2	ENSG00000187848	10.7821	9.67657	1.10359	0.000900978
RP11-367H1.1	ENSG00000273113	8.68259	6.47442	2.10201	0.00090126
SPTY2D1-AS1	ENSG00000247595	7.98482	6.14535	1.71839	0.000904212
LZTR1	ENSG00000099949	10.3168	8.66471	1.5948	0.000905506
HIST1H1E	ENSG00000168298	6.2691	3.89629	2.15027	0.000907421
LPO	ENSG00000167419	6.11846	0.341805	3.44053	0.000908116
SLC19A1	ENSG00000173638	11.0673	8.7568	2.1008	0.000912731
ST6GALNAC6	ENSG00000160408	10.0066	8.10263	1.87428	0.000915804
NCKAP5L	ENSG00000167566	9.87624	8.23602	1.554	0.000916348
TNFAIP2	ENSG00000185215	8.27516	6.82952	1.39793	0.000916348
ERCC2	ENSG00000104884	10.4856	8.58605	1.80755	0.000920287
MAP6D1	ENSG00000180834	9.29754	7.85686	1.41366	0.000920287
NDOR1	ENSG00000188566	9.15433	7.59794	1.52917	0.000922795
COLGALT1	ENSG00000130309	10.692	9.08649	1.54746	0.000937433
SERGEF	ENSG00000129158	8.88727	7.4938	1.34341	0.000937997
WFS1	ENSG00000109501	10.6193	8.6086	1.86965	0.000965914
CATSPERG	ENSG00000099338	9.16298	7.83276	1.3045	0.00096752
DAPK3	ENSG00000167657	10.0078	7.88489	1.93881	0.000977876
PPP1R16A	ENSG00000160972	11.1968	9.97077	1.19588	0.000981522
KXD1	ENSG00000105700	12.4891	11.052	1.39045	0.000993114
ANKRD23	ENSG00000163126	8.72861	6.85063	1.76427	0.000999151
CCER2	ENSG00000262484	8.07131	5.95334	1.9455	0.00100167
VWA5B2	ENSG00000145198	8.06023	5.06898	2.5309	0.00101322
TRIM27	ENSG00000204713	9.53976	8.49528	1.02172	0.00102653
PRMT7	ENSG00000132600	9.97503	8.41677	1.48255	0.0010588
SNORA73B	ENSG00000200087	5.67665	0.671047	3.3942	0.00106913
NRBP1	ENSG00000115216	11.5282	10.068	1.44672	0.00106913
ZNF48	ENSG00000180035	9.29436	7.99836	1.24869	0.00108071
JMJD4	ENSG00000081692	9.37633	7.63253	1.64661	0.0011388
GRWD1	ENSG00000105447	10.3505	7.92012	2.16313	0.00114202
SPRYD3	ENSG00000167778	10.0421	8.38658	1.601	0.00116472
RASSF7	ENSG00000099849	10.6877	8.69502	1.83352	0.00119368
HDAC11	ENSG00000163517	11.1346	9.30091	1.75977	0.0012068
B3GAT3	ENSG00000149541	11.2143	9.71345	1.43858	0.00120776
FAM229A	ENSG00000225828	7.66414	6.0505	1.53654	0.00122003
PPP1R37	ENSG00000104866	10.5751	9.08701	1.42141	0.00123553
INSR	ENSG00000171105	10.5021	9.39498	1.08319	0.00124925
FAM83H	ENSG00000180921	12.2127	10.9018	1.27324	0.00125619
NOVA1	ENSG00000139910	8.7773	6.98277	1.69155	0.00127091
MORC2	ENSG00000133422	11.3917	10.2888	1.08411	0.00132338
ETV4	ENSG00000175832	8.83945	7.28393	1.50741	0.00132942
ZNF787	ENSG00000142409	10.2504	8.32811	1.78317	0.00139337
ITGA5	ENSG00000161638	8.63058	6.6941	1.84867	0.00141854
GDPD5	ENSG00000158555	9.22897	6.48335	2.35322	0.00144611
IRF7	ENSG00000185507	9.24743	7.87677	1.3144	0.00144948
CEP164	ENSG00000110274	9.88939	8.66145	1.20806	0.00145145
SNAP47	ENSG00000143740	10.0384	8.31916	1.62365	0.00146977
AP000437.3	ENSG00000279549	7.56282	3.52304	2.92676	0.00148185
POLRMT	ENSG00000099821	10.5712	8.9747	1.55722	0.00148251
ICAM3	ENSG00000076662	9.56674	7.58677	1.8182	0.00151694
TMEM8A	ENSG00000129925	11.1169	9.81178	1.27332	0.00152338
PRPF31	ENSG00000105618	11.6482	10.3369	1.26313	0.00152807
CERS4	ENSG00000090661	10.0967	8.3767	1.60877	0.00152861
PSMD3	ENSG00000108344	10.6509	9.49059	1.15705	0.00154205
COMTD1	ENSG00000165644	8.80327	7.72194	1.05606	0.00156353
AC004754.3	ENSG00000269881	7.05246	4.03346	2.52245	0.00156777
MRPS7	ENSG00000125445	10.5415	9.01825	1.52236	0.00159271
XAB2	ENSG00000076924	10.5774	8.95808	1.59368	0.00160588
NUBP2	ENSG00000095906	10.8888	9.30407	1.49973	0.00163188
LL21NC02-1C16.1	ENSG00000273027	8.03328	6.18114	1.73061	0.00163513
VMO1	ENSG00000182853	7.98896	5.65656	2.08	0.0016445
HSD3B7	ENSG00000099377	9.9035	8.45242	1.41962	0.0016742
RAMP3	ENSG00000122679	11.2219	10.0407	1.14019	0.00167834
PSMD1	ENSG00000173692	8.69369	7.33933	1.30387	0.00167968
DNHD1	ENSG00000179532	7.83563	5.22302	2.30575	0.00167987
PTRH1	ENSG00000187024	8.78147	5.43969	2.70819	0.00169678
FLNB	ENSG00000136068	11.4872	10.272	1.1811	0.00170574
FBL	ENSG00000105202	12.2558	11.225	1.01183	0.0017306
ARFGAP2	ENSG00000149182	11.4056	10.1452	1.2183	0.00173684
GPRIN1	ENSG00000169258	8.5549	7.19607	1.30823	0.0017402
CAPN5	ENSG00000149260	9.4952	7.91694	1.52527	0.0017402
YDJC	ENSG00000161179	11.3561	9.7998	1.47465	0.0017402
REEP2	ENSG00000132563	8.68617	5.75218	2.4529	0.00179809
P3H3	ENSG00000110811	9.30789	6.78561	2.29716	0.00181337
COQ4	ENSG00000167113	11.6836	10.3663	1.27882	0.00181337
TMEM234	ENSG00000160055	8.48354	7.16977	1.26385	0.00182211
LINC00173	ENSG00000196668	7.89757	6.23454	1.5766	0.001855
ABTB1	ENSG00000114626	9.71631	7.88751	1.69479	0.00190558
ADA	ENSG00000196839	7.73317	6.01213	1.61953	0.00190975
RHOG	ENSG00000177105	9.14305	7.44441	1.64063	0.00193022
MZF1	ENSG00000099326	10.4045	9.37735	1.00856	0.00193261
AMDHD2	ENSG00000162066	9.92008	8.21025	1.68924	0.00193986
GAPDHP76	ENSG00000249840	5.67143	1.33477	2.99718	0.00200011
ZDHHC18	ENSG00000204160	10.3538	9.24551	1.0712	0.00202118
RP11-439E19.7	ENSG00000235021	6.64608	3.22721	2.77517	0.00202487
MFSD3	ENSG00000167700	8.3153	6.97143	1.2913	0.0020331
ARHGAP39	ENSG00000147799	9.62987	8.15695	1.43088	0.00206356
NRM	ENSG00000137404	11.5665	9.7935	1.72708	0.00208034
TRIB3	ENSG00000101255	11.3125	10.066	1.22972	0.00209384
RP11-417L19.2	ENSG00000256955	8.14614	5.06665	2.58427	0.00209861
NAT10	ENSG00000135372	10.185	9.00489	1.14756	0.00209969
SELO	ENSG00000073169	9.43596	8.37702	1.038	0.00210548
MED12	ENSG00000184634	9.96272	8.63864	1.29447	0.00214873
SESN2	ENSG00000130766	9.94825	8.36579	1.55904	0.00215478
BRD9	ENSG00000028310	10.341	9.23541	1.08017	0.00220927
CLUHP3	ENSG00000131797	8.47103	7.21723	1.21595	0.00224331
RP11-247A12.2	ENSG00000204055	7.80517	4.44996	2.68048	0.00225555
ANKRD13B	ENSG00000198720	8.95894	7.41514	1.49243	0.00225716
SNHG18	ENSG00000250786	8.36202	6.52646	1.71508	0.00227777
MCRIP2P1	ENSG00000241418	6.69471	3.26302	2.65424	0.00230811
HOXA11-AS	ENSG00000240990	7.9382	5.37102	2.27794	0.00230811
ZDHHC8	ENSG00000099904	9.29565	7.8866	1.38217	0.00232655
RP3-405J10.2	ENSG00000257531	6.24132	2.29284	2.82131	0.0023858
TSPAN33	ENSG00000158457	8.40819	7.06855	1.29686	0.00238853
ALKBH4	ENSG00000160993	9.48739	8.31178	1.13168	0.00239363
RNF40	ENSG00000103549	11.4871	10.4604	1.00283	0.0024054
STX18	ENSG00000168818	9.02947	7.95153	1.05864	0.00240958
TRAPPC6A	ENSG00000007255	10.5757	9.37993	1.19322	0.00241906
A4GALT	ENSG00000128274	9.28292	7.70865	1.48893	0.00245573
PNKP	ENSG00000039650	10.1949	8.76688	1.41613	0.00251739
CCDC127	ENSG00000164366	9.64983	8.51238	1.12639	0.00257192
TTLL12	ENSG00000100304	9.36603	7.5594	1.73212	0.00257272
DUS3L	ENSG00000141994	9.1661	7.6557	1.43045	0.00259
TMEM208	ENSG00000168701	11.294	9.92052	1.3345	0.00259409
QSOX1	ENSG00000116260	10.8301	9.58902	1.20465	0.0026076
ISG15	ENSG00000187608	10.4773	8.41935	1.87332	0.00261226
NLGN2	ENSG00000169992	10.2451	9.22263	1.0115	0.00261841
PELI3	ENSG00000174516	7.97498	5.93173	1.90361	0.00265617
H1FX-AS1	ENSG00000206417	8.56348	6.92066	1.58434	0.00266507
NFATC4	ENSG00000100968	9.50843	8.19681	1.29535	0.00268322
ABCB9	ENSG00000150967	8.83479	6.77216	1.94748	0.00268728
IPO13	ENSG00000117408	9.81952	8.11553	1.60197	0.00269104
GLMP	ENSG00000198715	9.62741	8.33591	1.25811	0.00270722
MXD4	ENSG00000123933	11.5523	9.05757	2.16245	0.00272181
DEAF1	ENSG00000177030	9.71141	8.40522	1.27221	0.00281256
ANKZF1	ENSG00000163516	9.41019	8.22036	1.17284	0.0028297
RP11-417L19.5	ENSG00000279283	6.89735	1.52445	3.01121	0.00287386
EGLN2	ENSG00000269858	9.20475	6.50143	2.32124	0.00288002
IRAK1	ENSG00000184216	10.5089	9.3964	1.09657	0.00289307
P2RX4	ENSG00000135124	9.76031	8.07405	1.6436	0.00290761
ZNF417	ENSG00000173480	7.61222	5.58276	1.84343	0.00291718
P3H1	ENSG00000117385	9.22654	7.87535	1.29265	0.00292989
SH3BP5L	ENSG00000175137	9.91808	7.74626	1.93655	0.00295436
CACNB3	ENSG00000167535	11.27	9.90094	1.30794	0.00295436
ANKRD24	ENSG00000089847	9.14945	7.05252	1.90565	0.00304666
ACAD10	ENSG00000111271	10.5026	8.72216	1.64425	0.00307599
DDX11	ENSG00000013573	9.98238	8.75093	1.22382	0.0030828
APOE	ENSG00000130203	7.36882	4.48916	2.51924	0.00312384
PTK7	ENSG00000112655	9.83123	8.69351	1.10735	0.00319529
THOP1	ENSG00000172009	10.326	8.27765	1.84507	0.00322132
SUN2	ENSG00000100242	8.98218	7.51758	1.39218	0.00324717
EVPL	ENSG00000167880	11.833	10.6377	1.1716	0.0032658
DNPEP	ENSG00000123992	11.372	10.2924	1.0494	0.00327275
RP11-49O14.2	ENSG00000236095	6.36696	2.74059	2.82473	0.00328282
PRR7	ENSG00000131188	10.4974	9.01059	1.40636	0.00329353
PTCD1	ENSG00000106246	9.4071	7.81544	1.55117	0.0033065
RPTOR	ENSG00000141564	9.39462	7.75857	1.56339	0.00336693
KLHL22	ENSG00000099910	8.89968	6.88978	1.8292	0.00345746
TMEM115	ENSG00000126062	10.4699	8.67169	1.65952	0.00345746
HIST1H1D	ENSG00000124575	6.96707	3.02501	2.79943	0.00351853
SIPA1	ENSG00000213445	10.6039	8.63724	1.78286	0.00354023
TMC4	ENSG00000167608	10.9002	9.75649	1.1208	0.00356134
NAA38	ENSG00000183011	10.2267	9.08107	1.11351	0.00356134
PRICKLE3	ENSG00000012211	8.68442	6.65393	1.94932	0.00361155
RNF181	ENSG00000168894	10.9773	9.9476	1.01944	0.00363047
EMC3-AS1	ENSG00000180385	8.82312	7.50369	1.2647	0.00363415
INPPL1	ENSG00000165458	12.7543	11.5269	1.17906	0.00363515
CCND3	ENSG00000112576	10.1953	8.90827	1.23906	0.00366455
FIS1	ENSG00000214253	10.9498	9.60742	1.29385	0.00366852
FAM124A	ENSG00000150510	6.61453	2.86987	2.66355	0.00369379
ITPKA	ENSG00000137825	8.19255	6.32273	1.77171	0.00369403
NACC1	ENSG00000160877	11.4435	10.2552	1.14708	0.00370166
ZFAND2B	ENSG00000158552	9.54919	8.40423	1.1296	0.0037033
CDK5RAP2	ENSG00000136861	10.049	8.77565	1.27142	0.00375068
KIAA2013	ENSG00000116685	9.90095	8.56067	1.28549	0.00375787
DUSP8	ENSG00000184545	8.62443	6.59838	1.86503	0.00377061
SPHK2	ENSG00000063176	8.76497	6.50981	2.01532	0.00377458
C19orf54	ENSG00000188493	9.65956	8.34193	1.26844	0.00386273
ZDHHC22	ENSG00000177108	8.61119	6.62035	1.87346	0.00387309
PICK1	ENSG00000100151	8.46952	7.19468	1.22601	0.0039831
XIAP	ENSG00000101966	11.8447	10.0898	1.61896	0.00400426
LINC01235	ENSG00000270547	6.38797	3.49425	2.44395	0.00401521
TMCC2	ENSG00000133069	6.6943	4.25228	2.15212	0.00403062
RP11-319G9.3	ENSG00000260816	9.57946	7.54853	1.82963	0.00403146
CALML6	ENSG00000169885	8.50823	6.18166	2.10331	0.00406496
LL21NC02-21A1.1	ENSG00000273796	7.8954	6.16507	1.61177	0.0040918
TMEM125	ENSG00000179178	8.33002	6.53741	1.65434	0.00409219
MIR125A	ENSG00000208008	4.5278	1.06765	2.66668	0.00409996
MUC16	ENSG00000181143	10.0237	7.81154	2.00804	0.00412955
TRIOBP	ENSG00000100106	10.4958	9.46654	1.01741	0.0041374
GABBR1	ENSG00000204681	8.97252	7.77473	1.15258	0.00415874
KB-68A7.1	ENSG00000274225	7.38697	5.09401	2.04661	0.0042455
TSR3	ENSG00000007520	9.75445	8.40746	1.28978	0.00426257
RND2	ENSG00000108830	7.71911	4.98158	2.28935	0.00428936
SPOUT1	ENSG00000198917	10.1222	9.07003	1.0292	0.00429262
SLC27A5	ENSG00000083807	9.27666	7.60849	1.60671	0.00430907
CLPB	ENSG00000162129	9.35631	7.34541	1.89276	0.00431816
AIFM2	ENSG00000042286	9.16164	7.72258	1.39094	0.00432704
CREB3	ENSG00000107175	9.76786	8.49105	1.24147	0.00433116
ATG9A	ENSG00000198925	10.2547	8.89607	1.30794	0.00436901
TMEM121	ENSG00000184986	8.18577	5.25292	2.39851	0.00450738
FXR2	ENSG00000129245	9.47777	8.33701	1.1145	0.00454461
RPL23AP32	ENSG00000237887	6.39891	2.91382	2.67634	0.00455775
TTLL5	ENSG00000119685	9.9099	8.66375	1.19687	0.00459546
NNT-AS1	ENSG00000248092	9.12709	7.17936	1.89061	0.00477669
FGFR4	ENSG00000160867	8.24371	6.83597	1.35866	0.00486182
NUPR1	ENSG00000176046	9.31912	6.97089	2.02925	0.00494815
MIR940	ENSG00000260778	6.9533	4.45763	2.16366	0.00494986
BDP1	ENSG00000145734	7.48175	6.01519	1.39592	0.0049575
C2CD4C	ENSG00000183186	8.6471	6.29961	2.04119	0.00498557
NR1H3	ENSG00000025434	8.51215	6.46147	1.96873	0.00508714
PANO1	ENSG00000274897	6.68049	4.26806	2.11203	0.00523357
BAIAP2L1	ENSG00000006453	10.5889	9.39312	1.16855	0.00524502
ZNF517	ENSG00000197363	8.59898	6.39846	2.02392	0.00528823
MARK2	ENSG00000072518	10.0284	8.83074	1.18611	0.00533834
SYNGAP1	ENSG00000197283	8.98893	7.72429	1.24142	0.0053838
CATIP	ENSG00000158428	6.64949	3.16819	2.70363	0.00546829
ZNF580	ENSG00000213015	10.1473	8.24724	1.72412	0.005483
RNF220	ENSG00000187147	10.5042	8.999	1.4149	0.0055666
CDPF1	ENSG00000205643	8.7358	7.20188	1.46924	0.00558939
TMEM214	ENSG00000119777	10.6678	9.46092	1.21706	0.00558939
EIF6	ENSG00000242372	9.96028	8.80681	1.1132	0.00564392
METTL16	ENSG00000127804	9.81504	8.63992	1.16781	0.0056508
VASH1	ENSG00000071246	9.43812	8.16934	1.2146	0.00565974
DGCR6	ENSG00000183628	7.83775	5.63787	1.97414	0.00566047
C1orf167	ENSG00000215910	5.74035	1.75219	2.89312	0.00568287
RP11-147L13.13	ENSG00000277476	10.3662	9.2453	1.11689	0.0057361
PPM1K	ENSG00000163644	9.06467	7.84958	1.17072	0.00578109
CHID1	ENSG00000177830	9.63555	8.06634	1.49283	0.00580015
SMTN	ENSG00000183963	9.88263	8.48751	1.3212	0.00581424
STMN3	ENSG00000197457	10.5938	9.34828	1.20904	0.00583221
CTU1	ENSG00000142544	8.15076	5.97078	2.00238	0.00587747
RELA	ENSG00000173039	11.186	9.86593	1.2629	0.00590479
STX5	ENSG00000162236	9.2822	8.0821	1.16424	0.00598548
SLC25A23	ENSG00000125648	9.44137	8.13133	1.25673	0.00621549
TPT1-AS1	ENSG00000170919	8.72635	6.33128	2.1097	0.00631532
TOM1	ENSG00000100284	8.9841	7.25895	1.6266	0.00633431
SNX21	ENSG00000124104	9.39632	7.32178	2.01218	0.0063755
RP11-229D13.3	ENSG00000280388	5.6475	1.44243	2.88712	0.00646193
ZBTB17	ENSG00000116809	9.7243	8.59234	1.09019	0.00647775
MPDU1	ENSG00000129255	10.853	9.54155	1.26724	0.0064942
ANAPC2	ENSG00000176248	10.3881	9.12767	1.23173	0.0065081
TNNI2	ENSG00000130598	9.05741	6.66897	2.02538	0.00654739
EBF4	ENSG00000088881	8.10068	6.05657	1.87055	0.00671698
ZNF142	ENSG00000115568	9.85404	8.23928	1.52704	0.00676865
RALBP1	ENSG00000017797	9.02798	7.99599	1.01346	0.0068481
EXOC7	ENSG00000182473	11.4906	10.15	1.27473	0.00694193
TMEM91	ENSG00000142046	9.10349	7.31088	1.64145	0.00707829
GPAA1	ENSG00000197858	11.2056	9.62517	1.47183	0.00713079
AC007969.5	ENSG00000233762	7.91166	5.61635	1.98448	0.00727149
FBXL15	ENSG00000107872	8.76171	7.4168	1.26795	0.00728529
DNAJC5	ENSG00000101152	10.7301	9.5409	1.14018	0.00731918
GMPPA	ENSG00000144591	9.71525	8.56616	1.10988	0.00739773
SLC46A1	ENSG00000076351	8.71301	6.62925	1.85086	0.00750134
KRT18P37	ENSG00000253943	6.59039	3.88433	2.25036	0.00754007
KCP	ENSG00000135253	5.97892	1.42203	2.85452	0.00768179
SLC35C2	ENSG00000080189	11.536	10.3644	1.12896	0.00774063
CHPF2	ENSG00000033100	9.81792	8.5261	1.26284	0.00779969
MAST1	ENSG00000105613	8.87892	7.13372	1.61588	0.00787319
RP11-66B24.4	ENSG00000259583	6.41267	3.16151	2.58324	0.00790999
ABCB8	ENSG00000197150	9.62644	8.08219	1.48705	0.00796655
TAF1C	ENSG00000103168	11.4681	10.0522	1.36269	0.00801018
HYPM	ENSG00000187516	6.51346	3.86523	2.27096	0.00803611
TLE2	ENSG00000065717	9.58359	8.15142	1.415	0.00814464
RUSC2	ENSG00000198853	8.89281	7.54096	1.30887	0.00816595
MTFP1	ENSG00000242114	7.61329	4.83087	2.35462	0.00826725
AGAP2-AS1	ENSG00000255737	10.007	8.10664	1.79682	0.00839288
SLC12A5	ENSG00000124140	9.67174	8.06615	1.49228	0.00848351
NFATC1	ENSG00000131196	8.29344	6.73666	1.45519	0.00863171
ZNF141	ENSG00000131127	8.18061	6.76451	1.34085	0.00866265
LINC01143	ENSG00000237751	6.67546	3.63945	2.4624	0.00867035
RN7SL34P	ENSG00000239868	6.00731	0.572776	2.79763	0.00873799
MGAT4B	ENSG00000161013	12.3474	11.28	1.03572	0.00879503
RP5-1014D13.2	ENSG00000279738	6.79572	2.83729	2.70694	0.00892604
DIO3OS	ENSG00000258498	8.32814	6.12881	1.98591	0.00897428
LINC00176	ENSG00000196421	8.18398	5.82303	2.09013	0.00899388
RANBP3	ENSG00000031823	10.2126	9.13796	1.04241	0.00925511
NCLN	ENSG00000125912	9.76967	8.39703	1.37355	0.00964203
RP13-1032I1.7	ENSG00000262049	8.22666	6.66608	1.49054	0.00966171
C14orf79	ENSG00000140104	9.58751	7.86621	1.57734	0.00972232
SCN1B	ENSG00000105711	9.43996	7.56824	1.72656	0.00972795
GPR35	ENSG00000178623	8.36795	5.7937	2.12313	0.00980703
PRTN3	ENSG00000196415	7.23938	4.29522	2.3805	0.00985284
AGAP3	ENSG00000133612	11.1123	9.97248	1.1309	0.00994362

## Sheet: IP vs input (last 3 exons)
external_gene_name	ID	log2baseMean_CIRP	log2baseMean_Input	log2FoldChange_CIRP_vs_Input	padj_CIRP_vs_Input
STARD10	ENSG00000214530	15.8265	12.4428	3.36822	1.21495e-169
CEP131	ENSG00000141577	12.0429	8.61232	3.41448	1.45618e-133
ATP5D	ENSG00000099624	13.621	10.867	2.74287	1.39434e-117
CRK	ENSG00000167193	12.4585	9.37181	3.0735	3.05886e-110
PCSK1N	ENSG00000102109	13.4658	10.0162	3.42655	2.27073e-106
RPL28	ENSG00000108107	16.9589	13.8536	3.08583	6.62415e-103
MRPL12	ENSG00000262814	12.6142	9.98061	2.62401	4.66547e-101
SART1	ENSG00000175467	13.7084	10.5764	3.11424	8.62591e-99
RP11-488C13.5	ENSG00000258301	12.4496	8.55677	3.86657	6.06568e-94
PSMC3	ENSG00000165916	13.9216	10.76	3.14105	1.31764e-81
PPP1R14B	ENSG00000173457	14.3656	11.9917	2.36672	1.84772e-80
RBBP8NL	ENSG00000130701	11.4397	8.77247	2.65564	1.13413e-79
AKAP8L	ENSG00000011243	13.7872	10.7606	2.99926	5.32234e-78
EEF1D	ENSG00000104529	14.3471	11.7322	2.59826	4.10265e-77
DDR1	ENSG00000204580	13.1128	11.0514	2.05468	8.61814e-69
PCYT2	ENSG00000185813	11.6085	8.55847	3.02773	5.34086e-65
CYBA	ENSG00000051523	14.4217	11.8372	2.5696	2.28439e-60
AES	ENSG00000104964	14.3576	12.0147	2.32646	3.14622e-59
SF3A2	ENSG00000104897	12.5906	10.209	2.36902	4.56569e-58
ATP5I	ENSG00000169020	13.8154	12.0053	1.80373	5.80758e-58
RALY	ENSG00000125970	14.0616	11.4387	2.60022	5.02872e-57
NFIC	ENSG00000141905	13.1573	10.2807	2.85714	5.86649e-57
EGFL7	ENSG00000172889	13.3483	10.0909	3.22894	2.16658e-56
RPL35	ENSG00000136942	17.3371	14.7993	2.52624	1.44581e-55
TRMT1	ENSG00000104907	11.9776	9.63289	2.32995	2.81277e-55
KIF3B	ENSG00000101350	12.0008	8.41196	3.54969	2.55478e-54
ADGRL1	ENSG00000072071	14.0028	10.6861	3.2793	5.09595e-54
MED16	ENSG00000175221	11.1435	7.72538	3.37664	5.39818e-54
MEIS3	ENSG00000105419	11.4213	8.71917	2.68224	7.33866e-54
DNAJC4	ENSG00000110011	11.5014	9.15916	2.32912	1.16394e-53
PIGQ	ENSG00000007541	12.5338	9.42249	3.08293	2.03071e-52
DPP7	ENSG00000176978	14.0996	11.2973	2.77478	4.92991e-51
SYMPK	ENSG00000125755	12.3846	9.80469	2.55952	1.73797e-50
MPND	ENSG00000008382	12.3195	8.75933	3.51043	3.43431e-50
BSG	ENSG00000172270	15.9348	13.8445	2.07756	1.21939e-49
CC2D1A	ENSG00000132024	13.1531	10.2217	2.90055	2.01338e-49
FKBP8	ENSG00000105701	14.8465	11.9417	2.87562	5.00999e-49
IGDCC3	ENSG00000174498	12.2772	9.18951	3.06096	7.61527e-49
HAUS7	ENSG00000213397	11.3438	9.00984	2.31955	9.9736e-49
EDF1	ENSG00000107223	14.3344	12.5232	1.80499	1.99443e-48
SLC29A4	ENSG00000164638	11.8416	9.03031	2.78643	2.00161e-48
GADD45GIP1	ENSG00000179271	13.8034	11.0722	2.70518	3.24796e-48
OGFR	ENSG00000060491	11.4304	8.8433	2.56993	1.34984e-47
MPG	ENSG00000103152	12.6393	10.3053	2.32243	3.7263e-47
RP11-284F21.9	ENSG00000272068	10.2699	5.7861	4.4006	3.58482e-46
ZNF703	ENSG00000183779	14.1544	12.1171	2.02315	1.36677e-45
RNPEPL1	ENSG00000142327	12.8036	9.43466	3.32248	6.37774e-45
PRKCSH	ENSG00000130175	14.025	11.6332	2.3709	1.145e-44
GDI1	ENSG00000203879	13.0892	11.7178	1.36825	3.89792e-44
KIFC2	ENSG00000167702	13.8761	11.4968	2.36023	8.62216e-44
TJP3	ENSG00000105289	11.6288	9.16416	2.44444	5.07187e-43
CDT1	ENSG00000167513	12.7434	10.3039	2.42236	5.24926e-43
MAP2K2	ENSG00000126934	13.8772	10.7184	3.11467	6.60241e-43
LTBP3	ENSG00000168056	12.7349	10.3287	2.38061	1.54964e-42
INO80E	ENSG00000169592	13.3719	11.3073	2.05225	1.64997e-42
SLC2A4RG	ENSG00000125520	13.7898	11.7509	2.02643	2.40954e-42
NUCB1	ENSG00000104805	12.441	10.2489	2.17615	2.70508e-42
EPS8L1	ENSG00000131037	12.2686	9.98001	2.27401	8.96762e-42
PMEPA1	ENSG00000124225	14.4282	12.3186	2.09709	1.88384e-41
RPLP0P2	ENSG00000243742	10.33	6.65322	3.61528	3.4593e-41
HCFC1R1	ENSG00000103145	13.3095	11.3225	1.97301	4.85417e-41
ECI1	ENSG00000167969	13.0155	10.8382	2.16277	6.23092e-41
PODXL2	ENSG00000114631	12.4834	8.91444	3.51066	8.13043e-41
PMPCA	ENSG00000165688	11.8668	9.7039	2.15016	8.55312e-41
GAA	ENSG00000171298	12.6951	10.7129	1.97152	9.64749e-41
NFATC2IP	ENSG00000176953	12.6037	10.0274	2.55688	1.57792e-40
RPL18	ENSG00000063177	16.6489	15.1032	1.53923	5.63227e-40
WDR74	ENSG00000133316	12.4935	9.62361	2.83388	1.40985e-39
TMEM184A	ENSG00000164855	11.5394	9.46337	2.0656	2.61094e-39
NEK8	ENSG00000160602	11.1987	7.288	3.83267	3.50221e-39
CLN6	ENSG00000128973	12.7617	9.8769	2.84573	6.17995e-38
INTS1	ENSG00000164880	12.6182	9.42493	3.15581	8.89844e-38
PKM	ENSG00000067225	14.5465	13.3153	1.22805	1.34413e-37
GLTSCR2	ENSG00000105373	14.3006	11.3668	2.89531	7.72264e-37
PGLS	ENSG00000130313	12.1978	9.87657	2.30234	1.29335e-36
MAVS	ENSG00000088888	12.4257	10.169	2.23798	1.31236e-36
RABEP2	ENSG00000177548	11.5702	9.11359	2.43657	1.42365e-36
MACROD1	ENSG00000133315	13.2287	10.0754	3.10464	1.16439e-35
BCAM	ENSG00000187244	12.2628	10.5317	1.72395	2.24292e-35
COPE	ENSG00000105669	13.2195	11.2071	2.00495	2.97402e-35
PTPA	ENSG00000119383	14.4924	11.7815	2.67348	3.15563e-35
TSSC4	ENSG00000184281	10.7402	7.65305	3.04328	5.27183e-35
C9orf142	ENSG00000148362	13.3905	11.5683	1.80934	5.45308e-35
ZFPM1	ENSG00000179588	11.7576	9.01468	2.71683	6.34128e-35
MVD	ENSG00000167508	12.2035	9.37512	2.79332	6.55085e-35
MZT2B	ENSG00000152082	13.9955	11.9647	2.0159	8.30203e-35
SFN	ENSG00000175793	11.5454	9.26482	2.26441	7.42384e-34
AGPAT2	ENSG00000169692	14.149	10.8867	3.20696	1.23591e-33
DDAH2	ENSG00000213722	13.948	11.8358	2.09387	2.1881e-33
PPIB	ENSG00000166794	14.2771	13.0667	1.20627	2.5269e-33
NMRAL1	ENSG00000153406	12.5515	10.4016	2.12871	7.3976e-33
REEP6	ENSG00000115255	11.1651	9.30138	1.85342	8.56428e-33
SCAND1	ENSG00000171222	12.1917	9.79329	2.3688	1.05303e-32
NAA10	ENSG00000102030	12.2086	10.5819	1.61858	1.23665e-32
MGC2752	ENSG00000268784	9.76223	3.72381	5.71559	1.72875e-32
SGF29	ENSG00000176476	11.1307	8.98386	2.13091	2.30025e-32
G6PD	ENSG00000160211	13.5634	11.1283	2.42083	3.43971e-32
RPL13	ENSG00000167526	16.2403	14.7443	1.49026	5.54654e-32
CLDN4	ENSG00000189143	12.9457	11.1693	1.76991	9.53316e-32
DDX39A	ENSG00000123136	13.4059	11.4159	1.97142	1.08675e-31
IER5L	ENSG00000188483	14.6555	11.8195	2.79153	1.54936e-31
PRR36	ENSG00000183248	12.1894	9.63191	2.53422	1.93445e-31
PDZD4	ENSG00000067840	11.0581	8.71533	2.32154	2.48601e-31
SLC39A3	ENSG00000141873	10.174	7.28174	2.85809	4.68781e-31
RP11-44M6.3	ENSG00000184414	8.55414	2.09521	6.16088	8.58311e-31
UBTF	ENSG00000108312	12.3903	10.5254	1.85245	2.22032e-30
EEF1A2	ENSG00000101210	14.6237	12.3941	2.20585	2.44613e-30
EVL	ENSG00000196405	13.8299	12.1966	1.62464	3.22847e-30
ENKD1	ENSG00000124074	11.2571	8.96849	2.26538	3.64616e-30
TMEM254-AS1	ENSG00000230091	10.2532	6.35164	3.78696	5.26324e-30
RP11-496I9.1	ENSG00000254815	10.8184	8.6191	2.1799	8.41039e-30
AUP1	ENSG00000115307	14.0497	12.2834	1.75679	9.66515e-30
COL6A2	ENSG00000142173	11.6088	8.72846	2.83055	1.56063e-29
YIPF2	ENSG00000130733	12.0252	10.5445	1.47412	1.96344e-29
MISP	ENSG00000099812	12.21	10.0057	2.18567	2.09258e-29
MRPL41	ENSG00000182154	13.7755	11.8007	1.95963	2.6905e-29
C14orf80	ENSG00000185347	11.9692	9.18464	2.7436	3.35118e-29
PRELID1	ENSG00000169230	12.6615	10.7785	1.86996	3.71738e-29
SOX4	ENSG00000124766	14.6566	12.2056	2.42072	1.3159e-28
RBM42	ENSG00000126254	11.7635	9.72699	2.0254	1.37244e-28
HSPB1	ENSG00000106211	15.6759	14.5265	1.14462	1.40671e-28
MAD2L2	ENSG00000116670	11.0768	8.90674	2.15247	1.70906e-28
ST14	ENSG00000149418	12.4663	9.4281	2.98203	3.06212e-28
SLC35C1	ENSG00000181830	11.4885	9.9714	1.51055	3.61861e-28
TSTA3	ENSG00000104522	11.8373	10.1172	1.70991	4.46554e-28
RPL8	ENSG00000161016	17.0503	15.2349	1.80271	5.99468e-28
MIB2	ENSG00000197530	10.5053	8.13254	2.34516	6.07059e-28
SNX8	ENSG00000106266	10.4537	8.04602	2.38392	1.16606e-27
SLC25A10	ENSG00000183048	12.2854	9.25729	2.98589	1.35493e-27
RP11-54O7.16	ENSG00000272438	10.6186	5.65024	4.78327	1.41899e-27
CUX1	ENSG00000257923	12.0372	9.87504	2.14334	1.45977e-27
S100A13	ENSG00000189171	12.5525	11.2602	1.28854	2.63403e-27
DBP	ENSG00000105516	11.0026	9.09144	1.89711	3.01434e-27
CTB-25B13.12	ENSG00000267317	10.0339	6.69233	3.27077	3.30516e-27
KLF16	ENSG00000129911	10.979	7.70396	3.20644	4.03966e-27
C14orf132	ENSG00000227051	11.6678	7.70627	3.86531	5.58485e-27
TMEM222	ENSG00000186501	11.5611	9.1316	2.40043	6.62044e-27
TNNT1	ENSG00000105048	11.4808	9.28965	2.1695	7.17847e-27
IFITM3	ENSG00000142089	12.5733	10.9196	1.64615	9.01243e-27
MAP2K7	ENSG00000076984	11.2615	8.86679	2.36814	9.95931e-27
UBALD1	ENSG00000153443	11.4221	9.41317	1.99348	1.30571e-26
PGP	ENSG00000184207	11.581	9.60366	1.95971	1.36964e-26
ADRM1	ENSG00000130706	12.9256	10.827	2.07473	1.96712e-26
EIF3G	ENSG00000130811	12.1384	9.6697	2.42966	3.57111e-26
TRAPPC12	ENSG00000171853	11.2037	9.52197	1.6731	4.27082e-26
DSCAM-AS1	ENSG00000235123	15.9772	14.019	1.94924	4.36072e-26
C19orf81	ENSG00000235034	11.4605	9.05235	2.37466	8.95499e-26
C17orf62	ENSG00000178927	11.335	9.17652	2.13593	1.01712e-25
CCDC85B	ENSG00000175602	12.8932	9.42934	3.36528	1.01776e-25
PQBP1	ENSG00000102103	12.255	10.599	1.6465	1.13137e-25
PKN1	ENSG00000123143	12.9763	9.59854	3.29193	1.33577e-25
BOP1	ENSG00000261236	10.944	8.71559	2.20579	1.34184e-25
PACSIN3	ENSG00000165912	12.5046	10.2365	2.24469	2.44792e-25
KIF22	ENSG00000079616	13.2687	11.7786	1.48151	3.71142e-25
SEC61A1	ENSG00000058262	12.6767	11.1422	1.52498	5.16319e-25
MAPK11	ENSG00000185386	9.45096	5.95207	3.41934	6.079e-25
ABCA3	ENSG00000167972	12.144	9.36535	2.72173	6.09023e-25
MYL5	ENSG00000215375	10.4553	8.2274	2.20497	7.87539e-25
PLEKHN1	ENSG00000187583	9.90716	7.48642	2.39076	8.69417e-25
KRT18	ENSG00000111057	16.5653	14.5854	1.96103	1.07947e-24
CALML5	ENSG00000178372	10.8943	8.69233	2.17768	1.21851e-24
MCRIP1	ENSG00000225663	11.9868	9.34577	2.61036	1.32814e-24
CARM1	ENSG00000142453	13.411	10.967	2.42096	1.84778e-24
METTL26	ENSG00000130731	13.5317	11.6393	1.88066	2.38341e-24
MAZ	ENSG00000103495	14.8821	12.9294	1.9351	2.53601e-24
C4orf48	ENSG00000243449	11.9175	9.48225	2.39834	3.05057e-24
TBX2	ENSG00000121068	13.5131	11.7413	1.75532	5.67756e-24
MAPK8IP1	ENSG00000121653	11.1281	8.35375	2.71784	6.23622e-24
THAP4	ENSG00000176946	11.068	8.45357	2.57621	8.26392e-24
RP5-1065J22.8	ENSG00000273382	9.71158	6.17121	3.42955	8.36225e-24
PRR11	ENSG00000068489	11.7701	9.6907	2.06758	8.36225e-24
TESK1	ENSG00000107140	10.6173	8.57565	2.02042	1.06262e-23
TIMP1	ENSG00000102265	12.7531	11.3052	1.44051	1.19849e-23
MLST8	ENSG00000167965	11.7324	8.84139	2.85516	1.29872e-23
SUGP1	ENSG00000105705	10.9451	8.67852	2.24226	1.31357e-23
H2AFX	ENSG00000188486	14.0133	12.0102	1.98217	2.02867e-23
NSMF	ENSG00000165802	12.3116	9.69299	2.57521	2.20183e-23
MARCH9	ENSG00000139266	11.5044	9.45968	2.0319	3.53702e-23
TCIRG1	ENSG00000110719	10.9167	8.41319	2.4653	3.56474e-23
B4GALT2	ENSG00000117411	12.3887	9.49786	2.83804	3.6962e-23
MCRS1	ENSG00000187778	12.2647	10.5242	1.73251	3.69893e-23
NOSIP	ENSG00000142546	11.8903	9.09555	2.7468	3.98964e-23
AZU1	ENSG00000172232	9.60593	7.33641	2.24517	7.40971e-23
PLCB3	ENSG00000149782	12.7186	10.3944	2.30416	9.10892e-23
RRP1	ENSG00000160214	11.8358	9.46909	2.33291	1.07471e-22
TMEM160	ENSG00000130748	11.2523	8.63425	2.57479	1.50112e-22
CERCAM	ENSG00000167123	12.7726	10.8354	1.91536	1.71377e-22
PLXND1	ENSG00000004399	13.4097	11.3115	2.07345	2.24804e-22
C19orf53	ENSG00000104979	12.984	11.7688	1.20931	2.38082e-22
RPP25	ENSG00000178718	10.7037	8.55402	2.12629	2.50648e-22
ZNHIT1	ENSG00000106400	12.6135	11.4024	1.20596	2.75044e-22
COPS6	ENSG00000168090	12.4624	10.9235	1.53105	2.82181e-22
ST6GALNAC6	ENSG00000160408	11.8353	8.99467	2.7837	2.84298e-22
CTSD	ENSG00000117984	15.9635	13.5626	2.36098	4.13963e-22
TCF25	ENSG00000141002	12.1752	9.96558	2.17822	5.3629e-22
ARID5A	ENSG00000196843	10.11	7.48881	2.57475	5.39331e-22
SULT2B1	ENSG00000088002	11.3979	9.25526	2.12242	5.39331e-22
PSMD4	ENSG00000159352	13.7173	12.0249	1.68634	6.74117e-22
GRK6	ENSG00000198055	11.3408	9.09277	2.2264	8.81523e-22
POLD1	ENSG00000062822	10.6407	8.5089	2.10778	1.29861e-21
ATP5J2	ENSG00000241468	13.9023	11.9593	1.92521	1.31924e-21
PTDSS2	ENSG00000174915	11.5584	8.58007	2.90958	1.35987e-21
DDX54	ENSG00000123064	11.0647	9.04612	1.99698	1.51828e-21
CLU	ENSG00000120885	12.3733	10.3089	2.05343	1.71271e-21
FAM50A	ENSG00000071859	12.906	10.9897	1.89834	2.00592e-21
ELOF1	ENSG00000130165	12.2176	10.6863	1.52064	2.00592e-21
RP9P	ENSG00000205763	10.5074	8.14031	2.33381	2.58441e-21
STK11	ENSG00000118046	12.6094	9.80006	2.75055	2.83914e-21
FBXL6	ENSG00000182325	10.8737	9.34431	1.52011	3.21499e-21
CTD-2349P21.5	ENSG00000263603	9.1854	2.14364	6.19724	3.71826e-21
FAM193B	ENSG00000146067	11.714	10.4095	1.29937	3.73039e-21
EMC9	ENSG00000100908	11.2423	9.17197	2.04331	5.06712e-21
SEMA3B	ENSG00000012171	12.7702	10.8493	1.90804	5.24777e-21
C1orf159	ENSG00000131591	10.9078	9.18614	1.70811	5.43569e-21
FSTL3	ENSG00000070404	12.4798	9.67233	2.74903	7.3755e-21
NT5DC2	ENSG00000168268	11.9097	9.63518	2.25843	8.37128e-21
FASTK	ENSG00000164896	12.714	9.77013	2.87058	9.02369e-21
UCP2	ENSG00000175567	13.1818	11.5407	1.6281	1.06344e-20
MBD3	ENSG00000071655	12.4115	9.42893	2.91241	1.17981e-20
AURKAIP1	ENSG00000175756	12.3811	10.4179	1.94374	1.17981e-20
PACS2	ENSG00000179364	13.0358	10.5417	2.44916	1.33687e-20
MUC1	ENSG00000185499	12.5899	10.3875	2.18018	1.33687e-20
REXO1	ENSG00000079313	10.1805	8.20346	1.95826	1.34128e-20
ZNF213	ENSG00000085644	10.5975	8.23209	2.33622	1.41192e-20
MYL6	ENSG00000092841	11.7247	8.31194	3.30394	2.14172e-20
TM7SF2	ENSG00000149809	12.7509	11.4378	1.3063	2.68579e-20
SURF2	ENSG00000148291	11.5832	9.47662	2.07916	2.84483e-20
DNAJB2	ENSG00000135924	11.3249	9.11494	2.17467	3.25546e-20
MCRIP2	ENSG00000172366	11.3968	9.38972	1.9837	5.59867e-20
CTSA	ENSG00000064601	12.3329	11.0819	1.24575	5.72116e-20
HMG20B	ENSG00000064961	12.2498	10.5871	1.64781	5.99292e-20
FNDC10	ENSG00000228594	12.3511	9.31077	2.95703	6.19978e-20
KB-1732A1.1	ENSG00000253669	8.54579	3.25402	4.95652	6.32731e-20
EIF4EBP1	ENSG00000187840	12.682	11.1736	1.49715	6.58538e-20
FO538757.1	ENSG00000279457	10.5447	8.03255	2.47121	7.46305e-20
PTOV1	ENSG00000104960	12.707	10.737	1.95751	7.76608e-20
TRIM28	ENSG00000130726	13.4235	12.0009	1.41636	8.18658e-20
CTD-2589H19.6	ENSG00000271781	8.94294	5.61675	3.24889	1.12229e-19
CLTB	ENSG00000175416	11.8494	9.82446	2.00893	1.97375e-19
TOP1MT	ENSG00000184428	11.3584	9.3061	2.02749	2.47955e-19
IDH3G	ENSG00000067829	12.184	10.3067	1.85888	2.65676e-19
SSR2	ENSG00000163479	14.5018	12.6377	1.85789	2.80772e-19
PRRX2	ENSG00000167157	10.9253	8.0093	2.87142	2.82268e-19
DDX56	ENSG00000136271	11.8919	10.4887	1.39238	2.83245e-19
N4BP3	ENSG00000145911	12.8166	9.62268	3.09043	3.49816e-19
IRF3	ENSG00000126456	11.0299	9.61098	1.41219	3.73972e-19
HCN2	ENSG00000099822	11.7549	8.20733	3.42418	3.76373e-19
ILF3-AS1	ENSG00000267100	11.6596	8.92649	2.67684	4.33027e-19
ZNF358	ENSG00000198816	13.0404	9.57897	3.33191	5.16668e-19
KMT5C	ENSG00000133247	11.2001	9.46051	1.72185	5.2871e-19
LMNA	ENSG00000160789	12.4962	10.6973	1.77803	6.17607e-19
CHPF	ENSG00000123989	12.3498	9.91869	2.38592	7.25549e-19
ZC3H3	ENSG00000014164	10.4918	8.59037	1.88486	7.26999e-19
SRM	ENSG00000116649	11.1806	9.43762	1.72683	8.03584e-19
CDC20	ENSG00000117399	11.0129	9.54558	1.45688	8.72125e-19
NOC2L	ENSG00000188976	12.1838	10.4271	1.74477	9.29071e-19
RPL27A	ENSG00000166441	16.1146	14.3466	1.75769	9.71434e-19
TPD52L2	ENSG00000101150	13.2905	11.5852	1.69169	1.11584e-18
GABPB2	ENSG00000143458	10.3012	8.12328	2.15463	1.85048e-18
WDR34	ENSG00000119333	14.5577	11.8315	2.66323	1.97389e-18
MRPL55	ENSG00000162910	11.2424	8.83982	2.36781	2.08773e-18
TRAPPC2L	ENSG00000167515	11.64	10.0105	1.61735	2.21291e-18
DPP9	ENSG00000142002	13.0782	10.0022	2.99558	2.72514e-18
ITGB4	ENSG00000132470	13.3787	11.5102	1.84599	3.11251e-18
ZMIZ2	ENSG00000122515	12.0976	10.3214	1.75903	3.4165e-18
PHACTR4	ENSG00000204138	10.6466	7.98069	2.60078	3.65202e-18
GRK2	ENSG00000173020	12.0231	10.3634	1.64275	3.83679e-18
AC018442.1	ENSG00000235683	9.85924	3.71797	5.47487	4.32713e-18
FAM109A	ENSG00000198324	10.3481	7.22002	3.04502	4.69842e-18
RECQL4	ENSG00000160957	12.4937	10.3037	2.15096	4.85371e-18
RPS19BP1	ENSG00000187051	11.1046	9.31442	1.77218	5.67253e-18
WDR83	ENSG00000123154	11.8706	8.86273	2.93476	5.78801e-18
GAPDH	ENSG00000111640	16.6435	15.4972	1.14396	6.37472e-18
UQCC2	ENSG00000137288	11.7364	10.5476	1.18468	6.99988e-18
CCM2	ENSG00000136280	12.4895	10.0073	2.43053	1.012e-17
ARID3A	ENSG00000116017	10.866	8.92441	1.92074	1.11837e-17
CUEDC1	ENSG00000180891	11.1685	9.49175	1.66188	1.74291e-17
P4HB	ENSG00000185624	14.4346	13.3567	1.0743	2.16171e-17
MPST	ENSG00000128309	12.7917	10.5348	2.2179	2.17831e-17
RP4-724E16.2	ENSG00000197670	8.65977	4.764	3.74708	2.51515e-17
AC002044.4	ENSG00000272330	8.51267	5.18862	3.23412	2.72993e-17
HSP90AB4P	ENSG00000282100	8.89315	2.45877	5.61662	3.76936e-17
Z97634.3	ENSG00000236829	8.92459	4.96928	3.74824	4.16709e-17
MRPS26	ENSG00000125901	12.0581	10.6203	1.43299	4.28568e-17
SLC39A4	ENSG00000147804	11.3454	9.8518	1.48392	5.32222e-17
SLC25A11	ENSG00000108528	11.3104	9.59986	1.69812	6.96879e-17
SLC25A1	ENSG00000100075	12.8097	10.7199	2.0581	7.0752e-17
ASMTL	ENSG00000169093	10.7886	8.36788	2.37899	7.62171e-17
CD276	ENSG00000103855	11.9217	10.4353	1.47081	9.77347e-17
MLXIP	ENSG00000175727	11.959	9.83417	2.09546	1.26565e-16
GPX3	ENSG00000211445	10.2523	7.97202	2.24426	1.48469e-16
ASPHD1	ENSG00000174939	9.5308	7.16783	2.31936	2.08564e-16
C5orf38	ENSG00000186493	12.2207	9.77561	2.3924	2.31255e-16
SH3GLB2	ENSG00000148341	13.2393	11.869	1.36476	2.31255e-16
MVB12A	ENSG00000141971	11.0856	8.71584	2.32479	2.55462e-16
POLR2J	ENSG00000005075	13.1923	12.112	1.07524	2.68459e-16
AC092718.1	ENSG00000279362	7.78507	0.733418	6.02953	2.83065e-16
HOMER3	ENSG00000051128	10.8245	8.63264	2.15572	3.5833e-16
CRIP2	ENSG00000182809	12.925	11.8111	1.10799	3.90049e-16
ADAP1	ENSG00000105963	11.4216	7.99659	3.31588	4.3301e-16
TRAPPC1	ENSG00000170043	12.8238	10.8197	1.97775	4.93968e-16
TCOF1	ENSG00000070814	11.5965	8.82171	2.71219	5.02156e-16
ZNF282	ENSG00000170265	9.73078	7.66531	2.03594	5.30434e-16
DGKZ	ENSG00000149091	11.7072	9.27893	2.37995	5.70925e-16
ARRDC1-AS1	ENSG00000203993	10.1771	7.6318	2.48963	5.80726e-16
TRAPPC9	ENSG00000167632	10.183	7.76785	2.36991	6.47433e-16
DMAP1	ENSG00000178028	10.3327	8.22158	2.06946	7.19107e-16
MMP17	ENSG00000198598	11.3678	8.5546	2.74935	8.21938e-16
LRRC26	ENSG00000184709	10.0282	6.29375	3.57509	8.43513e-16
DTNB	ENSG00000138101	10.211	7.79713	2.35202	9.85606e-16
UQCRC1	ENSG00000010256	11.9063	9.74782	2.11799	1.09318e-15
RPUSD1	ENSG00000007376	11.5285	8.99192	2.49934	1.10542e-15
ZNF579	ENSG00000218891	10.6916	8.4181	2.21825	1.12767e-15
SAMD1	ENSG00000141858	12.7418	11.4004	1.33598	1.15261e-15
FOXM1	ENSG00000111206	11.8069	9.9524	1.83128	1.19448e-15
MYL6B	ENSG00000196465	10.4542	8.44857	1.97828	1.26261e-15
MYBL2	ENSG00000101057	12.9042	10.3901	2.45225	1.38005e-15
TNIP1	ENSG00000145901	11.644	9.58195	2.03207	1.41099e-15
MRPL28	ENSG00000086504	12.8407	10.292	2.48562	1.41952e-15
H2AFJ	ENSG00000246705	13.6748	12.1611	1.50644	1.46062e-15
C12orf43	ENSG00000157895	10.2581	7.7512	2.46604	1.51124e-15
CDK10	ENSG00000185324	13.1648	11.1484	1.98379	1.51875e-15
EIF3B	ENSG00000106263	13.4735	11.6604	1.79289	1.52941e-15
SEMA6B	ENSG00000167680	10.5591	7.49665	2.9614	1.55276e-15
MAP3K11	ENSG00000173327	12.791	9.55717	3.10187	1.68869e-15
TP53I13	ENSG00000167543	11.9637	9.25639	2.63368	1.79635e-15
RPS6KB2	ENSG00000175634	11.4019	9.0405	2.32286	1.86266e-15
SMIM22	ENSG00000267795	10.4257	8.67565	1.72746	1.90075e-15
NBL1	ENSG00000158747	10.7542	8.38456	2.32959	1.90501e-15
DMWD	ENSG00000185800	10.586	7.09318	3.3499	2.0343e-15
FLII	ENSG00000177731	10.9795	9.61497	1.35601	2.04677e-15
PRSS8	ENSG00000052344	12.973	10.9865	1.9653	2.17882e-15
CD2BP2	ENSG00000169217	11.7054	10.2778	1.41404	2.31859e-15
MAPK3	ENSG00000102882	11.8371	10.0788	1.74824	2.52384e-15
INF2	ENSG00000203485	13.2145	10.7926	2.38972	2.76017e-15
WNT7B	ENSG00000188064	10.3409	7.83573	2.44922	2.92821e-15
SLC22A31	ENSG00000259803	9.32298	5.98381	3.20426	3.35011e-15
PSMC5	ENSG00000087191	13.5253	11.2729	2.21121	3.43798e-15
LRRC45	ENSG00000169683	10.836	8.19089	2.5763	4.19874e-15
NCAPH2	ENSG00000025770	11.078	8.74929	2.2749	4.28095e-15
HSF1	ENSG00000185122	12.8374	10.566	2.23891	4.2979e-15
SIGIRR	ENSG00000185187	12.6212	10.3233	2.26802	5.18268e-15
RPS26P45	ENSG00000241765	7.72716	3.0136	4.42264	5.25159e-15
TMUB1	ENSG00000164897	12.3072	9.69726	2.53903	5.79792e-15
MATK	ENSG00000007264	11.0135	7.40999	3.44743	5.80776e-15
TXNRD2	ENSG00000184470	9.49735	7.21426	2.2458	6.79718e-15
CHTF18	ENSG00000127586	11.215	9.34083	1.84991	7.69271e-15
RACK1	ENSG00000204628	16.1226	14.5441	1.56229	8.84015e-15
MGMT	ENSG00000170430	11.2454	9.24295	1.97335	8.94993e-15
TBL3	ENSG00000183751	10.8059	8.35491	2.39337	1.03047e-14
QTRT1	ENSG00000213339	9.56785	7.76627	1.7813	1.09001e-14
RABL6	ENSG00000196642	12.7826	10.4353	2.29422	1.27492e-14
DYRK1B	ENSG00000105204	11.6581	9.03612	2.57259	1.3123e-14
KCNK6	ENSG00000099337	11.9182	9.91605	1.97798	1.36357e-14
ABHD11	ENSG00000106077	12.3922	10.4642	1.90162	1.42376e-14
HSPG2	ENSG00000142798	10.1857	8.51387	1.65678	1.50088e-14
PPIL2	ENSG00000100023	11.3782	10.2459	1.12667	1.8819e-14
SEMA3F	ENSG00000001617	12.1102	10.0837	1.99678	1.90677e-14
DRAP1	ENSG00000175550	12.544	11.0036	1.52405	2.44209e-14
PLPPR3	ENSG00000129951	9.90314	6.12304	3.59384	2.96153e-14
KRT8	ENSG00000170421	16.0869	14.925	1.15432	3.031e-14
PRPF6	ENSG00000101161	12.7758	10.5384	2.18567	3.05431e-14
GFOD1	ENSG00000145990	8.6667	6.04611	2.56497	3.2072e-14
PRR5	ENSG00000186654	8.76172	5.85051	2.82991	3.62006e-14
SF3B2	ENSG00000087365	13.0022	11.9547	1.04156	3.91974e-14
RHBDD2	ENSG00000005486	11.5863	9.81951	1.75145	3.96208e-14
NUDT22	ENSG00000149761	10.9843	8.36623	2.56734	4.3631e-14
KCNJ14	ENSG00000182324	10.213	5.72257	4.14738	4.4601e-14
NDUFS3	ENSG00000213619	12.7289	11.1681	1.54928	4.85032e-14
ACAP3	ENSG00000131584	11.854	9.85481	1.97072	6.27115e-14
NUDT14	ENSG00000183828	10.4003	7.64112	2.6693	6.38616e-14
CTNNBL1	ENSG00000132792	10.7528	8.70737	2.01504	6.48583e-14
ARHGDIG	ENSG00000242173	10.3213	7.05109	3.15837	7.88206e-14
LAD1	ENSG00000159166	11.6601	9.78161	1.85165	9.20515e-14
C19orf33	ENSG00000167644	10.653	7.97935	2.59659	1.16051e-13
LINC00311	ENSG00000179219	8.89928	2.52224	5.48665	1.18616e-13
HES4	ENSG00000188290	12.1067	10.206	1.87573	1.21241e-13
ARL2	ENSG00000213465	10.9467	8.9316	1.99229	1.25909e-13
PALM	ENSG00000099864	12.5858	9.29109	3.14335	1.46073e-13
NOS1AP	ENSG00000198929	9.58912	5.41471	3.81139	1.69315e-13
E2F1	ENSG00000101412	10.122	8.55676	1.54993	1.94783e-13
SORBS3	ENSG00000120896	10.4115	8.25042	2.12869	1.98554e-13
ZGPAT	ENSG00000197114	9.99554	8.33605	1.64464	2.41587e-13
LMF1	ENSG00000103227	10.9645	8.06396	2.79644	2.44126e-13
RRN3P3	ENSG00000257122	8.41746	6.02003	2.3501	2.71098e-13
NELFB	ENSG00000188986	11.3697	9.01504	2.29911	2.84047e-13
H1FX	ENSG00000184897	13.8225	12.6016	1.21652	2.84047e-13
RRP7A	ENSG00000189306	11.2227	8.69555	2.46207	2.87658e-13
SCAP	ENSG00000114650	10.396	8.53302	1.83476	3.00987e-13
PPP1R15A	ENSG00000087074	10.6568	9.30256	1.34281	3.18616e-13
NFKBIL1	ENSG00000204498	10.4354	8.44461	1.95139	3.3659e-13
ACADVL	ENSG00000072778	12.7496	11.6774	1.06698	3.37776e-13
RPS5	ENSG00000083845	13.4493	11.7085	1.71922	3.47698e-13
HSPBP1	ENSG00000133265	10.8754	8.35606	2.45508	3.59777e-13
SYT12	ENSG00000173227	10.8478	8.39096	2.40518	3.9819e-13
NDUFS8	ENSG00000110717	12.228	10.1671	2.03644	4.08179e-13
RP11-54O7.3	ENSG00000223764	12.923	10.2786	2.55975	4.47949e-13
RP11-158L12.4	ENSG00000279233	7.75005	3.90306	3.65377	4.55863e-13
RP11-792A8.4	ENSG00000272831	10.5939	8.46319	2.10074	4.67311e-13
AP1B1	ENSG00000100280	12.5137	10.1666	2.2864	4.75539e-13
ARHGDIA	ENSG00000141522	13.503	11.5336	1.93127	4.88448e-13
FZD2	ENSG00000180340	10.028	7.80982	2.16798	5.32394e-13
DGCR14	ENSG00000100056	10.9671	8.9917	1.93267	5.77969e-13
NOXA1	ENSG00000188747	11.3616	9.43802	1.89165	6.40295e-13
NPDC1	ENSG00000107281	12.8283	11.1301	1.67513	6.40295e-13
SLC25A29	ENSG00000197119	13.1791	10.6238	2.48403	6.72724e-13
SHKBP1	ENSG00000160410	10.502	8.52097	1.95198	7.1366e-13
CA11	ENSG00000063180	10.583	8.41831	2.12106	7.75134e-13
EEF2	ENSG00000167658	16.3796	14.6552	1.702	7.77203e-13
MAD1L1	ENSG00000002822	10.5017	7.6654	2.73447	8.00283e-13
CSNK1G2	ENSG00000133275	10.3817	8.82058	1.54476	8.28959e-13
ZMYND10	ENSG00000004838	9.19363	4.91425	3.94107	9.39812e-13
RAVER1	ENSG00000161847	12.2556	10.6442	1.59421	9.85007e-13
POLR2I	ENSG00000105258	10.6088	9.29048	1.30883	1.05643e-12
AMH	ENSG00000104899	11.4899	9.26771	2.17291	1.07052e-12
UBXN6	ENSG00000167671	11.2979	8.85619	2.37913	1.26769e-12
C7orf50	ENSG00000146540	11.9152	9.66222	2.20032	1.27104e-12
ARFGAP1	ENSG00000101199	12.2425	9.22678	2.89504	1.28947e-12
COL27A1	ENSG00000196739	9.68618	7.06884	2.55979	1.31175e-12
CCDC94	ENSG00000105248	11.0089	8.88118	2.08762	1.35723e-12
EHMT2	ENSG00000204371	11.6161	9.91122	1.68091	1.46135e-12
CAPS	ENSG00000105519	11.6535	9.9589	1.68542	1.57104e-12
ADCK5	ENSG00000173137	10.9238	8.73177	2.15064	1.65265e-12
VPS51	ENSG00000149823	11.8381	8.97004	2.75341	1.67583e-12
CCDC124	ENSG00000007080	11.9932	10.0073	1.94877	1.70613e-12
ZNF316	ENSG00000205903	10.7381	9.29852	1.42655	1.83594e-12
PDDC1	ENSG00000177225	11.4245	8.84458	2.50169	1.86848e-12
TMEM54	ENSG00000121900	12.0007	10.3875	1.60455	1.89003e-12
PLXNB2	ENSG00000196576	13.1017	11.3794	1.71005	1.94097e-12
PPP1R35	ENSG00000160813	11.8995	10.4886	1.39396	2.01718e-12
PPARD	ENSG00000112033	10.2917	8.21776	2.03308	2.23635e-12
PIEZO1	ENSG00000103335	13.3461	11.8837	1.44725	2.38723e-12
LA16c-431H6.6	ENSG00000261732	7.22832	1.87731	4.84725	2.42616e-12
PLPPR2	ENSG00000105520	11.0254	9.46076	1.55428	2.49838e-12
TFEB	ENSG00000112561	8.55748	5.95886	2.53075	2.70254e-12
SRRM2	ENSG00000167978	12.4847	11.3732	1.10129	2.78991e-12
LRRC23	ENSG00000010626	9.91407	6.54228	3.20149	2.79995e-12
CST3	ENSG00000101439	12.6369	11.513	1.11654	2.83597e-12
PRKCZ	ENSG00000067606	10.0624	8.52334	1.52623	2.98443e-12
CIZ1	ENSG00000148337	11.5066	9.44447	2.02238	3.07675e-12
RHPN1	ENSG00000158106	12.8254	10.9198	1.86905	3.64106e-12
POLR3H	ENSG00000100413	10.9338	9.07257	1.83147	3.7294e-12
C19orf60	ENSG00000006015	10.399	8.76992	1.61126	3.93549e-12
Y_RNA	ENSG00000252202	9.04635	3.53452	4.79576	3.95128e-12
CALM3	ENSG00000160014	11.9586	10.8844	1.06748	4.0608e-12
MCRIP2P1	ENSG00000241418	7.871	3.87056	3.76105	4.19516e-12
HYAL2	ENSG00000068001	11.6734	9.63608	2.02189	4.19516e-12
SMPD2	ENSG00000135587	9.42854	7.31364	2.07205	4.25481e-12
IFITM2	ENSG00000185201	11.6715	10.3607	1.29974	4.38182e-12
ARRDC2	ENSG00000105643	11.4514	10.1031	1.34007	4.38309e-12
EXTL3	ENSG00000012232	9.55067	7.32162	2.1817	4.93553e-12
NAPRT	ENSG00000147813	11.5519	9.54354	1.96789	5.00841e-12
RFXANK	ENSG00000064490	11.9523	10.1118	1.82513	5.27454e-12
PGGHG	ENSG00000142102	11.2667	9.65343	1.59363	5.33789e-12
LRRC10B	ENSG00000204950	10.3073	7.75051	2.48934	5.95303e-12
QRICH2	ENSG00000129646	8.37178	4.71369	3.46429	6.01712e-12
TUBB4B	ENSG00000188229	14.1563	12.6841	1.45544	6.83944e-12
ATAD3A	ENSG00000197785	11.0464	8.46924	2.49213	7.34372e-12
MROH6	ENSG00000204839	10.3049	8.62115	1.6597	7.46822e-12
PTPN18	ENSG00000072135	10.9366	9.69173	1.23425	7.91031e-12
ZNF629	ENSG00000102870	10.8841	9.03353	1.81996	8.60399e-12
VARS	ENSG00000204394	11.7687	9.46521	2.24222	8.86959e-12
LSM7	ENSG00000130332	11.6449	10.2899	1.34125	9.16727e-12
ARAF	ENSG00000078061	10.6499	9.12036	1.51272	9.4771e-12
KRT19	ENSG00000171345	15.5312	14.1425	1.37705	9.67077e-12
SIL1	ENSG00000120725	11.1408	8.6577	2.41342	9.82977e-12
TEN1	ENSG00000257949	10.6081	8.02372	2.52565	9.88862e-12
FIBP	ENSG00000172500	11.1463	8.87491	2.2312	1.03258e-11
NARF	ENSG00000141562	11.225	9.36928	1.84344	1.12983e-11
PYCRL	ENSG00000104524	10.1948	7.60211	2.51108	1.23467e-11
GDF11	ENSG00000135414	9.8072	8.35034	1.44432	1.29392e-11
WDR13	ENSG00000101940	11.2963	9.14725	2.09779	1.29549e-11
ATN1	ENSG00000111676	11.2244	9.86652	1.34372	1.33399e-11
RPS9	ENSG00000170889	12.9935	11.4202	1.55179	1.40421e-11
WDR18	ENSG00000065268	10.0163	7.72984	2.22504	1.46741e-11
RHOT2	ENSG00000140983	11.2982	9.86781	1.41205	1.47067e-11
TNK2	ENSG00000061938	12.9302	10.8258	2.06661	1.59928e-11
NFKBIB	ENSG00000104825	10.1532	7.77004	2.30925	1.62552e-11
AC007040.11	ENSG00000258881	7.95113	3.81613	3.85846	1.71873e-11
MEPCE	ENSG00000146834	11.426	9.48106	1.91602	1.99568e-11
TMEM132A	ENSG00000006118	12.3801	10.4049	1.9336	2.04514e-11
PDLIM7	ENSG00000196923	11.8144	10.5941	1.21151	2.07128e-11
ADPGK	ENSG00000159322	12.0854	9.877	2.16841	2.12979e-11
THAP7	ENSG00000184436	11.2385	8.8253	2.33461	2.24737e-11
HAGHL	ENSG00000103253	11.632	9.6534	1.94662	2.39592e-11
MIIP	ENSG00000116691	9.44313	7.37295	2.03633	2.48154e-11
NAT14	ENSG00000090971	11.6642	8.96334	2.61246	2.5884e-11
MOV10	ENSG00000155363	11.2957	10.1816	1.10879	2.77735e-11
LAMB2	ENSG00000172037	10.2616	8.47798	1.75893	3.16416e-11
PWWP2B	ENSG00000171813	10.0843	8.13075	1.91202	3.47101e-11
RNF208	ENSG00000212864	10.7871	8.17384	2.52479	3.48462e-11
TOB2P1	ENSG00000176933	8.10406	1.84021	5.20858	3.55324e-11
DRG2	ENSG00000108591	10.9938	9.19451	1.78158	3.87689e-11
TNFRSF18	ENSG00000186891	10.4785	7.58853	2.80515	3.97858e-11
PPAN	ENSG00000130810	9.96382	7.87237	2.0458	4.09266e-11
GALNT6	ENSG00000139629	9.4732	7.15883	2.25884	4.31664e-11
LY6E	ENSG00000160932	12.3626	11.1441	1.21325	4.37636e-11
CHST8	ENSG00000124302	7.90217	4.4912	3.2502	4.78471e-11
TBC1D16	ENSG00000167291	10.0797	8.30246	1.74798	4.91843e-11
PSKH1	ENSG00000159792	9.98558	7.78304	2.13821	5.0397e-11
DHCR7	ENSG00000172893	13.4688	12.145	1.32294	5.33408e-11
MCM5	ENSG00000100297	11.9623	9.63678	2.29018	6.06499e-11
SPNS1	ENSG00000169682	11.8383	9.42126	2.34206	6.07423e-11
ERBB3	ENSG00000065361	14.8403	12.9612	1.8472	6.19539e-11
IMPDH2	ENSG00000178035	12.5479	10.4716	2.05983	6.27438e-11
Metazoa_SRP	ENSG00000196274	6.92038	0	5.80421	6.39719e-11
NDUFA13	ENSG00000186010	12.8951	11.055	1.80673	6.4547e-11
SLC43A1	ENSG00000149150	10.002	7.79069	2.15735	6.70248e-11
FBXL8	ENSG00000135722	8.91615	5.6647	3.08133	6.71978e-11
FAM234A	ENSG00000167930	13.0265	10.5108	2.42592	6.74705e-11
SMYD5	ENSG00000135632	10.1556	8.55685	1.57722	7.32095e-11
DNAJC17	ENSG00000104129	9.94651	7.78304	2.10928	8.0502e-11
TAPBP	ENSG00000231925	12.5774	11.1248	1.44037	9.63527e-11
PNPLA6	ENSG00000032444	10.0509	7.30043	2.66812	9.64433e-11
ABCD1	ENSG00000101986	10.3644	7.44353	2.83981	1.00035e-10
GPS1	ENSG00000169727	12.6335	10.5144	2.09562	1.02266e-10
ABHD12	ENSG00000100997	12.1102	10.4273	1.66847	1.02333e-10
P2RY11	ENSG00000244165	9.87216	7.34192	2.45358	1.095e-10
YES1P1	ENSG00000224003	7.1105	2.85133	3.95158	1.10049e-10
FLAD1	ENSG00000160688	11.0046	8.97462	1.99306	1.30792e-10
C11orf84	ENSG00000168005	10.5269	8.92319	1.58422	1.40692e-10
RP11-51J9.5	ENSG00000271869	8.67179	5.8428	2.72886	1.43863e-10
C8orf82	ENSG00000213563	10.4793	8.8592	1.59921	1.56871e-10
RPL36	ENSG00000130255	13.789	12.742	1.0407	1.58358e-10
QARS	ENSG00000172053	12.1744	10.3387	1.80031	1.62784e-10
WDR24	ENSG00000127580	8.76889	6.80045	1.93244	1.67769e-10
ASPSCR1	ENSG00000169696	11.1439	8.42273	2.62138	1.69487e-10
C11orf80	ENSG00000173715	11.361	9.56791	1.75851	1.69487e-10
ANXA11	ENSG00000122359	11.5647	10.2707	1.28581	1.72886e-10
PRADC1	ENSG00000135617	10.0674	7.99153	2.02154	1.83154e-10
YPEL3	ENSG00000090238	13.5607	12.281	1.27135	2.02566e-10
CLDN9	ENSG00000213937	12.2319	10.2061	1.98009	2.28529e-10
CORO1B	ENSG00000172725	12.5848	10.4852	2.04468	2.4107e-10
NT5C	ENSG00000125458	11.4837	10.1701	1.30247	2.53291e-10
SURF1	ENSG00000148290	10.5175	9.49053	1.02152	2.79226e-10
GPC1	ENSG00000063660	12.0975	9.86488	2.17777	2.94063e-10
MEMO1	ENSG00000162959	9.85275	5.51484	3.90691	3.06342e-10
SNF8	ENSG00000159210	11.7318	10.3118	1.39864	3.20426e-10
ADRA2C	ENSG00000184160	11.071	9.23145	1.82098	3.2943e-10
EPN3	ENSG00000049283	11.3648	8.79982	2.4674	3.62142e-10
CASKIN1	ENSG00000167971	10.2063	8.17103	1.99143	3.64215e-10
ZDHHC12	ENSG00000160446	13.3389	11.1842	2.09425	3.68655e-10
RPS11	ENSG00000142534	16.1022	14.7281	1.37042	3.78779e-10
LRRC75B	ENSG00000178026	10.043	7.46859	2.49404	3.81957e-10
PEX11G	ENSG00000104883	8.44081	5.09071	3.18963	4.01898e-10
FBXW5	ENSG00000159069	12.1238	9.78899	2.25737	4.09289e-10
RABAC1	ENSG00000105404	10.9661	8.71441	2.21644	4.16333e-10
CBX6	ENSG00000183741	10.8657	9.64075	1.21448	4.20791e-10
ZNF688	ENSG00000229809	10.3812	8.53456	1.82627	5.08148e-10
RP4-591C20.9	ENSG00000268858	10.3903	7.58758	2.74037	5.29795e-10
NR1H2	ENSG00000131408	11.0899	9.69212	1.38394	5.6827e-10
TUSC2	ENSG00000114383	10.7734	9.72036	1.04739	5.6827e-10
THOC6	ENSG00000131652	11.6739	9.96668	1.67736	5.83788e-10
AKT1S1	ENSG00000204673	11.498	9.88544	1.58821	5.86749e-10
COL18A1	ENSG00000182871	13.6886	11.9611	1.6964	6.01411e-10
TADA3	ENSG00000171148	12.8228	11.1727	1.64357	6.05918e-10
EHD2	ENSG00000024422	10.9183	9.01013	1.87611	6.61888e-10
TBC1D10B	ENSG00000169221	12.0558	10.0629	1.94754	6.6784e-10
ARHGAP4	ENSG00000089820	10.058	8.48654	1.55227	6.75323e-10
TRMT61A	ENSG00000166166	11.3532	8.56742	2.65353	7.77433e-10
MAP3K10	ENSG00000130758	9.51609	7.77599	1.71394	8.23072e-10
MT-ND6	ENSG00000198695	10.7698	9.37414	1.37726	8.43607e-10
SGTA	ENSG00000104969	12.2944	9.78159	2.41603	9.38637e-10
CARS2	ENSG00000134905	10.2718	8.99866	1.26587	9.71771e-10
TCEA2	ENSG00000171703	11.7782	9.69602	2.02832	1.03102e-09
ZNF668	ENSG00000167394	9.85679	7.57124	2.21464	1.03133e-09
CDK16	ENSG00000102225	11.6635	10.0121	1.63901	1.09636e-09
ZNF511	ENSG00000198546	11.4933	10.1583	1.32785	1.18333e-09
JMJD7	ENSG00000243789	8.76338	6.12166	2.55304	1.18753e-09
BTBD2	ENSG00000133243	12.3317	10.1337	2.14359	1.21181e-09
ORAI2	ENSG00000160991	11.5035	8.13027	3.1373	1.23072e-09
BRD3	ENSG00000169925	11.5687	9.643	1.8929	1.38167e-09
PRKD3	ENSG00000115825	9.52175	6.56459	2.80188	1.42664e-09
RP11-548H3.1	ENSG00000273466	8.86215	6.27659	2.51268	1.46717e-09
SPATA20	ENSG00000006282	11.9428	10.3483	1.57411	1.47603e-09
SLC4A2	ENSG00000164889	11.4759	9.72477	1.72146	1.56589e-09
LGALS1	ENSG00000100097	12.432	11.2153	1.20918	1.59689e-09
PODNL1	ENSG00000132000	8.07086	5.2338	2.72221	1.63551e-09
ATP2A3	ENSG00000074370	11.8981	9.443	2.36244	1.6589e-09
CLUH	ENSG00000132361	11.1354	9.80705	1.31398	1.6589e-09
PI4KB	ENSG00000143393	11.2357	9.97774	1.24521	1.79845e-09
ALDOA	ENSG00000149925	15.7844	14.2907	1.47016	1.81968e-09
FAM53B	ENSG00000189319	10.7435	8.15375	2.48292	1.82261e-09
DDX49	ENSG00000105671	11.8592	9.7166	2.07973	1.86069e-09
ALMS1-IT1	ENSG00000230002	7.41088	4.50049	2.78247	1.95362e-09
NME3	ENSG00000103024	12.5778	10.8564	1.70538	1.95771e-09
SMG5	ENSG00000198952	10.1766	8.18873	1.9496	2.04198e-09
LOXL1	ENSG00000129038	13.2284	11.9646	1.25442	2.19105e-09
SSBP4	ENSG00000130511	11.4454	10.013	1.40933	2.2042e-09
RP11-501C14.9	ENSG00000270781	7.82217	2.67229	4.56564	2.20649e-09
EPS8L2	ENSG00000177106	10.6683	9.54701	1.11181	2.21118e-09
SLC52A2	ENSG00000185803	11.7404	9.5656	2.09901	2.21449e-09
CCDC153	ENSG00000248712	9.44468	7.64367	1.77021	2.24005e-09
SLC25A6	ENSG00000169100	14.2026	12.5868	1.58918	2.43686e-09
HIST1H2BG	ENSG00000273802	8.45822	4.74293	3.43024	2.46463e-09
EVA1B	ENSG00000142694	9.41072	6.58991	2.67415	2.65206e-09
COG8	ENSG00000272617	9.31664	6.64529	2.55411	2.74908e-09
FAM89B	ENSG00000176973	11.6363	10.1068	1.51094	2.84099e-09
GPR137	ENSG00000173264	10.0034	8.16737	1.80152	3.01472e-09
PRDX2	ENSG00000167815	12.136	10.7089	1.40823	3.05632e-09
TMC6	ENSG00000141524	10.9497	8.75434	2.17345	3.23487e-09
SPATA2L	ENSG00000158792	11.8083	8.94026	2.71663	3.3444e-09
CPSF1	ENSG00000071894	11.4942	10.3689	1.11511	3.49298e-09
HGS	ENSG00000185359	12.0203	10.4979	1.51033	3.57925e-09
BOK	ENSG00000176720	11.7374	8.96463	2.65212	3.67414e-09
C19orf48	ENSG00000167747	11.4768	9.77576	1.67686	3.86523e-09
C20orf27	ENSG00000101220	10.5344	8.94694	1.55886	3.94011e-09
NQO2	ENSG00000124588	10.4328	8.9069	1.51439	4.72042e-09
S100A11	ENSG00000163191	16.8928	15.6109	1.26734	5.05453e-09
MYH14	ENSG00000105357	13.1328	10.7003	2.33575	5.26369e-09
ACSF3	ENSG00000176715	9.86143	8.17161	1.65888	5.44471e-09
RECQL5	ENSG00000108469	11.6788	9.20943	2.36754	5.49889e-09
CNTROB	ENSG00000170037	10.8473	9.41642	1.40136	6.07449e-09
PTMS	ENSG00000159335	13.7209	12.4837	1.2257	6.66529e-09
RP11-331F4.5	ENSG00000280152	6.90932	1.76072	4.49354	7.64841e-09
FAM207A	ENSG00000160256	9.11866	6.44992	2.54623	7.94846e-09
IBA57	ENSG00000181873	7.94152	4.93008	2.87393	7.96099e-09
FAM3A	ENSG00000071889	11.8315	9.85575	1.92546	8.35337e-09
LIMD2	ENSG00000136490	10.6258	8.5242	2.06076	8.42602e-09
ANKRD24	ENSG00000089847	8.98294	5.83335	2.96861	8.82756e-09
GABRD	ENSG00000187730	8.24043	5.74056	2.40597	9.07924e-09
ZNF581	ENSG00000171425	9.78998	7.9841	1.77049	9.21153e-09
MAST4	ENSG00000069020	10.0465	7.38582	2.56477	9.33424e-09
PARP10	ENSG00000178685	8.16797	4.54976	3.34408	9.75164e-09
ANKRD16	ENSG00000134461	9.55293	7.13844	2.34813	9.75164e-09
CPTP	ENSG00000224051	10.5755	7.89126	2.55716	9.95756e-09
CIRBP	ENSG00000099622	10.0894	8.71948	1.35828	1.02542e-08
TIGD5	ENSG00000179886	9.81553	6.91873	2.73783	1.07256e-08
XYLT2	ENSG00000015532	10.9242	9.12793	1.74922	1.07665e-08
BRF1	ENSG00000185024	11.7803	9.50253	2.19173	1.07679e-08
LRFN4	ENSG00000173621	11.4707	8.09516	3.11875	1.08968e-08
LTBR	ENSG00000111321	13.3059	11.9158	1.37387	1.1037e-08
CTXN1	ENSG00000178531	11.5016	9.13404	2.28066	1.20408e-08
ATP13A1	ENSG00000105726	11.8066	10.0751	1.71226	1.21741e-08
CAMK2B	ENSG00000058404	10.6178	8.63859	1.93885	1.35579e-08
TBC1D17	ENSG00000104946	9.71741	7.79778	1.85764	1.41935e-08
SHC2	ENSG00000129946	10.4232	7.68234	2.67224	1.42372e-08
CTD-3035D6.1	ENSG00000213315	9.4367	6.49126	2.77989	1.44611e-08
CCDC107	ENSG00000159884	10.48	8.39842	2.05218	1.51981e-08
SPTBN2	ENSG00000173898	10.7875	8.55793	2.16646	1.58744e-08
IL17RC	ENSG00000163702	10.9713	8.26881	2.57293	1.59012e-08
NAA60	ENSG00000122390	11.6072	9.91505	1.66507	1.68541e-08
CAPG	ENSG00000042493	10.1114	7.9175	2.14747	1.6954e-08
RGS16	ENSG00000143333	8.16659	5.19976	2.82451	1.78038e-08
MUC5B	ENSG00000117983	12.0582	9.96476	2.03421	1.78593e-08
TAF6L	ENSG00000162227	10.2538	8.4669	1.75857	1.88708e-08
CCDC78	ENSG00000162004	11.471	10.0757	1.37876	1.93391e-08
PLXNA1	ENSG00000114554	11.0758	9.45942	1.59117	2.05167e-08
DYM	ENSG00000141627	9.78056	7.89281	1.84426	2.0777e-08
UQCRQ	ENSG00000164405	12.3048	11.2308	1.07369	2.13261e-08
FAM20C	ENSG00000177706	10.1882	8.14871	1.98345	2.18412e-08
U47924.6	ENSG00000240370	7.14006	3.43492	3.43745	2.22591e-08
NARFL	ENSG00000103245	11.4251	9.11601	2.21874	2.22654e-08
SPC24	ENSG00000161888	11.6823	10.4215	1.24993	2.22654e-08
SH3BP1	ENSG00000100092	10.347	8.42976	1.86574	2.3753e-08
PRPF19	ENSG00000110107	12.6824	10.9696	1.69157	2.44552e-08
FLNA	ENSG00000196924	14.3103	12.2736	1.97884	2.44578e-08
ODF3B	ENSG00000177989	7.01147	3.65999	3.15378	2.46843e-08
THBS3	ENSG00000169231	11.4284	10.2871	1.13366	2.50624e-08
BORCS7	ENSG00000166275	9.57881	7.28315	2.21343	2.59599e-08
FSCN1	ENSG00000075618	11.5709	10.1273	1.43752	3.08423e-08
PPP2R3B	ENSG00000167393	10.0724	8.42385	1.61645	3.26128e-08
HMGXB3	ENSG00000113716	10.4518	9.23085	1.21329	3.31265e-08
NAB2	ENSG00000166886	12.9292	11.5357	1.39	3.38911e-08
ESPN	ENSG00000187017	10.4196	7.91978	2.43082	3.5632e-08
FIBCD1	ENSG00000130720	10.791	8.44954	2.27946	3.56664e-08
EHBP1L1	ENSG00000173442	10.9897	8.09686	2.71292	3.57247e-08
ZNF395	ENSG00000186918	11.0569	9.326	1.69911	3.64809e-08
KLHL36	ENSG00000135686	12.1716	10.3146	1.82361	3.72144e-08
ZNF205	ENSG00000122386	11.6179	8.79079	2.66459	3.92026e-08
METRN	ENSG00000103260	12.6996	9.76085	2.7431	4.08574e-08
PRRT3	ENSG00000163704	10.4818	8.17678	2.21498	4.28572e-08
RHOC	ENSG00000155366	12.4759	11.1487	1.31467	4.75386e-08
NME1	ENSG00000239672	13.3294	12.1144	1.21637	4.75386e-08
LAMTOR2	ENSG00000116586	11.5344	9.77143	1.7455	4.79193e-08
EPHX1	ENSG00000143819	10.4809	8.63152	1.81171	4.81756e-08
NDUFS7	ENSG00000115286	10.1916	7.7017	2.39739	4.98441e-08
CLIP2	ENSG00000106665	9.78301	6.25275	3.20236	5.6092e-08
CTD-2540F13.2	ENSG00000267892	7.58427	4.47127	2.92282	6.40366e-08
TRAP1	ENSG00000126602	10.7499	9.19598	1.53793	6.67597e-08
SEZ6L2	ENSG00000174938	11.3472	9.86323	1.45893	6.99593e-08
REXO4	ENSG00000148300	10.5623	8.51516	1.97255	7.04787e-08
PAGR1	ENSG00000280789	8.79849	5.63297	3.02874	7.13442e-08
CHMP1A	ENSG00000131165	12.8674	10.688	2.12071	7.32773e-08
OSGIN1	ENSG00000140961	10.3214	7.62532	2.55449	7.39649e-08
KCNH3	ENSG00000135519	8.61566	6.38611	2.15891	7.6308e-08
MAP4	ENSG00000047849	12.0199	10.7249	1.28795	7.76222e-08
AP5Z1	ENSG00000242802	10.8394	9.4555	1.36161	8.85837e-08
BAD	ENSG00000002330	10.9122	8.45081	2.38444	9.0142e-08
ATAD3B	ENSG00000160072	10.4818	8.53323	1.87785	9.17436e-08
RIN1	ENSG00000174791	9.95753	7.67233	2.19499	9.30666e-08
NDUFB7	ENSG00000099795	11.8473	10.0019	1.79955	9.92198e-08
TSC2	ENSG00000103197	10.4616	9.00238	1.43414	1.00488e-07
RP11-104N10.2	ENSG00000274627	10.8097	6.72777	3.56989	1.0205e-07
GFER	ENSG00000127554	10.9772	8.6883	2.19362	1.13674e-07
ZNF444	ENSG00000167685	11.2967	9.18748	2.0847	1.18507e-07
ZER1	ENSG00000160445	11.4702	9.97139	1.4692	1.19226e-07
RP13-890H12.2	ENSG00000267288	8.54953	5.22283	3.07555	1.20636e-07
ETFB	ENSG00000105379	10.4239	8.56162	1.81009	1.21055e-07
IL27RA	ENSG00000104998	8.97917	7.29009	1.66049	1.21311e-07
RP11-708J19.1	ENSG00000260236	7.99717	4.57537	3.19229	1.24125e-07
RNA5SP463	ENSG00000199900	7.04441	0	5.30601	1.29023e-07
UBTD1	ENSG00000165886	9.00075	6.42786	2.47997	1.30542e-07
GAS2L1	ENSG00000185340	10.1527	8.10276	1.97993	1.3087e-07
LTBP4	ENSG00000090006	10.7135	8.93565	1.75632	1.37428e-07
OPTN	ENSG00000123240	8.48535	6.4253	2.00661	1.4294e-07
CPSF3L	ENSG00000127054	11.5922	9.87536	1.67907	1.45334e-07
ABCA7	ENSG00000064687	9.49708	6.54485	2.75879	1.46678e-07
UNC45A	ENSG00000140553	11.1426	9.05653	2.01288	1.46678e-07
SRRM3	ENSG00000177679	11.1953	8.4421	2.61365	1.50456e-07
TRPT1	ENSG00000149743	10.882	9.86241	1.01398	1.56259e-07
CHCHD10	ENSG00000250479	10.8897	9.74634	1.13266	1.61202e-07
C19orf70	ENSG00000174917	10.1455	8.08124	1.99651	1.66473e-07
PLEKHM2	ENSG00000116786	10.9154	8.8645	1.98653	1.67801e-07
FBXO31	ENSG00000103264	9.58696	8.16653	1.40147	1.70191e-07
ERCC1	ENSG00000012061	10.213	8.71244	1.48668	1.75106e-07
DHRS13	ENSG00000167536	9.44667	7.73763	1.6709	1.78141e-07
ZNF296	ENSG00000170684	8.8679	6.92542	1.9003	1.78535e-07
ZNF837	ENSG00000152475	9.2353	6.12845	2.88572	2.00543e-07
IGFBP4	ENSG00000141753	13.5055	12.3341	1.15778	2.02063e-07
TPM2	ENSG00000198467	10.9421	8.84625	2.01743	2.02964e-07
RP13-1032I1.11	ENSG00000275902	8.21208	5.67695	2.42561	2.07389e-07
CLDN3	ENSG00000165215	12.9711	11.7081	1.25055	2.08482e-07
SPATC1L	ENSG00000160284	10.0662	7.37265	2.61893	2.1086e-07
ITPK1	ENSG00000100605	11.4983	10.4284	1.06582	2.14367e-07
LAG3	ENSG00000089692	8.84596	6.89386	1.87996	2.47049e-07
FBXW4	ENSG00000107829	10.6336	9.00917	1.60607	2.54008e-07
GDPD3	ENSG00000102886	9.33666	8.10992	1.21323	2.54205e-07
MROH1	ENSG00000179832	11.4216	9.49001	1.87074	2.5841e-07
JARID2	ENSG00000008083	11.3707	9.99614	1.36296	2.63669e-07
PHKG2	ENSG00000156873	11.4228	10.176	1.23182	2.68493e-07
MAN1B1	ENSG00000177239	12.2781	10.0472	2.15374	2.74686e-07
SCAF1	ENSG00000126461	11.151	9.36817	1.76024	2.79533e-07
TYK2	ENSG00000105397	11.1585	9.84163	1.31222	2.82667e-07
SNTA1	ENSG00000101400	9.45684	5.97292	3.23902	2.86402e-07
CTD-3193K9.4	ENSG00000267042	7.51951	4.04278	3.24042	3.04378e-07
LONP1	ENSG00000196365	11.4431	9.64415	1.75147	3.04449e-07
MICALL2	ENSG00000164877	11.6096	10.3952	1.19381	3.07196e-07
AIP	ENSG00000110711	11.4688	9.65485	1.79533	3.20704e-07
CHD5	ENSG00000116254	9.10979	6.96023	2.08347	3.29252e-07
PTGES2	ENSG00000148334	11.8448	9.86625	1.90757	3.38232e-07
NFKB2	ENSG00000077150	9.45143	7.70766	1.70066	3.38232e-07
TPGS1	ENSG00000141933	9.26662	6.08259	2.94914	3.39851e-07
TRAF2	ENSG00000127191	10.8179	8.35253	2.33397	3.41738e-07
TBRG4	ENSG00000136270	11.6312	9.93416	1.66217	3.41753e-07
AP2A2	ENSG00000183020	10.9343	9.03163	1.86585	3.47244e-07
MKS1	ENSG00000011143	10.6374	9.18297	1.43193	3.73425e-07
CLCN7	ENSG00000103249	12.5026	10.0065	2.3708	3.74066e-07
CCHCR1	ENSG00000204536	10.4598	8.43673	1.98808	3.90315e-07
NCS1	ENSG00000107130	10.6926	9.65214	1.03128	3.90315e-07
PUSL1	ENSG00000169972	10.4177	8.41732	1.93607	3.90321e-07
STX10	ENSG00000104915	11.8762	10.2032	1.66987	3.9149e-07
UQCC3	ENSG00000204922	11.1896	9.31477	1.82518	4.0081e-07
STAP2	ENSG00000178078	11.463	9.21626	2.14916	4.02808e-07
NPW	ENSG00000183971	8.16258	6.10372	1.99651	4.24657e-07
RP5-902P8.12	ENSG00000260179	5.98149	0.333628	4.5401	4.334e-07
FADS2	ENSG00000134824	9.24882	7.23746	1.92436	4.48548e-07
SEPN1	ENSG00000162430	10.7503	9.3013	1.42283	4.4889e-07
SHROOM1	ENSG00000164403	9.14461	5.49583	3.23382	4.6024e-07
NPLOC4	ENSG00000182446	11.3319	9.42878	1.85301	4.67288e-07
FAAH	ENSG00000117480	10.4771	8.65328	1.78407	4.98197e-07
RASGEF1C	ENSG00000146090	7.71669	4.40374	3.06707	5.00216e-07
RXRB	ENSG00000204231	9.4969	7.9448	1.53026	5.21806e-07
GLB1L2	ENSG00000149328	8.88499	5.8277	2.83864	5.25018e-07
CORO7	ENSG00000262246	10.4175	8.43367	1.90627	5.29063e-07
DDX41	ENSG00000183258	11.5572	10.2844	1.25419	5.37484e-07
HDAC5	ENSG00000108840	10.3354	8.3132	1.95056	5.43947e-07
GMIP	ENSG00000089639	9.61936	8.00847	1.56925	5.44406e-07
UCK1	ENSG00000130717	12.9308	11.0941	1.78269	5.79043e-07
VWA1	ENSG00000179403	10.8551	8.63034	2.15981	6.11523e-07
LRFN3	ENSG00000126243	9.48825	5.61504	3.39702	6.57435e-07
CRLF1	ENSG00000006016	10.8837	8.902	1.9281	6.91252e-07
ZNF628	ENSG00000197483	8.70137	5.90237	2.65277	6.92097e-07
BCAR1	ENSG00000050820	10.5606	9.07966	1.45665	7.06388e-07
CDK18	ENSG00000117266	10.8764	9.12061	1.7079	7.21181e-07
GIT1	ENSG00000108262	11.5332	9.42732	2.02297	7.23639e-07
NDUFV1	ENSG00000167792	11.0197	9.43921	1.57429	7.33387e-07
FAAP100	ENSG00000185504	10.688	8.61787	2.001	7.56563e-07
AGTRAP	ENSG00000177674	10.3165	8.81703	1.47214	7.56563e-07
FBXO2	ENSG00000116661	10.2217	8.19346	1.96376	7.63345e-07
KAZALD1	ENSG00000107821	9.43371	7.21891	2.15074	7.77893e-07
MGAT1	ENSG00000131446	11.2586	9.3081	1.93569	7.86631e-07
DGCR6L	ENSG00000128185	9.88576	7.76367	2.0386	8.25982e-07
SH2B2	ENSG00000160999	9.32028	6.62984	2.6043	8.30497e-07
GNL1	ENSG00000204590	10.6667	9.3959	1.26334	8.31748e-07
RBM10	ENSG00000182872	11.1445	9.60439	1.51606	8.37499e-07
CLIC3	ENSG00000169583	11.0327	9.33341	1.64787	8.5214e-07
CATSPER1	ENSG00000175294	8.51887	5.77367	2.57158	8.56381e-07
SCYL1	ENSG00000142186	12.7822	10.6209	2.08091	9.12643e-07
ECSIT	ENSG00000130159	10.3093	8.44583	1.83108	9.35136e-07
PYCARD	ENSG00000103490	10.8726	9.75105	1.11077	9.46641e-07
MC1R	ENSG00000258839	11.0223	8.64427	2.26557	9.51416e-07
SPDEF	ENSG00000124664	12.0054	9.93921	1.98433	9.73048e-07
CCDC137	ENSG00000185298	10.7348	9.13083	1.56639	9.8134e-07
WDTC1	ENSG00000142784	9.38271	8.14692	1.22057	9.96078e-07
CCDC83	ENSG00000150676	8.74807	6.76581	1.92354	1.02215e-06
GTF3C1	ENSG00000077235	12.3011	10.5195	1.72554	1.03958e-06
NENF	ENSG00000117691	11.4919	10.2299	1.24282	1.04959e-06
SEPT1	ENSG00000180096	9.04184	6.77828	2.1805	1.06852e-06
EME2	ENSG00000197774	10.5558	9.32984	1.21766	1.06984e-06
GRAMD1A	ENSG00000089351	10.5761	8.65527	1.86873	1.11835e-06
ARFRP1	ENSG00000101246	10.8113	8.18411	2.51226	1.1184e-06
E4F1	ENSG00000167967	11.7672	10.3586	1.3823	1.17228e-06
C17orf96	ENSG00000273604	9.17922	7.34276	1.79676	1.19625e-06
HMOX2	ENSG00000103415	9.42742	8.06406	1.3445	1.20761e-06
ALDH16A1	ENSG00000161618	10.4201	9.08133	1.31884	1.20761e-06
ARHGAP45	ENSG00000180448	9.31194	7.24581	1.9973	1.21069e-06
SLC7A5	ENSG00000103257	13.1751	11.567	1.56819	1.22123e-06
INO80B	ENSG00000115274	10.3992	8.6103	1.7416	1.22688e-06
SNRPA	ENSG00000077312	12.3595	11.1823	1.16362	1.23948e-06
RP11-706O15.1	ENSG00000205664	9.15262	7.9727	1.16795	1.25727e-06
ECE1	ENSG00000117298	11.737	9.70889	1.98181	1.31241e-06
ENDOG	ENSG00000167136	10.2222	8.62824	1.57069	1.47916e-06
LSR	ENSG00000105699	12.7213	11.4858	1.23335	1.5595e-06
USP11	ENSG00000102226	10.0058	8.94786	1.04587	1.63803e-06
RP11-212P7.2	ENSG00000273270	8.6061	5.94467	2.54701	1.64629e-06
TELO2	ENSG00000100726	11.3575	9.33378	1.94283	1.67664e-06
ZMYND8	ENSG00000101040	13.045	11.4663	1.54129	1.703e-06
ASCL1	ENSG00000139352	8.54314	5.56069	2.78576	1.70877e-06
PRRT2	ENSG00000167371	8.27329	5.85988	2.2957	1.72994e-06
RUVBL2	ENSG00000183207	11.4122	9.51195	1.84667	1.77597e-06
TNFAIP8L1	ENSG00000185361	8.71966	6.62321	2.0154	1.78247e-06
RP11-348N5.9	ENSG00000278601	8.40305	4.44335	3.3908	1.7841e-06
UBALD2	ENSG00000185262	10.7441	9.40989	1.32583	1.7841e-06
C6orf89	ENSG00000198663	10.7706	9.60507	1.15203	1.80006e-06
ENTPD6	ENSG00000197586	11.3393	9.45663	1.83055	1.83149e-06
SERTAD3	ENSG00000167565	11.2394	10.1745	1.05198	1.84356e-06
ATG4D	ENSG00000130734	9.91072	8.16902	1.68162	1.92265e-06
BLOC1S1	ENSG00000135441	11.467	9.82711	1.62674	1.92899e-06
FGD1	ENSG00000102302	10.352	8.59436	1.72217	1.9838e-06
C1QTNF6	ENSG00000133466	10.51	8.5486	1.88651	2.02616e-06
EIF3K	ENSG00000178982	10.4635	9.04084	1.40254	2.02832e-06
CTDSP1	ENSG00000144579	11.8661	10.5804	1.26244	2.14332e-06
CUL9	ENSG00000112659	9.70486	7.85138	1.77429	2.14989e-06
ABHD14B	ENSG00000114779	10.8677	9.071	1.76454	2.16356e-06
RPL13P12	ENSG00000215030	10.4864	9.25736	1.22215	2.1842e-06
GSC	ENSG00000133937	9.13706	7.14588	1.93455	2.22086e-06
SMG6	ENSG00000070366	10.3275	7.77507	2.39587	2.27875e-06
ANO10	ENSG00000160746	9.72763	8.02002	1.65182	2.27875e-06
SH3BP2	ENSG00000087266	11.4629	9.05873	2.27034	2.40232e-06
TRMU	ENSG00000100416	9.72626	8.23027	1.46129	2.41661e-06
FPGS	ENSG00000136877	10.4678	8.68036	1.753	2.47837e-06
PPP1CA	ENSG00000172531	12.865	11.5907	1.26456	2.49684e-06
TMEM86B	ENSG00000180089	8.74908	5.97442	2.60834	2.68846e-06
FBXL19	ENSG00000099364	9.09789	7.16709	1.86876	2.68846e-06
CYSRT1	ENSG00000197191	8.4341	5.83931	2.44021	2.69042e-06
CCDC159	ENSG00000183401	9.71467	7.82232	1.85701	2.71529e-06
TWF2	ENSG00000247596	9.85251	8.11312	1.7057	2.72322e-06
HID1	ENSG00000167861	12.0203	10.4065	1.59837	2.79725e-06
FSD1	ENSG00000105255	10.4194	7.8415	2.50195	2.83552e-06
CHST12	ENSG00000136213	10.3211	8.01649	2.20048	2.86808e-06
DMPK	ENSG00000104936	10.6378	9.05805	1.54456	2.98456e-06
SLC4A3	ENSG00000114923	9.30351	7.1052	2.11537	3.06749e-06
RPS15	ENSG00000115268	12.813	11.339	1.44053	3.09001e-06
RAPGEF3	ENSG00000079337	7.74812	4.56452	2.97036	3.20366e-06
NINJ1	ENSG00000131669	11.9115	10.6077	1.28382	3.27584e-06
FUK	ENSG00000157353	9.83081	8.63381	1.18265	3.33874e-06
PLEC	ENSG00000178209	13.9889	12.2309	1.71179	3.3864e-06
RXRA	ENSG00000186350	12.4366	10.5856	1.80587	3.431e-06
MAP3K6	ENSG00000142733	9.5067	8.20543	1.28165	3.71432e-06
RP4-605O3.4	ENSG00000272368	7.79714	4.56587	2.98699	3.8953e-06
MAF1	ENSG00000179632	12.4825	10.5713	1.84123	3.93944e-06
RCC1L	ENSG00000274523	10.5718	9.45709	1.10153	4.05728e-06
DNM1	ENSG00000106976	10.1344	8.47675	1.61655	4.1455e-06
IFRD2	ENSG00000214706	10.5538	9.11671	1.41428	4.21444e-06
RTFDC1	ENSG00000022277	12.0973	10.929	1.1688	4.2472e-06
TAOK2	ENSG00000149930	11.2672	9.65128	1.58099	4.3482e-06
GCAT	ENSG00000100116	10.0068	7.75438	2.18087	4.4978e-06
TUBGCP6	ENSG00000128159	10.4521	8.58456	1.8015	4.64991e-06
LMX1B	ENSG00000136944	9.99587	8.31305	1.63973	4.74176e-06
KCNQ1OT1	ENSG00000269821	10.8309	7.89684	2.68895	4.77231e-06
NOMO1	ENSG00000103512	10.6881	9.06199	1.61735	4.78467e-06
UNC13D	ENSG00000092929	10.2583	8.42736	1.76134	4.83301e-06
LMTK3	ENSG00000142235	12.3102	10.4984	1.76743	4.9452e-06
MYO9B	ENSG00000099331	10.3973	8.83781	1.53848	5.22077e-06
RP11-54O7.1	ENSG00000230699	8.76395	4.73358	3.42138	5.38956e-06
LPAR2	ENSG00000064547	10.3774	8.21671	2.11469	5.59564e-06
PDXK	ENSG00000160209	12.5599	11.1222	1.40767	5.75499e-06
MKL1	ENSG00000196588	10.1104	8.28836	1.75899	5.84796e-06
NPRL3	ENSG00000103148	11.0807	9.61294	1.43215	5.84796e-06
ADAM15	ENSG00000143537	12.7595	10.4546	2.17183	5.95275e-06
HRAS	ENSG00000174775	12.0805	9.63976	2.31768	6.11435e-06
KBTBD6	ENSG00000165572	8.18429	6.59722	1.55224	6.52844e-06
NUMA1	ENSG00000137497	13.2081	11.8424	1.33778	6.76171e-06
XRCC1	ENSG00000073050	11.0631	8.78558	2.17898	7.01866e-06
CD320	ENSG00000167775	9.34323	7.62756	1.67691	7.28319e-06
PRX	ENSG00000105227	7.98684	4.2496	3.25424	7.54828e-06
TRMT2A	ENSG00000099899	11.396	9.70616	1.67393	7.86096e-06
NPAS1	ENSG00000130751	8.92812	5.45714	3.07959	8.52218e-06
PRRC2A	ENSG00000204469	12.0089	10.7798	1.22129	8.57122e-06
LCAT	ENSG00000213398	8.91041	7.28502	1.59042	8.61546e-06
MARK4	ENSG00000007047	10.5005	8.42547	1.99864	9.07308e-06
EEF1DP1	ENSG00000228887	7.39401	4.80632	2.4347	9.18686e-06
RP11-666A20.4	ENSG00000248787	7.15143	2.72567	3.76882	9.23002e-06
CAPNS1	ENSG00000126247	13.8352	12.2354	1.56269	9.58154e-06
RP11-429J17.5	ENSG00000254548	6.7789	3.27107	3.13653	9.82967e-06
SHARPIN	ENSG00000179526	11.0116	9.47368	1.49805	9.92999e-06
APEH	ENSG00000164062	9.10783	7.78811	1.29827	9.98705e-06
RN7SL233P	ENSG00000242971	7.81269	3.93843	3.48112	1.00715e-05
RARA	ENSG00000131759	11.3632	9.92536	1.40309	1.05708e-05
SEC14L2	ENSG00000100003	7.77078	5.56666	2.10229	1.05911e-05
RP11-717D12.1	ENSG00000214773	6.45905	2.26177	3.53785	1.07102e-05
LINC00482	ENSG00000185168	7.88962	5.01413	2.65449	1.08086e-05
FBF1	ENSG00000188878	9.73013	8.59055	1.12403	1.09963e-05
LRCH4	ENSG00000077454	10.0609	8.54764	1.47878	1.10001e-05
RP11-417O11.5	ENSG00000225761	6.7856	1.62158	4.0277	1.19132e-05
GPX4	ENSG00000167468	12.7255	11.3748	1.32534	1.19352e-05
LRRC29	ENSG00000125122	8.46133	5.23199	2.91142	1.20526e-05
CTD-2062F14.2	ENSG00000258500	6.79457	3.07301	3.31553	1.23766e-05
PEMT	ENSG00000133027	9.92963	7.91891	1.97393	1.25592e-05
ATAD3C	ENSG00000215915	8.85926	6.07125	2.56017	1.28466e-05
ABTB1	ENSG00000114626	9.58936	7.67085	1.84343	1.28609e-05
RP11-332E4.1	ENSG00000214748	7.96963	5.44673	2.36233	1.28674e-05
HIST1H1B	ENSG00000184357	7.50713	3.10117	3.71219	1.3273e-05
KIAA0930	ENSG00000100364	10.4803	8.01871	2.40031	1.35387e-05
DGAT1	ENSG00000185000	10.3778	8.12669	2.16867	1.38122e-05
NPIPP1	ENSG00000188599	9.34475	7.8267	1.48297	1.38122e-05
DENND1A	ENSG00000119522	9.38837	7.83057	1.51663	1.4086e-05
SUPT6H	ENSG00000109111	10.8782	9.37214	1.50242	1.42386e-05
RIN3	ENSG00000100599	8.28	5.70265	2.40613	1.42485e-05
EML3	ENSG00000149499	11.3683	9.54902	1.8202	1.48415e-05
PHLDA3	ENSG00000174307	11.9888	10.414	1.56873	1.52781e-05
ENDOV	ENSG00000173818	9.8368	8.64236	1.18329	1.54766e-05
ABCF1	ENSG00000204574	10.3616	9.29529	1.05659	1.57662e-05
KAT8	ENSG00000103510	10.9337	9.56841	1.33542	1.64686e-05
PLXNB1	ENSG00000164050	12.0337	10.4921	1.52003	1.67897e-05
DVL3	ENSG00000161202	11.1212	10.0453	1.06145	1.69544e-05
HIPK1-AS1	ENSG00000235527	8.59462	5.96488	2.44213	1.71427e-05
MAST1	ENSG00000105613	8.61861	5.9309	2.51217	1.73678e-05
TPRN	ENSG00000176058	10.7312	8.24508	2.38714	1.74149e-05
EPHB4	ENSG00000196411	10.5086	9.30827	1.18725	1.81768e-05
CENPM	ENSG00000100162	9.51866	8.26086	1.23626	1.83698e-05
ELP6	ENSG00000163832	9.23451	7.84669	1.36175	1.85145e-05
LRRC24	ENSG00000254402	8.6011	6.51986	1.98624	1.86228e-05
RIMS4	ENSG00000101098	9.43234	6.81466	2.41096	1.86596e-05
ANKS3	ENSG00000168096	10.2645	8.72439	1.49787	1.96027e-05
PAFAH1B3	ENSG00000079462	10.7528	8.97126	1.74251	1.96056e-05
PEX10	ENSG00000157911	10.1745	8.82196	1.32379	2.10105e-05
PFKL	ENSG00000141959	11.5558	9.66312	1.81098	2.18647e-05
AGAP2	ENSG00000135439	8.33495	6.14915	2.06719	2.21338e-05
SKIV2L	ENSG00000204351	9.80549	8.21544	1.54251	2.29294e-05
CNPY3	ENSG00000137161	10.8716	9.77087	1.08836	2.4025e-05
WDR62	ENSG00000075702	9.78748	8.28256	1.48715	2.41132e-05
KIAA1683	ENSG00000130518	11.0409	9.06124	1.88548	2.44356e-05
SELO	ENSG00000073169	9.37017	8.1255	1.22818	2.47292e-05
SAC3D1	ENSG00000168061	10.6131	9.23715	1.34546	2.51257e-05
GABBR2	ENSG00000136928	8.16156	5.88019	2.13224	2.51917e-05
ZNF219	ENSG00000165804	10.3727	8.04121	2.18409	2.54147e-05
TSPAN4	ENSG00000214063	9.37433	7.00938	2.2141	2.55497e-05
CDK5RAP2	ENSG00000136861	9.88753	8.2711	1.59606	2.55799e-05
ZMYND19	ENSG00000165724	10.7017	9.60317	1.0781	2.56098e-05
FGFRL1	ENSG00000127418	10.9327	8.82086	2.06216	2.59508e-05
MORC2	ENSG00000133422	11.235	9.91315	1.3034	2.62256e-05
PREB	ENSG00000138073	11.002	9.34901	1.65031	2.6469e-05
CYFIP2	ENSG00000055163	9.3465	7.60957	1.67565	2.66306e-05
RAD9A	ENSG00000172613	10.8512	9.56456	1.27615	2.73189e-05
STRN4	ENSG00000090372	10.9803	9.86097	1.11473	2.79329e-05
ATXN7L1	ENSG00000146776	8.25858	5.5225	2.57644	2.96936e-05
RAB3IL1	ENSG00000167994	8.6045	6.32591	2.16968	2.9846e-05
CTB-50L17.8	ENSG00000280239	8.67648	5.00233	3.15698	3.10515e-05
PTPN6	ENSG00000111679	9.9407	8.734	1.18903	3.14064e-05
NCOR2	ENSG00000196498	11.1673	9.80977	1.33103	3.15788e-05
DHX33	ENSG00000005100	9.34795	7.41462	1.87827	3.25279e-05
SLC43A2	ENSG00000167703	10.2685	7.74429	2.33529	3.32077e-05
ZNF414	ENSG00000133250	8.25677	5.41749	2.57074	3.36609e-05
METRNL	ENSG00000176845	12.0483	10.75	1.2779	3.37639e-05
NSMCE1	ENSG00000169189	11.4045	10.0804	1.3066	3.40952e-05
PLD3	ENSG00000105223	12.0077	10.1641	1.76479	3.45375e-05
PPP2R5D	ENSG00000112640	10.0417	8.69581	1.32504	3.50957e-05
ANKRD9	ENSG00000156381	10.7165	8.87526	1.769	3.52068e-05
CHID1	ENSG00000177830	9.48547	7.70392	1.72906	3.54852e-05
ZNF821	ENSG00000102984	9.69613	7.92367	1.72135	3.60538e-05
LEMD2	ENSG00000161904	10.7448	9.32952	1.38479	3.62909e-05
IDH2	ENSG00000182054	12.5902	11.4775	1.1019	3.71437e-05
NRSN2	ENSG00000125841	10.2329	8.87469	1.33492	3.72864e-05
ASB6	ENSG00000148331	10.3391	9.17802	1.15138	3.85692e-05
HINT2	ENSG00000137133	9.86802	8.78151	1.07819	4.07478e-05
POLA2	ENSG00000014138	9.6996	8.49019	1.18987	4.35459e-05
THAP3	ENSG00000041988	9.65298	7.6184	1.93695	4.5852e-05
MMP15	ENSG00000102996	10.6872	8.40689	2.13682	4.59383e-05
PYGB	ENSG00000100994	11.4128	10.0227	1.37173	4.61603e-05
PPP1R37	ENSG00000104866	10.5092	9.02547	1.44299	4.67171e-05
UNC93B1	ENSG00000110057	10.2987	8.65304	1.58702	4.69918e-05
SNORA57	ENSG00000206597	7.5818	4.6803	2.68285	4.82136e-05
CTD-2319I12.2	ENSG00000267416	8.94303	5.05974	3.24365	4.88992e-05
ENTPD2	ENSG00000054179	9.91981	7.85296	1.93575	5.13183e-05
HTT	ENSG00000197386	11.1367	9.98105	1.13537	5.13183e-05
DCST2	ENSG00000163354	9.03503	6.80165	2.15745	5.2674e-05
DUS3L	ENSG00000141994	9.02883	7.11881	1.81337	5.40335e-05
RPL12P21	ENSG00000242683	6.4697	1.92519	3.64248	5.47563e-05
CMBL	ENSG00000164237	10.6646	9.4167	1.22186	5.49976e-05
FCHSD1	ENSG00000197948	10.0186	8.61061	1.39395	5.59468e-05
SLC12A7	ENSG00000113504	9.37854	8.24957	1.11177	5.61837e-05
BCR	ENSG00000186716	9.18685	7.67851	1.4851	5.89437e-05
SYNE4	ENSG00000181392	9.54446	8.14065	1.3699	6.17349e-05
ADM2	ENSG00000128165	9.60754	6.9906	2.40703	6.4601e-05
HR	ENSG00000168453	10.1213	8.14366	1.935	6.46919e-05
PCBP3	ENSG00000183570	9.02806	6.54633	2.37526	6.7963e-05
LPIN3	ENSG00000132793	10.4303	9.3221	1.08973	7.09241e-05
TANGO2	ENSG00000183597	9.25218	7.65311	1.55522	7.45483e-05
PSMD13	ENSG00000185627	11.6174	10.2927	1.29573	7.68647e-05
PMVK	ENSG00000163344	10.7413	8.7806	1.89341	7.70184e-05
XAB2	ENSG00000076924	10.3802	8.29367	2.00048	8.07738e-05
RN7SL832P	ENSG00000243819	8.02037	4.47929	3.05114	8.10917e-05
SRRT	ENSG00000087087	12.2071	10.9579	1.25714	8.36013e-05
SMG9	ENSG00000105771	10.5643	8.98215	1.56775	8.36636e-05
SCRN2	ENSG00000141295	10.1822	8.85059	1.29619	8.4772e-05
C19orf24	ENSG00000228300	9.83224	7.73236	1.98637	8.47976e-05
RP11-416N2.4	ENSG00000273108	6.81245	2.96613	3.33199	8.66046e-05
PHC2	ENSG00000134686	10.4217	8.48414	1.91757	8.72059e-05
STUB1	ENSG00000103266	11.4729	9.59735	1.8211	8.73952e-05
CLK3	ENSG00000179335	10.1602	9.13902	1.00736	8.80634e-05
STX4	ENSG00000103496	10.2171	9.01502	1.18072	8.90608e-05
ZNF653	ENSG00000161914	8.89627	6.26752	2.45102	9.02473e-05
DOT1L	ENSG00000104885	9.46003	7.5915	1.79181	9.41614e-05
APOPT1	ENSG00000256053	10.7875	9.60209	1.16877	9.6184e-05
SERPINB6	ENSG00000124570	10.4288	8.79268	1.60785	9.83773e-05
SCNM1	ENSG00000163156	11.484	10.3447	1.1187	9.91034e-05
RNU6-549P	ENSG00000207162	7.39933	3.07499	3.51747	0.000103279
SSNA1	ENSG00000176101	12.1362	10.6567	1.43481	0.000105529
LZTS2	ENSG00000107816	10.8741	9.85901	1.01077	0.000107458
HEXDC	ENSG00000169660	9.95387	7.8885	1.96255	0.000107464
LINC01547	ENSG00000183250	7.89677	5.93076	1.86358	0.000111553
SPPL2B	ENSG00000005206	11.3712	9.72625	1.5811	0.000111765
CCM2L	ENSG00000101331	9.25767	6.41947	2.66114	0.000112524
C1QL1	ENSG00000131094	8.82212	6.66104	2.05139	0.000113657
MAP3K14	ENSG00000006062	9.28811	7.53535	1.71994	0.000114231
NABP2	ENSG00000139579	9.89693	8.33737	1.51637	0.00011634
MED25	ENSG00000104973	9.81968	7.17588	2.4008	0.000121425
ADAT3	ENSG00000213638	7.10848	4.49543	2.39334	0.000121769
MAP1S	ENSG00000130479	9.29673	7.09223	2.14276	0.000122036
NTHL1	ENSG00000065057	9.09798	7.00633	1.99545	0.000123925
FAM173A	ENSG00000103254	10.8797	8.76599	1.97888	0.000125988
RHBDD3	ENSG00000100263	10.0978	7.8825	2.10037	0.000131202
DENND2C	ENSG00000175984	7.65256	5.8719	1.71369	0.000131202
CCDC57	ENSG00000176155	10.8175	8.93934	1.77938	0.000131491
C1orf228	ENSG00000198520	8.68889	6.60446	2.02755	0.000137984
SEMA6C	ENSG00000143434	9.87562	8.01244	1.78147	0.000139208
TIGD1	ENSG00000221944	8.98036	7.28731	1.65207	0.000140078
SERGEF	ENSG00000129158	8.82153	7.35215	1.42948	0.000146594
PKP3	ENSG00000184363	11.296	9.43756	1.76666	0.000146675
P2RX2	ENSG00000187848	10.7	9.49342	1.20412	0.000148419
RAB3B	ENSG00000169213	7.11878	3.16032	3.34028	0.00015387
SMTN	ENSG00000183963	9.80193	7.94014	1.77217	0.000154368
ANAPC2	ENSG00000176248	10.1958	8.55076	1.6151	0.000160042
VGF	ENSG00000128564	9.71944	8.40233	1.28256	0.000160646
IFT172	ENSG00000138002	9.27659	7.35604	1.81586	0.000162133
PPP1R27	ENSG00000182676	5.88951	2.09521	3.24758	0.000163589
DDX51	ENSG00000185163	9.58608	8.44781	1.11709	0.000164466
AGER	ENSG00000204305	9.7212	8.58221	1.11947	0.000166832
HYI	ENSG00000178922	9.9552	8.42723	1.50473	0.000167209
WFIKKN1	ENSG00000127578	7.23123	4.65435	2.4129	0.000168377
VAT1	ENSG00000108828	11.7331	10.2743	1.42975	0.000168422
CES2	ENSG00000172831	9.01973	6.92179	1.96505	0.000175808
MED19	ENSG00000156603	8.50612	6.20118	2.16014	0.000178186
B9D1	ENSG00000108641	8.71726	7.03538	1.64435	0.000179302
EXD3	ENSG00000187609	9.28041	6.94655	2.15689	0.000180666
GATS	ENSG00000239521	8.91903	7.67645	1.22224	0.000185787
BIN3	ENSG00000147439	9.67365	8.49975	1.13848	0.000191569
ZMAT5	ENSG00000100319	10.5298	9.16803	1.33597	0.000191934
SYCE1L	ENSG00000205078	9.2697	6.82823	2.32289	0.000196565
RP11-849F2.9	ENSG00000269947	7.57077	4.31566	2.79974	0.00020061
BEGAIN	ENSG00000183092	8.22569	5.21322	2.67118	0.000202493
NCKAP5L	ENSG00000167566	9.81043	7.95025	1.76629	0.000202664
ZNF526	ENSG00000167625	8.14968	5.81833	2.14876	0.000204746
THOP1	ENSG00000172009	10.2161	7.88431	2.14884	0.000207533
PEX14	ENSG00000142655	9.22036	7.58544	1.59411	0.000208639
GPI	ENSG00000105220	11.2718	10.2148	1.05582	0.000209823
RNF224	ENSG00000233198	7.38818	4.07536	2.90721	0.000211697
HDAC10	ENSG00000100429	8.25247	6.49206	1.69097	0.000217845
NUDCD3	ENSG00000015676	10.9557	9.4594	1.4454	0.000221278
NKAIN1	ENSG00000084628	8.89075	6.59299	2.12681	0.000223616
TUT1	ENSG00000149016	10.4488	9.06147	1.35476	0.000229378
CTD-2013N17.6	ENSG00000280332	6.72686	2.28435	3.41435	0.000229674
VIPR2	ENSG00000106018	8.35178	6.12995	2.074	0.000230283
MOCS1	ENSG00000124615	8.01831	6.17709	1.78129	0.000231144
LETM1	ENSG00000168924	9.88668	8.77248	1.09916	0.00023354
AL589743.1	ENSG00000279508	6.76565	3.19914	3.08639	0.000234218
ENTPD8	ENSG00000188833	7.57219	5.56289	1.90977	0.000236912
VPS28	ENSG00000160948	11.8239	10.7799	1.02735	0.000241473
FKBP11	ENSG00000134285	9.86728	7.55143	2.13509	0.000242175
CHKB	ENSG00000100288	10.179	9.06266	1.10618	0.000245664
DNPEP	ENSG00000123992	11.2939	10.0976	1.17133	0.000251928
ASCC2	ENSG00000100325	10.9308	9.4951	1.43859	0.000260017
CYB561A3	ENSG00000162144	9.88629	8.1159	1.71542	0.000266253
RP11-316O14.1	ENSG00000268603	7.5368	3.96803	3.08233	0.00026771
TRAF7	ENSG00000131653	12.1574	10.9606	1.17011	0.000272038
SNORA77	ENSG00000221083	7.06338	3.91025	2.72397	0.000272513
CCDC183	ENSG00000213213	8.67278	6.7004	1.89326	0.000273557
LRRC3	ENSG00000160233	8.37532	5.48755	2.71332	0.000275013
CERS4	ENSG00000090661	9.99194	8.26145	1.64679	0.000275226
ZNF768	ENSG00000169957	11.8106	10.2129	1.55398	0.000275226
COASY	ENSG00000068120	10.5525	9.08838	1.41835	0.000275565
CTB-129O4.1	ENSG00000248367	8.80737	6.62834	2.06426	0.0002764
FZR1	ENSG00000105325	9.53785	7.57481	1.88287	0.000279479
FAAP20	ENSG00000162585	9.85271	6.74099	2.67878	0.000281637
FOXP4	ENSG00000137166	10.7954	9.40502	1.36288	0.000281737
MRTO4	ENSG00000053372	10.6632	9.08397	1.52189	0.000298606
DCP1A	ENSG00000272886	10.0345	7.29303	2.43335	0.000299171
RPS23P6	ENSG00000241641	7.27404	4.31963	2.60904	0.000299771
BRMS1	ENSG00000174744	11.0844	9.55308	1.49772	0.0003011
FCHO1	ENSG00000130475	8.99148	6.97912	1.89094	0.000310506
RN7SL587P	ENSG00000240233	6.41409	1.97765	3.56507	0.000314359
KNDC1	ENSG00000171798	10.7553	8.71769	1.90836	0.000320886
ASIC3	ENSG00000213199	8.11377	6.30244	1.74743	0.000321538
FTCD	ENSG00000160282	8.94119	7.18281	1.68219	0.000324531
BAIAP2	ENSG00000175866	9.22225	7.6101	1.56557	0.000327777
ZNF408	ENSG00000175213	9.43437	7.69754	1.69513	0.00032978
CTD-2020K17.4	ENSG00000233483	7.22755	3.6941	3.07245	0.000331146
TK1	ENSG00000167900	11.6597	10.248	1.36054	0.000332173
ZNF467	ENSG00000181444	10.8301	9.55293	1.2569	0.000332469
MISP3	ENSG00000141854	10.3965	9.17815	1.21286	0.000334662
RP11-430B1.1	ENSG00000259398	6.91418	2.73881	3.109	0.000335364
ERCC2	ENSG00000104884	10.3963	8.3874	1.92947	0.000336212
SLC16A3	ENSG00000141526	9.43679	7.92917	1.46642	0.000342193
PPP1R16A	ENSG00000160972	11.0727	9.6645	1.37126	0.000343544
AC005306.3	ENSG00000267283	8.32409	6.26264	1.97229	0.000351579
PPP5C	ENSG00000011485	10.4373	8.78897	1.60367	0.000353954
SCARB1	ENSG00000073060	11.5109	10.4347	1.07977	0.000356305
BATF	ENSG00000156127	9.38335	8.17848	1.18056	0.000356836
EEFSEC	ENSG00000132394	9.74375	7.73865	1.88916	0.000357636
ERBB2	ENSG00000141736	11.8104	9.8206	1.86048	0.000361746
RP9	ENSG00000164610	11.3035	9.13821	2.00219	0.000362762
ADA	ENSG00000196839	7.6676	5.72075	1.84102	0.00036421
ZGLP1	ENSG00000220201	8.19913	6.24499	1.85348	0.000369846
ATP6AP1	ENSG00000071553	11.9446	10.2671	1.60092	0.000370812
URM1	ENSG00000167118	10.6974	9.3515	1.30597	0.000374179
POU5F1P6	ENSG00000242551	6.19691	0	3.81044	0.0003793
NUDT8	ENSG00000167799	8.94067	6.8349	1.99477	0.000389841
RP11-307P22.1	ENSG00000258445	7.01402	1.3085	3.71793	0.000391306
VAX2	ENSG00000116035	7.73124	5.2501	2.32216	0.000392471
MON1B	ENSG00000103111	11.0265	9.52428	1.45931	0.000392471
TBX2-AS1	ENSG00000267280	11.2107	9.41206	1.70636	0.000393892
BMP1	ENSG00000168487	9.20644	7.10214	1.95434	0.00039657
C1QL4	ENSG00000186897	10.2745	8.07214	2.03381	0.000418982
TMEM129	ENSG00000168936	10.4944	8.81531	1.64363	0.000424029
RNF31	ENSG00000092098	10.6685	9.37806	1.25068	0.000427751
RP11-54O7.2	ENSG00000241180	6.79627	1.87828	3.42607	0.000432102
FAM213B	ENSG00000157870	9.75105	8.3279	1.41007	0.000436731
DEF6	ENSG00000023892	9.57082	8.54969	1.01133	0.00043775
SIRT6	ENSG00000077463	10.572	9.42579	1.11863	0.00043822
OGFOD3	ENSG00000181396	9.06453	7.988	1.05207	0.000443467
SLC12A9	ENSG00000146828	10.782	9.69331	1.07843	0.00046384
LINC00173	ENSG00000196668	7.83197	6.22898	1.54987	0.000473959
POLRMT	ENSG00000099821	10.4137	8.77316	1.60865	0.000475747
CCDC149	ENSG00000181982	9.27306	7.33302	1.84064	0.000482877
GTF3C5	ENSG00000148308	11.7656	10.2274	1.49075	0.000506347
TMED1	ENSG00000099203	11.0686	9.326	1.65414	0.000510537
SLC10A3	ENSG00000126903	10.5418	9.4213	1.11254	0.000510832
MRPL4	ENSG00000105364	10.6564	9.44417	1.19211	0.000517197
CITED4	ENSG00000179862	10.5094	8.37887	1.96655	0.00051797
SSU72	ENSG00000160075	11.8427	10.8218	1.02164	0.000529328
ETNK2	ENSG00000143845	10.3688	8.88276	1.44043	0.000532126
RP11-66B24.7	ENSG00000272808	9.09306	6.94336	2.07018	0.000536988
FAM83G	ENSG00000188522	9.35984	7.79563	1.49766	0.000542659
ZBTB17	ENSG00000116809	9.63332	8.25223	1.33373	0.000543076
ROGDI	ENSG00000067836	10.8174	9.38938	1.39418	0.000550863
PLCD3	ENSG00000161714	10.8908	9.26775	1.59143	0.000554588
KCNF1	ENSG00000162975	9.26227	6.63576	2.39184	0.000557342
ZFYVE19	ENSG00000166140	10.1596	8.74839	1.38105	0.000557342
NDUFB2	ENSG00000090266	11.1539	10.1059	1.03649	0.000560108
AP2S1	ENSG00000042753	11.0371	9.90822	1.1082	0.000570518
WDR54	ENSG00000005448	9.81883	8.22425	1.56906	0.000585453
CYB561D1	ENSG00000174151	9.16393	8.11932	1.02956	0.000588653
RNU1-67P	ENSG00000207175	7.22176	3.77424	2.93659	0.000590258
RTN2	ENSG00000125744	9.9265	7.4289	2.30927	0.000598425
RNF150	ENSG00000170153	8.31352	6.36291	1.82847	0.000615867
TPRA1	ENSG00000163870	10.4488	9.07275	1.33096	0.000618921
LINC00638	ENSG00000258701	7.38908	4.00053	2.91024	0.000621718
CBFA2T3	ENSG00000129993	9.54786	8.3588	1.17277	0.000631585
GABBR1	ENSG00000204681	8.90676	7.72578	1.15055	0.000637046
CEP89	ENSG00000121289	9.02492	7.60249	1.37925	0.000642677
OPA3	ENSG00000125741	8.70483	7.14286	1.51851	0.000657877
ZNF517	ENSG00000197363	8.46758	6.22257	2.1398	0.000659008
SLC45A1	ENSG00000162426	7.24631	3.50467	3.01434	0.000673601
SLC27A1	ENSG00000130304	9.13032	7.41407	1.63403	0.000678083
SSPO	ENSG00000197558	9.72513	8.10062	1.59983	0.00068833
HIST1H1E	ENSG00000168298	6.20408	3.90758	2.12608	0.000694884
EHD1	ENSG00000110047	10.5592	9.07719	1.4327	0.000694884
JMJD4	ENSG00000081692	9.31054	7.64034	1.59957	0.000695702
GADD45G	ENSG00000130222	9.81681	8.44613	1.35671	0.000716959
ZBTB7B	ENSG00000160685	10.3271	8.72379	1.57089	0.000734596
LMF2	ENSG00000100258	10.3151	9.23881	1.05234	0.000737364
VPS37B	ENSG00000139722	10.17	8.62985	1.48537	0.000739227
ASCL2	ENSG00000183734	10.1192	8.40051	1.63506	0.000751695
CHD3	ENSG00000170004	12.1621	10.6669	1.43561	0.00076018
MED22	ENSG00000148297	9.02712	7.70262	1.29869	0.000767407
UROS	ENSG00000188690	9.80356	8.43738	1.3355	0.000768141
VWA5B2	ENSG00000145198	7.99459	4.98877	2.58998	0.000775408
KCNJ11	ENSG00000187486	8.52476	5.53506	2.68195	0.00078487
DEAF1	ENSG00000177030	9.60369	8.08108	1.47351	0.000785448
CCDC170	ENSG00000120262	10.8227	8.86399	1.82681	0.000789562
COMTD1	ENSG00000165644	8.73753	7.64338	1.0721	0.000796803
MAP7D1	ENSG00000116871	9.33589	7.76829	1.52326	0.000804503
CCDC189	ENSG00000196118	8.85053	7.50254	1.30658	0.000809246
TNFAIP2	ENSG00000185215	8.20949	6.8343	1.34081	0.000809771
RASSF7	ENSG00000099849	10.6218	8.58841	1.88623	0.000817714
ATP2A1-AS1	ENSG00000260442	9.3093	6.90136	2.18594	0.000843987
NTMT1	ENSG00000148335	9.82574	8.19481	1.547	0.000855434
PEX16	ENSG00000121680	9.06124	7.27387	1.75314	0.000884313
COQ4	ENSG00000167113	11.586	10.0381	1.49288	0.000887045
CHMP2A	ENSG00000130724	11.7657	10.6448	1.10155	0.000897374
RP11-638I2.4	ENSG00000258982	7.59017	4.46188	2.67803	0.000903233
SNORA73B	ENSG00000200087	5.61219	0.675535	3.56479	0.000910479
GOLT1A	ENSG00000174567	9.42664	8.19764	1.1995	0.000916711
LYPLA2	ENSG00000011009	10.4016	9.36379	1.02646	0.000916836
KRT81	ENSG00000205426	9.80951	8.13516	1.64605	0.00093729
PLEKHO1	ENSG00000023902	10.2689	8.3267	1.87789	0.000938418
INAFM1	ENSG00000257704	9.24399	7.97468	1.23176	0.000938894
CCER2	ENSG00000262484	8.00567	5.95819	1.90609	0.000940452
PML	ENSG00000140464	7.47214	5.90712	1.50638	0.000950846
PANX2	ENSG00000073150	8.34318	6.15733	2.0637	0.000964172
NRBP1	ENSG00000115216	11.4242	9.96063	1.46522	0.000964172
FDX2	ENSG00000267673	10.5327	8.59081	1.82218	0.0010044
FAM171A2	ENSG00000161682	9.72731	6.90739	2.42887	0.00101463
EIF4G1	ENSG00000114867	11.2726	9.96969	1.26183	0.00102089
ACTN4	ENSG00000130402	13.8505	12.6205	1.19421	0.00102119
PRR22	ENSG00000212123	8.40063	6.40988	1.92458	0.00103885
SOX12	ENSG00000177732	10.5647	9.1729	1.34015	0.00106016
HEXA	ENSG00000213614	11.0634	9.97728	1.06607	0.00106274
B3GALT6	ENSG00000176022	9.21221	7.9536	1.23949	0.00106466
CRTC1	ENSG00000105662	10.3831	8.28508	1.97864	0.00107427
TMEM91	ENSG00000142046	9.03773	7.24281	1.69572	0.00107577
COLGALT1	ENSG00000130309	10.6261	9.09418	1.49019	0.00108017
CTD-3184A7.4	ENSG00000232442	10.2344	9.13651	1.09199	0.00108537
CACFD1	ENSG00000160325	9.69143	7.60089	1.9399	0.00108656
ZFAND2B	ENSG00000158552	9.48339	8.22472	1.24324	0.00109927
PSMD3	ENSG00000108344	10.5272	9.22907	1.30009	0.00110307
ANKRD23	ENSG00000163126	8.66288	6.85088	1.71923	0.00110933
ZNF48	ENSG00000180035	9.22858	8.0087	1.18336	0.00111146
DMTN	ENSG00000158856	9.50151	7.37022	2.03472	0.00111234
NPEPL1	ENSG00000215440	11.5653	10.5343	1.02041	0.00111234
P3H3	ENSG00000110811	9.24212	6.69096	2.36868	0.00111545
GIPC1	ENSG00000123159	12.6048	11.437	1.15618	0.00119073
RP11-367H1.1	ENSG00000273113	8.61688	6.48646	2.05379	0.00120976
RBMX2	ENSG00000134597	11.838	10.5234	1.2703	0.00124214
GRWD1	ENSG00000105447	10.2847	7.91786	2.13544	0.00124405
RHOBTB2	ENSG00000008853	9.43442	7.32226	1.93762	0.0012616
PRPF31	ENSG00000105618	11.5824	10.2684	1.27129	0.00127257
VPS18	ENSG00000104142	8.52401	6.47699	1.95401	0.00127599
NAGLU	ENSG00000108784	9.3552	8.13151	1.1955	0.00128495
NDOR1	ENSG00000188566	9.08857	7.60122	1.47267	0.00129507
RP11-111M22.3	ENSG00000255135	9.79915	8.50208	1.2829	0.00129877
POLR2L	ENSG00000177700	10.2505	8.44095	1.77561	0.00130415
AMDHD2	ENSG00000162066	9.85427	8.09584	1.74622	0.00130415
KAT5	ENSG00000172977	9.83855	8.80145	1.02051	0.00131149
MAP6D1	ENSG00000180834	9.23176	7.8672	1.34798	0.00133086
LRRC27	ENSG00000148814	7.08228	5.07942	1.84795	0.00133201
CLUHP3	ENSG00000131797	8.40533	7.18374	1.19377	0.00136645
CHMP6	ENSG00000176108	9.03833	6.75672	2.10082	0.0014076
LL21NC02-1C16.1	ENSG00000273027	7.96765	6.19314	1.6804	0.00143289
C6orf106	ENSG00000196821	11.1019	10.0124	1.09104	0.00143472
WFS1	ENSG00000109501	10.5534	8.61958	1.81361	0.0014578
FAM83H	ENSG00000180921	12.1468	10.9124	1.20708	0.00146255
GDPD5	ENSG00000158555	9.15683	6.40674	2.37835	0.00146588
PTRH1	ENSG00000187024	8.71575	5.35326	2.78028	0.00147025
KCNIP3	ENSG00000115041	7.97267	5.33106	2.32465	0.0015017
VPS9D1-AS1	ENSG00000261373	9.19024	7.81611	1.33049	0.00153841
TUBGCP2	ENSG00000130640	10.6707	9.08125	1.51131	0.00155352
AC004754.3	ENSG00000269881	6.98708	4.04473	2.5148	0.00158261
GPRIN1	ENSG00000169258	8.48919	7.20816	1.2434	0.00159707
SPRYD3	ENSG00000167778	9.97624	8.38488	1.54925	0.00163555
LRWD1	ENSG00000161036	9.44337	8.36859	1.05386	0.00164563
ETV4	ENSG00000175832	8.77372	7.28225	1.45623	0.00165045
NAT10	ENSG00000135372	10.1192	8.87639	1.20623	0.00165534
AP000437.3	ENSG00000279549	7.49729	3.53439	2.95337	0.00166279
AIFM2	ENSG00000042286	9.09588	7.61783	1.44204	0.00167074
GUK1	ENSG00000143774	11.0511	9.89291	1.12568	0.001714
ITGA5	ENSG00000161638	8.56488	6.66877	1.82601	0.00177775
GTF2H4	ENSG00000213780	8.6432	7.13688	1.43807	0.00181189
VMO1	ENSG00000182853	7.92333	5.66849	2.04151	0.0018455
PPM1K	ENSG00000163644	8.99891	7.71121	1.24778	0.00185127
HDAC11	ENSG00000163517	11.0688	9.30538	1.70529	0.00188475
RGS11	ENSG00000076344	9.16068	6.77168	2.17206	0.00189163
LMBR1L	ENSG00000139636	8.82146	7.2568	1.50025	0.00191303
TMEM8A	ENSG00000129925	11.051	9.73064	1.28849	0.00191303
C19orf52	ENSG00000142444	9.6891	8.51436	1.1562	0.00191441
ZNF787	ENSG00000142409	10.1845	8.34025	1.72584	0.00196192
C19orf54	ENSG00000188493	9.5546	8.34615	1.17727	0.00199582
CCDC88B	ENSG00000168071	8.05862	5.68955	2.15968	0.00199955
NUBP2	ENSG00000095906	10.7855	9.26411	1.45226	0.0020001
SPHK2	ENSG00000063176	8.69924	6.42401	2.07518	0.00201843
PSMD1	ENSG00000173692	8.62797	7.26378	1.31447	0.0020208
B3GAT3	ENSG00000149541	11.1127	9.65709	1.40406	0.00205682
CATIP	ENSG00000158428	6.58428	2.94996	2.96494	0.00206188
AKR1A1	ENSG00000117448	10.5459	9.5137	1.01575	0.00211478
RP11-439E19.7	ENSG00000235021	6.58102	3.23776	2.80122	0.00216314
MTMR12	ENSG00000150712	8.49153	7.06004	1.36072	0.00216314
ACBD4	ENSG00000181513	9.04129	7.45612	1.50783	0.00216565
PCOLCE	ENSG00000106333	9.9777	8.41215	1.48819	0.00216565
REEP2	ENSG00000132563	8.62045	5.76411	2.42891	0.0022227
TTC21A	ENSG00000168026	7.44967	5.89116	1.48516	0.00224864
CAPN5	ENSG00000149260	9.42941	7.92547	1.46554	0.00228782
MRPS7	ENSG00000125445	10.4757	9.00796	1.47715	0.00236503
RP3-405J10.2	ENSG00000257531	6.17646	2.30353	2.86789	0.00242323
RP11-417L19.5	ENSG00000279283	6.83206	1.52905	3.14016	0.00243343
TMEM141	ENSG00000244187	11.3398	10.2758	1.03756	0.00244998
STX18	ENSG00000168818	8.9623	7.94474	1.00459	0.00250731
RP11-417L19.2	ENSG00000256955	8.08052	5.07832	2.57431	0.00251115
ALKBH4	ENSG00000160993	9.4216	8.32392	1.06384	0.00252663
RHOG	ENSG00000177105	9.07729	7.45652	1.58078	0.0025424
RAMP3	ENSG00000122679	11.1561	10.0528	1.07011	0.00254726
ABL2	ENSG00000143322	9.77969	8.03818	1.65372	0.00255144
ANKRD13B	ENSG00000198720	8.89319	7.36236	1.48646	0.00255144
ZDHHC18	ENSG00000204160	10.2879	9.25383	1.00445	0.00260259
PNKP	ENSG00000039650	9.64195	7.35889	2.06283	0.0026341
P3H1	ENSG00000117385	9.09711	7.73616	1.30632	0.00264364
STXBP2	ENSG00000076944	9.62735	8.56393	1.03995	0.00269012
KXD1	ENSG00000105700	12.4233	11.0471	1.33279	0.00271644
YDJC	ENSG00000161179	11.2902	9.81196	1.4092	0.00276019
TRAPPC6A	ENSG00000007255	10.5099	9.36292	1.15181	0.00277589
DAPK3	ENSG00000167657	9.94201	7.79195	1.94398	0.00279064
MIR125A	ENSG00000208008	4.46483	1.07532	2.77231	0.00279772
PTK7	ENSG00000112655	9.76542	8.65949	1.0819	0.00279884
ICAM3	ENSG00000076662	9.50094	7.59888	1.75414	0.00283557
TTLL12	ENSG00000100304	9.30026	7.56464	1.68514	0.00283557
PICK1	ENSG00000100151	8.40382	7.14188	1.22321	0.00283557
PQLC2	ENSG00000040487	9.49073	7.81441	1.59231	0.00285019
EBF4	ENSG00000088881	8.03505	5.82531	2.04074	0.00285631
ABCB8	ENSG00000197150	9.56065	7.87318	1.63271	0.00287096
ITPKA	ENSG00000137825	8.1269	6.26374	1.78699	0.00288112
TSPAN33	ENSG00000158457	8.3425	7.08063	1.23056	0.00288112
PPCDC	ENSG00000138621	8.23024	5.44376	2.356	0.00294145
A4GALT	ENSG00000128274	9.21715	7.72077	1.4278	0.00294654
RP11-247A12.2	ENSG00000204055	7.73959	4.46164	2.66334	0.0030123
QSOX1	ENSG00000116260	10.7435	9.59617	1.12498	0.00301609
HSD3B7	ENSG00000099377	9.83769	8.45976	1.35506	0.00304519
VASH1	ENSG00000071246	9.37233	8.07624	1.24907	0.00305107
P2RX4	ENSG00000135124	9.69451	8.05267	1.61624	0.00305399
CLPB	ENSG00000162129	9.22776	7.10416	2.0172	0.00306973
PELI3	ENSG00000174516	7.90937	5.92333	1.87211	0.00309361
TMCC2	ENSG00000133069	6.62906	4.26382	2.13783	0.00310027
RAB4B	ENSG00000167578	9.73434	8.62285	1.10069	0.00311027
NR1H3	ENSG00000025434	8.44648	6.24422	2.10566	0.00313545
ZNF417	ENSG00000173480	7.54668	5.59471	1.79675	0.00313615
SESN2	ENSG00000130766	9.88243	8.37397	1.49887	0.00320878
KIAA0319L	ENSG00000142687	10.2648	8.39661	1.8059	0.00324007
SNHG18	ENSG00000250786	8.29634	6.53852	1.65528	0.00325005
MIR940	ENSG00000260778	6.88797	4.41245	2.20557	0.00333865
GALK1	ENSG00000108479	9.8969	8.50292	1.33529	0.00335156
RPTOR	ENSG00000141564	9.32884	7.71745	1.55083	0.00336267
NRM	ENSG00000137404	11.5006	9.80515	1.66627	0.00337457
ANKS6	ENSG00000165138	9.45081	8.3398	1.10284	0.0033921
SH3BP5L	ENSG00000175137	9.80053	7.65763	1.93049	0.00339937
CACNB3	ENSG00000167535	11.2041	9.87464	1.27627	0.003412
APOE	ENSG00000130203	7.30343	4.479	2.52576	0.00342138
FAM124A	ENSG00000150510	6.54935	2.87898	2.70501	0.00343232
MED12	ENSG00000184634	9.82521	8.11444	1.61183	0.00343232
LZTR1	ENSG00000099949	10.251	8.6435	1.54513	0.00348111
RP11-49O14.2	ENSG00000236095	6.30218	2.75133	2.86622	0.00350982
NOXO1	ENSG00000196408	6.59096	2.90138	2.99671	0.00353138
MAMDC4	ENSG00000177943	8.18728	6.43037	1.64793	0.00353138
RGS12	ENSG00000159788	9.66836	8.46097	1.17152	0.00353355
HIST1H1D	ENSG00000124575	6.9019	3.03482	2.8566	0.00358252
LINC01235	ENSG00000270547	6.32293	3.50518	2.45316	0.00358252
CXXC1	ENSG00000154832	9.16061	7.94674	1.20384	0.00364206
CREB3	ENSG00000107175	9.70206	8.44554	1.22954	0.00366839
TMEM208	ENSG00000168701	11.2281	9.91675	1.28175	0.00369528
FGFR4	ENSG00000160867	8.17805	6.74449	1.38724	0.00376885
ISG15	ENSG00000187608	10.4115	8.43023	1.81962	0.00377975
PRICKLE3	ENSG00000012211	8.61872	6.62384	1.94119	0.00378919
FXR2	ENSG00000129245	9.41198	8.27731	1.11377	0.00388551
TPT1-AS1	ENSG00000170919	8.57265	5.99646	2.29278	0.00398174
DUSP8	ENSG00000184545	8.55872	6.57807	1.8454	0.00400919
SIPA1	ENSG00000213445	10.4012	8.37012	1.84088	0.00401068
CCDC127	ENSG00000164366	9.58403	8.52452	1.05539	0.00409934
TRIB3	ENSG00000101255	11.2466	10.0774	1.15929	0.00416474
FAM229A	ENSG00000225828	7.28438	5.56285	1.65505	0.00416858
C1orf167	ENSG00000215910	5.67577	1.62018	3.06944	0.00422083
PPFIA3	ENSG00000177380	8.91674	7.30334	1.56129	0.00422492
EVPL	ENSG00000167880	11.7612	10.5986	1.14323	0.00423071
NFATC4	ENSG00000100968	9.44264	8.14028	1.28699	0.00425307
ANKRD52	ENSG00000139645	9.69615	8.32894	1.31314	0.00439406
TMEM125	ENSG00000179178	8.26434	6.54112	1.60837	0.00440301
RPL23AP32	ENSG00000237887	6.334	2.92387	2.7238	0.00445426
DDX11	ENSG00000013573	9.89691	8.71455	1.1853	0.00445829
NAA38	ENSG00000183011	10.1608	9.08701	1.05085	0.00447052
TSR3	ENSG00000007520	9.68865	8.37344	1.26588	0.00459246
NACC1	ENSG00000160877	11.3725	10.2598	1.0808	0.00459426
BAIAP2L1	ENSG00000006453	10.5231	9.34029	1.1622	0.00461328
RND2	ENSG00000108830	7.65355	4.9933	2.27429	0.00463424
PNPLA7	ENSG00000130653	9.15447	7.93415	1.18064	0.00465182
CCDC24	ENSG00000159214	8.9259	7.706	1.1895	0.00469207
CTB-50L17.10	ENSG00000167674	9.96645	8.42512	1.47126	0.00471335
PRR7	ENSG00000131188	10.4315	9.02111	1.34284	0.00471612
KB-68A7.1	ENSG00000274225	7.3215	5.10582	2.01024	0.00479577
NUPR1	ENSG00000176046	9.25334	6.88719	2.06644	0.00482155
INPPL1	ENSG00000165458	12.6802	11.3845	1.24009	0.00482155
PTCD1	ENSG00000106246	9.34132	7.82757	1.48774	0.00484364
KIAA2013	ENSG00000116685	9.83514	8.57281	1.21935	0.00492956
CCND3	ENSG00000112576	10.1294	8.91483	1.17649	0.00498931
OSBPL5	ENSG00000021762	8.50753	6.99848	1.43332	0.0050159
TMEM115	ENSG00000126062	10.4041	8.68383	1.5998	0.00503391
ACAD10	ENSG00000111271	10.282	8.58578	1.57849	0.00507166
TMPRSS6	ENSG00000187045	5.43285	2.614	2.38129	0.00508814
LL21NC02-21A1.1	ENSG00000273796	7.8298	6.17709	1.55339	0.0051215
PANO1	ENSG00000274897	6.61528	4.2797	2.08799	0.00519642
TMEM234	ENSG00000160055	8.41784	7.16907	1.20085	0.0052549
MXD4	ENSG00000123933	11.4864	9.0354	2.12297	0.0052988
ADCY1	ENSG00000164742	10.2978	9.02809	1.21124	0.00534669
MUTYH	ENSG00000132781	8.68514	7.55143	1.09877	0.00535346
FBXW9	ENSG00000132004	8.16959	6.77915	1.34647	0.00538602
ZDHHC22	ENSG00000177108	8.54549	6.6324	1.82056	0.00541514
CALML6	ENSG00000169885	7.77583	5.49363	2.00283	0.00544283
SNAP47	ENSG00000143740	9.70963	8.23628	1.41387	0.00555458
ANKZF1	ENSG00000163516	9.10254	7.80337	1.29333	0.00562328
RELA	ENSG00000173039	11.1081	9.84259	1.22148	0.00563733
MARK2	ENSG00000072518	9.92113	8.81442	1.10053	0.00572029
SCRIB	ENSG00000180900	10.9952	9.77748	1.21385	0.00573391
CATSPERG	ENSG00000099338	8.76182	7.27348	1.46252	0.00578954
SYTL1	ENSG00000142765	10.7069	9.51646	1.15963	0.00581179
ZNF335	ENSG00000198026	10.0781	8.97238	1.09211	0.00581852
TMEM121	ENSG00000184986	8.12013	5.2647	2.37538	0.00590443
GPAA1	ENSG00000197858	11.1398	9.5245	1.51223	0.00590662
ARFGAP2	ENSG00000149182	11.3398	10.1291	1.16812	0.00592598
C2CD4C	ENSG00000183186	8.58139	6.31162	2.00335	0.00595883
RP11-229D13.3	ENSG00000280388	5.583	1.44903	3.00212	0.00598418
CAMTA2	ENSG00000108509	9.567	7.94959	1.51342	0.00606794
TOM1	ENSG00000100284	8.91835	7.21714	1.62018	0.00616124
PCSK7	ENSG00000160613	9.06727	7.84993	1.17172	0.00620138
CAMK2G	ENSG00000148660	9.08923	7.64166	1.36946	0.00627354
MFSD3	ENSG00000167700	8.24962	6.84737	1.33478	0.0063617
ZDHHC8	ENSG00000099904	9.22987	7.86581	1.33663	0.00649293
CTB-55O6.12	ENSG00000267169	6.84136	3.81613	2.46512	0.00656539
EIF6	ENSG00000242372	9.89446	8.81677	1.0483	0.00666931
ADAM11	ENSG00000073670	8.89588	6.08354	2.47364	0.00668822
CDPF1	ENSG00000205643	8.67007	7.21397	1.40879	0.00669391
RP11-319G9.3	ENSG00000260816	9.51366	7.56064	1.77035	0.00673126
FBXL15	ENSG00000107872	8.69598	7.40861	1.22493	0.00676423
RUSC2	ENSG00000198853	8.82707	7.45383	1.33463	0.00682676
NNT-AS1	ENSG00000248092	9.06134	7.17958	1.84594	0.00684299
ZNF142	ENSG00000115568	9.74441	8.21104	1.46251	0.00685585
KCNC3	ENSG00000131398	8.04221	6.73734	1.26237	0.00687684
WASH7P	ENSG00000226210	8.74265	7.41899	1.28961	0.0069441
CTU1	ENSG00000142544	8.08514	5.98273	1.96462	0.00694483
COQ8B	ENSG00000123815	8.49144	6.52776	1.89591	0.00694483
EXOC7	ENSG00000182473	11.4208	10.0389	1.31591	0.00704019
RANBP3	ENSG00000031823	10.146	9.07908	1.03995	0.00719284
CYHR1	ENSG00000187954	10.982	9.35814	1.52973	0.00724356
SLC46A1	ENSG00000076351	8.64728	6.59299	1.84848	0.00726246
PRMT7	ENSG00000132600	9.83235	8.06019	1.6312	0.00745782
LINC00176	ENSG00000196421	8.11835	5.74278	2.14097	0.00751022
HYPM	ENSG00000187516	6.44836	3.87649	2.27061	0.00762418
RP11-66B24.4	ENSG00000259583	6.34758	3.17243	2.60836	0.00764119
RN7SL34P	ENSG00000239868	5.94247	0.572923	2.97081	0.00764524
TOP3A	ENSG00000177302	9.33863	8.18272	1.11663	0.00768158
MTFP1	ENSG00000242114	7.54778	4.74708	2.40505	0.00771203
KRT18P37	ENSG00000253943	6.5252	3.89577	2.23983	0.00771203
SUN2	ENSG00000100242	8.78054	7.47931	1.24509	0.00786922
CHPF2	ENSG00000033100	9.75211	8.52904	1.20883	0.00788325
XIAP	ENSG00000101966	11.7789	10.0997	1.55336	0.00791079
MPDU1	ENSG00000129255	10.7871	9.52367	1.22877	0.00792445
SUSD2	ENSG00000099994	7.53656	6.23489	1.25459	0.00800077
TNNI2	ENSG00000130598	8.3702	6.06768	1.98591	0.00800692
KDM4B	ENSG00000127663	8.98422	7.80898	1.15142	0.00810419
TMEM214	ENSG00000119777	10.6019	9.4517	1.16778	0.0081322
RABGGTA	ENSG00000100949	9.11704	8.05047	1.06029	0.0081322
NCLN	ENSG00000125912	9.70387	8.3009	1.4091	0.00813339
MGAT4B	ENSG00000161013	12.276	11.1775	1.067	0.00827907
AC007969.5	ENSG00000233762	7.84606	5.6283	1.94938	0.00829074
FIS1	ENSG00000214253	10.8724	9.58998	1.23618	0.00829527
APRT	ENSG00000198931	13.0164	11.8278	1.14168	0.00831446
TMEM134	ENSG00000172663	11.4348	10.3042	1.08571	0.00838448
CDH24	ENSG00000139880	10.005	8.71668	1.2314	0.00845487
STMN3	ENSG00000197457	10.528	9.36044	1.14126	0.00856219
ZNF580	ENSG00000213015	10.0815	8.24387	1.67593	0.00867672
PER1	ENSG00000179094	9.93313	8.45923	1.42099	0.00875449
ARMC6	ENSG00000105676	9.70455	8.52095	1.185	0.00878381
WDR45	ENSG00000196998	9.43955	8.32875	1.07379	0.00894501
TBCD	ENSG00000141556	9.98211	8.57445	1.34695	0.00898399
STX5	ENSG00000162236	9.21642	8.07613	1.11304	0.00905442
IPO13	ENSG00000117408	9.70436	7.93981	1.63649	0.00923397
SUV39H1	ENSG00000101945	9.50802	7.9569	1.50449	0.00925383
NFATC1	ENSG00000131196	8.13402	6.61073	1.44192	0.00942368
CAMSAP3	ENSG00000076826	9.91886	8.38977	1.43409	0.00948134
SLC2A8	ENSG00000136856	8.77557	7.50303	1.241	0.00965198
RP11-147L13.13	ENSG00000277476	10.3004	9.25745	1.0464	0.00987228
USP36	ENSG00000055483	8.6076	6.78409	1.70289	0.00989343
C14orf79	ENSG00000140104	9.49023	7.82012	1.5461	0.0098943
ADAD2	ENSG00000140955	5.57557	1.87828	2.79532	0.00994824

## Sheet: IP vs IgG (all counts)
external_gene_name	ID	log2baseMean_CIRP	log2baseMean_IgG	log2FoldChange_CIRP_vs_IgG	padj_CIRP_vs_IgG
CRK	ENSG00000167193	12.5244	10.0794	1.71518	8.21456e-29
PKM	ENSG00000067225	14.6159	13.4002	1.12238	6.64771e-23
EGFL7	ENSG00000172889	13.4142	10.714	2.07549	1.2445e-22
SF3A2	ENSG00000104897	12.6652	10.6917	1.53814	1.53495e-21
CLDN4	ENSG00000189143	13.0116	11.323	1.5164	1.99908e-21
EDF1	ENSG00000107223	14.4042	12.8594	1.21746	4.275e-21
CYBA	ENSG00000051523	14.5092	12.4974	1.46437	1.2253e-20
MEIS3	ENSG00000105419	11.5263	9.40667	1.64596	2.29825e-19
MRPL12	ENSG00000262814	12.5293	10.3089	1.5135	3.29928e-19
PCSK1N	ENSG00000102109	13.5317	10.9865	1.5457	7.76711e-18
RPL28	ENSG00000108107	17.1796	15.1679	1.11073	2.19911e-15
ATP5D	ENSG00000099624	13.7746	11.8565	1.21701	2.62588e-15
STARD10	ENSG00000214530	15.9288	13.7134	1.09364	7.45891e-14
RPP25	ENSG00000178718	10.7696	8.73032	1.81683	4.01589e-13
SSR2	ENSG00000163479	14.5677	12.7955	1.60306	4.01589e-13
SLC35C1	ENSG00000181830	11.5544	10.1673	1.17179	6.02347e-13
P4HB	ENSG00000185624	14.5125	13.4044	1.06553	7.75426e-13
RPL27A	ENSG00000166441	16.1835	14.5277	1.45819	1.46596e-12
CALML5	ENSG00000178372	10.9602	8.97856	1.66068	1.88422e-12
TRIM28	ENSG00000130726	13.5086	12.2214	1.16722	7.28659e-12
MPG	ENSG00000103152	12.7051	10.883	1.22727	8.35064e-12
S100A11	ENSG00000163191	16.9587	15.5316	1.45919	1.55471e-11
CST3	ENSG00000101439	12.7129	11.4873	1.28232	1.7504e-11
MED16	ENSG00000175221	11.2286	8.63308	1.79999	3.46525e-11
AES	ENSG00000104964	14.4234	12.6586	1.11392	3.51043e-11
TSSC4	ENSG00000184281	10.806	8.31154	1.83628	6.44662e-11
SLC2A4RG	ENSG00000125520	13.8645	12.3175	1.09164	6.69674e-11
UBTF	ENSG00000108312	12.4686	10.9964	1.04676	8.53403e-11
BSG	ENSG00000172270	16.0092	14.422	1.04445	1.8407e-10
FOXM1	ENSG00000111206	11.8823	10.1705	1.47416	2.2595e-10
GPX3	ENSG00000211445	10.3181	8.21064	1.81819	7.29292e-10
SULT2B1	ENSG00000088002	11.4638	9.60785	1.52427	8.36288e-10
MZT2B	ENSG00000152082	14.1414	12.5859	1.03811	1.36898e-09
PRDX1	ENSG00000117450	13.1651	12.2065	1.12122	1.93882e-09
RP11-316O14.1	ENSG00000268603	7.60233	1.9784	5.48897	2.31681e-09
RNF224	ENSG00000233198	7.45368	2.31745	5.22376	3.12031e-09
PMPCA	ENSG00000165688	11.9327	10.3022	1.06738	4.97088e-09
BORCS7	ENSG00000166275	9.59416	7.17991	2.39995	6.02039e-09
RNPEPL1	ENSG00000142327	12.8919	10.362	1.59283	6.02039e-09
IFITM2	ENSG00000185201	11.7373	10.4226	1.23541	6.02039e-09
MTFP1	ENSG00000242114	7.61329	2.41543	5.32611	7.18679e-09
PACSIN3	ENSG00000165912	12.5749	10.8252	1.21165	8.17294e-09
PIGQ	ENSG00000007541	12.5997	10.38	1.28034	1.02588e-08
SCAND1	ENSG00000171222	12.2576	10.3499	1.31789	1.11276e-08
C19orf81	ENSG00000235034	11.5264	9.52199	1.4892	1.11961e-08
CTD-2020K17.4	ENSG00000233483	7.293	1.84144	5.27426	1.50972e-08
NOC2L	ENSG00000188976	12.2558	10.7249	1.36022	1.71964e-08
EPHX1	ENSG00000143819	10.5468	8.55711	2.04008	2.15729e-08
PGLS	ENSG00000130313	12.2732	10.4928	1.17365	2.69389e-08
B4GALT2	ENSG00000117411	12.4545	10.0697	1.75924	3.14062e-08
SFN	ENSG00000175793	11.6113	9.83125	1.18789	4.70831e-08
SEMA4G	ENSG00000095539	7.31127	2.6177	5.0143	5.93031e-08
MEPCE	ENSG00000146834	11.5011	9.59959	1.74361	6.16787e-08
THEMIS2	ENSG00000130775	6.98652	2.43703	4.95249	7.81341e-08
RP11-792A8.4	ENSG00000272831	10.6597	8.70653	1.67033	1.02543e-07
TPD52L2	ENSG00000101150	13.3564	11.919	1.08707	1.14257e-07
G6PD	ENSG00000160211	13.6445	11.8273	1.20563	1.23165e-07
CTD-3035D6.1	ENSG00000213315	9.5025	6.49838	2.74545	1.30546e-07
GAA	ENSG00000171298	12.7687	11.2593	1.01397	1.31377e-07
MYPOP	ENSG00000176182	6.9593	3.08002	4.79914	1.37653e-07
SNF8	ENSG00000159210	11.8053	10.3546	1.3844	1.48439e-07
MCRS1	ENSG00000187778	12.3538	10.992	1.02271	1.48578e-07
ARID5A	ENSG00000196843	10.1759	7.99556	1.63474	1.56103e-07
MAZ	ENSG00000103495	14.9542	13.364	1.13311	1.6247e-07
TXNRD2	ENSG00000184470	9.67342	7.79233	1.53708	1.66773e-07
PTPA	ENSG00000119383	14.5598	12.491	1.31382	1.74975e-07
WDR83OS	ENSG00000105583	12.2378	11.1679	1.27565	1.93477e-07
CDT1	ENSG00000167513	12.8093	10.9931	1.14416	2.00096e-07
MARCH9	ENSG00000139266	11.5703	9.90744	1.19927	2.0447e-07
NBL1	ENSG00000158747	10.8201	8.7519	1.65005	2.08293e-07
RBM42	ENSG00000126254	11.8362	10.266	1.1095	2.10505e-07
PSMD4	ENSG00000159352	13.8118	12.4358	1.04491	2.1194e-07
LLNLR-304G9.1	ENSG00000274447	7.03579	2.49079	4.84624	2.32965e-07
MST1	ENSG00000173531	6.76256	2.68335	4.73929	2.67396e-07
PWWP2B	ENSG00000171813	10.1501	8.25949	1.69959	2.75221e-07
FAM109A	ENSG00000198324	10.4139	7.78609	1.99913	2.84454e-07
KMT5C	ENSG00000133247	11.2659	9.8114	1.12202	3.13661e-07
MRPL45	ENSG00000278845	6.71066	4.08297	4.5364	3.42064e-07
FKBP8	ENSG00000105701	14.9306	12.8905	1.15529	3.75747e-07
PRR36	ENSG00000183248	12.2552	10.2965	1.26831	4.03725e-07
CHN1	ENSG00000128656	6.7876	2.56664	4.71464	4.2425e-07
MUC1	ENSG00000185499	12.6558	10.8404	1.30369	4.2425e-07
EXTL3	ENSG00000012232	9.65084	7.57828	1.79636	5.74106e-07
MRPL23	ENSG00000214026	13.1855	10.9614	1.27464	5.81475e-07
SLC35E4	ENSG00000100036	6.98503	2.59943	4.7171	6.70749e-07
TP53I11	ENSG00000175274	12.1894	10.4005	1.34191	6.71705e-07
EIF3G	ENSG00000130811	12.3088	10.6275	1.13328	6.72326e-07
MACROD1	ENSG00000133315	13.3347	11.1877	1.32503	6.72326e-07
RP11-401F2.3	ENSG00000266473	6.93809	2.23906	4.72955	7.86891e-07
PLXND1	ENSG00000004399	13.4879	11.8277	1.19202	7.94835e-07
CD276	ENSG00000103855	11.9876	10.6845	1.0348	8.93648e-07
MBOAT7	ENSG00000125505	11.8672	10.8684	1.07721	9.1732e-07
ABHD12	ENSG00000100997	12.1977	10.6531	1.31927	9.9315e-07
RP11-247A12.7	ENSG00000268707	6.85428	2.64495	4.61701	1.00854e-06
CTB-25B13.12	ENSG00000267317	10.0997	7.55836	1.61745	1.02383e-06
AGPAT2	ENSG00000169692	14.2149	11.8099	1.45443	1.04919e-06
MLST8	ENSG00000167965	11.8221	9.62514	1.46251	1.07902e-06
PCYT2	ENSG00000185813	11.6743	9.6344	1.02626	1.16461e-06
WNT7B	ENSG00000188064	10.4067	8.22978	1.70251	1.43615e-06
PRKCSH	ENSG00000130175	14.1608	12.513	1.01327	1.44706e-06
KCNH3	ENSG00000135519	8.76703	6.5356	2.07469	1.47673e-06
PRSS8	ENSG00000052344	13.0388	11.3315	1.32913	1.51112e-06
OSBPL5	ENSG00000021762	8.57324	6.47127	2.56203	1.61117e-06
ZNF750	ENSG00000141579	6.64787	2.17527	4.57325	1.89654e-06
SLC25A11	ENSG00000108528	11.3762	9.93279	1.09922	1.90149e-06
TMEM222	ENSG00000186501	11.6395	9.72627	1.2894	1.9971e-06
LINC01143	ENSG00000237751	6.67546	1.81972	4.60795	2.24548e-06
ASS1	ENSG00000130707	11.0152	10.0699	1.48722	2.74075e-06
DGKE	ENSG00000153933	5.985	3.56395	4.16024	3.4489e-06
HOMER3	ENSG00000051128	10.8351	9.09346	1.11852	3.80915e-06
SWSAP1	ENSG00000173928	6.52648	3.30939	4.32582	3.9824e-06
MGMT	ENSG00000170430	11.3354	9.73981	1.11253	4.38665e-06
RNA5SP463	ENSG00000199900	7.1098	0	4.75922	4.49285e-06
TMEM229B	ENSG00000198133	9.55155	5.76124	3.14654	4.67521e-06
CTSD	ENSG00000117984	16.0224	14.1135	1.27383	4.67521e-06
HSD17B1	ENSG00000108786	6.83428	1.98743	4.49883	5.1367e-06
E2F1	ENSG00000101412	10.1964	8.79084	1.15278	5.1367e-06
NME1	ENSG00000239672	13.3544	12.1048	1.1253	5.77702e-06
IGFBP4	ENSG00000141753	13.5717	12.3781	1.10364	5.97581e-06
SLC25A20	ENSG00000178537	6.64348	3.12708	4.31483	6.7527e-06
C15orf40	ENSG00000169609	8.1498	6.56679	2.12955	7.31437e-06
MPST	ENSG00000128309	12.8576	11.0687	1.21674	7.52355e-06
LINC00683	ENSG00000266256	6.72664	2.1588	4.43194	7.65962e-06
EID2	ENSG00000176396	6.02832	3.39474	4.09904	8.81548e-06
LRRC10B	ENSG00000204950	10.3731	8.14965	1.76384	9.73619e-06
IER5L	ENSG00000188483	14.7213	12.6358	1.21448	9.87558e-06
CATIP	ENSG00000158428	6.64949	1.58409	4.43036	1.04512e-05
RP13-1032I1.11	ENSG00000275902	8.27775	5.72006	2.34866	1.07654e-05
INTS1	ENSG00000164880	12.7081	10.7822	1.05487	1.08327e-05
MCRIP2	ENSG00000172366	11.4626	9.88198	1.09751	1.12115e-05
FGF22	ENSG00000070388	6.47998	1.70057	4.35886	1.32152e-05
FAM65C	ENSG00000042062	6.35067	3.27008	4.14753	1.38298e-05
PLCB3	ENSG00000149782	12.8321	11.0959	1.14757	1.39325e-05
SERGEF	ENSG00000129158	8.88727	7.23474	1.83611	1.43947e-05
UQCRC1	ENSG00000010256	11.9722	10.2709	1.20529	1.58008e-05
RP11-66B24.4	ENSG00000259583	6.41267	1.58075	4.33641	1.62231e-05
CARM1	ENSG00000142453	13.4769	11.6507	1.13569	1.77721e-05
FZD2	ENSG00000180340	10.0938	8.18856	1.48052	1.83842e-05
ASNSP1	ENSG00000248498	6.52912	2.73026	4.20617	1.84313e-05
AC000123.3	ENSG00000279265	6.58062	2.71042	4.22058	1.84319e-05
RN7SL587P	ENSG00000240233	6.47919	0.984098	4.38956	1.95001e-05
CHPF	ENSG00000123989	12.4157	10.4777	1.31309	1.95001e-05
ASMTL	ENSG00000169093	10.8745	9.0512	1.34061	1.96223e-05
PRDX2	ENSG00000167815	12.2018	10.8976	1.07551	2.00664e-05
C2CD4D	ENSG00000225556	6.70431	1.74062	4.33251	2.14741e-05
MISP3	ENSG00000141854	10.4624	9.05435	1.50189	2.59258e-05
MVB12A	ENSG00000141971	11.1678	9.42756	1.17403	2.63704e-05
NOXO1	ENSG00000196408	6.65605	1.71418	4.29755	2.7096e-05
RP11-529K1.2	ENSG00000261777	6.49198	2.54874	4.16691	2.74141e-05
TMEM56	ENSG00000152078	6.10171	2.91194	4.02471	3.10352e-05
TOB1-AS1	ENSG00000229980	6.32674	3.25859	4.04181	3.1372e-05
ARL2	ENSG00000213465	11.0027	9.3162	1.2807	3.18138e-05
SLC25A10	ENSG00000183048	12.3513	10.1358	1.30028	3.29157e-05
CCDC85B	ENSG00000175602	12.9591	10.3841	1.51284	3.41726e-05
SLC43A1	ENSG00000149150	10.0678	8.23892	1.35397	3.46966e-05
MAP2K2	ENSG00000126934	13.9581	11.8054	1.11474	3.57112e-05
RRAGD	ENSG00000025039	5.95831	3.05833	3.95276	3.75286e-05
C14orf80	ENSG00000185347	12.107	10.1002	1.25341	3.77549e-05
MRPL28	ENSG00000086504	12.9573	11.0579	1.27185	3.90978e-05
PLXNB2	ENSG00000196576	13.2169	11.903	1.15291	4.08404e-05
RRP1	ENSG00000160214	11.9152	10.1981	1.1083	4.11596e-05
PRPF19	ENSG00000110107	12.7483	11.1757	1.34091	4.51729e-05
RHOC	ENSG00000155366	12.5418	11.2762	1.10314	4.6798e-05
MPND	ENSG00000008382	12.4505	10.1538	1.17188	4.90736e-05
AP2A2	ENSG00000183020	11.2348	9.44009	1.4179	4.92532e-05
SLC39A3	ENSG00000141873	10.2459	8.17874	1.1465	4.94542e-05
B4GALT7	ENSG00000027847	8.67872	6.68632	2.50453	5.31771e-05
ERI3	ENSG00000117419	9.99844	9.12189	1.10009	5.31771e-05
RP11-820I16.4	ENSG00000273141	6.31932	1.60217	4.13697	5.47444e-05
CAPN10-AS1	ENSG00000260942	6.43418	2.89754	4.00395	5.81236e-05
ALDOA	ENSG00000149925	15.8635	14.5469	1.08101	5.81765e-05
PIANP	ENSG00000139200	6.39489	2.50641	4.03977	6.02258e-05
SIL1	ENSG00000120725	11.2161	9.23482	1.40194	6.03339e-05
LHX6	ENSG00000106852	6.0332	2.84908	3.92584	6.15325e-05
ZNF395	ENSG00000186918	11.1228	9.52874	1.33743	6.19488e-05
ST14	ENSG00000149418	12.5359	10.3307	1.26359	6.2396e-05
ZFPM1	ENSG00000179588	11.8259	9.90974	1.02773	6.24264e-05
CA11	ENSG00000063180	10.6488	9.0582	1.23215	6.34718e-05
HS1BP3	ENSG00000118960	10.5219	8.89634	1.18265	6.76098e-05
UQCC3	ENSG00000204922	11.2555	9.44568	1.5831	6.83498e-05
CXorf40B	ENSG00000197021	6.13084	2.97331	3.92266	6.86776e-05
WDR18	ENSG00000065268	10.1289	8.46804	1.20616	7.0725e-05
SEMA6B	ENSG00000167680	10.6809	8.22788	1.6333	8.14189e-05
RRP7A	ENSG00000189306	11.2885	9.21056	1.49653	8.54936e-05
MAP2K7	ENSG00000076984	11.3273	9.58096	1.00199	9.05214e-05
RP13-895J2.3	ENSG00000256542	6.10433	2.17742	3.95636	9.29126e-05
RP5-1014D13.2	ENSG00000279738	6.79572	1.41865	4.08792	9.58161e-05
PGAM2	ENSG00000164708	6.26761	1.57425	4.035	0.000101702
NDUFA13	ENSG00000186010	12.053	10.199	1.29986	0.000102916
STK11	ENSG00000118046	12.7119	10.7378	1.25725	0.000104561
SEZ6L2	ENSG00000174938	11.6327	10.2293	1.16928	0.000104865
SNX17	ENSG00000115234	9.42454	8.47802	1.19387	0.000112128
CLDN3	ENSG00000165215	13.037	11.8293	1.04653	0.000113977
PPP2R3A	ENSG00000073711	6.46591	3.82207	3.5902	0.000120416
RP5-1065J22.8	ENSG00000273382	9.77738	7.20656	1.47733	0.000124096
ARRDC1-AS1	ENSG00000203993	10.243	8.23085	1.37061	0.000125319
TMEM259	ENSG00000182087	10.7188	9.83106	1.07073	0.000129326
KLF16	ENSG00000129911	11.0449	8.6782	1.32067	0.000138365
MVD	ENSG00000167508	12.2917	10.2757	1.13558	0.000139167
CCM2L	ENSG00000101331	9.32344	6.34829	2.76925	0.000140147
FBXO31	ENSG00000103264	9.71057	8.29117	1.27489	0.000143055
GNB2	ENSG00000172354	12.2819	11.3368	1.09583	0.000149756
LRRC26	ENSG00000184709	10.094	7.18508	1.90157	0.000151277
TRIM27	ENSG00000204713	9.53976	8.38387	1.23862	0.000154873
C2orf81	ENSG00000159239	10.5945	8.83065	1.13077	0.000161783
RP11-438D14.2	ENSG00000259937	6.39177	2.87682	3.84573	0.000162416
BCL7C	ENSG00000099385	14.1143	11.9522	1.30091	0.000170208
CTD-3001H11.2	ENSG00000277383	6.14712	2.74508	3.81298	0.000171182
OGFR	ENSG00000060491	12.1501	10.708	1.0237	0.000171182
ICAM1	ENSG00000090339	6.16714	2.37728	3.85061	0.000173591
EPN1	ENSG00000063245	12.4684	10.4678	1.391	0.000183274
MCRIP1	ENSG00000225663	12.0526	10.1442	1.09758	0.000222635
NAA60	ENSG00000122390	11.6819	10.2838	1.05464	0.000223696
RP11-284F21.9	ENSG00000272068	10.3358	7.40889	1.27384	0.00023085
RP1-315G1.3	ENSG00000232412	6.40099	2.87338	3.77615	0.000259812
SPEF1	ENSG00000101222	6.02229	2.54017	3.73483	0.000270022
LAD1	ENSG00000159166	11.7534	10.2926	1.02558	0.000274163
SUN2	ENSG00000100242	8.98218	7.29062	1.78774	0.000282535
NFKBIL1	ENSG00000204498	10.5013	8.89487	1.13024	0.000284349
ZDHHC12	ENSG00000160446	13.4048	11.5807	1.36752	0.000286196
COQ7	ENSG00000167186	9.79013	8.59572	1.62269	0.000324139
RABL2B	ENSG00000079974	6.94321	5.40764	2.5049	0.000358074
SCARB1	ENSG00000073060	11.5768	10.4363	1.13056	0.000358074
NANOS3	ENSG00000187556	5.90612	1.77166	3.73962	0.000365479
OSCAR	ENSG00000170909	5.99076	1.76341	3.74375	0.000378035
CATSPER1	ENSG00000175294	8.75489	6.27674	1.89787	0.000384747
LAMTOR2	ENSG00000116586	11.6003	10.1187	1.23241	0.000386347
SH3BP1	ENSG00000100092	10.4464	8.8897	1.21514	0.00039595
TMEM160	ENSG00000130748	11.3182	9.40762	1.10371	0.000402377
SEMA3E	ENSG00000170381	6.29168	2.79131	3.68552	0.000404204
ZNF358	ENSG00000198816	13.1063	10.5091	1.51125	0.000404204
ARHGDIG	ENSG00000242173	10.4299	7.95121	1.6009	0.000404756
MAPK8IP1	ENSG00000121653	11.2401	9.27647	1.07387	0.000441199
TUBBP5	ENSG00000159247	7.50082	5.37458	2.50874	0.000441274
CHST8	ENSG00000124302	7.96779	5.17857	2.01543	0.000459513
ZSCAN1	ENSG00000152467	6.6729	2.65089	3.55643	0.000525623
RP11-419I17.1	ENSG00000283674	6.12799	1.70971	3.68655	0.000541207
SMIM12	ENSG00000163866	9.33474	7.5351	1.68672	0.000542311
ZMYND10	ENSG00000004838	9.25941	6.01508	2.0708	0.000547045
SYNDIG1	ENSG00000101463	5.90767	2.32025	3.60308	0.000573898
SLC25A6	ENSG00000169100	14.2685	12.8722	1.04619	0.000578466
MBD3	ENSG00000071655	12.4774	10.2895	1.24881	0.000583421
TGFB1I1	ENSG00000140682	6.28397	1.21975	3.70581	0.000598764
CTH	ENSG00000116761	5.79839	2.81764	3.5366	0.000603994
DLG3-AS1	ENSG00000231651	6.39824	1.7717	3.69671	0.000615872
LRRC75B	ENSG00000178026	10.1088	7.98907	1.55792	0.000631795
FCHSD1	ENSG00000197948	10.1151	8.75814	1.26143	0.000655656
RABAC1	ENSG00000105404	11.0603	9.2149	1.40665	0.000683892
ABCD1	ENSG00000101986	10.5317	8.26069	1.53511	0.000700956
KAZALD1	ENSG00000107821	9.4995	7.66206	1.55879	0.000716886
UBXN6	ENSG00000167671	11.3638	9.46736	1.28417	0.000717285
GPS1	ENSG00000169727	12.7047	10.9906	1.24728	0.000739863
NCAPH2	ENSG00000025770	11.2327	9.65602	1.12688	0.000746517
AC112721.2	ENSG00000222032	6.14996	1.43345	3.6526	0.000752905
SYCE3	ENSG00000217442	5.96676	2.11058	3.56394	0.000768942
CASKIN1	ENSG00000167971	10.2722	8.66565	1.07716	0.000784587
BMF	ENSG00000104081	9.55559	8.63518	1.02225	0.000807977
ZSCAN20	ENSG00000121903	6.06761	1.81972	3.60337	0.000817079
PEX11G	ENSG00000104883	8.5065	5.76422	1.94676	0.000836845
DNM2	ENSG00000079805	12.7359	11.2644	1.1014	0.00086765
C1orf167	ENSG00000215910	5.74035	0.876095	3.60973	0.000905029
ADRA2C	ENSG00000184160	11.1369	9.63029	1.08665	0.000923958
THAP3	ENSG00000041988	9.71878	7.71396	1.74683	0.000931802
HCN2	ENSG00000099822	11.8208	9.2607	1.44729	0.00100058
PODXL2	ENSG00000114631	12.5639	10.2568	1.04656	0.00110877
C5orf38	ENSG00000186493	12.3057	10.4762	1.11727	0.00115875
ZDHHC18	ENSG00000204160	10.3538	9.17775	1.19197	0.0011599
C19orf48	ENSG00000167747	11.5427	10.1191	1.04626	0.00117883
RXRB	ENSG00000204231	9.5627	8.1744	1.15742	0.00118618
ACBD4	ENSG00000181513	9.10706	7.24385	1.90565	0.00127038
RP11-54O7.17	ENSG00000272512	6.1372	2.24209	3.48854	0.00127459
RP11-257O5.2	ENSG00000279059	5.35677	2.97109	3.3204	0.00127459
INF2	ENSG00000203485	13.2956	11.5489	1.17276	0.00127459
ATP6V0E2-AS1	ENSG00000204934	6.05258	2.0428	3.49303	0.00129081
PRADC1	ENSG00000135617	10.1333	8.44518	1.19393	0.00130174
ADAD2	ENSG00000140955	5.64009	1.04288	3.50417	0.00134938
RP11-434H6.6	ENSG00000273174	5.94675	1.47662	3.49252	0.00140321
FNDC10	ENSG00000228594	12.417	10.2091	1.21259	0.00145475
CHKB	ENSG00000100288	9.11025	6.93343	1.59536	0.00146059
APOPT1	ENSG00000256053	10.8166	9.55413	1.15772	0.00146761
SPRYD3	ENSG00000167778	10.0421	8.3313	1.67188	0.00147646
ATP1A3	ENSG00000105409	5.73657	1.80414	3.43945	0.00150212
ARHGDIB	ENSG00000111348	7.97399	6.18974	2.3199	0.00153159
CCM2	ENSG00000136280	12.581	10.7682	1.05821	0.00154018
SNORA73B	ENSG00000200087	5.67665	0.335523	3.4896	0.00155548
WDR34	ENSG00000119333	14.6257	12.6837	1.10761	0.00165282
TBC1D10B	ENSG00000169221	12.1217	10.4757	1.16195	0.00166534
NAT14	ENSG00000090971	11.7301	9.64539	1.33955	0.00169497
SEPT1	ENSG00000180096	9.32076	7.26462	1.50532	0.00173402
MEIS2	ENSG00000134138	5.55379	3.31492	3.26911	0.00174513
FAM83A	ENSG00000147689	6.03698	1.88395	3.41729	0.00176069
NELFB	ENSG00000188986	11.4355	9.70051	1.07256	0.00178201
PRCAT47	ENSG00000260896	5.64823	1.39268	3.40966	0.00187994
CTC-510F12.4	ENSG00000267174	5.67251	2.21866	3.34738	0.00189014
TRAPPC1	ENSG00000170043	12.623	10.8396	1.12293	0.00194057
POU5F1P6	ENSG00000242551	6.26191	0	3.41418	0.00200787
RP11-229D13.3	ENSG00000280388	5.6475	0.721216	3.41693	0.00202111
PLAUR	ENSG00000011422	5.45971	2.71221	3.26747	0.00203808
PSMD13	ENSG00000185627	11.6918	10.4875	1.04874	0.00204515
RHCG	ENSG00000140519	5.82993	1.16681	3.40155	0.00204544
LMTK3	ENSG00000142235	12.379	10.753	1.29431	0.00208093
LPO	ENSG00000167419	6.11846	0.170903	3.40819	0.00208116
CPLX1	ENSG00000168993	7.15081	4.71731	2.42978	0.0020983
LSMEM2	ENSG00000179564	5.77168	1.08676	3.40674	0.00210818
PRR5	ENSG00000186654	8.9204	6.69827	1.32872	0.00211154
TSR3	ENSG00000007520	9.75445	8.32278	1.46109	0.00217569
PHLDA3	ENSG00000174307	12.066	10.6287	1.23533	0.00217569
SHPK	ENSG00000197417	8.17824	6.82079	1.5571	0.00221417
SORBS3	ENSG00000120896	10.4773	8.87222	1.0563	0.00226553
RP11-500C11.3	ENSG00000272269	5.99672	2.39732	3.33588	0.0022739
GPRC5C	ENSG00000170412	9.81277	7.91719	1.60713	0.00234945
AGTRAP	ENSG00000177674	10.3824	9.04703	1.0681	0.00236509
CACNA1D	ENSG00000157388	6.30831	3.02036	3.31173	0.00241033
SLC45A3	ENSG00000158715	8.571	7.33083	1.70961	0.00255782
KLHDC7A	ENSG00000179023	5.59432	2.09192	3.28253	0.00258095
UCK2	ENSG00000143179	8.2811	7.79632	1.60907	0.00261373
DPP9	ENSG00000142002	13.1655	11.016	1.12706	0.00272012
AP1B1	ENSG00000100280	12.5796	10.7817	1.11984	0.00272769
FAAP100	ENSG00000185504	10.7747	9.07137	1.28159	0.00284313
C6orf47	ENSG00000204439	9.34643	8.42502	1.06264	0.00290621
AC007040.11	ENSG00000258881	8.01676	4.82489	1.97598	0.00293196
BACE1-AS	ENSG00000278768	5.43772	3.05781	3.1595	0.00310351
ABHD14B	ENSG00000114779	10.9336	9.3454	1.25849	0.00313164
N4BP3	ENSG00000145911	12.886	10.5957	1.22256	0.00314617
LPAR2	ENSG00000064547	10.4432	8.54015	1.5398	0.00336515
GMPR2	ENSG00000100938	8.25775	7.70727	1.51653	0.00337429
CLDN9	ENSG00000213937	12.2978	10.6738	1.0747	0.00338941
CYB561D1	ENSG00000174151	9.2297	8.14303	1.02996	0.00347451
HIST1H3C	ENSG00000278272	5.78509	0.960524	3.26942	0.00350557
PEMT	ENSG00000133027	9.99545	8.2653	1.47994	0.00361891
ATP2A3	ENSG00000074370	11.9781	9.95606	1.40196	0.00362837
FARSA	ENSG00000179115	9.06773	7.86074	1.67948	0.00369527
ETV4	ENSG00000175832	8.83945	7.29555	1.48277	0.0037437
ECSIT	ENSG00000130159	10.3751	8.80035	1.25082	0.00379841
CAPNS1	ENSG00000126247	13.9011	12.457	1.14169	0.00381716
ZMAT5	ENSG00000100319	10.5957	9.29361	1.13882	0.00383351
ZNF526	ENSG00000167625	8.21533	5.94815	1.90426	0.00397607
MOSPD3	ENSG00000106330	9.58343	7.9905	1.59463	0.00406297
RP11-299H21.1	ENSG00000272902	5.41631	1.55852	3.19368	0.00410104
SRRM3	ENSG00000177679	11.2616	8.9574	1.62918	0.00412579
BAIAP2L1	ENSG00000006453	10.5889	9.32622	1.27455	0.00413883
LYPD1	ENSG00000150551	10.3526	8.96368	1.51307	0.00421964
PREB	ENSG00000138073	11.0678	9.58893	1.25357	0.00425548
BOK	ENSG00000176720	11.8032	9.55778	1.47935	0.00426826
ZNF469	ENSG00000225614	7.91477	6.04125	2.21583	0.00428773
NOMO1	ENSG00000103512	10.7539	9.34364	1.14423	0.00433074
OAZ2	ENSG00000180304	10.9959	10.1267	1.07757	0.00438669
SLC22A31	ENSG00000259803	9.38876	7.04919	1.34824	0.00441781
TMEM268	ENSG00000157693	8.46256	7.2591	1.4231	0.00444265
RP11-135L13.4	ENSG00000265263	5.97093	2.83639	3.14904	0.00445566
TNFRSF18	ENSG00000186891	10.5742	8.34704	1.42264	0.00445621
RHBDD3	ENSG00000100263	10.1813	8.10249	1.71445	0.00448342
ATG4D	ENSG00000130734	9.97654	8.49032	1.14828	0.00449399
CORO1B	ENSG00000172725	12.6615	11.0183	1.09339	0.00449676
KCP	ENSG00000135253	5.97892	0.711015	3.18551	0.00454593
PRRX2	ENSG00000167157	10.9911	8.9565	1.07899	0.0046809
MFSD12	ENSG00000161091	10.9866	8.98387	1.29597	0.00477163
IMPDH2	ENSG00000178035	12.6138	11.0377	1.04855	0.00481114
MAP3K11	ENSG00000173327	12.9113	10.5874	1.25786	0.00483919
BORCS8	ENSG00000254901	10.271	8.57548	1.12942	0.00488298
NEK8	ENSG00000160602	11.2646	8.78508	1.01283	0.004896
FAM3A	ENSG00000071889	11.8973	10.3298	1.05611	0.00490726
RP11-247I13.3	ENSG00000214093	6.04332	2.99251	3.0521	0.00499603
ORMDL2	ENSG00000123353	8.71516	7.19453	1.69839	0.00503656
MAPK11	ENSG00000185386	9.51675	7.08526	1.22802	0.00532501
GDPD5	ENSG00000158555	9.22897	6.42593	2.23658	0.00533148
RP4-550H1.7	ENSG00000277235	5.52543	1.90448	3.10842	0.00550985
GTF3C5	ENSG00000148308	11.9486	10.5145	1.1014	0.00569898
EEFSEC	ENSG00000132394	9.80956	7.85085	1.62958	0.00580755
LAMC2	ENSG00000058085	5.03412	2.89626	2.97124	0.00591399
KLHL22	ENSG00000099910	8.89968	6.81883	1.85459	0.00609287
BEGAIN	ENSG00000183092	8.4063	5.55952	2.11371	0.00613013
TMUB1	ENSG00000164897	12.3731	10.4651	1.06738	0.006205
ZNF444	ENSG00000167685	11.3626	9.65985	1.24929	0.0063101
CNIH3	ENSG00000143786	5.46067	2.22978	3.05213	0.00631019
DYRK1B	ENSG00000105204	11.724	9.87597	1.09449	0.00637657
ABHD1	ENSG00000143994	5.40075	1.94814	3.05613	0.00645087
EHBP1L1	ENSG00000173442	11.0903	9.24093	1.14033	0.00653067
WDR46	ENSG00000227057	9.16203	8.01891	1.37381	0.00653864
DGCR2	ENSG00000070413	10.2375	9.29404	1.00388	0.00672062
C7orf50	ENSG00000146540	11.9963	10.2658	1.07224	0.00672062
RASGEF1C	ENSG00000146090	7.78227	5.09997	1.88674	0.00721532
SHC2	ENSG00000129946	10.489	8.36367	1.46553	0.00726594
SIRT2	ENSG00000068903	8.67676	7.50024	1.47216	0.00733136
LRRC23	ENSG00000010626	10.0883	7.58867	1.61879	0.0073335
ELP5	ENSG00000170291	10.3292	9.19332	1.2119	0.00748087
FAM53B	ENSG00000189319	10.8094	8.75811	1.31628	0.00760482
VPS25	ENSG00000131475	9.40224	8.52982	1.34494	0.00763653
EXOC3	ENSG00000180104	9.73772	8.52465	1.25557	0.00784953
FOXP4	ENSG00000137166	10.8781	9.53969	1.1555	0.00790443
PALM	ENSG00000099864	12.6517	10.2242	1.33422	0.00795232
CRLF1	ENSG00000006016	10.9852	9.34636	1.21721	0.00826354
ATAD3A	ENSG00000197785	11.1122	9.14598	1.17971	0.00846978
RP11-307P22.1	ENSG00000258445	7.0794	1.5044	2.96607	0.00868786
VAT1	ENSG00000108828	11.7989	10.4309	1.13327	0.00868786
WNT3A	ENSG00000154342	5.48291	0.608606	2.98885	0.00882927
LIMD2	ENSG00000136490	10.6917	9.05187	1.10178	0.0088682
RN7SL233P	ENSG00000242971	7.87824	4.63482	2.32925	0.00890664
ZNF219	ENSG00000165804	10.4386	8.35811	1.55303	0.00901446
MATK	ENSG00000007264	11.103	8.62442	1.3522	0.00906656
MGAT1	ENSG00000131446	11.3245	9.729	1.19042	0.00913232
SURF6	ENSG00000148296	10.1591	9.32613	1.07754	0.0094169
ALKBH4	ENSG00000160993	9.48739	8.34349	1.06562	0.0095379
KCNIP3	ENSG00000115041	8.39846	5.80315	2.00072	0.00959581
CASC4	ENSG00000166734	8.30448	7.95653	1.0705	0.00970542
GCAT	ENSG00000100116	10.1498	8.32115	1.33686	0.00974863
PPP5C	ENSG00000011485	10.5031	9.07601	1.24987	0.00979346

## Sheet: IP vs IgG (last 3 exons)
external_gene_name	ID	log2baseMean_CIRP	log2baseMean_UA	log2FoldChange_CIRP_vs_IgG	padj_CIRP_vs_IgG
RP11-316O14.1	ENSG00000268603	7.5368	1.98401	5.61625	2.71713e-09
MTFP1	ENSG00000242114	7.54778	2.37354	5.44638	9.67808e-09
CTD-2020K17.4	ENSG00000233483	7.22755	1.84705	5.40613	1.63319e-08
RNF224	ENSG00000233198	7.38818	2.32882	5.31235	3.50319e-09
SEMA4G	ENSG00000095539	7.24581	2.62367	5.13514	6.25171e-08
THEMIS2	ENSG00000130775	6.92117	2.44292	5.09766	5.98587e-08
ITPR2	ENSG00000123104	6.97754	3.23107	5.08296	2.20456e-08
LLNLR-304G9.1	ENSG00000274447	6.97043	2.49665	4.99744	1.74586e-07
MYPOP	ENSG00000176182	6.89398	3.08602	4.94175	1.05242e-07
RNA5SP463	ENSG00000199900	7.04441	0	4.92395	4.70705e-06
MST1	ENSG00000173531	6.69729	2.50002	4.88773	2.53183e-07
RP11-401F2.3	ENSG00000266473	6.87277	2.24483	4.88488	6.14931e-07
CHN1	ENSG00000128656	6.72233	2.56712	4.86985	2.91163e-07
EXOC3	ENSG00000180104	6.98236	3.3924	4.82637	3.44306e-07
MORN1	ENSG00000116151	6.5966	1.92445	4.78453	1.26864e-06
RP11-247A12.7	ENSG00000268707	6.78898	2.65092	4.75696	8.55802e-07
ZNF750	ENSG00000141579	6.58266	2.18109	4.73455	1.34925e-06
CATIP	ENSG00000158428	6.58428	1.47498	4.68426	4.86821e-06
MRPL45	ENSG00000278845	6.64549	4.08617	4.63732	3.73186e-07
HSD17B1	ENSG00000108786	6.76899	1.97314	4.62377	5.39179e-06
LINC00683	ENSG00000266256	6.66145	2.16457	4.58717	6.25017e-06
RN7SL587P	ENSG00000240233	6.41409	0.988823	4.54546	1.76347e-05
LINC01143	ENSG00000237751	6.61023	1.65613	4.52885	1.2201e-05
FGF22	ENSG00000070388	6.41485	1.70618	4.52317	9.88242e-06
RP11-66B24.4	ENSG00000259583	6.34758	1.58622	4.50592	1.20053e-05
C17orf75	ENSG00000108666	6.24167	3.57043	4.48332	8.8486e-07
C2CD4D	ENSG00000225556	6.63917	1.74624	4.47687	2.03853e-05
SWSAP1	ENSG00000173928	6.46138	3.31542	4.46819	3.06077e-06
NOXO1	ENSG00000196408	6.59096	1.45069	4.46622	2.68234e-05
SLC25A20	ENSG00000178537	6.57834	3.13309	4.45974	5.48556e-06
CKMT1B	ENSG00000237289	6.34023	2.2346	4.40584	1.30861e-05
AC000123.3	ENSG00000279265	6.5155	2.71638	4.37564	1.46168e-05
RP11-529K1.2	ENSG00000261777	6.4269	2.34371	4.34958	2.1922e-05
RP11-820I16.4	ENSG00000273141	6.2543	1.6075	4.31244	4.06148e-05
DGKE	ENSG00000153933	5.92017	3.48176	4.26308	3.56219e-06
EID2	ENSG00000176396	5.96347	3.40078	4.2336	6.2716e-06
PIANP	ENSG00000139200	6.32987	2.51233	4.20176	4.61998e-05
PGAM2	ENSG00000164708	6.20264	1.57975	4.20055	8.17907e-05
TMEM56	ENSG00000152078	6.0368	2.91794	4.18801	1.99714e-05
CAPN10-AS1	ENSG00000260942	6.36914	2.90354	4.15609	4.6477e-05
RP13-895J2.3	ENSG00000256542	6.03943	2.18323	4.14206	5.86628e-05
CRAT	ENSG00000095321	6.00912	1.77722	4.12567	8.97956e-05
RRAGD	ENSG00000025039	5.89351	3.04867	4.11338	2.46377e-05
LHX6	ENSG00000106852	5.96835	2.85504	4.10385	3.68193e-05
ICAM1	ENSG00000090339	6.10226	2.38315	4.02353	0.000126641
RP11-438D14.2	ENSG00000259937	6.32681	2.88281	4.00163	0.000132653
PYGM	ENSG00000068976	6.45718	2.12496	3.99594	0.000250079
CTD-3001H11.2	ENSG00000277383	6.08227	2.75104	3.98019	0.000125929
CXorf40B	ENSG00000197021	5.75757	2.93663	3.93973	8.43173e-05
RP1-315G1.3	ENSG00000232412	6.3361	2.87935	3.93774	0.00020615
NANOS3	ENSG00000187556	5.84136	1.77722	3.93388	0.000237895
OSCAR	ENSG00000170909	5.92595	1.76888	3.93383	0.000256293
SPEF1	ENSG00000101222	5.95748	2.53124	3.90401	0.000194551
TGFB1I1	ENSG00000140682	6.21901	1.22404	3.87621	0.000505965
DLG3-AS1	ENSG00000231651	6.33352	1.77713	3.84877	0.000575383
AC112721.2	ENSG00000222032	6.08531	1.43886	3.80361	0.000709405
SYNDIG1	ENSG00000101463	5.84294	2.32614	3.78361	0.000396687
C1orf167	ENSG00000215910	5.67577	0.810091	3.7828	0.000780777
SLC16A10	ENSG00000112394	6.15017	2.91484	3.76276	0.000288698
SYCE3	ENSG00000217442	5.90195	2.11621	3.75862	0.000512687
TUBGCP3	ENSG00000126216	5.55175	3.5582	3.74104	0.000160297
TCF12	ENSG00000140262	5.50111	3.11702	3.71538	0.000235588
CTH	ENSG00000116761	5.73379	2.81892	3.71232	0.000413211
ADAD2	ENSG00000140955	5.57557	0.939142	3.69549	0.00105559
FAM83A	ENSG00000147689	5.97226	1.74233	3.68755	0.00098348
SNORA73B	ENSG00000200087	5.61219	0.337767	3.67321	0.00132531
PPP2R3A	ENSG00000073711	6.4008	3.80484	3.66745	0.00010504
ATP6V0E2-AS1	ENSG00000204934	5.98799	2.03525	3.65785	0.00108306
RP11-54O7.17	ENSG00000272512	6.07256	2.24786	3.65436	0.00105456
RP11-434H6.6	ENSG00000273174	5.88213	1.48211	3.65386	0.00121811
POU5F1P6	ENSG00000242551	6.19691	0	3.61481	0.00166195
RP11-229D13.3	ENSG00000280388	5.583	0.724517	3.60478	0.00162044
PRCAT47	ENSG00000260896	5.58375	1.39795	3.59489	0.00142722
RHCG	ENSG00000140519	5.76524	1.17109	3.58921	0.00158575
HMMR	ENSG00000072571	5.81861	2.7655	3.57454	0.00101994
ATP1A3	ENSG00000105409	5.67202	1.72287	3.56924	0.00145768
LSMEM2	ENSG00000179564	5.70744	1.09164	3.56452	0.00191947
CTC-510F12.4	ENSG00000267174	5.60797	2.22452	3.53461	0.00130992
RP11-500C11.3	ENSG00000272269	5.9322	2.40316	3.5047	0.00184093
RP11-257O5.2	ENSG00000279059	5.29254	2.97708	3.49387	0.000831497
KLHDC7A	ENSG00000179023	5.52987	2.09772	3.47345	0.00181123
LRRC75A-AS1	ENSG00000175061	6.09601	2.40322	3.44766	0.00217968
HIST1H3C	ENSG00000278272	5.72109	0.964421	3.42575	0.00330786
MIR762HG	ENSG00000260083	5.29254	2.81891	3.42469	0.00133437
CCDC136	ENSG00000128596	5.76355	2.16613	3.42232	0.0025943
DCDC2	ENSG00000146038	6.0195	3.86991	3.40794	0.00178277
ASNSP1	ENSG00000248498	5.87267	2.69611	3.40297	0.00255203
RP11-299H21.1	ENSG00000272902	5.35201	1.56395	3.39459	0.00290475
FAM86EP	ENSG00000251669	5.43169	2.57596	3.35168	0.00254736
PTOV1-AS2	ENSG00000269352	5.48514	2.18567	3.33385	0.00336344
PSMB10	ENSG00000205220	5.62313	2.09929	3.32977	0.00361754
BACE1-AS	ENSG00000278768	5.37357	3.06381	3.32896	0.00224357
RP11-135L13.4	ENSG00000265263	5.90662	2.84236	3.30953	0.00379103
RP4-550H1.7	ENSG00000277235	5.46123	1.91011	3.29067	0.00440451
TAF1B	ENSG00000115750	5.30828	3.08075	3.28366	0.00265764
ABHD1	ENSG00000143994	5.33659	1.84705	3.26501	0.00468571
WNT3A	ENSG00000154342	5.41873	0.610895	3.16686	0.0078529
RP11-247I13.3	ENSG00000214093	5.97879	3.01642	3.12262	0.00540471
AC009133.22	ENSG00000277669	4.99989	0.566898	3.10379	0.00953756
RP5-965G21.4	ENSG00000274414	5.12844	1.65664	3.08215	0.0093029
FNDC5	ENSG00000160097	5.24076	1.71425	3.07675	0.00940004
PRH1	ENSG00000231887	5.23232	3.47545	2.9366	0.00478783
CCM2L	ENSG00000101331	9.25767	6.37615	2.69867	0.000235588
CTD-3035D6.1	ENSG00000213315	9.4367	6.53084	2.64399	4.72557e-07
OSBPL5	ENSG00000021762	8.50753	6.41697	2.4801	1.85158e-06
TUBBP5	ENSG00000159247	7.43531	5.40631	2.43948	0.000614588
CPLX1	ENSG00000168993	7.08541	4.74853	2.38288	0.00210312
BORCS7	ENSG00000166275	9.57881	7.21248	2.34032	3.46105e-08
CAMK1	ENSG00000134072	7.69405	5.76121	2.31009	0.00398242
FARSA	ENSG00000179115	9.00197	7.323	2.26801	0.00111046
RP13-1032I1.11	ENSG00000275902	8.21208	5.75225	2.26451	9.07335e-06
ARHGDIB	ENSG00000111348	7.9084	6.22191	2.24549	0.00226828
CATSPER1	ENSG00000175294	8.51887	5.98392	2.17614	0.000141205
GDPD5	ENSG00000158555	9.15683	6.41391	2.15892	0.00897862
ZNF469	ENSG00000225614	7.84917	6.07333	2.13745	0.00689973
GCDH	ENSG00000105607	7.80579	6.2343	2.08286	0.000359252
ZNF414	ENSG00000133250	8.25677	5.73174	2.04039	0.00321884
BBS9	ENSG00000122507	7.4159	6.50409	2.00972	0.00215813
GTF2H4	ENSG00000213780	8.6432	6.84384	1.98753	3.42648e-05
ACBD4	ENSG00000181513	9.04129	7.17899	1.98005	0.000103907
ZMYND10	ENSG00000004838	9.19363	5.97554	1.9633	0.0016578
EGFL7	ENSG00000172889	13.3483	10.7309	1.95778	7.90093e-20
EPHX1	ENSG00000143819	10.4809	8.56958	1.93534	3.51733e-08
CHST8	ENSG00000124302	7.90217	5.18274	1.92965	0.000448074
FAM109A	ENSG00000198324	10.3481	7.80284	1.92394	4.32092e-07
PRMT5	ENSG00000100462	7.15502	6.22894	1.89538	0.00956395
AC007040.11	ENSG00000258881	7.95113	4.8568	1.89435	0.00355905
KCNH3	ENSG00000135519	8.61566	6.5206	1.88988	1.67487e-05
MED16	ENSG00000175221	11.1435	8.48216	1.88054	3.41397e-16
RUBCN	ENSG00000145016	8.51142	7.30148	1.87392	0.000808988
PEX11G	ENSG00000104883	8.44081	5.79655	1.85478	0.00123571
ZNF526	ENSG00000167625	8.14968	5.98041	1.82393	0.00478783
LRRC26	ENSG00000184709	10.0282	7.21769	1.8029	0.000272522
EXTL3	ENSG00000012232	9.55067	7.54736	1.73998	3.67779e-07
SERGEF	ENSG00000129158	8.82153	7.19042	1.73666	1.38986e-05
TSSC4	ENSG00000184281	10.7402	8.3159	1.72671	6.92196e-11
RPP25	ENSG00000178718	10.7037	8.76305	1.7055	3.17859e-13
KAZALD1	ENSG00000107821	9.43371	7.44905	1.70539	0.000355391
GPX3	ENSG00000211445	10.2523	8.24335	1.70431	5.89957e-09
MEIS3	ENSG00000105419	11.4213	9.2326	1.66326	1.25047e-19
MEPCE	ENSG00000146834	11.426	9.60503	1.6569	5.43617e-08
LRRC10B	ENSG00000204950	10.3073	8.18235	1.65432	3.03576e-05
THAP3	ENSG00000041988	9.65298	7.74107	1.65061	0.00154349
B4GALT2	ENSG00000117411	12.3887	10.0986	1.64987	1.05242e-07
TXNRD2	ENSG00000184470	9.49735	7.52292	1.63828	1.73585e-07
UCK2	ENSG00000143179	8.21544	7.71146	1.63779	0.00375996
ORMDL2	ENSG00000123353	8.64944	7.22704	1.60858	0.00742297
ASS1	ENSG00000130707	10.9442	9.9532	1.60644	6.75288e-09
RHBDD3	ENSG00000100263	10.0978	8.10304	1.60497	0.00986081
LRRC23	ENSG00000010626	9.91407	7.35162	1.59978	0.00224357
CRK	ENSG00000167193	12.4585	10.1122	1.5988	1.92065e-28
WNT7B	ENSG00000188064	10.3409	8.26156	1.59634	2.28389e-06
PWWP2B	ENSG00000171813	10.0843	8.29219	1.59226	3.05633e-07
NDUFS7	ENSG00000115286	10.1916	8.10872	1.57833	0.00136136
SPRYD3	ENSG00000167778	9.97624	8.35707	1.57169	0.00292601
SUN2	ENSG00000100242	8.78054	7.29799	1.55918	0.00147451
RP11-792A8.4	ENSG00000272831	10.5939	8.73926	1.55637	7.13301e-07
CALML5	ENSG00000178372	10.8943	9.0113	1.54563	1.21729e-11
NBL1	ENSG00000158747	10.7542	8.78464	1.53541	1.41291e-06
EEFSEC	ENSG00000132394	9.74375	7.87947	1.53515	0.00994149
SRRM3	ENSG00000177679	11.1953	8.98905	1.53073	0.00793902
ARID5A	ENSG00000196843	10.11	8.02364	1.52576	1.45711e-07
PEMT	ENSG00000133027	9.92963	8.15861	1.51908	0.00251869
GMPR2	ENSG00000100938	8.19208	7.64311	1.50499	0.00199332
CTB-25B13.12	ENSG00000267317	10.0339	7.59103	1.50354	5.62796e-06
SSR2	ENSG00000163479	14.5018	12.8259	1.48692	1.12974e-11
RNPEPL1	ENSG00000142327	12.8036	10.3607	1.48025	8.24985e-09
UQCC3	ENSG00000204922	11.1896	9.47844	1.47727	0.000159416
SEMA6B	ENSG00000167680	10.5591	8.24529	1.47566	0.000408795
ABCD1	ENSG00000101986	10.3644	8.15695	1.47131	0.00361558
LRRC75B	ENSG00000178026	10.043	7.99253	1.45471	0.00121953
ARHGDIG	ENSG00000242173	10.3213	7.93098	1.45127	0.00288788
SF3A2	ENSG00000104897	12.5906	10.6741	1.4453	1.4204e-20
AP2A2	ENSG00000183020	10.9343	9.24198	1.44416	0.000311315
SULT2B1	ENSG00000088002	11.3979	9.59881	1.43914	1.20463e-09
LPAR2	ENSG00000064547	10.3774	8.56785	1.437	0.00686712
PCSK1N	ENSG00000102109	13.4658	11.0187	1.43094	7.48407e-18
LYPD1	ENSG00000150551	10.2868	8.99426	1.41259	0.00806597
ZNF358	ENSG00000198816	13.0404	10.5418	1.40627	0.0010306
ANO10	ENSG00000160746	9.72763	8.14742	1.40618	0.00022403
CCDC85B	ENSG00000175602	12.8932	10.4169	1.40524	9.72469e-05
CLDN4	ENSG00000189143	12.9457	11.3558	1.39849	1.30839e-18
FOXM1	ENSG00000111206	11.8069	10.1726	1.39242	1.36819e-08
EPS15L1	ENSG00000127527	9.36097	8.39471	1.39092	0.00250918
MISP3	ENSG00000141854	10.3965	9.08709	1.39027	8.86108e-05
RRP7A	ENSG00000189306	11.2227	9.22865	1.38925	0.000217886
SHPK	ENSG00000197417	8.11259	7.02346	1.38749	0.00206033
ATP2A3	ENSG00000074370	11.8981	9.92203	1.38482	0.00179709
SIL1	ENSG00000120725	11.1408	9.17479	1.38282	0.000493567
ETV4	ENSG00000175832	8.77372	7.32126	1.37868	0.00697943
BOK	ENSG00000176720	11.7374	9.59055	1.37757	0.00897862
C19orf81	ENSG00000235034	11.4605	9.55475	1.37742	1.9336e-08
CYBA	ENSG00000051523	14.4217	12.4375	1.37559	1.36785e-16
FZD2	ENSG00000180340	10.028	8.22127	1.37079	3.503e-05
ST6GALNAC6	ENSG00000160408	11.8353	9.723	1.36923	1.58262e-05
RP5-1065J22.8	ENSG00000273382	9.71158	7.2392	1.36737	0.000336319
TNFRSF18	ENSG00000186891	10.4785	8.33245	1.36708	0.00573006
CIC	ENSG00000079432	9.24938	8.06663	1.36671	0.00101648
CUX1	ENSG00000257923	12.0372	10.2668	1.36237	1.26556e-10
TSR3	ENSG00000007520	9.68865	8.33239	1.35597	0.00462875
MRPL12	ENSG00000262814	12.6142	10.6188	1.35074	1.65271e-25
KCNC3	ENSG00000131398	8.04221	6.69396	1.34377	0.00878979
AGPAT2	ENSG00000169692	14.149	11.8283	1.34298	4.83914e-06
HCN2	ENSG00000099822	11.7549	9.27624	1.3409	0.00252898
RPL27A	ENSG00000166441	16.1146	14.5546	1.34015	2.24808e-10
S100A11	ENSG00000163191	16.8928	15.5644	1.33944	3.20788e-09
SLC43A1	ENSG00000149150	10.002	8.20261	1.33847	0.000275272
GALK1	ENSG00000108479	9.8969	8.4722	1.33331	0.00707769
MLST8	ENSG00000167965	11.7324	9.62085	1.3243	2.91303e-05
MACROD1	ENSG00000133315	13.2287	10.975	1.31196	1.76063e-06
SNX17	ENSG00000115234	9.32378	8.36017	1.29977	2.0874e-05
ASMTL	ENSG00000169093	10.7886	8.92375	1.29517	4.15869e-05
NOC2L	ENSG00000188976	12.1838	10.6535	1.29147	9.73354e-10
SNF8	ENSG00000159210	11.7318	10.366	1.28874	4.99947e-08
TEN1	ENSG00000257949	10.6081	8.67328	1.27037	0.00291157
ZDHHC12	ENSG00000160446	13.3389	11.5818	1.26701	0.000707969
RABAC1	ENSG00000105404	10.9661	9.20418	1.26466	0.00166229
NAT14	ENSG00000090971	11.6642	9.63871	1.2634	0.00570212
PRPF19	ENSG00000110107	12.6824	11.1842	1.26135	0.000139869
ARRDC1-AS1	ENSG00000203993	10.1771	8.26356	1.26081	0.000254493
WDR18	ENSG00000065268	10.0163	8.22151	1.2604	0.000696215
MRPL28	ENSG00000086504	12.8407	10.9063	1.24322	0.000385877
GRAMD1A	ENSG00000089351	10.5761	8.96356	1.23726	0.00460189
MUC1	ENSG00000185499	12.5899	10.8696	1.23108	1.46915e-06
ZNF395	ENSG00000186918	11.0569	9.5615	1.22143	0.000326746
PTPA	ENSG00000119383	14.4924	12.5122	1.21995	2.45059e-07
PRSS8	ENSG00000052344	12.973	11.3631	1.21628	6.83644e-06
CA11	ENSG00000063180	10.583	8.87395	1.21442	0.000235686
KLF16	ENSG00000129911	10.979	8.71094	1.21138	0.000312769
GABBR1	ENSG00000204681	8.90676	7.6971	1.21073	0.000905561
MAPK11	ENSG00000185386	9.45096	7.07815	1.20906	0.00128248
SCAND1	ENSG00000171222	12.1917	10.3827	1.20401	2.69053e-08
ABHD12	ENSG00000100997	12.1102	10.6644	1.20327	1.80266e-05
CHPF	ENSG00000123989	12.3498	10.5096	1.20234	5.85274e-05
LAMTOR2	ENSG00000116586	11.5344	10.0461	1.20022	0.000735423
KAT5	ENSG00000172977	9.83855	8.70352	1.19993	0.000324438
TMEM222	ENSG00000186501	11.5611	9.73671	1.19979	9.73558e-07
CST3	ENSG00000101439	12.6369	11.4709	1.19761	7.45499e-13
ATP5D	ENSG00000099624	13.621	11.6453	1.19277	2.4063e-21
PIGQ	ENSG00000007541	12.5338	10.3795	1.19238	7.34886e-08
UQCRC1	ENSG00000010256	11.9063	10.2139	1.19025	4.63522e-05
SLC25A10	ENSG00000183048	12.2854	10.1682	1.18852	0.000119149
STK11	ENSG00000118046	12.6094	10.5867	1.18169	0.000322017
ST14	ENSG00000149418	12.4663	10.3323	1.17921	0.000108976
LMTK3	ENSG00000142235	12.3102	10.7816	1.17562	0.00798275
ARL2	ENSG00000213465	10.9467	9.34719	1.17553	8.03518e-05
PACSIN3	ENSG00000165912	12.5046	10.7738	1.17304	6.56408e-07
UBXN6	ENSG00000167671	11.2979	9.48592	1.17141	0.00232508
WDR83OS	ENSG00000105583	12.165	11.189	1.17073	3.20017e-06
BAIAP2L1	ENSG00000006453	10.5231	9.32648	1.16786	0.0088009
FCHSD1	ENSG00000197948	10.0186	8.72636	1.16705	0.00224357
PRR36	ENSG00000183248	12.1894	10.3248	1.16392	1.08981e-06
RP11-284F21.9	ENSG00000272068	10.2699	7.44154	1.16118	0.000729951
CTSD	ENSG00000117984	15.9635	14.1601	1.16099	1.75194e-05
ABHD14B	ENSG00000114779	10.8677	9.37656	1.15067	0.00706617
SH3BP1	ENSG00000100092	10.347	8.78828	1.14658	0.00252898
PLXND1	ENSG00000004399	13.4097	11.7783	1.14472	8.45809e-07
GPS1	ENSG00000169727	12.6335	10.9947	1.14388	0.0019374
PLXNB2	ENSG00000196576	13.1017	11.6633	1.1436	1.5865e-05
ECSIT	ENSG00000130159	10.3093	8.79646	1.14292	0.008047
G6PD	ENSG00000160211	13.5634	11.7763	1.13962	3.81397e-07
MBD3	ENSG00000071655	12.4115	10.3204	1.13954	0.00158575
MVB12A	ENSG00000141971	11.0856	9.32178	1.13685	0.000375814
MPST	ENSG00000128309	12.7917	11.0728	1.13517	9.89061e-05
PHLDA3	ENSG00000174307	11.9888	10.6329	1.13326	0.00561133
C14orf80	ENSG00000185347	11.9692	9.99966	1.13056	3.50095e-05
EIF3G	ENSG00000130811	12.1384	10.3281	1.12848	8.77145e-06
NELFB	ENSG00000188986	11.3697	9.60102	1.12442	0.00181517
N4BP3	ENSG00000145911	12.8166	10.6121	1.12407	0.00599653
HECTD3	ENSG00000126107	8.60342	8.00828	1.12393	0.00103842
FOXP4	ENSG00000137166	10.7954	9.51519	1.12365	0.00735643
NCAPH2	ENSG00000025770	11.078	9.33089	1.12365	0.000617428
NAA38	ENSG00000183011	10.1608	9.04966	1.12269	0.00460864
IFITM2	ENSG00000185201	11.6715	10.4526	1.11995	2.38613e-08
MPND	ENSG00000008382	12.3195	9.96285	1.11861	2.20586e-05
TRIM28	ENSG00000130726	13.4235	12.1521	1.11365	1.48602e-11
TRIM27	ENSG00000204713	9.18292	8.20124	1.11205	0.00798275
INTS1	ENSG00000164880	12.6182	10.4581	1.11183	5.77946e-05
MPG	ENSG00000103152	12.6393	10.9156	1.10997	1.97876e-10
EDF1	ENSG00000107223	14.3344	12.8736	1.10586	2.66254e-17
FBXO31	ENSG00000103264	9.58696	8.3165	1.10567	0.000187144
FNDC10	ENSG00000228594	12.3511	10.2419	1.10403	0.00357861
IER5L	ENSG00000188483	14.6555	12.6686	1.10211	3.89015e-05
INF2	ENSG00000203485	13.2145	11.4425	1.10187	0.00146935
NUDT14	ENSG00000183828	10.4003	8.44609	1.10149	0.00917983
CLN6	ENSG00000128973	12.7617	10.7635	1.08506	1.03356e-05
MARCH9	ENSG00000139266	11.5044	9.93868	1.08342	1.39223e-06
ZDHHC18	ENSG00000204160	10.2879	9.20857	1.08282	0.00230554
PRADC1	ENSG00000135617	10.0674	8.4779	1.08217	0.00299025
SFN	ENSG00000175793	11.5454	9.86402	1.07303	1.4572e-07
CDT1	ENSG00000167513	12.7434	10.9826	1.07123	2.67576e-08
RPL28	ENSG00000108107	16.9589	14.8681	1.06668	7.53172e-12
NOMO1	ENSG00000103512	10.6881	9.34812	1.06128	0.00922011
TBC1D10B	ENSG00000169221	12.0558	10.5009	1.06044	0.00341678
NFKBIL1	ENSG00000204498	10.4354	8.90277	1.05771	0.000457887
RRP1	ENSG00000160214	11.8358	10.1193	1.05669	7.23216e-05
MVD	ENSG00000167508	12.2035	10.2484	1.05614	3.14896e-05
LAD1	ENSG00000159166	11.6601	10.178	1.05518	0.000135508
SLC35C1	ENSG00000181830	11.4885	10.2001	1.05517	8.11174e-13
CAPNS1	ENSG00000126247	13.8352	12.4687	1.05396	0.00916904
PLCB3	ENSG00000149782	12.7186	11.0276	1.05288	5.87322e-05
PKM	ENSG00000067225	14.5465	13.4044	1.05081	6.92687e-26
RBM42	ENSG00000126254	11.7635	10.2187	1.04972	1.38642e-07
PGLS	ENSG00000130313	12.1978	10.5057	1.04964	1.39244e-07
AP1B1	ENSG00000100280	12.5137	10.7815	1.04643	0.00455089
RXRB	ENSG00000204231	9.4969	8.19144	1.0461	0.0024635
DYRK1B	ENSG00000105204	11.6581	9.81023	1.04508	0.00843171
SCRN2	ENSG00000141295	10.1822	8.97568	1.03858	0.00487783
MAZ	ENSG00000103495	14.8821	13.3776	1.03681	5.78855e-07
CASKIN1	ENSG00000167971	10.2063	8.64934	1.03641	0.00493127
FKBP8	ENSG00000105701	14.8465	12.8669	1.03331	1.85807e-06
SCARB1	ENSG00000073060	11.5109	10.4579	1.03177	0.00153707
SLC39A3	ENSG00000141873	10.174	8.2074	1.03122	0.00019936
E2F1	ENSG00000101412	10.122	8.81849	1.03068	9.06029e-06
MGMT	ENSG00000170430	11.2454	9.71378	1.03062	0.000311081
CARM1	ENSG00000142453	13.411	11.6686	1.03048	0.000112255
C7orf50	ENSG00000146540	11.9152	10.2456	1.03015	0.00430328
OGFR	ENSG00000060491	11.4304	9.61924	1.02708	1.21278e-07
CPSF3L	ENSG00000127054	11.5922	10.2046	1.02352	0.0051645
PMPCA	ENSG00000165688	11.8668	10.2716	1.02307	5.10771e-09
UBTF	ENSG00000108312	12.3903	10.9433	1.01961	6.10942e-09
PRDX1	ENSG00000117450	13.0992	12.2306	1.01869	1.92684e-08
HOMER3	ENSG00000051128	10.8245	9.20312	1.01656	0.000723165
ALDOA	ENSG00000149925	15.7844	14.5092	1.0153	0.000153543
SEZ6L2	ENSG00000174938	11.3472	10.0799	1.01445	0.000751423
MAP2K2	ENSG00000126934	13.8772	11.774	1.01407	7.94418e-05
WDR34	ENSG00000119333	14.5577	12.654	1.01361	0.00466036
IMPDH2	ENSG00000178035	12.5479	11.005	1.01222	0.00591452
AES	ENSG00000104964	14.3576	12.6796	1.00724	8.82403e-11
NAA60	ENSG00000122390	11.6072	10.2414	1.00626	0.00268478
KMT5C	ENSG00000133247	11.2001	9.8225	1.00534	2.07171e-06
TRIM41	ENSG00000146063	9.74279	8.80441	1.0051	0.000771435
GNB2	ENSG00000172354	12.2157	11.3517	1.00488	0.000337955
APOPT1	ENSG00000256053	10.7875	9.67739	1.00474	0.00225709
MCRS1	ENSG00000187778	12.2647	10.8904	1.0041	1.26217e-07
RPS9	ENSG00000170889	12.9935	11.6919	1.00273	7.23216e-05
SLC2A4RG	ENSG00000125520	13.7898	12.2666	1.00256	4.71755e-10
STARD10	ENSG00000214530	15.8265	13.6311	1.00185	1.97328e-14
MCRIP2	ENSG00000172366	11.3968	9.88385	1.00098	3.26731e-05
